# Supplementary material for: High-emission socioeconomic pathways threaten phoD-harboring bacterial communities in cold ecosystems
Source: Research Square preprint supplement (doi:10.21203/rs.3.rs-6055015/v1), 2025-03-12
Supplement: Supplementary file 1 [file 57b250dea2e675eb06aea3b2.xlsx]

## Sheet: TableS1_ReferenceListOfData
ID	Refence_Style1	Refence_Style2	Achieve	Accession_number
1	Ragot et al., 2015_AEM	Ragot, S.A., Kertesz, M.A., Bünemann, E.K., 2015. phoD alkaline phosphatase gene diversity in Soil. Appl. Environ. Microbiol., 81, 7281-7289. https://doi.org/10.1128/AEM.01823-15.	ENA	ERP012746
2	Wei_2021_SBB	Wei, X. et al., 2021. Organic phosphorus availability shapes the diversity of phoD-harboring bacteria in agricultural soil. Soil. Biol. Biochem., 161, 108364. https://doi.org/10.1016/j.soilbio.2021.108364.	SRA	PRJNA577346
3	Liu_2021_SBB	Liu, W. et al., 2021. Active phoD-harboring bacteria are enriched by long-term organic fertilization. Soil. Biol. Biochem., 152, 108071. https://doi.org/10.1016/j.soilbio.2020.108071.	CRA	CRA002827
4	Graça_2021_EJSB	Graça, J. et al., 2021. Drainage class and soil phosphorus availability shape microbial communities in Irish grasslands. Eur. J. Soil. Biol., 104, 103297. https://doi.org/10.1016/j.ejsobi.2021.103297.	SRA	PRJEB27448
5	Lang_2022_Fron_Micro	Lang, M., Li, H., Lakshmanan, P., Chen, Y., Chen, X., 2022. phoD-harboring bacterial community composition dominates organic P mineralization under long-term P fertilization in acid purple soil. Front. Microbiol., 1310.https://doi.org/10.3389/fmicb.2022.1045919	SRA	PRJNA787763
6	Wan_2021_STOTEN	Wan, W. et al., 2021. Dispersal limitation driving phoD -harboring bacterial community assembly: A potential indicator for ecosystem multifunctionality in long-term fertilized soils. Sci. Total. Environ., 754.https://doi.org/10.1016/j.scitotenv.2020.141960.	SRA	PRJNA616154
7	Neha_2023_Plants	Neha, Bhardwaj, Y., Reddy, B., Dubey, S.K., 2023. Organic Farming Favors phoD-Harboring Rhizospheric Bacterial Community and Alkaline Phosphatase Activity in Tropical Agroecosystem. Plants, 12, 1068. https://doi.org/10.3390/plants12051068.	SRA	PRJNA797670
8	Gaiero_2021_FEMS_Micro_Eco	Gaiero, J.R. et al., 2021. Soil microbial communities influencing organic phosphorus mineralization in a coastal dune chronosequence in New Zealand. FEMS Microbiol. Ecol., 97. https://doi.org/10.1093/femsec/fiab034.	SRA	PRJNA657880
9	Liu_2020_SBB	Liu, J. et al., 2020. Long-term high-P fertilizer input decreased the total bacterial diversity but not phoD-harboring bacteria in wheat rhizosphere soil with available-P deficiency. Soil. Biol. Biochem., 149, 107918. https://doi.org/10.1016/j.soilbio.2020.107918.	CRA	CNP0000424
10	Liu_2021_BFS	Liu, S., Zhang, X., Dungait, J.A.J., Quine, T.A., Razavi, B.S., 2021a. Rare microbial taxa rather than phoD gene abundance determine hotspots of alkaline phosphomonoesterase activity in the karst rhizosphere soil. Biol. Fert. Soils., 57, 257-268. https://doi.org/10.1007/s00374-020-01522-4.	SRA	PRJNA594817
11	Zheng_2021_EJSB	Zheng, M.M. et al., 2021. Changes of acid and alkaline phosphatase activities in long-term chemical fertilization are driven by the similar soil properties and associated microbial community composition in acidic soil. Eur. J. Soil. Biol., 104, 103312. https://doi.org/10.1016/j.ejsobi.2021.103312.	SRA	PRJNA631887
12	Ragot_2017_FEMS	Ragot, S.A., Kertesz, M.A., Mészáros, É., Frossard, E., Bünemann, E.K., 2017. Soil phoD and phoX alkaline phosphatase gene diversity responds to multiple environmental factors. FEMS Microbiol. Ecol., 93. http://doi.org/10.1093/femsec/fiw212.	ENA	PRJEB11367,PRJEB7946
13	Bai_2020_msystems	Bai, Y. et al., 2020. Plant and Soil Development Cooperatively Shaped the Composition of the phoD-Harboring Bacterial Community along the Primary Succession in the Hailuogou Glacier Chronosequence. mSystems, 5, 10.1128/msystems.00475-20. https://doi.org/10.1128/msystems.00475-20.	SRA	PRJNA597270
14	Tian_2021_STOTEN	Tian, J. et al., 2021. Biochar application under low phosphorus input promotes soil organic phosphorus mineralization by shifting bacterial phoD gene community composition. Sci. Total. Environ., 779, 146556. https://doi.org/10.1016/j.scitotenv.2021.146556.	SRA	PRJNA657485
15	Jiang_2022_ASE	Jiang, N. et al., 2022. Effects of the reduction in chemical fertilizers on soil phosphatases encoding genes (phoD and phoX) under crop residue mulching. Appl. Soil. Ecol., 175, 104428. https://doi.org/10.1016/j.apsoil.2022.104428.	SRA	PRJNA628084
16	Chen_2021_SBB	Chen, X., Condron, L.M., Dunfield, K.E., Wakelin, S.A., Chen, L., 2021. Impact of grassland afforestation with contrasting tree species on soil phosphorus fractions and alkaline phosphatase gene communities. Soil. Biol. Biochem., 159, 108274. https://doi.org/10.1016/j.soilbio.2021.108274.	SRA	PRJNA628146
17	Wang_2023_STR	Wang, Y., Luo, D., Xiong, Z., Wang, Z., Gao, M., 2023. Changes in rhizosphere phosphorus fractions and phosphate-mineralizing microbial populations in acid soil as influenced by organic acid exudation. Soil and Tillage Research, 225, 105543. https://doi.org/10.1016/j.still.2022.105543.	SRA	PRJNA680444
18	Wan_2021_Geoderma	Wan, W. et al., 2021. Adaptation of phoD-harboring bacteria to broader environmental gradients at high elevations than at low elevations in the Shennongjia primeval forest. Geoderma, 401, 115210. https://doi.org/10.1016/j.geoderma.2021.115210.	SRA	PRJNA669371
19	Wang_2021_Forest	Wang, F., Zhang, Y., Xia, Y., Cui, Z., Cao, C., 2021. Soil Microbial Community Succession Based on PhoD and Gcd Genes along a Chronosequence of Sand-Fixation Forest, Forests. https://doi.org/10.3390/f12121707.	SRA	PRJNA739822
20	Zeng_2022_AEE	Zeng, Q., Mei, T., Delgado-Baquerizo, M., Wang, M., Tan, W., 2022. Suppressed phosphorus-mineralizing bacteria after three decades of fertilization. Agric. Ecosyst. Environ., 323, 107679. https://doi.org/10.1016/j.agee.2021.107679.	SRA	PRJNA663726
21	Mise_2018_Microbes Environ	Mise, K., Fujita, K., Kunito, T., Senoo, K., Otsuka, S., 2018. Phosphorus-mineralizing Communities Reflect Nutrient-Rich Characteristics in Japanese Arable Andisols. Microbes Environ, 33, 282-289. https://doi.org/10.1264/jsme2.ME18043.	SRA	PRJDB6544
22	Lu_2023_agronomy	Lu, P. et al., 2023. PhoD Harboring Microbial Community and Alkaline Phosphatase as Affected by Long Term Fertilization Regimes on a Calcareous Soil. Agronomy, 13, 363. https://doi.org/10.3390/agronomy13020363.	SRA	PRJNA923783
23	Gou_2021_JSS	Gou, X. et al., 2021. Effects of different long-term cropping systems on phoD-harboring bacterial community in red soils. Journal of Soils and Sediments, 21, 376-387. https://doi.org/10.1007/s11368-020-02749-2.	SRA	PRJNA526284
24	Li_2022_FronMicro	Li, Z. et al., 2022. Changes in soil properties and the phoD-harboring bacteria of the alfalfa field in response to phosphite treatment. Front. Microbiol., 13. https://doi.org/10.3389/fmicb.2022.1013896.	SRA	PRJNA874476
25	Xiong_2023_EcoInd	Xiong, X., Wan, W., 2023. Distinct distribution patterns of rare and abundant alkaline phosphatase-harboring bacteria in plateau wetlands. Ecological Indicators, 146, 109803. https://doi.org/10.1016/j.ecolind.2022.109803.	SRA	PRJNA747550
26	Sun_2021_AMB	Sun, Q. et al., 2021. Flooding and straw returning regulates the partitioning of soil phosphorus fractions and phoD-harboring bacterial community in paddy soils. Appl. Microbiol. Biot., 105, 9343-9357. 10.1007/s00253-021-11672-6.	SRA	PRJNA551968
27	Wei_2019_SBB	Wei, X. et al., 2019. Rare taxa of alkaline phosphomonoesterase-harboring microorganisms mediate soil phosphorus mineralization. Soil. Biol. Biochem., 131, 62-70. https://doi.org/10.1016/j.soilbio.2018.12.025.	SRA	PRJNA412700
28	Guo_2022_Rhizosphere	Guo, L., Wang, C., Shen, R.F., 2022. Stronger effects of maize rhizosphere than phosphorus fertilization on phosphatase activity and phosphorus-mineralizing-related bacteria in acidic soils. Rhizosphere, 23, 100555. https://doi.org/10.1016/j.rhisph.2022.100555.	SRA	PRJNA753938
29	Cheng_2022_EcoEngi	Cheng, J., Zhang, Y., Wang, H., Cui, Z., Cao, C., 2022. Sand-fixation plantation type affects soil phosphorus transformation microbial community in a revegetation area of Horqin Sandy Land, Northeast China. Ecological Engineering, 180, 106644. https://doi.org/10.1016/j.ecoleng.2022.106644.	SRA	PRJNA707348
30	Xia_2022_FE	Xia, Z., He, Y., Zhu, Z., Korpelainen, H., Li, C., 2022. Covariations and trade-offs of phosphorus (P) acquisition strategies in dioecious Populus euphratica as affected by soil water availability. Func. Ecol., 36, 3188-3199. https://doi.org/10.1111/1365-2435.14193.	SRA	PRJNA880504
31	Zhong_2022_Agriculture	Zhong, F. et al., 2022. Effects of Lake Sediment on Soil Properties, Crop Growth, and the phoD-Harboring Microbial Community, Agriculture. https://doi.org/10.3390/agriculture12122065.	SRA	PRJNA945413
32	Guo_2023_PlantSoil	Guo, L., Wang, C., Feng, T.Y., Shen, R.F., 2023. Short-term application of organic fertilization impacts phosphatase activity and phosphorus-mineralizing bacterial communities of bulk and rhizosphere soils of maize in acidic soil. Plant Soil, 484, 95-113. https://doi.org/10.1007/s11104-022-05775-w.	SRA	PRJNA826662
33	Wang_2023_PlantSoil	Wang, Y. et al., 2023b. Phod-harboring bacterial communities mediated slow and fast phosphorus transformation in alkaline soil of a Robinia pseudoacacia afforestation chronosequence. Plant Soil, 488, 517-532. https://doi.org/10.1007/s11104-023-05990-z.	SRA	PRJNA812733
34	Chenshuo_2023_STOTEN	Chen, S. et al., 2023. Soil organic carbon stability mediate soil phosphorus in greenhouse vegetable soil by shifting phoD-harboring bacterial communities and keystone taxa. Sci. Total. Environ., 873, 162400. https://doi.org/10.1016/j.scitotenv.2023.162400.	SRA	PRJNA836149
35	Zhao_2022_FrontierMicro	Zhao, X., Zhang, Y., Cui, Z., Peng, L., Cao, C., 2022. Dynamics of phoD- and gcd-Harboring Microbial Communities Across an Age Sequence of Biological Soil Crusts Under Sand-Fixation Plantation. Front. Microbiol., 13.https://doi.org/10.3389/fmicb.2022.831888.	SRA	PRJNA530848
36	LiJiabao_2021_Geoderma	Li, J. et al., 2021. Alkaline phosphatase activity mediates soil organic phosphorus mineralization in a subalpine forest ecosystem. Geoderma, 404, 115376. https://doi.org/10.1016/j.geoderma.2021.115376.	EGCloud	PRJ-AMPLI- 148b3064f3e72198b282ace4cab70cdd
37	Xie_2020_ASE	Xie, Y., Wang, F., Wang, K., Yue, H., Lan, X., 2020. Responses of bacterial phoD gene abundance and diversity to crop rotation and feedbacks to phosphorus uptake in wheat. Appl. Soil. Ecol., 154, 103604. https://doi.org/10.1016/j.apsoil.2020.103604.	SRA	PRJNA534369
38	Bergkemper_2015_EM	Bergkemper, F. et al., 2015. Phosphorus depletion in forest soils shapes bacterial communities towards phosphorus recycling systems. Environ. Microbiol., 18https://doi.org/10.1111/1462-2920.13188.	ENA	PRJEB13290
39	Chen_2022_EnvRes	How dam construction affects the activity of alkaline phosphatases in reservoir sediments: A study of two highly regulated rivers	SRA	PRJNA718422
40	Yang_2023_Ecoind	Yang, Y. et al., 2023. Spatial difference in phoD-harboring bacterial landscape between soils and sediments along the Yangtze River. Ecological Indicators, 153, 110447. https://doi.org/10.1016/j.ecolind.2023.110447.	SRA	PRJNA772882
41	Li_2021_FES	Li, M., Hu, J., Lin, X., 2021b. Profiles and interrelationships of functional soil microbiomes involved in phosphorus cycling in diversified agricultural land-use systems. Food and Energy Security, 10, e315. https://doi.org/10.1002/fes3.315.	SRA	PRJNA632648
42	Sun_2020_SBB	Sun, Q. et al., 2021. Flooding and straw returning regulates the partitioning of soil phosphorus fractions and phoD-harboring bacterial community in paddy soils. Appl. Microbiol. Biot., 105, 9343-9357. 10.1007/s00253-021-11672-6.	SRA	PRJNA615753
43	Yuan_2023_WaterRes	Yuan, H. et al., 2023. How phoD-harboring functional microbial populations trigger the release risk of phosphorus in water sediment system of Shijiuhu Lake, China after experiencing the transseasonal shift. Water Research, 240, 120107. https://doi.org/10.1016/j.watres.2023.120107.	SRA	PRJNA939838
44	Bi_2020_STOTEN	Bi, Q.-F. et al., 2020. Partial replacement of inorganic phosphorus (P) by organic manure reshapes phosphate mobilizing bacterial community and promotes P bioavailability in a paddy soil. Sci. Total. Environ., 703, 134977. https://doi.org/10.1016/j.scitotenv.2019.134977.	SRA	PRJNA543033
45	Luo_2017_BFS	Luo, G. et al., 2017. Long-term fertilisation regimes affect the composition of the alkaline phosphomonoesterase encoding microbial community of a vertisol and its derivative soil fractions. Biol. Fert. Soils., 53, 375-388. https://doi.org/10.1007/s00374-017-1183-3.	SRA	PRJNA338077
46	Azziz_2023_Microorganisms	Azziz, G. et al., 2023. Legume Overseeding and P Fertilization Increases Microbial Activity and Decreases the Relative Abundance of AM Fungi in Pampas Natural Pastures. Microorganisms, 11, 1383. https://doi.org/10.3390/microorganisms11061383.	SRA	PRJNA961077
47	Zhang_2020_STOTEN	Zhang, T. et al., 2020. Suspended particles phoD alkaline phosphatase gene diversity in large shallow eutrophic Lake Taihu. Sci. Total. Environ., 728, 138615. https://doi.org/10.1016/j.scitotenv.2020.138615.	SRA	PRJNA563506
48	Chen_2019_STOTEN	Chen, J. et al., 2019. Effects of decabromodiphenyl ether on activity, abundance, and community composition of phosphorus mineralizing bacteria in eutrophic lake sediments. Sci. Total. Environ., 695, 133785. https://doi.org/10.1016/j.scitotenv.2019.133785.	SRA	PRJNA485649
49	Li_2023_SciRep	Li, Y., Yu, X., Liu, H., Gong, Z., 2023. The spatio-temporal distribution of alkaline phosphatase activity and phoD gene abundance and diversity in sediment of Sancha Lake. Scientific Reports, 13, 3121. https://doi.org/10.1038/s41598-023-29983-1.	SRA	PRJNA623151
50	Wang_2023_Rhizosphere	Wang, F., Wei, X., Zhang, L., Feng, G., 2023a. Long-term fertilisation management changes bacterial phoD and gcd gene communities and abundances in the rhizosphere of cotton (Gossypium hirsutum L.) grown in a grey desert soil. Rhizosphere, 28, 100797. https://doi.org/10.1016/j.rhisph.2023.100797.	SRA	PRJNA642697
51	Dunfield_2024_Env_Micro	Dunfield, K.E. et al., 2024. Differential structure and function of phosphorus-mineralizing microbial communities in organic and upper mineral soil horizons across a temperate rainforest chronosequence. Environmental Microbiology, 26, e16600. https://doi.org/10.1111/1462-2920.16600.	SRA	PRJNA997728
52	Chiba_2024_ASE	Chiba, A. et al., 2024. Earthworm activities change phosphorus mobilization and uptake strategies in deep soil layers. Applied Soil Ecology, 193, 105168. https://doi.org/10.1016/j.apsoil.2023.105168.	SRA	PRJNA706689
53	Zhuo_2023_STOTEN	the sediment–water interface of a river system: An in situ study involving the DGT technique. Science of The Total Environment, 863, 160855. https://doi.org/10.1016/j.scitotenv.2022.160855.	SRA	PRJNA871209
54	Yang_2023_STR	Yang, L., Du, L., Li, W., Wang, R., Guo, S., 2023a. Divergent responses of phoD- and pqqC-harbouring bacterial communities across soil aggregates to long fertilization practices. Soil and Tillage Research, 228, 105634. https://doi.org/10.1016/j.still.2023.105634.	SRA	PRJNA869840
55	Zhang_2023_FCRes	Zhang, S., Huo, W., Maimaitiaili, B., Peng, Y., Feng, G., 2023. Manure application enhanced cotton yield by facilitating microbially mediated P bioavailability. Field Crops Research, 304, 109153. https://doi.org/10.1016/j.fcr.2023.109153.	SRA	PRJNA935953
56	laRosa_2022_ME	la Rosa, G.M.-d. et al., 2023. Amino Acids in the Root Exudates of Agave lechuguilla Torr. Favor the Recruitment and Enzymatic Activity of Nutrient-Improvement Rhizobacteria. Microbial Ecology, 86, 1176-1188. https://doi.org/10.1007/s00248-022-02162-x.	SRA	PRJNA672793
57	Deinert_2024_Environments	Deinert, L., Schmalenberger, A., 2024. Reuse of Soils Fertilized with Ash as Recycling Derived Fertilizer Revealed Strong Stimulation of Microbial Communities Involved in P Mobilization in Lolium perenne Rhizospheres. Environments 11, 49. https://doi.org/10.3390/environments11030049.	SRA	PRJNA1043576
58	Deng_2024_JEM	Deng, P., Zhou, Y., Chen, W., Tang, F., Wang, Y., 2024. Microbial mechanisms for improved soil phosphorus mobilization in monoculture conifer plantations by mixing with broadleaved trees. Journal of Environmental Management 359, 120955. https://doi.org/10.1016/j.jenvman.2024.120955.	SRA	PRJNA985429
59	Gao_2024_FuncEco	Gao, Y., Tariq, A., Zeng, F., Sardans, J., Al-Bakre, D.A., Peñuelas, J., Fractions of soil phosphorus mediated by rhizospheric phoD-harbouring bacteria of deep-rooted desert species are determined by fine-root traits. Functional Ecology n/ahttps://doi.org/10.1111/1365-2435.14635.	Figshare	https://doi.org/10.6084/m9.figshare.26419813.v1
60	This study	-	SRA/CRA	Qinghai-Tibet grid sampling：PRJCA019578 Chinese desert biocrust:PRJNA1010136 Chinese grassland sampling:PRJNA596826 Subtropical forest:

## Sheet: TableS2_Environmental_data
Project_ID	Order	Primer_group	Primer	Sample_name	Reference	Landuse	Koppen_Climates	Ecosystem_types_group	Ecosystem_types	Crop_or_plant_type	Lat	Long	Elevation	MAT	AI	MAP	pH	TOC	TN	TP	AP	Cpratio
P1	1	F733-R1083	2	ERR738587	Ragot et al., 2015_AEM	Grasslands	Temperate	Temperate_Grasslands	9	Microlaena stipoides, Austrodanthonia spp., Elymus scaber, Bothriochloa macra, Austrostipa spp.	-34.805	148.583	511	14.2833	0.5022	805	4.2	21	1.8004	0.221	8.27675	95.0226
P2	2	F733-R1083	2	ERR738589	Ragot et al., 2015_AEM	Grasslands	Temperate	Temperate_Grasslands	9	Chrysocephalum sp., Themeda sp., Festuca arundinacea	-30.2539	149.865	257	18.7042	0.3175	654	6.1	23.7	1.96969	0.705	17.7506	33.617
P3	3	F733-R1083	2	ERR738591	Ragot et al., 2015_AEM	Grasslands	Arid	Arid_Grasslands	2	Mixed grasses and dicot plants; clumpy cover, not a sward	-31.4311	147.069	167	18.9625	0.227	483	4.7	15	1.4242	0.466	13.0724	32.1888
P4	4	F733-R1083	2	ERR738593	Ragot et al., 2015_AEM	Grasslands	Arid	Arid_Grasslands	2	Chenopodium sp., Acacia sp., Astrebla sp	-31.2719	142.296	222	19.3125	0.0979	245	6.8	5	0.7972	0.193	7.72868	25.9067
P5	5	F733-R1083	2	ERR738595	Ragot et al., 2015_AEM	Grasslands	Temperate	Temperate_Grasslands	9	Arrhenaterion elatioris	47.4292	8.49194	446	9.525	1.1804	1069	5	27.5	2.20795	0.613	15.9498	44.8613
P6	6	F733-R1083	2	ERR738597	Ragot et al., 2015_AEM	Grasslands	Temperate	Temperate_Grasslands	9	Arrhenaterion elatioris	47.4292	8.49194	446	9.525	1.1804	1069	6.1	34.4	2.64058	0.703	17.7114	48.9331
P7	7	F730-R1101	1	SRR10606298	Wei_2021_SBB	Croplands	Cold	Croplands	4	Maize	43.63	124.94	218	5.9	0.5038	621.2	6.3	22.66	1.17	0.74685	76.63	30.3408
P8	8	F730-R1101	1	SRR10606297	Wei_2021_SBB	Croplands	Cold	Croplands	4	Maize	43.58	124.87	233	6.1	0.5064	623	5.22	18.47	1.06	0.33465	37.12	55.192
P9	9	F730-R1101	1	SRR10606295	Wei_2021_SBB	Croplands	Cold	Croplands	4	Maize	43.54	124.88	214	6.1	0.5131	623.5	5.08	22.42	1.05	0.4331	52.9	51.7663
P10	10	F730-R1101	1	SRR10606294	Wei_2021_SBB	Croplands	Cold	Croplands	4	Maize	43.47	124.78	195	6.2	0.5123	623.3	4.95	22.51	1.06	0.54228	46.23	41.5099
P11	11	F730-R1101	1	SRR10606293	Wei_2021_SBB	Croplands	Cold	Croplands	4	Maize	43.44	124.7	181	6.1	0.5069	625.8	5.86	33.58	1.23	0.51147	39.58	65.6539
P12	12	F730-R1101	1	SRR10606292	Wei_2021_SBB	Croplands	Cold	Croplands	4	Maize	43.39	124.64	212	6.1	0.512	628.6	5.76	32.43	1.34	0.60295	58.3	53.7856
P13	13	F730-R1101	1	SRR10606291	Wei_2021_SBB	Croplands	Cold	Croplands	4	Maize	43.38	124.62	226	6.1	0.5116	629.5	5.01	24.11	1.36	0.87863	83.97	27.4404
P14	14	F730-R1101	1	SRR10606290	Wei_2021_SBB	Croplands	Cold	Croplands	4	Maize	43.38	124.64	217	6.1	0.5124	629.6	6.02	26.87	1.22	0.65616	67.97	40.9504
P15	15	F730-R1101	1	SRR10606261	Wei_2021_SBB	Croplands	Temperate	Croplands	4	Rice	29.77	121.34	35	16.2	0.992	1494.1	5.41	47.73	2.61	0.21892	42.13	218.025
P16	16	F730-R1101	1	SRR10606260	Wei_2021_SBB	Croplands	Temperate	Croplands	4	Rice	29.77	121.34	35	16.2	0.992	1494.1	5.33	48.89	2.82	0.33239	52.65	147.086
P17	17	F730-R1101	1	SRR10606259	Wei_2021_SBB	Croplands	Temperate	Croplands	4	Rice	29.82	121.73	5	16.2	0.9972	1381.7	6.44	26.59	1.71	0.23315	38.58	114.047
P18	18	F730-R1101	1	SRR10606258	Wei_2021_SBB	Croplands	Temperate	Croplands	4	Rice	28.49	121.26	13	17	1.124	1713.4	6.53	46.67	2.43	0.75189	95.17	62.0702
P19	19	F730-R1101	1	SRR10606257	Wei_2021_SBB	Croplands	Temperate	Croplands	4	Rice	31.57	121.69	3	15	0.8328	1116.3	8.54	18.95	1.35	0.40956	29.58	46.2692
P20	20	F730-R1101	1	SRR10606256	Wei_2021_SBB	Croplands	Temperate	Croplands	4	Rice	31.57	121.69	3	15	0.8328	1116.3	8.61	15.08	1.14	0.66633	13.6	22.6314
P21	21	F730-R1101	1	SRR10606255	Wei_2021_SBB	Croplands	Temperate	Croplands	4	Rice	31.51	121.78	2	15.1	0.8239	1116.3	8.59	14.12	1.16	0.54486	2.59	25.9149
P22	22	F730-R1101	1	SRR10606254	Wei_2021_SBB	Croplands	Temperate	Croplands	4	Rice	31.51	121.78	2	15.1	0.8239	1116.3	8.36	19.21	1.26	0.33544	4.08	57.2681
P23	23	F730-R1101	1	SRR10606253	Wei_2021_SBB	Croplands	Temperate	Croplands	4	Rice	30.98	121.03	5	15.5	0.8166	1216.5	6.47	30.54	1.67	0.62288	31.58	49.0303
P24	24	F730-R1101	1	SRR10606251	Wei_2021_SBB	Croplands	Temperate	Croplands	4	Rice	31.49	121.35	5	15.2	0.8168	1113.6	7.49	54.83	1.78	0.42604	9.88	128.697
P25	25	F730-R1101	1	SRR10606250	Wei_2021_SBB	Croplands	Temperate	Croplands	4	Rice	30.98	121.57	5	15.6	0.8078	1166.5	8.33	29.13	1.14	0.42247	13.38	68.9516
P26	26	F730-R1101	1	SRR10606249	Wei_2021_SBB	Croplands	Temperate	Croplands	4	Rice	30.98	121.57	5	15.6	0.8078	1166.5	8.46	14.14	1.05	0.25775	14.39	54.8594
P27	27	F730-R1101	1	SRR10606248	Wei_2021_SBB	Croplands	Temperate	Croplands	4	Rice	33.38	120.24	2	14	0.7701	1229.1	8.73	12.47	1.21	0.75174	29.44	16.5882
P28	28	F730-R1101	1	SRR10606247	Wei_2021_SBB	Croplands	Temperate	Croplands	4	Rice	33.38	120.24	2	14	0.7701	1229.1	8.7	16.93	1.17	0.36297	21.43	46.643
P29	29	F730-R1101	1	SRR10606246	Wei_2021_SBB	Croplands	Temperate	Croplands	4	Rice	33.43	120.14	2	14	0.7397	1239.2	8.49	18.04	1.63	0.39908	5.62	45.204
P30	30	F730-R1101	1	SRR10606245	Wei_2021_SBB	Croplands	Temperate	Croplands	4	Rice	33.43	120.14	2	14	0.7397	1239.2	8.45	29.23	1.75	0.61121	6.91	47.8232
P31	31	F730-R1101	1	SRR10606244	Wei_2021_SBB	Croplands	Temperate	Croplands	4	Rice	33.29	120.15	0	14	0.7693	1217.4	7.77	33.33	1.41	0.47417	26.95	70.2912
P32	32	F730-R1101	1	SRR10606243	Wei_2021_SBB	Croplands	Temperate	Croplands	4	Rice	33.29	120.15	0	14	0.7693	1217.4	7.61	24.27	1.41	0.24403	29.36	99.455
P33	33	F730-R1101	1	SRR10606242	Wei_2021_SBB	Croplands	Temperate	Croplands	4	Rice	24.25	102.48	1684	13.5	0.7204	892.1	8.59	17.23	1.2	0.89995	67.16	19.1455
P34	34	F730-R1101	1	SRR10606240	Wei_2021_SBB	Croplands	Temperate	Croplands	4	Rice	24.25	102.48	1684	13.5	0.7204	892.1	8.57	25.52	1.51	0.74108	56.64	34.4362
P35	35	F730-R1101	1	SRR10606239	Wei_2021_SBB	Croplands	Temperate	Croplands	4	Rice	24.75	99.76	2107	13.6	0.7956	1201.7	5.72	69.33	2.91	0.59348	31.64	116.819
P36	36	F730-R1101	1	SRR10606238	Wei_2021_SBB	Croplands	Temperate	Croplands	4	Rice	25	98.29	1751	12.6	1.1858	1506.9	6.34	88.58	4.01	0.3515	26.24	252.006
P37	37	F730-R1101	1	SRR10606237	Wei_2021_SBB	Croplands	Temperate	Croplands	4	Rice	25.37	100.19	2050	14.4	0.6448	829.5	7.98	59.53	2.34	0.41184	19.55	144.546
P38	38	F730-R1101	1	SRR10606236	Wei_2021_SBB	Croplands	Temperate	Croplands	4	Rice	26.05	112.96	138	17.3	1.1926	1441.4	8.52	32.66	1.72	0.04236	2.01	771.01
P39	39	F730-R1101	1	SRR10606235	Wei_2021_SBB	Croplands	Temperate	Croplands	4	Rice	26.15	112.54	285	16.4	1.235	1370.7	8.49	21.34	2.15	0.26415	16.71	80.7874
P40	40	F730-R1101	1	SRR10606234	Wei_2021_SBB	Croplands	Temperate	Croplands	4	Rice	28.77	111.61	61	16.4	1.1042	1398.8	6.2	24.4	1.63	0.09018	10.49	270.57
P41	41	F730-R1101	1	SRR10606233	Wei_2021_SBB	Croplands	Temperate	Croplands	4	Rice	29.29	112.17	32	16.5	1.0405	1255.2	6.13	24.64	1.61	0.11848	11.04	207.968
P42	42	F730-R1101	1	SRR10606232	Wei_2021_SBB	Croplands	Temperate	Croplands	4	Rice	29.03	112.04	29	16.6	1.0622	1335.5	8.44	19.19	1.53	0.16933	10.33	113.329
P43	43	F730-R1101	1	SRR10606231	Wei_2021_SBB	Croplands	Temperate	Croplands	4	Rice	23.5	108.22	272	20.7	1.279	1521.3	6.93	8.47	0.86	0.01825	2.88	464.11
P44	44	F730-R1101	1	SRR10606229	Wei_2021_SBB	Croplands	Temperate	Croplands	4	Rice	23.62	108.35	393	19.2	1.3004	1571.2	6.94	7.96	0.89	0.02084	4.56	381.958
P45	45	F730-R1101	1	SRR10606228	Wei_2021_SBB	Croplands	Temperate	Croplands	4	Rice	23.34	108.18	148	21.1	1.2131	1349.4	7.95	6.67	0.83	0.02248	3.84	296.708
P46	46	F730-R1101	1	SRR10606227	Wei_2021_SBB	Croplands	Temperate	Croplands	4	Rice	24.21	113.7	86	20	1.2864	1885.2	7.41	27.36	1.65	0.13541	20.85	202.053
P47	47	F730-R1101	1	SRR10606226	Wei_2021_SBB	Croplands	Temperate	Croplands	4	Rice	24.14	112.97	122	20	1.3228	1967.6	5.21	11.38	1.04	0.17131	34.8	66.4293
P48	48	F730-R1101	1	SRR10606225	Wei_2021_SBB	Croplands	Temperate	Croplands	4	Rice	22.13	110.82	80	22.3	1.1935	1837.4	6.13	11.52	0.92	0.41	167.22	28.0976
P49	49	F730-R1101	1	SRR10606224	Wei_2021_SBB	Croplands	Temperate	Croplands	4	Rice	22.03	111.09	196	20.7	1.2985	1780.4	5.94	24	1.47	1.35781	141.46	17.6755
P50	50	F730-R1101	1	SRR10606223	Wei_2021_SBB	Croplands	Temperate	Croplands	4	Rice	22.28	112.6	38	21.9	1.4649	2073.3	6.84	19.7	1.56	0.26661	21.26	73.8907
P51	51	F730-R1101	1	SRR10606222	Wei_2021_SBB	Croplands	Temperate	Croplands	4	Rice	21.87	112.5	6	22.2	1.5062	2287.9	6.94	32.19	1.83	0.0675	14.3	476.889
P52	52	F730-R1101	1	SRR10606221	Wei_2021_SBB	Croplands	Temperate	Croplands	4	Rice	26.06	119.18	11	19.7	1.0012	1412.1	5.09	25.02	1.4	1.08756	13.23	23.0056
P53	53	F730-R1101	1	SRR10606220	Wei_2021_SBB	Croplands	Temperate	Croplands	4	Rice	26.06	119.18	11	19.7	1.0012	1412.1	5.09	21.45	1.35	0.95829	17.21	22.3836
P54	54	F730-R1101	1	SRR10606318	Wei_2021_SBB	Croplands	Temperate	Croplands	4	Rice	26.03	119.2	8	19.7	0.9957	1395.8	6.96	9.77	0.81	0.04412	18.75	221.442
P55	55	F730-R1101	1	SRR10606317	Wei_2021_SBB	Croplands	Temperate	Croplands	4	Rice	26.72	113.31	116	17	1.2023	1401.5	5.64	34.6	1.88	0.07106	13.48	486.912
P56	56	F730-R1101	1	SRR10606289	Wei_2021_SBB	Croplands	Temperate	Croplands	4	wheat_Maize	35.18	114.6	64	13.7	0.4133	541.4	6.49	17.75	1.22	1.06252	9.69	16.7056
P57	57	F730-R1101	1	SRR10606321	Wei_2021_SBB	Croplands	Cold	Croplands	4	Maize	44.09	125.44	216	5.3	0.4918	582.8	6.48	36.88	1.46	0.2965	18.59	124.384
P58	58	F730-R1101	1	SRR10606320	Wei_2021_SBB	Croplands	Cold	Croplands	4	Maize	44.14	125.5	194	5.3	0.4919	582.6	5.93	33.17	1.42	0.39086	31.18	84.8641
P59	59	F730-R1101	1	SRR10606307	Wei_2021_SBB	Croplands	Cold	Croplands	4	Maize	44.21	125.55	200	5.2	0.4902	583.6	5.83	30.48	1.44	0.90112	72.89	33.8246
P60	60	F730-R1101	1	SRR10606296	Wei_2021_SBB	Croplands	Cold	Croplands	4	Maize	44.24	125.55	192	5.1	0.486	580	6.07	28.3	1.35	0.6097	62.85	46.4163
P61	61	F730-R1101	1	SRR10606285	Wei_2021_SBB	Croplands	Cold	Croplands	4	Maize	44.31	125.58	179	5.1	0.4757	569.5	5.7	35.42	1.62	1.36045	76.3	26.0355
P62	62	F730-R1101	1	SRR10606274	Wei_2021_SBB	Croplands	Cold	Croplands	4	Maize	44.35	125.61	170	5	0.4756	566.5	8.05	41.17	1.64	0.50783	12.29	81.0704
P63	63	F730-R1101	1	SRR10606263	Wei_2021_SBB	Croplands	Cold	Croplands	4	Maize	44.38	125.65	179	5	0.4804	563.7	5.87	25.99	1.32	0.54748	78.12	47.4721
P64	64	F730-R1101	1	SRR10606252	Wei_2021_SBB	Croplands	Cold	Croplands	4	Maize	44.43	125.69	170	4.9	0.4737	560	4.63	31.11	1.41	0.65241	59.05	47.6847
P65	65	F730-R1101	1	SRR10606241	Wei_2021_SBB	Croplands	Cold	Croplands	4	Maize	44.64	125.88	192	4.8	0.4729	558	5.64	26.51	1.33	0.30434	26.34	87.1065
P66	66	F730-R1101	1	SRR10606230	Wei_2021_SBB	Croplands	Cold	Croplands	4	Maize	44.66	125.92	180	4.8	0.4721	557.3	4.85	25.34	1.32	0.68682	62.5	36.8947
P67	67	F730-R1101	1	SRR10606319	Wei_2021_SBB	Croplands	Cold	Croplands	4	Maize	44.82	126.02	192	4.6	0.4717	542.2	4.8	26.04	1.35	0.82904	72.68	31.4098
P68	68	F730-R1101	1	SRR10606316	Wei_2021_SBB	Croplands	Cold	Croplands	4	Maize	44.87	126.04	190	4.5	0.4698	535.6	5.23	25.02	1.34	0.42343	32.3	59.0889
P69	69	F730-R1101	1	SRR10606315	Wei_2021_SBB	Croplands	Cold	Croplands	4	Maize	44.95	126.08	189	4.5	0.4644	530.7	5.26	26.42	1.41	0.76427	56.55	34.5689
P70	70	F730-R1101	1	SRR10606314	Wei_2021_SBB	Croplands	Cold	Croplands	4	Maize	45	126.13	181	4.5	0.4601	535	5.29	26.19	1.37	0.52895	34.31	49.5132
P71	71	F730-R1101	1	SRR10606313	Wei_2021_SBB	Croplands	Cold	Croplands	4	Maize	45.09	126.19	143	4.4	0.4572	541.9	7.88	43.07	1.99	0.65367	15.15	65.8895
P72	72	F730-R1101	1	SRR10606312	Wei_2021_SBB	Croplands	Cold	Croplands	4	Maize	45.02	126.15	178	4.5	0.4606	537.6	5.47	26.87	1.32	0.50521	50.62	53.1858
P73	73	F730-R1101	1	SRR10606311	Wei_2021_SBB	Croplands	Cold	Croplands	4	Maize	45.06	126.19	162	4.5	0.4594	542.6	8.21	33.92	1.59	0.98388	38.04	34.4757
P74	74	F730-R1101	1	SRR10606310	Wei_2021_SBB	Croplands	Cold	Croplands	4	Maize	45.11	126.23	141	4.4	0.46	545.9	5.85	29.95	1.42	0.35727	37.59	83.8302
P75	75	F730-R1101	1	SRR10606309	Wei_2021_SBB	Croplands	Cold	Croplands	4	Maize	45.07	126.27	179	4.4	0.4597	551.9	5.51	27.36	1.39	0.71081	76.4	38.4913
P76	76	F730-R1101	1	SRR10606308	Wei_2021_SBB	Croplands	Cold	Croplands	4	Maize	45.23	126.22	152	4.3	0.4589	534.4	7.45	31.17	1.61	1.33498	69.98	23.3487
P77	77	F730-R1101	1	SRR10606306	Wei_2021_SBB	Croplands	Cold	Croplands	4	Maize	45.26	126.27	160	4.2	0.4603	530.2	5.48	33.02	1.46	0.6169	43.22	53.5257
P78	78	F730-R1101	1	SRR10606305	Wei_2021_SBB	Croplands	Cold	Croplands	4	Maize	45.3	126.29	159	4.2	0.4607	526.6	8.08	29.57	1.52	0.85272	27.41	34.6773
P79	79	F730-R1101	1	SRR10606288	Wei_2021_SBB	Croplands	Temperate	Croplands	4	wheat_Maize	34.51	113.89	139	13.5	0.4449	635.7	8.37	10.71	1.19	0.68076	39.57	15.7324
P80	80	F730-R1101	1	SRR10606287	Wei_2021_SBB	Croplands	Temperate	Croplands	4	wheat_Maize	34.47	113.96	109	13.6	0.4454	657.2	8.92	7.14	0.96	0.83642	49.02	8.53638
P81	81	F730-R1101	1	SRR10606286	Wei_2021_SBB	Croplands	Temperate	Croplands	4	wheat_Maize	34.42	114.25	68	13.5	0.4573	690.7	8.71	25.87	1.66	1.27192	59.88	20.3393
P82	82	F730-R1101	1	SRR10606284	Wei_2021_SBB	Croplands	Temperate	Croplands	4	wheat_Maize	34.5	114.35	68	13.6	0.4516	654.2	8.58	10.84	1.26	1.2533	21.38	8.64917
P83	83	F730-R1101	1	SRR10606283	Wei_2021_SBB	Croplands	Temperate	Croplands	4	wheat_Maize	34.74	114.41	69	13.8	0.433	586.9	8.68	24.02	1.28	1.33827	15.92	17.9485
P84	84	F730-R1101	1	SRR10606282	Wei_2021_SBB	Croplands	Temperate	Croplands	4	wheat_Maize	34.94	114.58	69	13.8	0.4252	575	8.42	20.51	1.26	0.72625	15.64	28.241
P85	85	F730-R1101	1	SRR10606281	Wei_2021_SBB	Croplands	Temperate	Croplands	4	wheat_Maize	35	114.59	67	13.7	0.4232	565.3	8.3	15.89	1.1	1.11951	31.47	14.1937
P86	86	F730-R1101	1	SRR10606280	Wei_2021_SBB	Croplands	Temperate	Croplands	4	wheat_Maize	35.07	114.6	67	13.7	0.4201	554.9	8.5	22.89	1.44	1.43997	55.66	15.8962
P87	87	F730-R1101	1	SRR10606279	Wei_2021_SBB	Croplands	Temperate	Croplands	4	wheat_Maize	35.16	114.63	63	13.7	0.4137	542.2	7.23	14.05	1.04	0.90173	15.51	15.5812
P88	88	F730-R1101	1	SRR10606278	Wei_2021_SBB	Croplands	Temperate	Croplands	4	wheat_Maize	35.19	114.49	66	13.7	0.4101	544.2	7.43	13.66	1.07	1.4807	6.72	9.22537
P89	89	F730-R1101	1	SRR10606277	Wei_2021_SBB	Croplands	Temperate	Croplands	4	wheat_Maize	35.16	114.42	68	13.6	0.4093	546.3	7.5	14.26	1.09	1.24359	31.71	11.4668
P90	90	F730-R1101	1	SRR10606276	Wei_2021_SBB	Croplands	Arid	Croplands	4	wheat_Maize	37.86	114.66	53	13.1	0.3252	493	8.06	26.66	1.51	1.37183	50.54	19.4339
P91	91	F730-R1101	1	SRR10606275	Wei_2021_SBB	Croplands	Arid	Croplands	4	wheat_Maize	37.82	114.7	46	13	0.3256	488.1	8.08	25.85	1.49	1.4245	105.17	18.1467
P92	92	F730-R1101	1	SRR10606273	Wei_2021_SBB	Croplands	Arid	Croplands	4	wheat_Maize	37.82	114.65	50	13.1	0.3291	491.5	8.25	21.92	1.31	1.40656	62.66	15.5841
P93	93	F730-R1101	1	SRR10606272	Wei_2021_SBB	Croplands	Arid	Croplands	4	wheat_Maize	37.86	114.64	52	13.3	0.3284	494.8	7.86	24.89	1.37	1.67985	54.9	14.8168
P94	94	F730-R1101	1	SRR10606271	Wei_2021_SBB	Croplands	Arid	Croplands	4	wheat_Maize	37.88	114.63	54	13.3	0.332	496.8	8.24	21.85	1.25	1.3328	48.25	16.3941
P95	95	F730-R1101	1	SRR10606270	Wei_2021_SBB	Croplands	Arid	Croplands	4	wheat_Maize	37.89	114.67	53	13.1	0.3285	493.1	8.34	23.52	1.32	1.87077	38.06	12.5724
P96	96	F730-R1101	1	SRR10606269	Wei_2021_SBB	Croplands	Arid	Croplands	4	wheat_Maize	37.86	114.7	51	13.1	0.3241	490	7.77	26.5	1.44	1.89948	57.16	13.9512
P97	97	F730-R1101	1	SRR10606268	Wei_2021_SBB	Croplands	Arid	Croplands	4	wheat_Maize	37.91	114.64	55	13.2	0.3259	496.7	7.47	22.02	1.28	1.23675	27.31	17.8047
P98	98	F730-R1101	1	SRR10606267	Wei_2021_SBB	Croplands	Arid	Croplands	4	wheat_Maize	37.91	114.73	53	13.1	0.3192	489.4	7.57	29.37	1.6	1.97481	114.27	14.8723
P99	99	F730-R1101	1	SRR10606266	Wei_2021_SBB	Croplands	Arid	Croplands	4	wheat_Maize	37.92	114.77	51	13	0.3167	487.3	8.3	23.06	1.34	1.23351	18.24	18.6946
P100	100	F730-R1101	1	SRR10606265	Wei_2021_SBB	Croplands	Arid	Croplands	4	wheat_Maize	37.91	114.75	52	13	0.318	488.3	8.42	18.74	1.23	1.18748	21.28	15.7813
P101	101	F730-R1101	1	SRR10606264	Wei_2021_SBB	Croplands	Arid	Croplands	4	wheat_Maize	37.87	114.69	51	13.1	0.3231	490.9	7.97	22.81	1.13	2.25459	42.04	10.1171
P102	102	F730-R1101	1	SRR10606262	Wei_2021_SBB	Croplands	Arid	Croplands	4	wheat_Maize	37.86	114.72	49	13	0.3235	488.7	7.96	27.31	1.45	0.91506	15.06	29.845
P103	103	F730-R1101	1	SRR10606304	Wei_2021_SBB	Croplands	Cold	Croplands	4	Maize	43.76	125.01	216	5.7	0.4936	608.6	5.89	26.28	1.23	0.82639	54.21	31.801
P104	104	F730-R1101	1	SRR10606303	Wei_2021_SBB	Croplands	Cold	Croplands	4	Maize	43.78	124.95	201	5.7	0.4858	608.5	6.82	31.25	1.43	0.7618	27.61	41.0213
P105	105	F730-R1101	1	SRR10606302	Wei_2021_SBB	Croplands	Cold	Croplands	4	Maize	43.81	124.91	204	5.7	0.4784	607.6	7.45	30.4	1.41	1.04084	27.54	29.2072
P106	106	F730-R1101	1	SRR10606301	Wei_2021_SBB	Croplands	Cold	Croplands	4	Maize	43.69	125	223	5.8	0.4993	616.2	5.47	27.49	1.21	0.27667	27.34	99.3602
P107	107	F730-R1101	1	SRR10606300	Wei_2021_SBB	Croplands	Cold	Croplands	4	Maize	43.66	124.98	223	5.9	0.502	618.9	5.8	25.75	1.2	0.38047	22.53	67.6794
P108	108	F730-R1101	1	SRR10606299	Wei_2021_SBB	Croplands	Cold	Croplands	4	Maize	43.64	124.97	225	5.7	0.5056	620.2	5.66	27.92	1.15	0.40464	22.82	68.9996
P109	109	F730-R1101	1	CRR147209	Liu_2021_SBB	Croplands	Temperate	Croplands	4	Maize	28.25	116.33	54	17.9417	1.2641	1656	4.60985	7.35021	0.935277	0.613015	8.92346	11.9903
P110	110	F730-R1101	1	CRR147210	Liu_2021_SBB	Croplands	Temperate	Croplands	4	Maize	28.25	116.33	54	17.9417	1.2641	1656	4.80596	7.60467	0.906007	0.550106	8.06083	13.824
P111	111	F730-R1101	1	CRR147211	Liu_2021_SBB	Croplands	Temperate	Croplands	4	Maize	28.25	116.33	54	17.9417	1.2641	1656	4.92822	7.45521	0.908977	0.52682	8.4659	14.1513
P112	112	F730-R1101	1	CRR147215	Liu_2021_SBB	Croplands	Temperate	Croplands	4	Maize	28.25	116.33	54	17.9417	1.2641	1656	4.37632	8.75982	0.911157	0.67796	34.811	12.9208
P113	113	F730-R1101	1	CRR147216	Liu_2021_SBB	Croplands	Temperate	Croplands	4	Maize	28.25	116.33	54	17.9417	1.2641	1656	4.41962	9.33959	1.07008	0.727236	35.7709	12.8426
P114	114	F730-R1101	1	CRR147217	Liu_2021_SBB	Croplands	Temperate	Croplands	4	Maize	28.25	116.33	54	17.9417	1.2641	1656	4.38495	8.7251	1.10345	0.794752	35.1485	10.9784
P115	115	F730-R1101	1	CRR147221	Liu_2021_SBB	Croplands	Temperate	Croplands	4	Maize	28.25	116.33	54	17.9417	1.2641	1656	6.17403	11.0999	1.38374	1.36945	224.548	8.10534
P116	116	F730-R1101	1	CRR147222	Liu_2021_SBB	Croplands	Temperate	Croplands	4	Maize	28.25	116.33	54	17.9417	1.2641	1656	6.2703	12.0881	1.3772	1.56515	249.42	7.72328
P117	117	F730-R1101	1	CRR147223	Liu_2021_SBB	Croplands	Temperate	Croplands	4	Maize	28.25	116.33	54	17.9417	1.2641	1656	6.23986	12.0224	1.34573	1.43041	229.479	8.40485
P118	118	F730-R1101	1	CRR147227	Liu_2021_SBB	Croplands	Temperate	Croplands	4	Maize	28.25	116.33	54	17.9417	1.2641	1656	5.59885	11.5925	1.47003	1.99135	212.064	5.82145
P119	119	F730-R1101	1	CRR147228	Liu_2021_SBB	Croplands	Temperate	Croplands	4	Maize	28.25	116.33	54	17.9417	1.2641	1656	5.61034	12.0605	1.277	2.06167	207.725	5.8499
P120	120	F730-R1101	1	CRR147229	Liu_2021_SBB	Croplands	Temperate	Croplands	4	Maize	28.25	116.33	54	17.9417	1.2641	1656	5.62076	11.2463	1.39456	2.10892	215.792	5.33276
P121	121	F733-R1083	2	ERR3152368	Graça_2021_EJSB	Grasslands	Temperate	Temperate_Grasslands	9	Not_recorded	53.6055	-6.65642	47	9.40833	1.2857	890	5.1	33	3.2	0.563	23	58.6146
P122	122	F733-R1083	2	ERR3152369	Graça_2021_EJSB	Grasslands	Temperate	Temperate_Grasslands	9	Not_recorded	54.0153	-9.42894	76	9.30417	1.9549	1261	6.6	38.3	3.2	0.858	31	44.6387
P123	123	F733-R1083	2	ERR3152370	Graça_2021_EJSB	Grasslands	Temperate	Temperate_Grasslands	9	Not_recorded	52.0598	-9.50694	39	10.3792	1.9104	1392	6.5	70.3	5.2	0.751	29	93.6085
P124	124	F733-R1083	2	ERR3152371	Graça_2021_EJSB	Grasslands	Temperate	Temperate_Grasslands	9	Not_recorded	53.6279	-8.18856	52	9.58333	1.5961	1102	5.5	42.6	4.6	0.819	33	52.0147
P125	125	F733-R1083	2	ERR3152372	Graça_2021_EJSB	Grasslands	Temperate	Temperate_Grasslands	9	Not_recorded	52.32	-6.45618	19	10.3583	1.3074	950	5.9	56.6	5.5	1.171	34	48.3348
P126	126	F733-R1083	2	ERR3152373	Graça_2021_EJSB	Grasslands	Temperate	Temperate_Grasslands	9	Not_recorded	54.01	-9.42953	76	9.30417	1.9549	1261	6.5	58.2	5.7	1.182	42	49.2386
P127	127	F733-R1083	2	ERR3152374	Graça_2021_EJSB	Grasslands	Temperate	Temperate_Grasslands	9	Not_recorded	53.2729	-9.05349	7	10.275	1.5008	1105	6.7	56.4	4.2	0.55	30	102.545
P128	128	F733-R1083	2	ERR3152375	Graça_2021_EJSB	Grasslands	Temperate	Temperate_Grasslands	9	Not_recorded	51.9029	-8.47512	28	10.4375	1.4201	1032	6.4	43.2	4.1	1.044	57	41.3793
P129	129	F733-R1083	2	ERR3152376	Graça_2021_EJSB	Grasslands	Temperate	Temperate_Grasslands	9	Not_recorded	52.6674	-7.24222	61	9.87083	1.2207	887	5.7	51	5	1.573	49	32.4221
P130	130	F733-R1083	2	ERR3152377	Graça_2021_EJSB	Grasslands	Temperate	Temperate_Grasslands	9	Not_recorded	54.0329	-9.44511	102	9.2125	1.9745	1297	6.5	53.4	4.4	0.979	52	54.5455
P131	131	F733-R1083	2	ERR3152378	Graça_2021_EJSB	Grasslands	Temperate	Temperate_Grasslands	9	Not_recorded	52.3355	-6.46586	12	10.3583	1.3264	953	5.5	69	6.5	0.492	165	140.244
P132	132	F733-R1083	2	ERR3152379	Graça_2021_EJSB	Grasslands	Temperate	Temperate_Grasslands	9	Not_recorded	52.502	-8.18447	97	9.63333	1.5312	1118	5	75.7	6.8	0.824	25	91.8689
P133	133	F733-R1083	2	ERR3152380	Graça_2021_EJSB	Grasslands	Temperate	Temperate_Grasslands	9	Not_recorded	52.3223	-6.47661	68	10.1917	1.388	1023	5.6	40.6	4	0.706	33	57.5071
P134	134	F733-R1083	2	ERR3152381	Graça_2021_EJSB	Grasslands	Temperate	Temperate_Grasslands	9	Not_recorded	52.2698	-7.11777	48	10.2	1.3048	953	6.2	49.4	4.1	0.447	24	110.515
P135	135	F733-R1083	2	ERR3152382	Graça_2021_EJSB	Grasslands	Temperate	Temperate_Grasslands	9	Not_recorded	51.8614	-8.47012	96	10.0042	1.6044	1133	5.1	53.4	5	0.672	33	79.4643
P136	136	F733-R1083	2	ERR3152383	Graça_2021_EJSB	Grasslands	Temperate	Temperate_Grasslands	9	Not_recorded	51.9074	-8.5223	105	9.9625	1.5966	1133	5.7	59.6	4.6	0.882	48	67.5737
P137	137	F733-R1083	2	ERR3152384	Graça_2021_EJSB	Grasslands	Temperate	Temperate_Grasslands	9	Not_recorded	52.0564	-9.52875	24	10.4375	1.927	1405	5.8	72.4	5.7	0.813	32	89.0529
P138	138	F733-R1083	2	ERR3152385	Graça_2021_EJSB	Grasslands	Temperate	Temperate_Grasslands	9	Not_recorded	53.9638	-6.58527	41	9.3875	1.4312	994	6.8	48.1	3.8	0.678	56	70.944
P139	139	F733-R1083	2	ERR3152386	Graça_2021_EJSB	Grasslands	Temperate	Temperate_Grasslands	9	Not_recorded	53.9579	-7.28325	161	8.86667	1.9494	1320	6.3	51.6	4.2	0.462	34	111.688
P140	140	F733-R1083	2	ERR3152387	Graça_2021_EJSB	Grasslands	Temperate	Temperate_Grasslands	9	Not_recorded	52.3178	-6.4603	56	10.225	1.3587	996	5.8	62.3	5.9	0.779	411	79.9743
P141	141	F730-R1101	1	P11	Lang_2022_Fron_Micro	Croplands	Temperate	Croplands	4	maize	29.9831	102.982	632	17.0958	1.4599	1608	6.53446	17.5011	1.70088	0.0795504	58.3374	220
P142	142	F730-R1101	1	P12	Lang_2022_Fron_Micro	Croplands	Temperate	Croplands	4	maize	29.9831	102.982	632	17.0958	1.4599	1608	6.50191	17.624	1.70465	0.0787346	56.9538	223.841
P143	143	F730-R1101	1	P13	Lang_2022_Fron_Micro	Croplands	Temperate	Croplands	4	maize	29.9831	102.982	632	17.0958	1.4599	1608	6.54585	17.5638	1.71158	0.0783613	54.9592	224.139
P144	144	F730-R1101	1	P21	Lang_2022_Fron_Micro	Croplands	Temperate	Croplands	4	maize	29.9831	102.982	632	17.0958	1.4599	1608	6.57878	17.4248	1.84947	0.0888953	69.4814	196.015
P145	145	F730-R1101	1	P22	Lang_2022_Fron_Micro	Croplands	Temperate	Croplands	4	maize	29.9831	102.982	632	17.0958	1.4599	1608	6.62991	18.3891	1.7861	0.117222	71.9045	156.874
P146	146	F730-R1101	1	P23	Lang_2022_Fron_Micro	Croplands	Temperate	Croplands	4	maize	29.9831	102.982	632	17.0958	1.4599	1608	6.56037	18.3619	1.83296	0.0878668	65.4918	208.974
P147	147	F730-R1101	1	P31	Lang_2022_Fron_Micro	Croplands	Temperate	Croplands	4	maize	29.9831	102.982	632	17.0958	1.4599	1608	6.13971	21.1259	2.09683	0.20021	130.195	105.519
P148	148	F730-R1101	1	P32	Lang_2022_Fron_Micro	Croplands	Temperate	Croplands	4	maize	29.9831	102.982	632	17.0958	1.4599	1608	6.10443	20.4559	2.02678	0.204801	124.18	99.882
P149	149	F730-R1101	1	P33	Lang_2022_Fron_Micro	Croplands	Temperate	Croplands	4	maize	29.9831	102.982	632	17.0958	1.4599	1608	5.92043	21.081	2.09562	0.20442	126.799	103.126
P150	150	F730-R1101	1	P41	Lang_2022_Fron_Micro	Croplands	Temperate	Croplands	4	maize	29.9831	102.982	632	17.0958	1.4599	1608	5.75488	22.0867	2.14705	0.219582	156.284	100.585
P151	151	F730-R1101	1	P42	Lang_2022_Fron_Micro	Croplands	Temperate	Croplands	4	maize	29.9831	102.982	632	17.0958	1.4599	1608	5.73655	21.906	2.09649	0.222594	154.92	98.4125
P152	152	F730-R1101	1	P43	Lang_2022_Fron_Micro	Croplands	Temperate	Croplands	4	maize	29.9831	102.982	632	17.0958	1.4599	1608	5.75275	22.0681	2.11129	0.218711	153.708	100.901
P153	153	F730-R1101	1	P51	Lang_2022_Fron_Micro	Croplands	Temperate	Croplands	4	maize	29.9831	102.982	632	17.0958	1.4599	1608	5.82424	4.91716	2.2307	0.2289	56.1148	21.4817
P154	154	F730-R1101	1	P52	Lang_2022_Fron_Micro	Croplands	Temperate	Croplands	4	maize	29.9831	102.982	632	17.0958	1.4599	1608	5.73405	4.75659	2.23295	0.225309	52.686	21.1114
P155	155	F730-R1101	1	P53	Lang_2022_Fron_Micro	Croplands	Temperate	Croplands	4	maize	29.9831	102.982	632	17.0958	1.4599	1608	5.79387	4.92458	2.23442	0.226139	53.6758	21.7768
P156	156	F730-R1101	1	SRR11625580	Wan_2021_STOTEN	Croplands	Cold	Croplands	4	Wheat-soybean-maize	45.67	126.62	175	4.4	0.4693	532	7.09169	14.6737	1.26503	1.37647	0.0723028	10.6604
P157	157	F730-R1101	1	SRR11625574	Wan_2021_STOTEN	Croplands	Cold	Croplands	4	Wheat-soybean-maize	45.67	126.64	170	4.41667	0.4626	524	7.12727	16.0957	1.41743	1.24758	0.23692	12.9015
P158	158	F730-R1101	1	SRR11625563	Wan_2021_STOTEN	Croplands	Cold	Croplands	4	Wheat-soybean-maize	45.67	126.66	157	4.375	0.4618	523	7.20401	18.8634	1.4979	1.25685	0.210361	15.0085
P159	159	F730-R1101	1	SRR11625555	Wan_2021_STOTEN	Croplands	Cold	Croplands	4	Wheat-soybean-maize	45.67	126.68	173	4.2375	0.4705	532	7.07993	15.6914	1.5	1.4924	0.06	10.5142
P160	160	F730-R1101	1	SRR11625554	Wan_2021_STOTEN	Croplands	Cold	Croplands	4	Wheat-soybean-maize	45.67	126.7	169	4.17917	0.4741	535	6.99222	15.5813	1.5	1.46502	0.06	10.6355
P161	161	F730-R1101	1	SRR11625579	Wan_2021_STOTEN	Croplands	Cold	Croplands	4	Wheat-soybean-maize	45.67	126.72	168	4.1125	0.4753	535	7.05319	15.7824	1.5	1.73082	0.06	9.11841
P162	162	F730-R1101	1	SRR11625578	Wan_2021_STOTEN	Croplands	Cold	Croplands	4	Wheat-soybean-maize	45.67	126.74	161	4.1	0.4757	535	5.33801	15.8659	1.52668	1.1775	0.131049	13.4742
P163	163	F730-R1101	1	SRR11625577	Wan_2021_STOTEN	Croplands	Cold	Croplands	4	Wheat-soybean-maize	45.67	126.76	168	4.05417	0.4783	537	5.73851	15.5221	1.61106	1.1977	0.137128	12.9599
P164	164	F730-R1101	1	SRR11625576	Wan_2021_STOTEN	Croplands	Cold	Croplands	4	Wheat-soybean-maize	45.67	126.78	171	4.025	0.4762	535	5.293	14.8405	1.74163	1.46701	0.131288	10.1162
P165	165	F730-R1101	1	SRR11625575	Wan_2021_STOTEN	Croplands	Temperate	Croplands	4	maize_wheat	36.9	120.7	28	12.3375	0.5314	726	7.76217	4.45705	0.743454	1.01874	0.06	4.37505
P166	166	F730-R1101	1	SRR11625573	Wan_2021_STOTEN	Croplands	Temperate	Croplands	4	maize_wheat	36.9	120.9	95	12.1583	0.5257	724	7.89588	4.64983	0.61439	1.42959	0.06	3.25255
P167	167	F730-R1101	1	SRR11625572	Wan_2021_STOTEN	Croplands	Temperate	Croplands	4	maize_wheat	36.9	120.11	79	12.2708	0.4908	686	7.99665	2.79765	0.5811	1.44027	0.06	1.94245
P168	168	F730-R1101	1	SRR11625571	Wan_2021_STOTEN	Croplands	Temperate	Croplands	4	maize_wheat	36.9	120.13	85	12.2542	0.4922	688	7.40978	16.2649	1.63379	2.64171	0.298551	6.15697
P169	169	F730-R1101	1	SRR11625569	Wan_2021_STOTEN	Croplands	Temperate	Croplands	4	maize_wheat	36.9	120.15	210	11.7583	0.5027	701	7.36761	15.7046	1.55744	2.73934	0.323311	5.733
P170	170	F730-R1101	1	SRR11625570	Wan_2021_STOTEN	Croplands	Temperate	Croplands	4	maize_wheat	36.9	120.17	130	12.075	0.499	695	7.38148	15.3182	1.83751	2.54835	0.273984	6.01101
P171	171	F730-R1101	1	SRR11625568	Wan_2021_STOTEN	Croplands	Temperate	Croplands	4	maize_wheat	36.9	120.19	109	12.1167	0.4983	694	7.41484	6.32901	0.8	1.61448	0.08	3.92015
P172	172	F730-R1101	1	SRR11625567	Wan_2021_STOTEN	Croplands	Temperate	Croplands	4	maize_wheat	36.9	120.21	79	12.1833	0.499	691	7.31784	5.6331	0.8	1.51708	0.08	3.71312
P173	173	F730-R1101	1	SRR11625566	Wan_2021_STOTEN	Croplands	Temperate	Croplands	4	maize_wheat	36.9	120.23	73	12.2	0.4993	691	7.42242	5.31731	0.8	1.55313	0.08	3.42362
P174	174	F730-R1101	1	SRR11625565	Wan_2021_STOTEN	Croplands	Temperate	Croplands	4	maize_wheat	26.75	111.87	195	17.8125	1.1678	1375	6.86299	5.1521	1.1	1.41318	0.0968867	3.64576
P175	175	F730-R1101	1	SRR11625564	Wan_2021_STOTEN	Croplands	Temperate	Croplands	4	maize_wheat	26.75	111.89	212	17.7167	1.1838	1380	6.84138	6.42861	1.1	1.34027	0.0738019	4.7965
P176	176	F730-R1101	1	SRR11625562	Wan_2021_STOTEN	Croplands	Temperate	Croplands	4	maize_wheat	26.75	111.91	387	17.075	1.2507	1429	6.81712	6.66596	1.1	1.23423	0.0964462	5.40092
P177	177	F730-R1101	1	SRR11625561	Wan_2021_STOTEN	Croplands	Temperate	Croplands	4	maize_wheat	26.75	111.93	430	16.9542	1.2609	1447	6.57427	15.6789	2.1	1.68102	0.0875785	9.32704
P178	178	F730-R1101	1	SRR11625560	Wan_2021_STOTEN	Croplands	Temperate	Croplands	4	maize_wheat	26.75	111.95	166	17.875	1.1946	1389	6.60834	15.1019	2.1	1.6982	0.0972719	8.89284
P179	179	F730-R1101	1	SRR11625558	Wan_2021_STOTEN	Croplands	Temperate	Croplands	4	maize_wheat	26.75	111.97	156	17.9625	1.1836	1389	6.49775	15.6287	2.1	1.77991	0.0962744	8.78063
P180	180	F730-R1101	1	SRR11625559	Wan_2021_STOTEN	Croplands	Temperate	Croplands	4	maize_wheat	26.75	111.99	163	17.9792	1.1788	1391	4.88779	10.3631	1.5	1.48042	0.06	7.0001
P181	181	F730-R1101	1	SRR11625557	Wan_2021_STOTEN	Croplands	Temperate	Croplands	4	maize_wheat	26.75	111.101	260	17.3667	1.1878	1374	4.81951	9.39767	1.5	1.74995	0.06	5.37026
P182	182	F730-R1101	1	SRR11625556	Wan_2021_STOTEN	Croplands	Temperate	Croplands	4	maize_wheat	26.75	111.103	260	17.3667	1.1878	1374	4.80064	9.94229	1.5	1.68332	0.06	5.90636
P183	183	F730-R1101	1	SRR17638768	Neha_2023_Plants	Croplands	Temperate	Croplands	4	Rice_wheat	25.15	83.57	76	26.3417	0.4869	979	7.5	8.83713	1.07	0.12708	6.5	69.5399
P184	184	F730-R1101	1	SRR17638769	Neha_2023_Plants	Croplands	Temperate	Croplands	4	Rice_wheat	25.15	83.57	76	26.3417	0.4869	979	7.666	8.57713	1.07	0.15217	3.8	56.3655
P185	185	F730-R1101	1	SRR17638770	Neha_2023_Plants	Croplands	Temperate	Croplands	4	Rice_wheat	25.15	83.57	76	26.3417	0.4869	979	7.5	8.97038	1.07	0.12708	6.6	70.5885
P186	186	F730-R1101	1	SRR17638771	Neha_2023_Plants	Croplands	Temperate	Croplands	4	Rice_wheat	25.15	83.57	76	26.3417	0.4869	979	7.5	8.61268	1.07	0.15217	4.2	56.599
P187	187	F730-R1101	1	SRR17638772	Neha_2023_Plants	Croplands	Temperate	Croplands	4	Rice_wheat	25.15	83.57	76	26.3417	0.4869	979	7.5	9.69199	1.07	0.12708	6.6	76.2669
P188	188	F730-R1101	1	SRR17638773	Neha_2023_Plants	Croplands	Temperate	Croplands	4	Rice_wheat	25.15	83.57	76	26.3417	0.4869	979	7.5	10.0206	1.07	0.15217	4.1	65.8513
P189	189	F730-R1101	1	SRR17638774	Neha_2023_Plants	Croplands	Temperate	Croplands	4	Rice_wheat	25.15	83.57	76	26.3417	0.4869	979	7.5	9.33539	1.07	0.12708	6.55	73.4607
P190	190	F730-R1101	1	SRR17638775	Neha_2023_Plants	Croplands	Temperate	Croplands	4	Rice_wheat	25.15	83.57	76	26.3417	0.4869	979	7.5	9.47823	1.07	0.15217	4.05	62.2871
P191	191	F733-R1083	2	SRR12472247	Gaiero_2021_FEMS_Micro_Eco	Forests	Temperate	Temperate_Forests	8	conifers	-43.492	169.043	22	11.155	3	115.13	4.71062	35.0092	3.68982	0.0998067	5.19583	350.77
P192	192	F733-R1083	2	SRR12472248	Gaiero_2021_FEMS_Micro_Eco	Forests	Temperate	Temperate_Forests	8	conifers	-43.492	169.043	22	11.155	3	115.13	4.19461	62.0928	2.57198	0.0998067	4.13499	622.131
P193	193	F733-R1083	2	SRR12472249	Gaiero_2021_FEMS_Micro_Eco	Forests	Temperate	Temperate_Forests	8	conifers	-43.492	169.043	22	11.155	3	115.13	4.44516	28.4766	3.59155	0.0998067	5.06873	285.318
P194	194	F733-R1083	2	SRR12472250	Gaiero_2021_FEMS_Micro_Eco	Forests	Temperate	Temperate_Forests	8	conifers	-43.492	169.043	22	11.155	3	115.13	4.80853	33.5914	2.2976	0.140924	6.81221	238.365
P195	195	F733-R1083	2	SRR12472251	Gaiero_2021_FEMS_Micro_Eco	Forests	Temperate	Temperate_Forests	8	conifers	-43.492	169.043	22	11.155	3	115.13	4.68987	23.1123	2.25668	0.140924	6.85555	164.005
P196	196	F733-R1083	2	SRR12472252	Gaiero_2021_FEMS_Micro_Eco	Forests	Temperate	Temperate_Forests	8	conifers	-43.492	169.043	22	11.155	3	115.13	4.58427	19.6727	1.95382	0.140924	6.59581	139.597
P197	197	F733-R1083	2	SRR12472253	Gaiero_2021_FEMS_Micro_Eco	Forests	Temperate	Temperate_Forests	8	conifers	-43.492	169.043	22	11.155	3	115.13	3.99264	43.6791	1.73547	0.212023	3.82853	206.012
P198	198	F733-R1083	2	SRR12472254	Gaiero_2021_FEMS_Micro_Eco	Forests	Temperate	Temperate_Forests	8	conifers	-43.492	169.043	22	11.155	3	115.13	4.49809	37.2843	2.14767	0.212023	5.63671	175.851
P199	199	F733-R1083	2	SRR12472258	Gaiero_2021_FEMS_Micro_Eco	Forests	Temperate	Temperate_Forests	8	conifers	-43.492	169.043	22	11.155	3	115.13	3.71354	41.1707	1.88063	0.212023	8.20245	194.181
P200	200	F733-R1083	2	SRR12472259	Gaiero_2021_FEMS_Micro_Eco	Forests	Temperate	Temperate_Forests	8	conifers	-43.492	169.043	22	11.155	3	115.13	4.22406	52.1202	3.91966	0.23055	4.59981	226.069
P201	201	F733-R1083	2	SRR12472260	Gaiero_2021_FEMS_Micro_Eco	Forests	Temperate	Temperate_Forests	8	conifers	-43.492	169.043	22	11.155	3	115.13	3.97422	48.2854	3.27148	0.23055	5.95571	209.436
P202	202	F733-R1083	2	SRR12472261	Gaiero_2021_FEMS_Micro_Eco	Forests	Temperate	Temperate_Forests	8	conifers	-43.492	169.043	22	11.155	3	115.13	4.03307	53.0885	2.2547	0.23055	6.03171	230.269
P203	203	F733-R1083	2	SRR12472262	Gaiero_2021_FEMS_Micro_Eco	Forests	Temperate	Temperate_Forests	8	conifers	-43.492	169.043	22	11.155	3	115.13	4.0506	51.3316	4.71278	0.193495	6.389	265.286
P204	204	F733-R1083	2	SRR12472263	Gaiero_2021_FEMS_Micro_Eco	Forests	Temperate	Temperate_Forests	8	conifers	-43.492	169.043	22	11.155	3	115.13	3.9524	54.12	1.78939	0.193495	4.13346	279.697
P205	205	F733-R1083	2	SRR12472264	Gaiero_2021_FEMS_Micro_Eco	Forests	Temperate	Temperate_Forests	8	conifers	-43.492	169.043	22	11.155	3	115.13	3.91023	91.2944	1.66991	0.193495	2.52102	471.817
P206	206	F733-R1083	2	SRR12472265	Gaiero_2021_FEMS_Micro_Eco	Forests	Temperate	Temperate_Forests	8	conifers	-43.492	169.043	22	11.155	3	115.13	4.02353	2.0173	3.90239	0.308369	2.17032	6.54184
P207	207	F733-R1083	2	SRR12472266	Gaiero_2021_FEMS_Micro_Eco	Forests	Temperate	Temperate_Forests	8	conifers	-43.492	169.043	22	11.155	3	115.13	4.17099	8.93107	14.544	0.3084	8.87637	28.9594
P208	208	F733-R1083	2	SRR12472267	Gaiero_2021_FEMS_Micro_Eco	Forests	Temperate	Temperate_Forests	8	conifers	-43.492	169.043	22	11.155	3	115.13	3.98606	175.744	4.4033	0.31	6.11991	566.915
P209	209	F733-R1083	2	CNS0094957	Liu_2020_SBB	Croplands	Arid	Croplands	4	Wheat	34.2997	108.07	521	12.675	0.5243	653	7.94254	8.83713	1.07	0.623788	5.44918	14.1669
P210	210	F733-R1083	2	CNS0094958	Liu_2020_SBB	Croplands	Arid	Croplands	4	Wheat	34.2997	108.07	521	12.675	0.5243	653	7.91604	8.57713	1.07	0.633226	5.1049	13.5451
P211	211	F733-R1083	2	CNS0094959	Liu_2020_SBB	Croplands	Arid	Croplands	4	Wheat	34.2997	108.07	521	12.675	0.5243	653	7.89615	8.97038	1.07	0.6399	5.22918	14.0184
P212	212	F733-R1083	2	CNS0094960	Liu_2020_SBB	Croplands	Arid	Croplands	4	Wheat	34.2997	108.07	521	12.675	0.5243	653	7.91101	8.61268	1.07	0.635295	5.09247	13.557
P213	213	F733-R1083	2	CNS0094961	Liu_2020_SBB	Croplands	Arid	Croplands	4	Wheat	34.2997	108.07	521	12.675	0.5243	653	7.93254	9.69199	1.07	0.727951	36.101	13.3141
P214	214	F733-R1083	2	CNS0094962	Liu_2020_SBB	Croplands	Arid	Croplands	4	Wheat	34.2997	108.07	521	12.675	0.5243	653	8.02957	10.0206	1.07	0.70975	44.7518	14.1185
P215	215	F733-R1083	2	CNS0094963	Liu_2020_SBB	Croplands	Arid	Croplands	4	Wheat	34.2997	108.07	521	12.675	0.5243	653	8.01876	9.33539	1.07	0.695261	37.8132	13.4272
P216	216	F733-R1083	2	CNS0094964	Liu_2020_SBB	Croplands	Arid	Croplands	4	Wheat	34.2997	108.07	521	12.675	0.5243	653	7.92958	9.47823	1.07	0.697614	35.5039	13.5866
P217	217	F733-R1083	2	CNS0094965	Liu_2020_SBB	Croplands	Arid	Croplands	4	Wheat	34.2997	108.07	521	12.675	0.5243	653	8.03928	9.33982	1.07	0.822877	46.7924	11.3502
P218	218	F733-R1083	2	CNS0094966	Liu_2020_SBB	Croplands	Arid	Croplands	4	Wheat	34.2997	108.07	521	12.675	0.5243	653	8.10187	9.54786	1.07	0.731226	54.9369	13.0573
P219	219	F733-R1083	2	CNS0094967	Liu_2020_SBB	Croplands	Arid	Croplands	4	Wheat	34.2997	108.07	521	12.675	0.5243	653	8.05348	9.63455	1.07	0.742325	45.5887	12.9789
P220	220	F733-R1083	2	CNS0094968	Liu_2020_SBB	Croplands	Arid	Croplands	4	Wheat	34.2997	108.07	521	12.675	0.5243	653	8.07739	9.73466	1.07	0.749973	42.3635	12.98
P221	221	F733-R1083	2	CNS0094969	Liu_2020_SBB	Croplands	Arid	Croplands	4	Wheat	34.2997	108.07	521	12.675	0.5243	653	8.00237	9.39423	1.07	0.744508	54.0776	12.618
P222	222	F733-R1083	2	CNS0094970	Liu_2020_SBB	Croplands	Arid	Croplands	4	Wheat	34.2997	108.07	521	12.675	0.5243	653	8.00977	9.15059	1.07	0.742582	53.7036	12.3227
P223	223	F733-R1083	2	CNS0094971	Liu_2020_SBB	Croplands	Arid	Croplands	4	Wheat	34.2997	108.07	521	12.675	0.5243	653	8.01559	9.51697	1.07	0.688573	52.7363	13.8213
P224	224	F733-R1083	2	CNS0094972	Liu_2020_SBB	Croplands	Arid	Croplands	4	Wheat	34.2997	108.07	521	12.675	0.5243	653	8.01063	9.63915	1.07	0.768381	52.0696	12.5448
P225	225	F733-R1083	2	CNS0094973	Liu_2020_SBB	Croplands	Arid	Croplands	4	Wheat	34.2997	108.07	521	12.675	0.5243	653	7.93951	9.10054	1.07	0.849533	52.8773	10.7124
P226	226	F733-R1083	2	CNS0094974	Liu_2020_SBB	Croplands	Arid	Croplands	4	Wheat	34.2997	108.07	521	12.675	0.5243	653	7.97582	8.90744	1.07	0.844239	51.2514	10.5508
P227	227	F733-R1083	2	CNS0094975	Liu_2020_SBB	Croplands	Arid	Croplands	4	Wheat	34.2997	108.07	521	12.675	0.5243	653	7.90846	9.42735	1.07	0.834033	48.5198	11.3033
P228	228	F733-R1083	2	CNS0094976	Liu_2020_SBB	Croplands	Arid	Croplands	4	Wheat	34.2997	108.07	521	12.675	0.5243	653	7.88037	9.16189	1.07	0.821026	47.8566	11.1591
P229	229	F730-R1101	1	SRR10662763	Liu_2021_BFS	Croplands	Temperate	Croplands	4	Maize	26.15	105.46	1337	14.9625	1.0887	1215	8.27	36.7	2.8	0.487	4	75.3593
P230	230	F730-R1101	1	SRR10662762	Liu_2021_BFS	Croplands	Temperate	Croplands	4	Maize	26.15	105.46	1337	14.9625	1.0887	1215	8.27	36.7	2.8	0.487	4	75.3593
P231	231	F730-R1101	1	SRR10662751	Liu_2021_BFS	Croplands	Temperate	Croplands	4	Maize	26.15	105.46	1337	14.9625	1.0887	1215	8.27	36.7	2.8	0.487	4	75.3593
P232	232	F730-R1101	1	SRR10662743	Liu_2021_BFS	Croplands	Temperate	Croplands	4	Maize	26.15	105.46	1337	14.9625	1.0887	1215	8.27	36.7	2.8	0.487	4	75.3593
P233	233	F730-R1101	1	SRR10662742	Liu_2021_BFS	Croplands	Temperate	Croplands	4	Maize	26.15	105.46	1337	14.9625	1.0887	1215	8.27	36.7	2.8	0.487	4	75.3593
P234	234	F730-R1101	1	SRR10662741	Liu_2021_BFS	Croplands	Temperate	Croplands	4	Maize	26.15	105.46	1337	14.9625	1.0887	1215	8.27	36.7	2.8	0.487	4	75.3593
P235	235	F730-R1101	1	SRR10662740	Liu_2021_BFS	Croplands	Temperate	Croplands	4	Maize	26.15	105.46	1337	14.9625	1.0887	1215	8.27	36.7	2.8	0.487	4	75.3593
P236	236	F730-R1101	1	SRR10662739	Liu_2021_BFS	Croplands	Temperate	Croplands	4	Maize	26.15	105.46	1337	14.9625	1.0887	1215	8.27	36.7	2.8	0.487	4	75.3593
P237	237	F730-R1101	1	SRR10662738	Liu_2021_BFS	Croplands	Temperate	Croplands	4	Maize	26.15	105.46	1337	14.9625	1.0887	1215	8.27	36.7	2.8	0.487	4	75.3593
P238	238	F730-R1101	1	SRR10662737	Liu_2021_BFS	Croplands	Temperate	Croplands	4	Maize	26.15	105.46	1337	14.9625	1.0887	1215	8.27	36.7	2.8	0.487	4	75.3593
P239	239	F730-R1101	1	SRR10662761	Liu_2021_BFS	Croplands	Temperate	Croplands	4	Maize	26.15	105.46	1337	14.9625	1.0887	1215	8.27	36.7	2.8	0.487	4	75.3593
P240	240	F730-R1101	1	SRR10662760	Liu_2021_BFS	Croplands	Temperate	Croplands	4	Maize	26.15	105.46	1337	14.9625	1.0887	1215	8.27	36.7	2.8	0.487	4	75.3593
P241	241	F730-R1101	1	SRR10662759	Liu_2021_BFS	Croplands	Temperate	Croplands	4	Maize	26.15	105.46	1337	14.9625	1.0887	1215	8.27	36.7	2.8	0.487	4	75.3593
P242	242	F730-R1101	1	SRR10662758	Liu_2021_BFS	Croplands	Temperate	Croplands	4	Maize	26.15	105.46	1337	14.9625	1.0887	1215	8.27	36.7	2.8	0.487	4	75.3593
P243	243	F730-R1101	1	SRR10662757	Liu_2021_BFS	Croplands	Temperate	Croplands	4	Maize	26.15	105.46	1337	14.9625	1.0887	1215	8.27	36.7	2.8	0.487	4	75.3593
P244	244	F730-R1101	1	SRR10662756	Liu_2021_BFS	Croplands	Temperate	Croplands	4	Maize	26.15	105.46	1337	14.9625	1.0887	1215	8.27	36.7	2.8	0.487	4	75.3593
P245	245	F730-R1101	1	SRR10662755	Liu_2021_BFS	Croplands	Temperate	Croplands	4	Maize	26.15	105.46	1337	14.9625	1.0887	1215	8.27	36.7	2.8	0.487	4	75.3593
P246	246	F730-R1101	1	SRR10662754	Liu_2021_BFS	Croplands	Temperate	Croplands	4	Maize	26.15	105.46	1337	14.9625	1.0887	1215	8.27	36.7	2.8	0.487	4	75.3593
P247	247	F730-R1101	1	SRR10662753	Liu_2021_BFS	Croplands	Temperate	Croplands	4	Maize	26.15	105.46	1337	14.9625	1.0887	1215	8.27	36.7	2.8	0.487	4	75.3593
P248	248	F730-R1101	1	SRR10662752	Liu_2021_BFS	Croplands	Temperate	Croplands	4	Maize	26.15	105.46	1337	14.9625	1.0887	1215	8.27	36.7	2.8	0.487	4	75.3593
P249	249	F730-R1101	1	SRR10662750	Liu_2021_BFS	Croplands	Temperate	Croplands	4	Maize	26.15	105.46	1337	14.9625	1.0887	1215	8.27	36.7	2.8	0.487	4	75.3593
P250	250	F730-R1101	1	SRR10662749	Liu_2021_BFS	Croplands	Temperate	Croplands	4	Maize	26.15	105.46	1337	14.9625	1.0887	1215	8.27	36.7	2.8	0.487	4	75.3593
P251	251	F730-R1101	1	SRR10662748	Liu_2021_BFS	Croplands	Temperate	Croplands	4	Maize	26.15	105.46	1337	14.9625	1.0887	1215	8.27	36.7	2.8	0.487	4	75.3593
P252	252	F730-R1101	1	SRR10662747	Liu_2021_BFS	Croplands	Temperate	Croplands	4	Maize	26.15	105.46	1337	14.9625	1.0887	1215	8.27	36.7	2.8	0.487	4	75.3593
P253	253	F730-R1101	1	SRR10662746	Liu_2021_BFS	Croplands	Temperate	Croplands	4	Maize	26.15	105.46	1337	14.9625	1.0887	1215	8.27	36.7	2.8	0.487	4	75.3593
P254	254	F730-R1101	1	SRR10662745	Liu_2021_BFS	Croplands	Temperate	Croplands	4	Maize	26.15	105.46	1337	14.9625	1.0887	1215	8.27	36.7	2.8	0.487	4	75.3593
P255	255	F730-R1101	1	SRR10662744	Liu_2021_BFS	Croplands	Temperate	Croplands	4	Maize	26.15	105.46	1337	14.9625	1.0887	1215	8.27	36.7	2.8	0.487	4	75.3593
P256	256	F730-R1101	1	SRR11777065	Zheng_2021_EJSB	Croplands	Temperate	Croplands	4	maize_wheat	26.7628	111.87	131	18.0875	1.167	1373	5.23743	8.00432	1.02597	0.380622	1.95747	21.0296
P257	257	F730-R1101	1	SRR11777059	Zheng_2021_EJSB	Croplands	Temperate	Croplands	4	maize_wheat	26.7628	111.87	131	18.0875	1.167	1373	5.15894	7.75396	1.08207	0.426838	2.24738	18.1661
P258	258	F730-R1101	1	SRR11777048	Zheng_2021_EJSB	Croplands	Temperate	Croplands	4	maize_wheat	26.7628	111.87	131	18.0875	1.167	1373	5.27269	7.89957	1.06059	0.48162	2.02114	16.4021
P259	259	F730-R1101	1	SRR11777047	Zheng_2021_EJSB	Croplands	Temperate	Croplands	4	maize_wheat	26.7628	111.87	131	18.0875	1.167	1373	5.30151	8.44728	0.999792	0.546867	1.86421	15.4467
P260	260	F730-R1101	1	SRR11777061	Zheng_2021_EJSB	Croplands	Temperate	Croplands	4	maize_wheat	26.7628	111.87	131	18.0875	1.167	1373	3.54291	8.58039	1.30037	0.471243	1.45839	18.208
P261	261	F730-R1101	1	SRR11777060	Zheng_2021_EJSB	Croplands	Temperate	Croplands	4	maize_wheat	26.7628	111.87	131	18.0875	1.167	1373	3.6174	8.32639	1.44795	0.464597	1.35335	17.9217
P262	262	F730-R1101	1	SRR11777058	Zheng_2021_EJSB	Croplands	Temperate	Croplands	4	maize_wheat	26.7628	111.87	131	18.0875	1.167	1373	3.76958	8.76832	1.24262	0.452328	2.28472	19.3849
P263	263	F730-R1101	1	SRR11777057	Zheng_2021_EJSB	Croplands	Temperate	Croplands	4	maize_wheat	26.7628	111.87	131	18.0875	1.167	1373	3.64252	7.91873	1.44884	0.471991	1.85978	16.7773
P264	264	F730-R1101	1	SRR11777046	Zheng_2021_EJSB	Croplands	Temperate	Croplands	4	maize_wheat	26.7628	111.87	131	18.0875	1.167	1373	3.80929	10.7509	1.45417	1.26242	226.039	8.51607
P265	265	F730-R1101	1	SRR11777064	Zheng_2021_EJSB	Croplands	Temperate	Croplands	4	maize_wheat	26.7628	111.87	131	18.0875	1.167	1373	3.80642	11.1225	1.49496	1.13863	218.749	9.76828
P266	266	F730-R1101	1	SRR11777063	Zheng_2021_EJSB	Croplands	Temperate	Croplands	4	maize_wheat	26.7628	111.87	131	18.0875	1.167	1373	3.77066	10.9292	1.43658	1.25696	212.439	8.69495
P267	267	F730-R1101	1	SRR11777062	Zheng_2021_EJSB	Croplands	Temperate	Croplands	4	maize_wheat	26.7628	111.87	131	18.0875	1.167	1373	3.81822	10.7895	1.45976	1.18948	239.625	9.0708
P268	268	F730-R1101	1	SRR11777052	Zheng_2021_EJSB	Croplands	Temperate	Croplands	4	maize_wheat	26.7628	111.87	131	18.0875	1.167	1373	3.86736	11.5816	1.56185	1.2963	244.29	8.93439
P269	269	F730-R1101	1	SRR11777051	Zheng_2021_EJSB	Croplands	Temperate	Croplands	4	maize_wheat	26.7628	111.87	131	18.0875	1.167	1373	3.93307	11.6547	1.39723	1.26747	218.502	9.19524
P270	270	F730-R1101	1	SRR11777050	Zheng_2021_EJSB	Croplands	Temperate	Croplands	4	maize_wheat	26.7628	111.87	131	18.0875	1.167	1373	3.93157	11.5416	1.44768	1.24524	207.317	9.2686
P271	271	F730-R1101	1	SRR11777049	Zheng_2021_EJSB	Croplands	Temperate	Croplands	4	maize_wheat	26.7628	111.87	131	18.0875	1.167	1373	3.9797	11.6305	1.53026	1.26812	233.813	9.17141
P272	272	F730-R1101	1	SRR11777056	Zheng_2021_EJSB	Croplands	Temperate	Croplands	4	maize_wheat	26.7628	111.87	131	18.0875	1.167	1373	4.93793	9.824	1.25832	1.22391	174.874	8.02671
P273	273	F730-R1101	1	SRR11777054	Zheng_2021_EJSB	Croplands	Temperate	Croplands	4	maize_wheat	26.7628	111.87	131	18.0875	1.167	1373	5.03354	9.63697	1.18144	1.2478	160.623	7.72315
P274	274	F730-R1101	1	SRR11777055	Zheng_2021_EJSB	Croplands	Temperate	Croplands	4	maize_wheat	26.7628	111.87	131	18.0875	1.167	1373	4.88939	9.86998	1.19447	1.31395	176.087	7.51171
P275	275	F730-R1101	1	SRR11777053	Zheng_2021_EJSB	Croplands	Temperate	Croplands	4	maize_wheat	26.7628	111.87	131	18.0875	1.167	1373	4.94088	9.93456	1.23004	1.25858	159.826	7.89349
P276	276	F730-R1101	1	ERR1072495	Ragot_2015_FEMS	Croplands	Temperate	Croplands	4	Triticum sp.	-34.585	148.635	585	13.8917	0.47	747	5.6	59.6	3.9	0.927	22.096	64.2934
P277	277	F730-R1101	1	ERR1072502	Ragot_2015_FEMS	Forests	Temperate	Temperate_Forests	8	Eucalyptus blackelyi, E. macrorhyncha, Vulpia bromoides, Briza maxima	-34.6678	148.634	490	14.3	0.4382	705	5.5	52.6	2	0.47	13.1507	111.915
P278	278	F730-R1101	1	ERR738592	Ragot_2015_FEMS	Grasslands	Temperate	Temperate_Grasslands	9	Microlaena stipoides, Austrodanthonia sp., Elymus scaber, Themada triandra	-34.585	148.635	585	13.8917	0.47	747	4.8	22.8	1.3	0.261	9.05971	87.3563
P279	279	F730-R1101	1	ERR1072512	Ragot_2015_FEMS	Grasslands	Temperate	Temperate_Grasslands	9	Microlaena stipoides, Austrodanthonia sp., El. scaber, T. triandra	-34.585	148.635	585	13.8917	0.47	747	4.9	19.7	1.1	0.229	8.43335	86.0262
P280	280	F730-R1101	1	ERR1072503	Ragot_2015_FEMS	Forests	Temperate	Temperate_Forests	8	Eucalyptus albens	-34.805	148.583	510	14.275	0.5024	804	5.3	22.8	0.9	0.167	7.21976	136.527
P281	281	F730-R1101	1	ERR1072520	Ragot_2015_FEMS	Grasslands	Temperate	Temperate_Grasslands	9	Microlaena stipoides, Austrodanthonia sp., El. scaber	-34.805	148.583	510	14.275	0.5024	804	5	23.2	1.3	0.234	8.53122	99.1453
P282	282	F730-R1101	1	ERR1072513	Ragot_2015_FEMS	Grasslands	Temperate	Temperate_Grasslands	9	Microlaena stipoides, Austrodanthonia sp., Elymus scaber	-34.805	148.583	510	14.275	0.5024	804	4.9	21	1.2	0.211	8.08101	99.5261
P283	283	F730-R1101	1	ERR1072496	Ragot_2015_FEMS	Croplands	Temperate	Croplands	4	Triticum sp.	-30.2728	149.806	227	18.8708	0.3116	646	6.3	7.8	0.4	0.259	9.02057	30.1158
P284	284	F730-R1101	1	ERR1072504	Ragot_2015_FEMS	Forests	Temperate	Temperate_Forests	8	Enneapogon nigricans,E. melliodora, Callitris glaucephylla, Casuarina sp.	-30.2622	149.837	249	18.775	0.3151	650	5.8	28.5	1	0.235	8.55079	121.277
P285	285	F730-R1101	1	ERR738594	Ragot_2015_FEMS	Grasslands	Temperate	Temperate_Grasslands	9	Chrysocephalum sp., Themada sp., Festuca arundinacea	-30.2539	149.865	257	18.7042	0.3175	654	6.9	23.7	1.5	0.705	17.7506	33.617
P286	286	F730-R1101	1	ERR1072497	Ragot_2015_FEMS	Croplands	Arid	Croplands	4	Triticum sp.	-31.4314	147.066	167	18.9542	0.2276	484	5.4	16.3	1.1	0.616	16.0085	26.461
P287	287	F730-R1101	1	ERR1072505	Ragot_2015_FEMS	Forests	Arid	Arid_Forests	1	Acacia dealbata, A. longifolia	-31.5225	147.147	173	18.875	0.2373	504	6.4	20.1	1	0.5	13.7379	40.2
P288	288	F730-R1101	1	ERR1072514	Ragot_2015_FEMS	Grasslands	Arid	Arid_Grasslands	2	Mixed grasses and dicot plants	-31.4311	147.069	167	18.9625	0.227	483	5.7	15	0.9	0.466	13.0724	32.1888
P289	289	F730-R1101	1	ERR1072506	Ragot_2015_FEMS	Forests	Arid	Arid_Forests	1	Acacia dealbata, A. aneura, A. longifolia	-31.2681	142.289	262	19.1833	0.1009	252	7	3.7	0.2	0.167	7.21976	22.1557
P290	290	F730-R1101	1	ERR738596	Ragot_2015_FEMS	Grasslands	Arid	Arid_Grasslands	2	Mixed grasses and dicot plants	-31.2719	142.296	222	19.3125	0.0979	245	8.3	5	0.3	0.193	7.72868	25.9067
P291	291	F730-R1101	1	ERR1072498	Ragot_2015_FEMS	Croplands	Temperate	Croplands	4	Triticum sp.c	47.5028	7.53917	314	9.84167	0.8668	801	5.9	14.5	1.1	0.771	19.0425	18.8067
P292	292	F730-R1101	1	ERR1072507	Ragot_2015_FEMS	Forests	Temperate	Temperate_Forests	8	Fagus silvatica, Galium rotundifolium, Maianthemum bifolium	47.5081	7.53778	314	9.84167	0.8668	801	5.5	45.2	2.8	0.599	15.6757	75.4591
P293	293	F730-R1101	1	ERR1072515	Ragot_2015_FEMS	Grasslands	Temperate	Temperate_Grasslands	9	Winter ryegrass, Dactylis glomerata, Festuca rubra, Trifolium pratense	47.5025	7.54028	314	9.84167	0.8668	801	6.3	27.8	2.2	0.808	19.7667	34.4059
P294	294	F730-R1101	1	ERR1072499	Ragot_2015_FEMS	Croplands	Temperate	Croplands	4	Brassica napus	47.4422	8.68056	546	8.8625	1.2074	1073	7.4	39.9	3	1.373	30.826	29.0605
P295	295	F730-R1101	1	ERR1072508	Ragot_2015_FEMS	Forests	Temperate	Temperate_Forests	8	Fagus silvatica, Hedera helix,	47.4422	8.68083	546	8.8625	1.2074	1073	5.1	51.4	2.8	0.45	12.7592	114.222
P296	296	F730-R1101	1	ERR1072516	Ragot_2015_FEMS	Grasslands	Temperate	Temperate_Grasslands	9	Lolium perenne, Dactylis glomerata, Phleum pratense	47.4467	8.67778	546	8.8625	1.2074	1073	7.8	44.7	3.1	1.667	36.5808	26.8146
P297	297	F730-R1101	1	ERR1072500	Ragot_2015_FEMS	Croplands	Temperate	Croplands	4	Triticum sp.	47.43055555555555	8.52139	441	9.57917	1.162	1062	7	30.1	2.4	1.059	24.6798	28.423
P298	298	F730-R1101	1	ERR1072509	Ragot_2015_FEMS	Forests	Temperate	Temperate_Forests	8	Picea abies, Fagus sylvatica, Acer pseudoplatanus	47.4289	8.52556	449	9.54167	1.1661	1065	4.2	27.7	1.4	0.403	11.8392	68.7345
P299	299	F730-R1101	1	ERR1072517	Ragot_2015_FEMS	Grasslands	Temperate	Temperate_Grasslands	9	Agrostis capillaris, Plantago lanceolata, Lolium perenne	47.43083333333333	8.52139	441	9.57917	1.162	1062	7.4	44.4	3.4	0.932	22.1939	47.6395
P300	300	F730-R1101	1	ERR1072501	Ragot_2015_FEMS	Croplands	Temperate	Croplands	4	Triticum sp.	47.4292	8.49306	446	9.525	1.1804	1069	6	22	1.6	1	23.5249	22
P301	301	F730-R1101	1	ERR1072510	Ragot_2015_FEMS	Forests	Temperate	Temperate_Forests	8	Fagus silvatica, Acer pseudoplatanus	47.4297	8.49278	446	9.525	1.1804	1069	4.3	30.4	1.3	0.283	9.49034	107.42
P302	302	F730-R1101	1	ERR1072518	Ragot_2015_FEMS	Grasslands	Temperate	Temperate_Grasslands	9	Arrhenatherum elatius, Anthoxanthum odoratum, Holcus lanatus, Ranunculus acris	47.4292	8.49194	446	9.525	1.1804	1069	6.6	36.1	3	0.7	17.6527	51.5714
P303	303	F730-R1101	1	ERR738598	Ragot_2015_FEMS	Croplands	Temperate	Croplands	4	Triticum sp.	47.4264	8.51917	441	9.57917	1.162	1062	6	11	0.8	0.551	14.7362	19.9637
P304	304	F730-R1101	1	ERR1072511	Ragot_2015_FEMS	Forests	Temperate	Temperate_Forests	8	Fagus silvatica, Quercus rubra	47.4267	8.51972	441	9.57917	1.162	1062	4.4	32.3	1.7	0.301	9.84267	107.309
P305	305	F730-R1101	1	ERR1072519	Ragot_2015_FEMS	Grasslands	Temperate	Temperate_Grasslands	9	Anthoxanthum odoratum, Dactylis glomerata, Ranunculus acris	47.4267	8.51917	441	9.57917	1.162	1062	5.9	22.4	1.7	0.457	12.8962	49.0153
P306	306	F730-R1101	1	SRR10758062	Bai_2020_msystems	Glacier	Polar	Polar	6	Populus purdomii, Abies fabri	29.5724	102.001	2979	6.925	1.0437	873	4.89	81.11	2.12	0.79	33.58	102.671
P307	307	F730-R1101	1	SRR10758063	Bai_2020_msystems	Glacier	Polar	Polar	6	Populus purdomii, Picea brachytyla, Abies fabri	29.5711	101.999	2989	6.8625	1.0562	876	5.43	86.93	1.78	0.73	70.57	119.082
P308	308	F730-R1101	1	SRR10758064	Bai_2020_msystems	Glacier	Polar	Polar	6	Populus purdomii , Betula utilis, Picea brachytyla, Abies fabri	29.5697	101.998	2989	6.8625	1.0562	876	6.23	50.39	1.52	1.13	70.15	44.5929
P309	309	F730-R1101	1	SRR10758065	Bai_2020_msystems	Glacier	Polar	Polar	6	Populus purdomii , Betula utilis, Picea brachytyla, Abies fabri	29.5689	101.997	2989	6.8625	1.0562	876	6.8	48.99	1.46	1.04	42.43	47.1058
P310	310	F730-R1101	1	SRR10758066	Bai_2020_msystems	Glacier	Polar	Polar	6	Hippophae rhamnoides, Salix magnifica, Populus purdomii, Betula utilis, Picea brachytyla	29.5682	101.995	2989	6.8625	1.0562	876	7.33	28.72	1.17	0.99	68.62	29.0101
P311	311	F730-R1101	1	SRR10758067	Bai_2020_msystems	Glacier	Polar	Polar	6	Hippophae rhamnoides, Salix magnifica, Populus purdomii	29.567805555555555	101.995	2989	6.8625	1.0562	876	7.12	16.12	0.75	0.68	6.13	23.7059
P312	312	F730-R1101	1	SRR10758068	Bai_2020_msystems	Glacier	Polar	Polar	6	Astragalus adsurgens, Hippophae rhamnoides, Salix magnifica, Populus purdomii	29.5677	101.992	2989	6.8625	1.0562	876	7.82	9.56	0.5	0.21	4.18	45.5238
P313	313	F733-R1083	2	SRR12471031	Tian_2021_STOTEN	Forests	Temperate	Temperate_Forests	8	unknown	23.2428	113.641	45	21.6833	1.306	1700	4.90157	27.5342	3.4	2.20804	24.6395	12.4699
P314	314	F733-R1083	2	SRR12471030	Tian_2021_STOTEN	Forests	Temperate	Temperate_Forests	8	unknown	23.2428	113.641	45	21.6833	1.306	1700	4.966	27.5692	3.4	2.2036	28.6096	12.511
P315	315	F733-R1083	2	SRR12471043	Tian_2021_STOTEN	Forests	Temperate	Temperate_Forests	8	unknown	23.2428	113.641	45	21.6833	1.306	1700	4.97919	27.9903	3.4	2.23173	28.5669	12.542
P316	316	F733-R1083	2	SRR12471038	Tian_2021_STOTEN	Forests	Temperate	Temperate_Forests	8	unknown	23.2428	113.641	45	21.6833	1.306	1700	4.9213	27.4993	3.4	2.19035	27.1946	12.5547
P317	317	F733-R1083	2	SRR12471037	Tian_2021_STOTEN	Forests	Temperate	Temperate_Forests	8	unknown	23.2428	113.641	45	21.6833	1.306	1700	5.03698	26.8509	3.42	2.15068	29.3944	12.4849
P318	318	F733-R1083	2	SRR12471036	Tian_2021_STOTEN	Forests	Temperate	Temperate_Forests	8	unknown	23.2428	113.641	45	21.6833	1.306	1700	5.00919	27.7676	3.42	2.1444	31.7398	12.9489
P319	319	F733-R1083	2	SRR12471035	Tian_2021_STOTEN	Forests	Temperate	Temperate_Forests	8	unknown	23.2428	113.641	45	21.6833	1.306	1700	4.99067	26.8512	3.42	2.12296	31.7553	12.648
P320	320	F733-R1083	2	SRR12471034	Tian_2021_STOTEN	Forests	Temperate	Temperate_Forests	8	unknown	23.2428	113.641	45	21.6833	1.306	1700	5.012	27.2072	3.42	2.1198	29.6407	12.8348
P321	321	F733-R1083	2	SRR12471033	Tian_2021_STOTEN	Forests	Temperate	Temperate_Forests	8	unknown	23.2428	113.641	45	21.6833	1.306	1700	5.05898	29.5154	3.63947	2.32876	33.4933	12.6743
P322	322	F733-R1083	2	SRR12471032	Tian_2021_STOTEN	Forests	Temperate	Temperate_Forests	8	unknown	23.2428	113.641	45	21.6833	1.306	1700	5.00318	30.2191	3.32098	2.32011	32.8425	13.0249
P323	323	F733-R1083	2	SRR12471029	Tian_2021_STOTEN	Forests	Temperate	Temperate_Forests	8	unknown	23.2428	113.641	45	21.6833	1.306	1700	5.0166	29.5379	3.50029	2.32473	36.2008	12.706
P324	324	F733-R1083	2	SRR12471028	Tian_2021_STOTEN	Forests	Temperate	Temperate_Forests	8	unknown	23.2428	113.641	45	21.6833	1.306	1700	5.02486	29.0814	3.44922	2.31752	33.3184	12.5485
P325	325	F733-R1083	2	SRR11617605	Jiang_2022_ASE	Croplands	Cold	Croplands	4	Maize	43.32	124.23	142	6.61667	0.4639	576	7	43.9	7.9	2	42.15	21.95
P326	326	F733-R1083	2	SRR11617604	Jiang_2022_ASE	Croplands	Cold	Croplands	4	Maize	43.32	124.23	142	6.61667	0.4639	576	7	43.9	7.9	2	42.15	21.95
P327	327	F733-R1083	2	SRR11617602	Jiang_2022_ASE	Croplands	Cold	Croplands	4	Maize	43.32	124.23	142	6.61667	0.4639	576	7	43.9	7.9	2	42.15	21.95
P328	328	F733-R1083	2	SRR11617601	Jiang_2022_ASE	Croplands	Cold	Croplands	4	Maize	43.32	124.23	142	6.61667	0.4639	576	7	43.9	7.9	2	42.15	21.95
P329	329	F733-R1083	2	SRR11617618	Jiang_2022_ASE	Croplands	Cold	Croplands	4	Maize	43.32	124.23	142	6.61667	0.4639	576	7	43.9	7.9	2	66.06	21.95
P330	330	F733-R1083	2	SRR11617617	Jiang_2022_ASE	Croplands	Cold	Croplands	4	Maize	43.32	124.23	142	6.61667	0.4639	576	7	43.9	7.9	2	66.06	21.95
P331	331	F733-R1083	2	SRR11617616	Jiang_2022_ASE	Croplands	Cold	Croplands	4	Maize	43.32	124.23	142	6.61667	0.4639	576	7	43.9	7.9	2	66.06	21.95
P332	332	F733-R1083	2	SRR11617615	Jiang_2022_ASE	Croplands	Cold	Croplands	4	Maize	43.32	124.23	142	6.61667	0.4639	576	7	43.9	7.9	2	66.06	21.95
P333	333	F733-R1083	2	SRR11617613	Jiang_2022_ASE	Croplands	Cold	Croplands	4	Maize	43.32	124.23	142	6.61667	0.4639	576	7	43.9	7.9	2	61.96	21.95
P334	334	F733-R1083	2	SRR11617612	Jiang_2022_ASE	Croplands	Cold	Croplands	4	Maize	43.32	124.23	142	6.61667	0.4639	576	7	43.9	7.9	2	61.96	21.95
P335	335	F733-R1083	2	SRR11617611	Jiang_2022_ASE	Croplands	Cold	Croplands	4	Maize	43.32	124.23	142	6.61667	0.4639	576	7	43.9	7.9	2	61.96	21.95
P336	336	F733-R1083	2	SRR11617610	Jiang_2022_ASE	Croplands	Cold	Croplands	4	Maize	43.32	124.23	142	6.61667	0.4639	576	7	43.9	7.9	2	61.96	21.95
P337	337	F733-R1083	2	SRR11617609	Jiang_2022_ASE	Croplands	Cold	Croplands	4	Maize	43.32	124.23	142	6.61667	0.4639	576	7	43.9	7.9	2	54.13	21.95
P338	338	F733-R1083	2	SRR11617608	Jiang_2022_ASE	Croplands	Cold	Croplands	4	Maize	43.32	124.23	142	6.61667	0.4639	576	7	43.9	7.9	2	54.13	21.95
P339	339	F733-R1083	2	SRR11617607	Jiang_2022_ASE	Croplands	Cold	Croplands	4	Maize	43.32	124.23	142	6.61667	0.4639	576	7	43.9	7.9	2	54.13	21.95
P340	340	F733-R1083	2	SRR11617606	Jiang_2022_ASE	Croplands	Cold	Croplands	4	Maize	43.32	124.23	142	6.61667	0.4639	576	7	43.9	7.9	2	54.13	21.95
P341	341	F733-R1083	2	SRR11610921	Chen_2021_SBB	Forests	Temperate	Temperate_Forests	8	radiata pine and eucalypt	-43.6647	172.705	69	11.4542	0.7685	903	5.02461	41.6201	5.16938	0.44817	11.562	92.8667
P342	342	F733-R1083	2	SRR11610920	Chen_2021_SBB	Forests	Temperate	Temperate_Forests	8	radiata pine and eucalypt	-43.6647	172.705	69	11.4542	0.7685	903	5.11867	57.0588	4.10431	0.591327	25.6204	96.4927
P343	343	F733-R1083	2	SRR11610919	Chen_2021_SBB	Forests	Temperate	Temperate_Forests	8	radiata pine and eucalypt	-43.6647	172.705	69	11.4542	0.7685	903	4.82023	40.4785	2.94865	0.58571	24.6131	69.1101
P344	344	F733-R1083	2	SRR11610918	Chen_2021_SBB	Forests	Temperate	Temperate_Forests	8	radiata pine and eucalypt	-43.6647	172.705	69	11.4542	0.7685	903	5.01053	55.0735	3.70148	0.531428	21.8978	103.633
P345	345	F733-R1083	2	SRR11610912	Chen_2021_SBB	Forests	Temperate	Temperate_Forests	8	radiata pine and eucalypt	-43.6647	172.705	69	11.4542	0.7685	903	4.78023	37.1698	2.79084	0.478231	18.5693	77.7234
P346	346	F733-R1083	2	SRR11610911	Chen_2021_SBB	Forests	Temperate	Temperate_Forests	8	radiata pine and eucalypt	-43.6647	172.705	69	11.4542	0.7685	903	4.9068	32.1899	3.29624	0.502949	22.3358	64.0022
P347	347	F733-R1083	2	SRR11610910	Chen_2021_SBB	Forests	Temperate	Temperate_Forests	8	radiata pine and eucalypt	-43.6647	172.705	69	11.4542	0.7685	903	4.83905	27.8044	1.98691	0.532889	19.927	52.1767
P348	348	F733-R1083	2	SRR11610909	Chen_2021_SBB	Forests	Temperate	Temperate_Forests	8	radiata pine and eucalypt	-43.6647	172.705	69	11.4542	0.7685	903	5.12961	27.6967	3.324	0.522225	16.8175	53.0361
P349	349	F733-R1083	2	SRR11610917	Chen_2021_SBB	Forests	Temperate	Temperate_Forests	8	radiata pine and eucalypt	-43.6647	172.705	69	11.4542	0.7685	903	4.90089	23.6272	2.16858	0.605888	15.7664	38.996
P350	350	F733-R1083	2	SRR11610916	Chen_2021_SBB	Forests	Temperate	Temperate_Forests	8	radiata pine and eucalypt	-43.6647	172.705	69	11.4542	0.7685	903	5.14451	22.6494	2.01451	0.503586	17.2555	44.9763
P351	351	F733-R1083	2	SRR11610914	Chen_2021_SBB	Forests	Temperate	Temperate_Forests	8	radiata pine and eucalypt	-43.6647	172.705	69	11.4542	0.7685	903	5.13771	22.0038	1.52779	0.467484	14.6277	47.0685
P352	352	F733-R1083	2	SRR11610913	Chen_2021_SBB	Forests	Temperate	Temperate_Forests	8	radiata pine and eucalypt	-43.6647	172.705	69	11.4542	0.7685	903	5.15986	24.0501	1.79441	0.387306	11.1241	62.096
P353	353	F733-R1083	2	SRR11610938	Chen_2021_SBB	Grasslands	Temperate	Temperate_Grasslands	9	radiata pine and eucalypt	-43.6647	172.705	69	11.4542	0.7685	903	5.39404	47.4088	3.91038	0.431569	9.50365	109.852
P354	354	F733-R1083	2	SRR11610937	Chen_2021_SBB	Grasslands	Temperate	Temperate_Grasslands	9	radiata pine and eucalypt	-43.6647	172.705	69	11.4542	0.7685	903	5.40316	51.9519	3.98818	0.755786	18.7007	68.739
P355	355	F733-R1083	2	SRR11610926	Chen_2021_SBB	Grasslands	Temperate	Temperate_Grasslands	9	radiata pine and eucalypt	-43.6647	172.705	69	11.4542	0.7685	903	5.41768	46.427	4.4137	0.734966	17.2993	63.1689
P356	356	F733-R1083	2	SRR11610915	Chen_2021_SBB	Grasslands	Temperate	Temperate_Grasslands	9	radiata pine and eucalypt	-43.6647	172.705	69	11.4542	0.7685	903	5.50546	44.8805	3.78881	0.655202	15.7226	68.4988
P357	357	F733-R1083	2	SRR11610904	Chen_2021_SBB	Grasslands	Temperate	Temperate_Grasslands	9	radiata pine and eucalypt	-43.6647	172.705	69	11.4542	0.7685	903	5.45283	29.1621	3.41285	0.617193	11.9124	47.2495
P358	358	F733-R1083	2	SRR11610903	Chen_2021_SBB	Grasslands	Temperate	Temperate_Grasslands	9	radiata pine and eucalypt	-43.6647	172.705	69	11.4542	0.7685	903	5.49202	34.3907	3.58311	0.649751	8.9781	52.929
P359	359	F733-R1083	2	SRR11610936	Chen_2021_SBB	Grasslands	Temperate	Temperate_Grasslands	9	radiata pine and eucalypt	-43.6647	172.705	69	11.4542	0.7685	903	5.25881	38.7546	3.37019	0.61819	8.27737	62.6904
P360	360	F733-R1083	2	SRR11610935	Chen_2021_SBB	Grasslands	Temperate	Temperate_Grasslands	9	radiata pine and eucalypt	-43.6647	172.705	69	11.4542	0.7685	903	5.17327	31.4895	3.08596	0.637351	8.05839	49.4069
P361	361	F733-R1083	2	SRR11610908	Chen_2021_SBB	Grasslands	Temperate	Temperate_Grasslands	9	radiata pine and eucalypt	-43.6647	172.705	69	11.4542	0.7685	903	5.35339	19.1149	2.30722	0.649689	7.88321	29.4216
P362	362	F733-R1083	2	SRR11610907	Chen_2021_SBB	Grasslands	Temperate	Temperate_Grasslands	9	radiata pine and eucalypt	-43.6647	172.705	69	11.4542	0.7685	903	5.32017	19.0764	2.17657	0.562311	8.10219	33.9249
P363	363	F733-R1083	2	SRR11610906	Chen_2021_SBB	Grasslands	Temperate	Temperate_Grasslands	9	radiata pine and eucalypt	-43.6647	172.705	69	11.4542	0.7685	903	5.58529	21.8733	2.27855	0.546641	7.22628	40.014
P364	364	F733-R1083	2	SRR11610905	Chen_2021_SBB	Grasslands	Temperate	Temperate_Grasslands	9	radiata pine and eucalypt	-43.6647	172.705	69	11.4542	0.7685	903	5.62855	19.7063	2.20592	0.532887	6.13139	36.9803
P365	365	F733-R1083	2	SRR11610934	Chen_2021_SBB	Forests	Temperate	Temperate_Forests	8	radiata pine and eucalypt	-43.6647	172.705	69	11.4542	0.7685	903	4.8994	45.7599	3.39256	0.507864	6.87591	90.1028
P366	366	F733-R1083	2	SRR11610933	Chen_2021_SBB	Forests	Temperate	Temperate_Forests	8	radiata pine and eucalypt	-43.6647	172.705	69	11.4542	0.7685	903	4.94343	44.3094	3.58437	0.571984	27.3285	77.4661
P367	367	F733-R1083	2	SRR11610932	Chen_2021_SBB	Forests	Temperate	Temperate_Forests	8	radiata pine and eucalypt	-43.6647	172.705	69	11.4542	0.7685	903	4.98601	45.8875	3.32579	0.561847	25.4891	81.6726
P368	368	F733-R1083	2	SRR11610931	Chen_2021_SBB	Forests	Temperate	Temperate_Forests	8	radiata pine and eucalypt	-43.6647	172.705	69	11.4542	0.7685	903	4.94908	36.8189	3.36669	0.535987	23.2993	68.6937
P369	369	F733-R1083	2	SRR11610925	Chen_2021_SBB	Forests	Temperate	Temperate_Forests	8	radiata pine and eucalypt	-43.6647	172.705	69	11.4542	0.7685	903	5.25211	34.901	2.75399	0.495989	21.0219	70.3664
P370	370	F733-R1083	2	SRR11610924	Chen_2021_SBB	Forests	Temperate	Temperate_Forests	8	radiata pine and eucalypt	-43.6647	172.705	69	11.4542	0.7685	903	5.23552	21.8733	2.78838	0.480426	24.4818	45.5289
P371	371	F733-R1083	2	SRR11610923	Chen_2021_SBB	Forests	Temperate	Temperate_Forests	8	radiata pine and eucalypt	-43.6647	172.705	69	11.4542	0.7685	903	5.09924	25.6338	2.48836	0.502	21.1971	51.0635
P372	372	F733-R1083	2	SRR11610922	Chen_2021_SBB	Forests	Temperate	Temperate_Forests	8	radiata pine and eucalypt	-43.6647	172.705	69	11.4542	0.7685	903	5.04525	28.1026	2.81662	0.513172	20.7591	54.7624
P373	373	F733-R1083	2	SRR11610930	Chen_2021_SBB	Forests	Temperate	Temperate_Forests	8	radiata pine and eucalypt	-43.6647	172.705	69	11.4542	0.7685	903	5.35249	25.0517	2.03028	0.516544	18.3504	48.4986
P374	374	F733-R1083	2	SRR11610929	Chen_2021_SBB	Forests	Temperate	Temperate_Forests	8	radiata pine and eucalypt	-43.6647	172.705	69	11.4542	0.7685	903	5.06844	24.6745	2.2052	0.559096	15.9416	44.1328
P375	375	F733-R1083	2	SRR11610928	Chen_2021_SBB	Forests	Temperate	Temperate_Forests	8	radiata pine and eucalypt	-43.6647	172.705	69	11.4542	0.7685	903	5.20692	26.7019	1.88498	0.530778	15.0657	50.3072
P376	376	F733-R1083	2	SRR11610927	Chen_2021_SBB	Forests	Temperate	Temperate_Forests	8	radiata pine and eucalypt	-43.6647	172.705	69	11.4542	0.7685	903	5.50603	22.8723	2.24782	0.472792	13.3577	48.377
P377	377	F733-R1083	2	SRR13124079	Wang_2023_STR	Croplands	Temperate	Croplands	4	Lemon	30.4	105.54	323	17.3542	1.079	1055	5.82675	18.9425	0.679951	0.430436	15.2323	44.0076
P378	378	F733-R1083	2	SRR13124094	Wang_2023_STR	Croplands	Temperate	Croplands	4	Lemon	30.4	105.54	323	17.3542	1.079	1055	5.89321	18.7737	0.678188	0.427624	14.2323	43.9024
P379	379	F733-R1083	2	SRR13124093	Wang_2023_STR	Croplands	Temperate	Croplands	4	Lemon	30.4	105.54	323	17.3542	1.079	1055	5.86207	19.1303	0.679543	0.426763	15.4342	44.8266
P380	380	F733-R1083	2	SRR13124092	Wang_2023_STR	Croplands	Temperate	Croplands	4	Lemon	30.4	105.54	323	17.3542	1.079	1055	5.36743	16.5573	0.615845	0.53541	16.2323	30.9246
P381	381	F733-R1083	2	SRR13124091	Wang_2023_STR	Croplands	Temperate	Croplands	4	Lemon	30.4	105.54	323	17.3542	1.079	1055	5.35193	16.7442	0.616092	0.534859	16.8442	31.3059
P382	382	F733-R1083	2	SRR13124090	Wang_2023_STR	Croplands	Temperate	Croplands	4	Lemon	30.4	105.54	323	17.3542	1.079	1055	5.40569	16.7341	0.615113	0.540379	16.898	30.9674
P383	383	F730-R1101	1	SRR12844100	Wan_2021_Geoderma;Wan_2021_STOTEN	Forests	Temperate	Temperate_Forests	8	unknown	31.7894	110.516	1792	9.1375	1.2985	1214	7.05	12.7	1.8	1.86	40	6.82796
P384	384	F730-R1101	1	SRR12844054	Wan_2021_Geoderma;Wan_2021_STOTEN	Forests	Temperate	Temperate_Forests	8	unknown	31.7894	110.516	1792	9.1375	1.2985	1214	6.07	102.1	7.6	1.8	40	56.7222
P385	385	F730-R1101	1	SRR12844043	Wan_2021_Geoderma;Wan_2021_STOTEN	Forests	Temperate	Temperate_Forests	8	unknown	31.7894	110.516	1792	9.1375	1.2985	1214	6.4	96.1	7.4	1.51	40	63.6424
P386	386	F730-R1101	1	SRR12844032	Wan_2021_Geoderma;Wan_2021_STOTEN	Forests	Temperate	Temperate_Forests	8	unknown	31.7894	110.516	1792	9.1375	1.2985	1214	5.94	149.6	10.5	2.02	50	74.0594
P387	387	F730-R1101	1	SRR12844021	Wan_2021_Geoderma;Wan_2021_STOTEN	Forests	Temperate	Temperate_Forests	8	unknown	31.8019	110.495	1717	9.37917	1.2796	1197	7.01	29.9	2.8	1.59	50	18.805
P388	388	F730-R1101	1	SRR12844099	Wan_2021_Geoderma;Wan_2021_STOTEN	Forests	Temperate	Temperate_Forests	8	unknown	31.8019	110.495	1717	9.37917	1.2796	1197	7.13	40	3.5	3.64	80	10.989
P389	389	F730-R1101	1	SRR12844088	Wan_2021_Geoderma;Wan_2021_STOTEN	Forests	Temperate	Temperate_Forests	8	unknown	31.8019	110.495	1717	9.37917	1.2796	1197	7.4	62.3	4.5	2.13	40	29.2488
P390	390	F730-R1101	1	SRR12844077	Wan_2021_Geoderma;Wan_2021_STOTEN	Forests	Temperate	Temperate_Forests	8	unknown	31.8019	110.495	1717	9.37917	1.2796	1197	7.43	82.5	6.3	1.93	50	42.7461
P391	391	F730-R1101	1	SRR12844066	Wan_2021_Geoderma;Wan_2021_STOTEN	Forests	Temperate	Temperate_Forests	8	unknown	31.8019	110.495	1717	9.37917	1.2796	1197	7.03	75.7	6	1.77	40	42.7684
P392	392	F730-R1101	1	SRR12844055	Wan_2021_Geoderma;Wan_2021_STOTEN	Forests	Temperate	Temperate_Forests	8	unknown	31.7558	110.586	1121	11.9292	1.1001	1139	7.16	91.4	7.9	2.07	120	44.1546
P393	393	F730-R1101	1	SRR12844053	Wan_2021_Geoderma;Wan_2021_STOTEN	Forests	Temperate	Temperate_Forests	8	unknown	31.7558	110.586	1121	11.9292	1.1001	1139	6.88	51	5	1.92	40	26.5625
P394	394	F730-R1101	1	SRR12844052	Wan_2021_Geoderma;Wan_2021_STOTEN	Forests	Temperate	Temperate_Forests	8	unknown	31.7558	110.586	1121	11.9292	1.1001	1139	6.22	78.4	5.8	1.53	50	51.2418
P395	395	F730-R1101	1	SRR12844051	Wan_2021_Geoderma;Wan_2021_STOTEN	Forests	Temperate	Temperate_Forests	8	unknown	31.7447	110.605	1253	11.4875	1.1087	1153	4.14	26.2	2.3	1.31	40	20
P396	396	F730-R1101	1	SRR12844049	Wan_2021_Geoderma;Wan_2021_STOTEN	Forests	Temperate	Temperate_Forests	8	unknown	31.7447	110.605	1253	11.4875	1.1087	1153	6.87	79.2	6	1.03	40	76.8932
P397	397	F730-R1101	1	SRR12844050	Wan_2021_Geoderma;Wan_2021_STOTEN	Forests	Temperate	Temperate_Forests	8	unknown	31.7447	110.605	1253	11.4875	1.1087	1153	6.43	74.7	5.5	2.5	40	29.88
P398	398	F730-R1101	1	SRR12844048	Wan_2021_Geoderma;Wan_2021_STOTEN	Forests	Temperate	Temperate_Forests	8	unknown	31.7447	110.605	1253	11.4875	1.1087	1153	6.29	93.9	5.5	1.14	50	82.3684
P399	399	F730-R1101	1	SRR12844047	Wan_2021_Geoderma;Wan_2021_STOTEN	Forests	Temperate	Temperate_Forests	8	unknown	31.7447	110.605	1253	11.4875	1.1087	1153	6.17	121.4	8	1.19	60	102.017
P400	400	F730-R1101	1	SRR12844046	Wan_2021_Geoderma;Wan_2021_STOTEN	Forests	Temperate	Temperate_Forests	8	unknown	31.7447	110.605	1253	11.4875	1.1087	1153	5.78	192.3	11.3	1.33	50	144.586
P401	401	F730-R1101	1	SRR12844045	Wan_2021_Geoderma;Wan_2021_STOTEN	Forests	Temperate	Temperate_Forests	8	unknown	31.7058	110.85	868	13.1833	0.9657	1100	7.65	73	3.2	2.96	120	24.6622
P402	402	F730-R1101	1	SRR12844044	Wan_2021_Geoderma;Wan_2021_STOTEN	Forests	Temperate	Temperate_Forests	8	unknown	31.7058	110.85	868	13.1833	0.9657	1100	7.52	69.5	4	2.7	70	25.7407
P403	403	F730-R1101	1	SRR12844042	Wan_2021_Geoderma;Wan_2021_STOTEN	Forests	Temperate	Temperate_Forests	8	unknown	31.7058	110.85	868	13.1833	0.9657	1100	7.49	90.1	5.3	1.65	50	54.6061
P404	404	F730-R1101	1	SRR12844041	Wan_2021_Geoderma;Wan_2021_STOTEN	Forests	Temperate	Temperate_Forests	8	unknown	31.5853	110.662	1794	8.70833	1.4307	1253	7.2	114.8	7.2	1.64	40	70
P405	405	F730-R1101	1	SRR12844040	Wan_2021_Geoderma;Wan_2021_STOTEN	Forests	Temperate	Temperate_Forests	8	unknown	31.5853	110.662	1794	8.70833	1.4307	1253	7.65	118.3	6.6	1.01	40	117.129
P406	406	F730-R1101	1	SRR12844038	Wan_2021_Geoderma;Wan_2021_STOTEN	Forests	Temperate	Temperate_Forests	8	unknown	31.5853	110.662	1794	8.70833	1.4307	1253	5.88	231.2	12.4	1.53	60	151.111
P407	407	F730-R1101	1	SRR12844039	Wan_2021_Geoderma;Wan_2021_STOTEN	Forests	Temperate	Temperate_Forests	8	unknown	31.5853	110.662	1794	8.70833	1.4307	1253	5.84	46.8	3.2	0.98	40	47.7551
P408	408	F730-R1101	1	SRR12844037	Wan_2021_Geoderma;Wan_2021_STOTEN	Forests	Temperate	Temperate_Forests	8	unknown	31.5853	110.662	1794	8.70833	1.4307	1253	5.99	48.8	4	1.51	50	32.3179
P409	409	F730-R1101	1	SRR12844036	Wan_2021_Geoderma;Wan_2021_STOTEN	Forests	Temperate	Temperate_Forests	8	unknown	31.7369	110.595	1574	10.2333	1.1777	1186	5.95	38.6	3	2.09	50	18.4689
P410	410	F730-R1101	1	SRR12844035	Wan_2021_Geoderma;Wan_2021_STOTEN	Forests	Temperate	Temperate_Forests	8	unknown	31.7369	110.595	1574	10.2333	1.1777	1186	6.11	53	4.5	3.4	40	15.5882
P411	411	F730-R1101	1	SRR12844034	Wan_2021_Geoderma;Wan_2021_STOTEN	Forests	Temperate	Temperate_Forests	8	unknown	31.7369	110.595	1574	10.2333	1.1777	1186	6.03	75	5	3.01	70	24.9169
P412	412	F730-R1101	1	SRR12844033	Wan_2021_Geoderma;Wan_2021_STOTEN	Forests	Temperate	Temperate_Forests	8	unknown	31.7369	110.595	1574	10.2333	1.1777	1186	5.48	76.2	5.5	1.95	40	39.0769
P413	413	F730-R1101	1	SRR12844031	Wan_2021_Geoderma;Wan_2021_STOTEN	Forests	Temperate	Temperate_Forests	8	unknown	31.7369	110.595	1574	10.2333	1.1777	1186	5.96	125	7.8	0.88	40	142.045
P414	414	F730-R1101	1	SRR12844030	Wan_2021_Geoderma;Wan_2021_STOTEN	Forests	Temperate	Temperate_Forests	8	unknown	31.7369	110.595	1574	10.2333	1.1777	1186	6.97	176.5	10.9	4.66	120	37.8755
P415	415	F730-R1101	1	SRR12844029	Wan_2021_Geoderma;Wan_2021_STOTEN	Forests	Temperate	Temperate_Forests	8	unknown	31.7369	110.595	1574	10.2333	1.1777	1186	6.3	75.9	5.9	2.07	60	36.6667
P416	416	F730-R1101	1	SRR12844027	Wan_2021_Geoderma;Wan_2021_STOTEN	Forests	Temperate	Temperate_Forests	8	unknown	31.7369	110.595	1574	10.2333	1.1777	1186	5.11	95.8	6	2.02	40	47.4257
P417	417	F730-R1101	1	SRR12844028	Wan_2021_Geoderma;Wan_2021_STOTEN	Forests	Temperate	Temperate_Forests	8	unknown	31.7472	110.606	1253	11.4875	1.1087	1153	6.14	55.3	4.4	1.54	50	35.9091
P418	418	F730-R1101	1	SRR12844026	Wan_2021_Geoderma;Wan_2021_STOTEN	Forests	Temperate	Temperate_Forests	8	unknown	31.7472	110.606	1253	11.4875	1.1087	1153	6.03	65	4.8	1.57	40	41.4013
P419	419	F730-R1101	1	SRR12844025	Wan_2021_Geoderma;Wan_2021_STOTEN	Forests	Temperate	Temperate_Forests	8	unknown	31.7472	110.606	1253	11.4875	1.1087	1153	6.61	87.4	6.3	1.8	50	48.5556
P420	420	F730-R1101	1	SRR12844024	Wan_2021_Geoderma;Wan_2021_STOTEN	Forests	Temperate	Temperate_Forests	8	unknown	31.7472	110.606	1253	11.4875	1.1087	1153	6.22	24.6	2.2	2.59	30	9.49807
P421	421	F730-R1101	1	SRR12844023	Wan_2021_Geoderma;Wan_2021_STOTEN	Forests	Temperate	Temperate_Forests	8	unknown	31.7472	110.606	1253	11.4875	1.1087	1153	6.37	84.4	6.1	1.54	50	54.8052
P422	422	F730-R1101	1	SRR12844022	Wan_2021_Geoderma;Wan_2021_STOTEN	Forests	Temperate	Temperate_Forests	8	unknown	31.7472	110.606	1253	11.4875	1.1087	1153	6.17	95.8	6.8	0.5	40	191.6
P423	423	F730-R1101	1	SRR12844020	Wan_2021_Geoderma;Wan_2021_STOTEN	Forests	Temperate	Temperate_Forests	8	unknown	31.7472	110.606	1253	11.4875	1.1087	1153	5.84	141.9	8.9	2.07	80	68.5507
P424	424	F730-R1101	1	SRR12844019	Wan_2021_Geoderma;Wan_2021_STOTEN	Forests	Temperate	Temperate_Forests	8	unknown	31.685	110.595	960	12.7375	1.0291	1122	6.55	77.6	5.5	1.32	40	58.7879
P425	425	F730-R1101	1	SRR12844018	Wan_2021_Geoderma;Wan_2021_STOTEN	Forests	Temperate	Temperate_Forests	8	unknown	31.685	110.595	960	12.7375	1.0291	1122	5.16	83.6	5.3	1.04	40	80.3846
P426	426	F730-R1101	1	SRR12844016	Wan_2021_Geoderma;Wan_2021_STOTEN	Forests	Temperate	Temperate_Forests	8	unknown	31.685	110.595	960	12.7375	1.0291	1122	6.37	41.6	3.8	1.56	60	26.6667
P427	427	F730-R1101	1	SRR12844017	Wan_2021_Geoderma;Wan_2021_STOTEN	Forests	Temperate	Temperate_Forests	8	unknown	31.685	110.595	960	12.7375	1.0291	1122	5.98	32.3	2.4	0.93	40	34.7312
P428	428	F730-R1101	1	SRR12844015	Wan_2021_Geoderma;Wan_2021_STOTEN	Forests	Temperate	Temperate_Forests	8	unknown	31.685	110.595	960	12.7375	1.0291	1122	6.52	86.4	5.6	1.11	40	77.8378
P429	429	F730-R1101	1	SRR12844014	Wan_2021_Geoderma;Wan_2021_STOTEN	Forests	Temperate	Temperate_Forests	8	unknown	31.4375	110.441	1106	11.7292	1.2313	1194	6.83	37	3.7	1.98	50	18.6869
P430	430	F730-R1101	1	SRR12844013	Wan_2021_Geoderma;Wan_2021_STOTEN	Forests	Temperate	Temperate_Forests	8	unknown	31.4375	110.441	1106	11.7292	1.2313	1194	6.91	110.5	7.4	1.92	50	57.5521
P431	431	F730-R1101	1	SRR12844012	Wan_2021_Geoderma;Wan_2021_STOTEN	Forests	Temperate	Temperate_Forests	8	unknown	31.4375	110.441	1106	11.7292	1.2313	1194	6.78	58	5	1.67	40	34.7305
P432	432	F730-R1101	1	SRR12844011	Wan_2021_Geoderma;Wan_2021_STOTEN	Forests	Temperate	Temperate_Forests	8	unknown	31.4375	110.441	1106	11.7292	1.2313	1194	5.89	137.4	11.6	2.32	50	59.2241
P433	433	F730-R1101	1	SRR12844098	Wan_2021_Geoderma;Wan_2021_STOTEN	Forests	Temperate	Temperate_Forests	8	unknown	31.4375	110.441	1106	11.7292	1.2313	1194	6.22	96.9	8	1.51	40	64.1722
P434	434	F730-R1101	1	SRR12844097	Wan_2021_Geoderma;Wan_2021_STOTEN	Forests	Temperate	Temperate_Forests	8	unknown	31.4375	110.441	1106	11.7292	1.2313	1194	6.07	50.8	4.4	1.39	40	36.5468
P435	435	F730-R1101	1	SRR12844096	Wan_2021_Geoderma;Wan_2021_STOTEN	Forests	Temperate	Temperate_Forests	8	unknown	31.4375	110.441	1106	11.7292	1.2313	1194	6.47	110	8	1.34	40	82.0896
P436	436	F730-R1101	1	SRR12844095	Wan_2021_Geoderma;Wan_2021_STOTEN	Forests	Temperate	Temperate_Forests	8	unknown	31.4539	110.421	1426	10.5292	1.2831	1226	5.86	58.1	5.3	1.22	30	47.623
P437	437	F730-R1101	1	SRR12844094	Wan_2021_Geoderma;Wan_2021_STOTEN	Forests	Temperate	Temperate_Forests	8	unknown	31.4539	110.421	1426	10.5292	1.2831	1226	6.37	131.9	8.7	1.42	40	92.8873
P438	438	F730-R1101	1	SRR12844093	Wan_2021_Geoderma;Wan_2021_STOTEN	Forests	Temperate	Temperate_Forests	8	unknown	31.4539	110.421	1426	10.5292	1.2831	1226	4.9	57.6	4.7	1.6	40	36
P439	439	F730-R1101	1	SRR12844092	Wan_2021_Geoderma;Wan_2021_STOTEN	Forests	Temperate	Temperate_Forests	8	unknown	31.4539	110.421	1426	10.5292	1.2831	1226	6.39	30.6	2.9	2.8	40	10.9286
P440	440	F730-R1101	1	SRR12844091	Wan_2021_Geoderma;Wan_2021_STOTEN	Forests	Temperate	Temperate_Forests	8	unknown	31.4539	110.421	1426	10.5292	1.2831	1226	6.69	13.6	1.5	4.18	100	3.25359
P441	441	F730-R1101	1	SRR12844090	Wan_2021_Geoderma;Wan_2021_STOTEN	Forests	Temperate	Temperate_Forests	8	unknown	31.4539	110.421	1426	10.5292	1.2831	1226	6.73	24.2	2	1.13	40	21.4159
P442	442	F730-R1101	1	SRR12844089	Wan_2021_Geoderma;Wan_2021_STOTEN	Forests	Temperate	Temperate_Forests	8	unknown	31.4539	110.421	1426	10.5292	1.2831	1226	6.6	71.8	5	1.54	50	46.6234
P443	443	F730-R1101	1	SRR12844087	Wan_2021_Geoderma;Wan_2021_STOTEN	Forests	Temperate	Temperate_Forests	8	unknown	31.4675	110.407	1607	9.82083	1.3183	1239	6.65	70.4	4.4	2.23	40	31.5695
P444	444	F730-R1101	1	SRR12844086	Wan_2021_Geoderma;Wan_2021_STOTEN	Forests	Temperate	Temperate_Forests	8	unknown	31.4675	110.407	1607	9.82083	1.3183	1239	7.35	50.2	3.6	3.02	50	16.6225
P445	445	F730-R1101	1	SRR12844085	Wan_2021_Geoderma;Wan_2021_STOTEN	Forests	Temperate	Temperate_Forests	8	unknown	31.4675	110.407	1607	9.82083	1.3183	1239	6.92	37.4	2.9	1.48	40	25.2703
P446	446	F730-R1101	1	SRR12844084	Wan_2021_Geoderma;Wan_2021_STOTEN	Forests	Temperate	Temperate_Forests	8	unknown	31.4675	110.407	1607	9.82083	1.3183	1239	6.42	71.9	5	1.77	40	40.6215
P447	447	F730-R1101	1	SRR12844083	Wan_2021_Geoderma;Wan_2021_STOTEN	Forests	Temperate	Temperate_Forests	8	unknown	31.4675	110.407	1607	9.82083	1.3183	1239	7.52	25.4	1.8	0.96	40	26.4583
P448	448	F730-R1101	1	SRR12844082	Wan_2021_Geoderma;Wan_2021_STOTEN	Forests	Temperate	Temperate_Forests	8	unknown	31.4581	110.423	1426	10.5292	1.2831	1226	7.2	58.8	4.6	1.96	60	30
P449	449	F730-R1101	1	SRR12844081	Wan_2021_Geoderma;Wan_2021_STOTEN	Forests	Temperate	Temperate_Forests	8	unknown	31.4581	110.423	1426	10.5292	1.2831	1226	7.26	97.2	5.9	1.93	50	50.3627
P450	450	F730-R1101	1	SRR12844080	Wan_2021_Geoderma;Wan_2021_STOTEN	Forests	Temperate	Temperate_Forests	8	unknown	31.4581	110.423	1426	10.5292	1.2831	1226	7.07	69.9	5	1.75	50	39.9429
P451	451	F730-R1101	1	SRR12844079	Wan_2021_Geoderma;Wan_2021_STOTEN	Forests	Temperate	Temperate_Forests	8	unknown	31.4581	110.423	1426	10.5292	1.2831	1226	7.31	119	4.4	2.01	60	59.204
P452	452	F730-R1101	1	SRR12844078	Wan_2021_Geoderma;Wan_2021_STOTEN	Forests	Temperate	Temperate_Forests	8	unknown	31.4581	110.423	1426	10.5292	1.2831	1226	6.04	61.4	4.1	1.01	40	60.7921
P453	453	F730-R1101	1	SRR12844076	Wan_2021_Geoderma;Wan_2021_STOTEN	Forests	Temperate	Temperate_Forests	8	unknown	31.6867	110.411	1852	8.4875	1.4086	1231	5.4	74.9	6	1.93	50	38.8083
P454	454	F730-R1101	1	SRR12844075	Wan_2021_Geoderma;Wan_2021_STOTEN	Forests	Temperate	Temperate_Forests	8	unknown	31.6867	110.411	1852	8.4875	1.4086	1231	4.75	77.3	4.8	1.13	40	68.4071
P455	455	F730-R1101	1	SRR12844074	Wan_2021_Geoderma;Wan_2021_STOTEN	Forests	Temperate	Temperate_Forests	8	unknown	31.6867	110.411	1852	8.4875	1.4086	1231	7.55	24.4	1.2	4.75	120	5.13684
P456	456	F730-R1101	1	SRR12844073	Wan_2021_Geoderma;Wan_2021_STOTEN	Forests	Temperate	Temperate_Forests	8	unknown	31.6789	110.333	2055	7.5875	1.486	1251	4.84	46.4	3.2	0.73	40	63.5616
P457	457	F730-R1101	1	SRR12844072	Wan_2021_Geoderma;Wan_2021_STOTEN	Forests	Temperate	Temperate_Forests	8	unknown	31.6789	110.333	2055	7.5875	1.486	1251	4.82	63.2	3.3	0.92	40	68.6957
P458	458	F730-R1101	1	SRR12844071	Wan_2021_Geoderma;Wan_2021_STOTEN	Forests	Temperate	Temperate_Forests	8	unknown	31.6789	110.333	2055	7.5875	1.486	1251	4.81	87.8	4.9	1.08	40	81.2963
P459	459	F730-R1101	1	SRR12844070	Wan_2021_Geoderma;Wan_2021_STOTEN	Forests	Temperate	Temperate_Forests	8	unknown	31.6789	110.333	2055	7.5875	1.486	1251	6.04	92.9	5.9	1.3	60	71.4615
P460	460	F730-R1101	1	SRR12844069	Wan_2021_Geoderma;Wan_2021_STOTEN	Forests	Temperate	Temperate_Forests	8	unknown	31.6356	110.278	1561	10.3333	1.214	1207	4.9	59.5	4.2	0.93	40	63.9785
P461	461	F730-R1101	1	SRR12844068	Wan_2021_Geoderma;Wan_2021_STOTEN	Forests	Temperate	Temperate_Forests	8	unknown	31.6356	110.278	1561	10.3333	1.214	1207	6.28	39.5	3.1	1.01	40	39.1089
P462	462	F730-R1101	1	SRR12844067	Wan_2021_Geoderma;Wan_2021_STOTEN	Forests	Temperate	Temperate_Forests	8	unknown	31.6356	110.278	1561	10.3333	1.214	1207	6.34	50.9	3.5	1.12	50	45.4464
P463	463	F730-R1101	1	SRR12844065	Wan_2021_Geoderma;Wan_2021_STOTEN	Forests	Temperate	Temperate_Forests	8	unknown	31.6356	110.278	1561	10.3333	1.214	1207	6.6	44.9	3	0.88	40	51.0227
P464	464	F730-R1101	1	SRR12844064	Wan_2021_Geoderma;Wan_2021_STOTEN	Forests	Temperate	Temperate_Forests	8	unknown	31.6275	110.433	1919	8.52083	1.3696	1239	6.28	91.4	7	1.71	40	53.4503
P465	465	F730-R1101	1	SRR12844063	Wan_2021_Geoderma;Wan_2021_STOTEN	Forests	Temperate	Temperate_Forests	8	unknown	31.6275	110.433	1919	8.52083	1.3696	1239	4.53	126.1	7.2	1.13	40	111.593
P466	466	F730-R1101	1	SRR12844062	Wan_2021_Geoderma;Wan_2021_STOTEN	Forests	Temperate	Temperate_Forests	8	unknown	31.6275	110.433	1919	8.52083	1.3696	1239	5.14	154.4	8.8	1.18	40	130.847
P467	467	F730-R1101	1	SRR12844061	Wan_2021_Geoderma;Wan_2021_STOTEN	Forests	Temperate	Temperate_Forests	8	unknown	31.6275	110.433	1919	8.52083	1.3696	1239	4.24	212.5	12.9	2.06	60	103.155
P468	468	F730-R1101	1	SRR12844060	Wan_2021_Geoderma;Wan_2021_STOTEN	Forests	Temperate	Temperate_Forests	8	unknown	31.6275	110.433	1919	8.52083	1.3696	1239	4.08	174.3	10.1	1.66	50	105
P469	469	F730-R1101	1	SRR12844059	Wan_2021_Geoderma;Wan_2021_STOTEN	Forests	Temperate	Temperate_Forests	8	unknown	31.6275	110.433	1919	8.52083	1.3696	1239	5.1	109.7	7.2	1.61	50	68.1366
P470	470	F730-R1101	1	SRR12844058	Wan_2021_Geoderma;Wan_2021_STOTEN	Forests	Temperate	Temperate_Forests	8	unknown	31.6275	110.433	1919	8.52083	1.3696	1239	4.5	115.2	7.5	1.76	50	65.4545
P471	471	F730-R1101	1	SRR12844057	Wan_2021_Geoderma;Wan_2021_STOTEN	Forests	Temperate	Temperate_Forests	8	unknown	31.6069	110.41	1591	9.78333	1.3043	1211	6.07	95.3	6.5	1.45	40	65.7241
P472	472	F730-R1101	1	SRR12844056	Wan_2021_Geoderma;Wan_2021_STOTEN	Forests	Temperate	Temperate_Forests	8	unknown	31.6069	110.41	1591	9.78333	1.3043	1211	5.4	109.6	6.7	1.15	40	95.3043
P473	473	F733-R1083	2	SRR14876441	Wang_2021_Forest	Forests	Arid	Arid_Forests	1	Not_recorded	43.0333	119.65	474	7.02917	0.288	416	6.93822	0.198321	0.0505651	0.33	9.98	0.600972
P474	474	F733-R1083	2	SRR14876442	Wang_2021_Forest	Forests	Arid	Arid_Forests	1	Not_recorded	43.0333	119.65	474	7.02917	0.288	416	6.78966	0.567799	0.0647851	0.31	10.55	1.83161
P475	475	F733-R1083	2	SRR14876443	Wang_2021_Forest	Forests	Arid	Arid_Forests	1	Not_recorded	43.0333	119.65	474	7.02917	0.288	416	6.71379	0.769754	0.127254	0.322	11.23	2.39054
P476	476	F733-R1083	2	SRR14876444	Wang_2021_Forest	Forests	Arid	Arid_Forests	1	Not_recorded	43.0333	119.65	474	7.02917	0.288	416	6.83391	1.60374	0.603384	0.282	7.54	5.68701
P477	477	F733-R1083	2	SRR14876445	Wang_2021_Forest	Forests	Arid	Arid_Forests	1	Not_recorded	43.0333	119.65	474	7.02917	0.288	416	6.88448	1.60374	0.583498	0.262	7.32	6.12113
P478	478	F733-R1083	2	SRR14876446	Wang_2021_Forest	Forests	Arid	Arid_Forests	1	Not_recorded	43.0333	119.65	474	7.02917	0.288	416	7.03621	4.25886	0.674423	0.273	7.66	15.6002
P479	479	F733-R1083	2	SRR14876447	Wang_2021_Forest	Forests	Arid	Arid_Forests	1	Not_recorded	43.0333	119.65	474	7.02917	0.288	416	7.17213	3.78154	0.730083	0.223	5.89	16.9576
P480	480	F733-R1083	2	SRR14876448	Wang_2021_Forest	Forests	Arid	Arid_Forests	1	Not_recorded	43.0333	119.65	474	7.02917	0.288	416	6.96034	2.70608	0.670439	0.251	5.73	10.7812
P481	481	F733-R1083	2	SRR14876449	Wang_2021_Forest	Forests	Arid	Arid_Forests	1	Not_recorded	43.0333	119.65	474	7.02917	0.288	416	6.88764	2.2017	0.650553	0.234	5.82	9.40896
P482	482	F730-R1101	1	SRR12650013	Zeng_2022_AEE	Croplands	Temperate	Croplands	4	citrus	31.0667	110.683	199	16.3958	0.9327	1124	4.57871	10.1984	1.47318	0.515322	143.079	19.7904
P483	483	F730-R1101	1	SRR12650012	Zeng_2022_AEE	Croplands	Temperate	Croplands	4	citrus	31.0667	110.683	199	16.3958	0.9327	1124	4.56652	11.8704	1.17069	0.506369	143.142	23.4422
P484	484	F730-R1101	1	SRR12650011	Zeng_2022_AEE	Croplands	Temperate	Croplands	4	citrus	31.0667	110.683	199	16.3958	0.9327	1124	4.41389	9.39674	1.30442	0.410857	144.21	22.8711
P485	485	F730-R1101	1	SRR12650010	Zeng_2022_AEE	Croplands	Temperate	Croplands	4	citrus	31.0667	110.683	199	16.3958	0.9327	1124	5.00431	9.42613	1.08424	0.411611	142.667	22.9006
P486	486	F730-R1101	1	SRR12650003	Zeng_2022_AEE	Forests	Temperate	Temperate_Forests	8	Coniferous	31.0667	110.683	199	16.3958	0.9327	1124	7.30101	26.934	2.37109	0.518464	8.02564	51.9496
P487	487	F730-R1101	1	SRR12650002	Zeng_2022_AEE	Forests	Temperate	Temperate_Forests	8	Coniferous	31.0667	110.683	199	16.3958	0.9327	1124	7.18821	27.137	2.6962	0.556774	13.0063	48.7397
P488	488	F730-R1101	1	SRR12650001	Zeng_2022_AEE	Forests	Temperate	Temperate_Forests	8	Coniferous	31.0667	110.683	199	16.3958	0.9327	1124	7.01448	25.5272	1.80623	0.837841	12.1057	30.4678
P489	489	F730-R1101	1	SRR12650000	Zeng_2022_AEE	Forests	Temperate	Temperate_Forests	8	Coniferous	31.0667	110.683	199	16.3958	0.9327	1124	7.06702	31.1374	1.61246	0.712718	12.5786	43.6883
P490	490	F730-R1101	1	SRR12649999	Zeng_2022_AEE	Croplands	Temperate	Croplands	4	citrus	31.0667	110.683	199	16.3958	0.9327	1124	3.89412	7.13767	1.32574	0.586878	143.707	12.1621
P491	491	F730-R1101	1	SRR12649998	Zeng_2022_AEE	Croplands	Temperate	Croplands	4	citrus	31.0667	110.683	199	16.3958	0.9327	1124	4.0759	7.16924	1.47734	0.623354	143.579	11.5011
P492	492	F730-R1101	1	SRR12650019	Zeng_2022_AEE	Croplands	Temperate	Croplands	4	citrus	31.0667	110.683	199	16.3958	0.9327	1124	3.84324	8.43164	1.37592	0.635323	145.854	13.2714
P493	493	F730-R1101	1	SRR12650018	Zeng_2022_AEE	Croplands	Temperate	Croplands	4	citrus	31.0667	110.683	199	16.3958	0.9327	1124	3.97382	9.01596	1.50119	0.547818	147.899	16.4579
P494	494	F730-R1101	1	SRR12650021	Zeng_2022_AEE	Croplands	Temperate	Croplands	4	citrus	31.0667	110.683	199	16.3958	0.9327	1124	6.35207	8.78867	1.52224	0.786398	116.043	11.1759
P495	495	F730-R1101	1	SRR12650020	Zeng_2022_AEE	Croplands	Temperate	Croplands	4	citrus	31.0667	110.683	199	16.3958	0.9327	1124	5.83096	7.54923	1.52421	0.662992	116.672	11.3866
P496	496	F730-R1101	1	SRR12650009	Zeng_2022_AEE	Croplands	Temperate	Croplands	4	citrus	31.0667	110.683	199	16.3958	0.9327	1124	6.08309	9.34699	1.43248	0.789463	118.274	11.8397
P497	497	F730-R1101	1	SRR12650004	Zeng_2022_AEE	Croplands	Temperate	Croplands	4	citrus	31.0667	110.683	199	16.3958	0.9327	1124	6.07557	10.9375	1.44201	0.599047	117.59	18.2582
P498	498	F730-R1101	1	SRR12650008	Zeng_2022_AEE	Croplands	Temperate	Croplands	4	citrus	31.0667	110.683	199	16.3958	0.9327	1124	4.61916	13.4073	1.41266	0.682684	144.636	19.6391
P499	499	F730-R1101	1	SRR12650007	Zeng_2022_AEE	Croplands	Temperate	Croplands	4	citrus	31.0667	110.683	199	16.3958	0.9327	1124	4.71168	9.40376	1.33294	0.813138	141.847	11.5648
P500	500	F730-R1101	1	SRR12650006	Zeng_2022_AEE	Croplands	Temperate	Croplands	4	citrus	31.0667	110.683	199	16.3958	0.9327	1124	4.55257	9.98003	1.41241	0.732633	139.221	13.6221
P501	501	F730-R1101	1	SRR12650005	Zeng_2022_AEE	Croplands	Temperate	Croplands	4	citrus	31.0667	110.683	199	16.3958	0.9327	1124	4.84764	11.3739	1.38617	0.960217	150.949	11.8452
P502	502	F730-R1101	1	SRR12650017	Zeng_2022_AEE	Croplands	Temperate	Croplands	4	citrus	31.0667	110.683	199	16.3958	0.9327	1124	6.73745	20.8846	2.26797	0.530162	135.949	39.3928
P503	503	F730-R1101	1	SRR12650016	Zeng_2022_AEE	Croplands	Temperate	Croplands	4	citrus	31.0667	110.683	199	16.3958	0.9327	1124	3.8038	19.322	2.34483	0.446405	152.454	43.2835
P504	504	F730-R1101	1	SRR12650015	Zeng_2022_AEE	Croplands	Temperate	Croplands	4	citrus	31.0667	110.683	199	16.3958	0.9327	1124	6.85713	19.8414	2.33147	0.650816	152.648	30.4869
P505	505	F730-R1101	1	SRR12650014	Zeng_2022_AEE	Croplands	Temperate	Croplands	4	citrus	31.0667	110.683	199	16.3958	0.9327	1124	5.80652	21.6581	2.39453	0.500168	152.051	43.3017
P506	506	F733-R1083	2	DRR118458	Mise_2018_Microbes Environ	Croplands	Cold	Croplands	4	Cabbages	43	142.9	149	6.13333	1.3014	1091	5.98	36.8	3.1	0.627878	41.5707	58.6101
P507	507	F733-R1083	2	DRR118459	Mise_2018_Microbes Environ	Croplands	Cold	Croplands	4	Cabbages	42.9	143	105	6.07917	1.3119	1091	5.95667	18.2	1.9	0.955542	57.5437	19.0468
P508	508	F733-R1083	2	DRR118460	Mise_2018_Microbes Environ	Croplands	Cold	Croplands	4	Cabbages	43	143.3	113	5.975	1.3131	1104	5.91333	28.9	2.6	0.955542	194.659	30.2446
P509	509	F733-R1083	2	DRR118461	Mise_2018_Microbes Environ	Croplands	Cold	Croplands	4	Lettuces	43	143.3	113	5.975	1.3131	1104	5.59667	71.9	5.2	0.955542	75.3244	75.2452
P510	510	F733-R1083	2	DRR118462	Mise_2018_Microbes Environ	Croplands	Cold	Croplands	4	Potatoes	42.8	143.1	131	5.85417	1.3142	1099	6.26333	28.2	2.4	0.955542	28.2511	29.512
P511	511	F733-R1083	2	DRR118463	Mise_2018_Microbes Environ	Croplands	Cold	Croplands	4	Soy beans	42.8	143.1	131	5.85417	1.3142	1099	6.56	40	3.1	0.955542	97.6966	41.861
P512	512	F733-R1083	2	DRR118464	Mise_2018_Microbes Environ	Croplands	Cold	Croplands	4	Kidney beans	42.8	143.1	131	5.85417	1.3142	1099	6.04667	41	3	0.955542	59.2822	42.9076
P513	513	F733-R1083	2	DRR118465	Mise_2018_Microbes Environ	Croplands	Cold	Croplands	4	No crops	43	141.4	113	7.82083	1.3059	1230	5.18333	57.8	3.9	0.613964	129.703	94.1423
P514	514	F733-R1083	2	DRR118466	Mise_2018_Microbes Environ	Croplands	Cold	Croplands	4	Soy beans	43	141.4	113	7.82083	1.3059	1230	5.02333	60	3.9	0.613964	137.787	97.7256
P515	515	F733-R1083	2	DRR118467	Mise_2018_Microbes Environ	Croplands	Cold	Croplands	4	Soy beans	43	141.4	113	7.82083	1.3059	1230	5.66	38.1	2.8	0.613964	74.2217	62.0558
P516	516	F733-R1083	2	DRR118468	Mise_2018_Microbes Environ	Croplands	Cold	Croplands	4	Onions	43	141.4	113	7.82083	1.3059	1230	5.14667	70.1	4.8	0.613964	81.7376	114.176
P517	517	F733-R1083	2	DRR118469	Mise_2018_Microbes Environ	Croplands	Cold	Croplands	4	Soy beans	43	141.4	113	7.82083	1.3059	1230	5.92	35.7	3	0.613964	47.6503	58.1467
P518	518	F733-R1083	2	DRR118470	Mise_2018_Microbes Environ	Croplands	Temperate	Croplands	4	Green onions	38.7	140.8	243	10.0958	1.3308	1298	5.41667	76.5	4.4	0.581423	54.2539	131.574
P519	519	F733-R1083	2	DRR118471	Mise_2018_Microbes Environ	Croplands	Temperate	Croplands	4	Green onions	38.7	140.8	243	10.0958	1.3308	1298	5.41	70.7	4	0.581423	156.492	121.598
P520	520	F733-R1083	2	DRR118472	Mise_2018_Microbes Environ	Croplands	Temperate	Croplands	4	Green onions	38.7	140.8	243	10.0958	1.3308	1298	5.74	87.3	5	0.581423	117.897	150.149
P521	521	F733-R1083	2	DRR118473	Mise_2018_Microbes Environ	Croplands	Temperate	Croplands	4	Green onions	38.7	140.8	243	10.0958	1.3308	1298	5.39	92.1	5.2	0.581423	185.38	158.404
P522	522	F733-R1083	2	DRR118474	Mise_2018_Microbes Environ	Croplands	Temperate	Croplands	4	Maize	38.7	140.8	243	10.0958	1.3308	1298	5.70667	101.2	5.7	0.581423	90.0852	174.056
P523	523	F733-R1083	2	DRR118475	Mise_2018_Microbes Environ	Croplands	Temperate	Croplands	4	Potatoes	38.7	140.8	243	10.0958	1.3308	1298	6.20667	50	3.4	0.581423	112.586	85.9959
P524	524	F733-R1083	2	DRR118476	Mise_2018_Microbes Environ	Croplands	Temperate	Croplands	4	Maize	37.4	138.9	361	10.8333	2.0025	2112	5.73667	44	3.1	0.597507	161.549	73.6393
P525	525	F733-R1083	2	DRR118477	Mise_2018_Microbes Environ	Croplands	Temperate	Croplands	4	Maize	37.4	138.9	361	10.8333	2.0025	2112	6.22333	40.9	2.8	0.597507	131.57	68.4511
P526	526	F733-R1083	2	DRR118478	Mise_2018_Microbes Environ	Croplands	Temperate	Croplands	4	No crops	37.4	138.9	361	10.8333	2.0025	2112	6.11667	43.9	2.9	0.597507	96.0989	73.4719
P527	527	F733-R1083	2	DRR118479	Mise_2018_Microbes Environ	Croplands	Temperate	Croplands	4	Barley	37.4	138.9	361	10.8333	2.0025	2112	6.40667	40.6	2.8	0.597507	106.613	67.949
P528	528	F733-R1083	2	DRR118480	Mise_2018_Microbes Environ	Croplands	Temperate	Croplands	4	Soy beans	37.4	138.9	361	10.8333	2.0025	2112	5.95333	51.4	3.4	0.597507	129.064	86.0241
P529	529	F733-R1083	2	DRR118481	Mise_2018_Microbes Environ	Croplands	Temperate	Croplands	4	No crops	36	140.1	14	14.2792	1.1361	1319	6.97667	39.6	3	1.0976	10.8188	36.0786
P530	530	F733-R1083	2	DRR118482	Mise_2018_Microbes Environ	Croplands	Temperate	Croplands	4	No crops	36	140.1	14	14.2792	1.1361	1319	6.7	42.6	3.2	1.0976	18.0983	38.8118
P531	531	F733-R1083	2	DRR118483	Mise_2018_Microbes Environ	Croplands	Temperate	Croplands	4	No crops	36	140.1	14	14.2792	1.1361	1319	7.01	49	3.8	1.0976	23.7855	44.6427
P532	532	F733-R1083	2	DRR118484	Mise_2018_Microbes Environ	Croplands	Temperate	Croplands	4	No crops	36	140.1	14	14.2792	1.1361	1319	5.25	45.5	3.4	1.0976	79.8178	41.4539
P533	533	F733-R1083	2	DRR118485	Mise_2018_Microbes Environ	Croplands	Temperate	Croplands	4	No crops	36	140.1	14	14.2792	1.1361	1319	5.53	30.5	2.8	1.0976	60.5519	27.7878
P534	534	F733-R1083	2	DRR118486	Mise_2018_Microbes Environ	Croplands	Temperate	Croplands	4	Missing	35.7	139.5	60	14.9833	1.2028	1513	6.08667	56.8	4.3	0.771691	53.6423	73.6046
P535	535	F733-R1083	2	DRR118487	Mise_2018_Microbes Environ	Croplands	Temperate	Croplands	4	Missing	35.7	139.5	60	14.9833	1.2028	1513	5.32	52.4	4.1	0.771691	83.3343	67.9029
P536	536	F733-R1083	2	DRR118488	Mise_2018_Microbes Environ	Croplands	Temperate	Croplands	4	Missing	35.7	139.5	60	14.9833	1.2028	1513	5.88	50.7	4	0.771691	42.1524	65.6999
P537	537	F733-R1083	2	DRR118489	Mise_2018_Microbes Environ	Croplands	Temperate	Croplands	4	Missing	35.7	139.5	60	14.9833	1.2028	1513	6.56667	61.6	5.1	0.771691	79.6321	79.8247
P538	538	F733-R1083	2	DRR118490	Mise_2018_Microbes Environ	Croplands	Temperate	Croplands	4	Missing	35.7	139.5	60	14.9833	1.2028	1513	6.71	36	3.2	0.771691	21.4197	46.6508
P539	539	F733-R1083	2	DRR118491	Mise_2018_Microbes Environ	Croplands	Temperate	Croplands	4	cabbages	36.1	137.9	886	10.0792	1.154	1277	7.12333	44.3	3.3	0.673407	308.621	65.7849
P540	540	F733-R1083	2	DRR118492	Mise_2018_Microbes Environ	Croplands	Temperate	Croplands	4	radish	36.1	137.9	886	10.0792	1.154	1277	7.09	38.3	3	0.673407	178.249	56.875
P541	541	F733-R1083	2	DRR118493	Mise_2018_Microbes Environ	Croplands	Temperate	Croplands	4	cabbages	36.1	137.9	886	10.0792	1.154	1277	6.84667	35.2	2.8	0.673407	180.636	52.2715
P542	542	F733-R1083	2	DRR118494	Mise_2018_Microbes Environ	Croplands	Temperate	Croplands	4	radish	36.1	137.9	886	10.0792	1.154	1277	7.05667	46.4	3.2	0.673407	232.38	68.9034
P543	543	F733-R1083	2	DRR118495	Mise_2018_Microbes Environ	Croplands	Temperate	Croplands	4	No crops	36.1	137.9	886	10.0792	1.154	1277	7.07	49.8	3.4	0.673407	224.288	73.9523
P544	544	F733-R1083	2	DRR118496	Mise_2018_Microbes Environ	Croplands	Temperate	Croplands	4	Missing	32.9	130.7	84	16.1	1.579	1970	5.97667	80.9	4.8	0.979625	18.9124	82.5826
P545	545	F733-R1083	2	DRR118497	Mise_2018_Microbes Environ	Croplands	Temperate	Croplands	4	Maize	32.9	130.7	84	16.1	1.579	1970	4.84333	78.5	4.9	0.979625	29.0845	80.1327
P546	546	F733-R1083	2	DRR118498	Mise_2018_Microbes Environ	Croplands	Temperate	Croplands	4	Sweet potatoes	32.9	130.7	84	16.1	1.579	1970	5.90667	89.7	5.3	0.979625	15.5215	91.5656
P547	547	F733-R1083	2	DRR118499	Mise_2018_Microbes Environ	Croplands	Temperate	Croplands	4	Maize	32.9	130.7	84	16.1	1.579	1970	6.25667	88.3	5.5	0.979625	36.4768	90.1365
P548	548	F733-R1083	2	DRR118500	Mise_2018_Microbes Environ	Croplands	Temperate	Croplands	4	Maize	32.9	130.7	84	16.1	1.579	1970	6.22667	84.8	5.2	0.979625	21.3609	86.5637
P549	549	F733-R1083	2	SRR23082574	Lu_2023_agronomy	Croplands	Arid	Croplands	4	Wheat	34.2975	108.013	528	13	0.5277	550	8.49199	8.23211	1.16405	0.640798	2.66714	12.8467
P550	550	F733-R1083	2	SRR23082573	Lu_2023_agronomy	Croplands	Arid	Croplands	4	Wheat	34.2975	108.013	528	13	0.5277	550	8.50139	7.6939	1.17049	0.68822	2.87679	11.1794
P551	551	F733-R1083	2	SRR23082567	Lu_2023_agronomy	Croplands	Arid	Croplands	4	Wheat	34.2975	108.013	528	13	0.5277	550	8.48105	8.58201	1.15117	0.639288	2.88797	13.4243
P552	552	F733-R1083	2	SRR23082566	Lu_2023_agronomy	Croplands	Arid	Croplands	4	Wheat	34.2975	108.013	528	13	0.5277	550	8.3576	9.34186	1.27401	0.657823	4.43667	14.2012
P553	553	F733-R1083	2	SRR23082565	Lu_2023_agronomy	Croplands	Arid	Croplands	4	Wheat	34.2975	108.013	528	13	0.5277	550	8.33934	9.00253	1.29649	0.665235	4.46812	13.5329
P554	554	F733-R1083	2	SRR23082564	Lu_2023_agronomy	Croplands	Arid	Croplands	4	Wheat	34.2975	108.013	528	13	0.5277	550	8.35443	10.1973	1.28686	0.646743	4.79017	15.7672
P555	555	F733-R1083	2	SRR23082563	Lu_2023_agronomy	Croplands	Arid	Croplands	4	Wheat	34.2975	108.013	528	13	0.5277	550	8.35427	10.9469	1.48861	1.04769	33.6851	10.4486
P556	556	F733-R1083	2	SRR23082562	Lu_2023_agronomy	Croplands	Arid	Croplands	4	Wheat	34.2975	108.013	528	13	0.5277	550	8.2578	10.9485	1.46132	1.03255	35.2056	10.6034
P557	557	F733-R1083	2	SRR23082561	Lu_2023_agronomy	Croplands	Arid	Croplands	4	Wheat	34.2975	108.013	528	13	0.5277	550	8.28012	10.9833	1.52041	1.05094	34.7821	10.451
P558	558	F733-R1083	2	SRR23082560	Lu_2023_agronomy	Croplands	Arid	Croplands	4	Wheat	34.2975	108.013	528	13	0.5277	550	8.17953	11.9052	1.64202	1.11071	43.2931	10.7185
P559	559	F733-R1083	2	SRR23082572	Lu_2023_agronomy	Croplands	Arid	Croplands	4	Wheat	34.2975	108.013	528	13	0.5277	550	8.14974	11.5584	1.66437	1.13973	41.6154	10.1413
P560	560	F733-R1083	2	SRR23082571	Lu_2023_agronomy	Croplands	Arid	Croplands	4	Wheat	34.2975	108.013	528	13	0.5277	550	8.15167	12.0036	1.75331	1.16561	43.3162	10.2982
P561	561	F733-R1083	2	SRR23082570	Lu_2023_agronomy	Croplands	Arid	Croplands	4	Wheat	34.2975	108.013	528	13	0.5277	550	8.17438	15.7293	1.9728	1.60643	96.0482	9.79148
P562	562	F733-R1083	2	SRR23082569	Lu_2023_agronomy	Croplands	Arid	Croplands	4	Wheat	34.2975	108.013	528	13	0.5277	550	8.20676	15.8573	1.93016	1.5951	87.9298	9.94125
P563	563	F733-R1083	2	SRR23082568	Lu_2023_agronomy	Croplands	Arid	Croplands	4	Wheat	34.2975	108.013	528	13	0.5277	550	8.17673	15.0666	1.8696	1.63306	92.0985	9.22599
P564	564	F730-R1101	1	SRR8705682	Gou_2021_JSS	Croplands	Temperate	Croplands	4	Weed	26.79	102.16	2102	19.7	0.688	1112.6	5.1993	9.81535	2.17907	2.04801	12.2	4.79262
P565	565	F730-R1101	1	SRR8705681	Gou_2021_JSS	Croplands	Temperate	Croplands	4	Weed	26.79	102.16	2102	19.7	0.688	1112.6	5.17352	7.78284	2.33174	2.01741	13.2	3.85784
P566	566	F730-R1101	1	SRR8705680	Gou_2021_JSS	Croplands	Temperate	Croplands	4	Weed	26.79	102.16	2102	19.7	0.688	1112.6	5.17455	8.7703	2.13087	2.04607	14.434	4.28642
P567	567	F730-R1101	1	SRR8705679	Gou_2021_JSS	Croplands	Temperate	Croplands	4	Corn	26.79	102.16	2102	19.7	0.688	1112.6	5.23615	12.8972	2.14634	2.00329	13.2324	6.43802
P568	568	F730-R1101	1	SRR8705678	Gou_2021_JSS	Croplands	Temperate	Croplands	4	Corn	26.79	102.16	2102	19.7	0.688	1112.6	5.23819	19.1229	2.01929	2.12811	14.2424	8.98585
P569	569	F730-R1101	1	SRR8705677	Gou_2021_JSS	Croplands	Temperate	Croplands	4	Corn	26.79	102.16	2102	19.7	0.688	1112.6	5.19923	25.3163	2.34233	2.09772	13.543	12.0685
P570	570	F730-R1101	1	SRR8705676	Gou_2021_JSS	Croplands	Temperate	Croplands	4	Mango	26.79	102.16	2102	19.7	0.688	1112.6	4.94765	7.40434	2.04022	3.19691	18.212	2.31609
P571	571	F730-R1101	1	SRR8705675	Gou_2021_JSS	Croplands	Temperate	Croplands	4	Mango	26.79	102.16	2102	19.7	0.688	1112.6	4.94274	19.3599	2.29985	2.09725	19.045	9.23106
P572	572	F730-R1101	1	SRR8705674	Gou_2021_JSS	Croplands	Temperate	Croplands	4	Mango	26.79	102.16	2102	19.7	0.688	1112.6	5.06315	16.6724	2.60911	2.42374	18.876	6.8788
P573	573	F730-R1101	1	SRR8705673	Gou_2021_JSS	Croplands	Temperate	Croplands	4	Taro	26.79	102.16	2102	19.7	0.688	1112.6	5.43435	12.308	3.59661	4.55462	42.4525	2.7023
P574	574	F730-R1101	1	SRR8705664	Gou_2021_JSS	Croplands	Temperate	Croplands	4	Taro	26.79	102.16	2102	19.7	0.688	1112.6	5.23938	14.0266	3.7827	3.69291	41.4424	3.79826
P575	575	F730-R1101	1	SRR8705663	Gou_2021_JSS	Croplands	Temperate	Croplands	4	Taro	26.79	102.16	2102	19.7	0.688	1112.6	5.30271	12.0114	3.93596	4.26065	41.4242	2.81915
P576	576	F730-R1101	1	SRR8705666	Gou_2021_JSS	Croplands	Temperate	Croplands	4	Corn	26.79	102.16	2102	19.7	0.688	1112.6	5.76571	11.8235	1.3404	0.583725	9.923	20.2552
P577	577	F730-R1101	1	SRR8705665	Gou_2021_JSS	Croplands	Temperate	Croplands	4	Corn	26.79	102.16	2102	19.7	0.688	1112.6	5.65306	6.41647	1.36115	1.55884	9.212	4.11617
P578	578	F730-R1101	1	SRR8705660	Gou_2021_JSS	Croplands	Temperate	Croplands	4	Corn	26.79	102.16	2102	19.7	0.688	1112.6	5.62563	13.7095	1.3419	0.162353	9.232	84.4424
P579	579	F730-R1101	1	SRR8705659	Gou_2021_JSS	Croplands	Temperate	Croplands	4	Corn	26.79	102.16	2102	19.7	0.688	1112.6	6.61438	1.29811	4.01357	2.9335	117.232	0.442512
P580	580	F730-R1101	1	SRR8705662	Gou_2021_JSS	Croplands	Temperate	Croplands	4	Corn	26.79	102.16	2102	19.7	0.688	1112.6	6.73349	4.81939	3.98844	4.55116	119.212	1.05894
P581	581	F730-R1101	1	SRR8705661	Gou_2021_JSS	Croplands	Temperate	Croplands	4	Corn	26.79	102.16	2102	19.7	0.688	1112.6	6.8513	5.81487	3.99366	3.69384	125.424	1.57421
P582	582	F730-R1101	1	SRR8705668	Gou_2021_JSS	Croplands	Temperate	Croplands	4	tobacco	26.79	102.16	2102	19.7	0.688	1112.6	5.44387	7.5388	2.13259	2.21199	8.6443	3.40816
P583	583	F730-R1101	1	SRR8705667	Gou_2021_JSS	Croplands	Temperate	Croplands	4	tobacco	26.79	102.16	2102	19.7	0.688	1112.6	5.49913	7.30601	2.30118	2.25235	7.98989	3.24372
P584	584	F730-R1101	1	SRR8705669	Gou_2021_JSS	Croplands	Temperate	Croplands	4	tobacco	26.79	102.16	2102	19.7	0.688	1112.6	5.44448	6.38267	1.90738	2.32715	8.21213	2.7427
P585	585	F730-R1101	1	SRR8705670	Gou_2021_JSS	Croplands	Temperate	Croplands	4	Walnut-tobacco	26.79	102.16	2102	19.7	0.688	1112.6	5.03965	9.41773	2.82114	2.41445	17.909	3.90057
P586	586	F730-R1101	1	SRR8705671	Gou_2021_JSS	Croplands	Temperate	Croplands	4	Walnut-tobacco	26.79	102.16	2102	19.7	0.688	1112.6	5.38561	7.25695	2.12861	2.48388	18.1212	2.92162
P587	587	F730-R1101	1	SRR8705672	Gou_2021_JSS	Croplands	Temperate	Croplands	4	Walnut-tobacco	26.79	102.16	2102	19.7	0.688	1112.6	5.45509	7.32925	2.89774	2.57519	18.888	2.84611
P588	588	F733-R1083	2	SRR21285431	Li_2022_FronMicro	Croplands	Temperate	Croplands	4	alfalfa	36.2644	120.034	6	13.7	0.493	935.1	6.52759	9.76561	0.711956	0.588235	21.6922	16.6015
P589	589	F733-R1083	2	SRR21285430	Li_2022_FronMicro	Croplands	Temperate	Croplands	4	alfalfa	36.2644	120.034	6	13.7	0.493	935.1	6.63103	8.90772	0.746214	0.598039	24.6625	14.8949
P590	590	F733-R1083	2	SRR21285419	Li_2022_FronMicro	Croplands	Temperate	Croplands	4	alfalfa	36.2644	120.034	6	13.7	0.493	935.1	6.25517	9.1543	0.692849	0.54902	24.9569	16.6739
P591	591	F733-R1083	2	SRR21285408	Li_2022_FronMicro	Croplands	Temperate	Croplands	4	alfalfa	36.2644	120.034	6	13.7	0.493	935.1	6.13448	9.68467	0.670887	0.544118	26.0128	17.7989
P592	592	F733-R1083	2	SRR21285407	Li_2022_FronMicro	Croplands	Temperate	Croplands	4	alfalfa	36.2644	120.034	6	13.7	0.493	935.1	6.46552	8.76625	0.638371	0.546569	24.8247	16.0387
P593	593	F733-R1083	2	SRR21285406	Li_2022_FronMicro	Croplands	Temperate	Croplands	4	alfalfa	36.2644	120.034	6	13.7	0.493	935.1	6.63793	8.77402	0.732602	0.620098	18.8841	14.1494
P594	594	F733-R1083	2	SRR21285405	Li_2022_FronMicro	Croplands	Temperate	Croplands	4	alfalfa	36.2644	120.034	6	13.7	0.493	935.1	6.58621	8.71885	0.667853	0.585784	28.112	14.8841
P595	595	F733-R1083	2	SRR21285404	Li_2022_FronMicro	Croplands	Temperate	Croplands	4	alfalfa	36.2644	120.034	6	13.7	0.493	935.1	6.28276	8.34351	0.653001	0.588235	28.1186	14.184
P596	596	F733-R1083	2	SRR21285403	Li_2022_FronMicro	Croplands	Temperate	Croplands	4	alfalfa	36.2644	120.034	6	13.7	0.493	935.1	6.25172	8.49434	0.662832	0.578431	33.1657	14.6851
P597	597	F733-R1083	2	SRR21285421	Li_2022_FronMicro	Croplands	Temperate	Croplands	4	alfalfa	36.2644	120.034	6	13.7	0.493	935.1	6.11724	8.64663	0.697519	0.563725	27.9808	15.3384
P598	598	F733-R1083	2	SRR21285420	Li_2022_FronMicro	Croplands	Temperate	Croplands	4	alfalfa	36.2644	120.034	6	13.7	0.493	935.1	6.37241	8.8883	0.688329	0.54902	27.9811	16.1894
P599	599	F733-R1083	2	SRR21285418	Li_2022_FronMicro	Croplands	Temperate	Croplands	4	alfalfa	36.2644	120.034	6	13.7	0.493	935.1	6.52069	8.60967	0.691721	0.512255	21.7425	16.8074
P600	600	F733-R1083	2	SRR21285402	Li_2022_FronMicro	Croplands	Temperate	Croplands	4	alfalfa	36.2644	120.034	6	13.7	0.493	935.1	6.57931	9.22033	0.722471	0.715686	35.2786	12.8832
P601	601	F733-R1083	2	SRR21285429	Li_2022_FronMicro	Croplands	Temperate	Croplands	4	alfalfa	36.2644	120.034	6	13.7	0.493	935.1	5.72069	9.14912	0.684147	0.627451	35.7306	14.5814
P602	602	F733-R1083	2	SRR21285428	Li_2022_FronMicro	Croplands	Temperate	Croplands	4	alfalfa	36.2644	120.034	6	13.7	0.493	935.1	5.98276	9.13545	0.67026	0.60049	40.6284	15.2133
P603	603	F733-R1083	2	SRR21285417	Li_2022_FronMicro	Croplands	Temperate	Croplands	4	alfalfa	36.2644	120.034	6	13.7	0.493	935.1	5.72414	9.29795	0.659394	0.60049	38.559	15.4839
P604	604	F733-R1083	2	SRR21285416	Li_2022_FronMicro	Croplands	Temperate	Croplands	4	alfalfa	36.2644	120.034	6	13.7	0.493	935.1	6.06552	8.89632	0.699843	0.60049	37.823	14.8151
P605	605	F733-R1083	2	SRR21285415	Li_2022_FronMicro	Croplands	Temperate	Croplands	4	alfalfa	36.2644	120.034	6	13.7	0.493	935.1	6.11724	8.93523	0.663371	0.566176	36.0372	15.7817
P606	606	F733-R1083	2	SRR21285427	Li_2022_FronMicro	Croplands	Temperate	Croplands	4	alfalfa	36.2644	120.034	6	13.7	0.493	935.1	6.21034	9.07623	0.750397	0.686275	33.5365	13.2254
P607	607	F733-R1083	2	SRR21285426	Li_2022_FronMicro	Croplands	Temperate	Croplands	4	alfalfa	36.2644	120.034	6	13.7	0.493	935.1	6.02759	9.01175	0.755155	0.671569	38.4376	13.419
P608	608	F733-R1083	2	SRR21285425	Li_2022_FronMicro	Croplands	Temperate	Croplands	4	alfalfa	36.2644	120.034	6	13.7	0.493	935.1	5.9931	9.07119	0.751797	0.696078	39.4772	13.0318
P609	609	F733-R1083	2	SRR21285414	Li_2022_FronMicro	Croplands	Temperate	Croplands	4	alfalfa	36.2644	120.034	6	13.7	0.493	935.1	6.04138	8.9257	0.703873	0.764706	36.8173	11.6721
P610	610	F733-R1083	2	SRR21285413	Li_2022_FronMicro	Croplands	Temperate	Croplands	4	alfalfa	36.2644	120.034	6	13.7	0.493	935.1	6.04483	8.76984	0.730318	0.644608	35.0357	13.6049
P611	611	F733-R1083	2	SRR21285412	Li_2022_FronMicro	Croplands	Temperate	Croplands	4	alfalfa	36.2644	120.034	6	13.7	0.493	935.1	5.98966	8.61919	0.71509	0.602941	30.7281	14.2952
P612	612	F733-R1083	2	SRR21285424	Li_2022_FronMicro	Croplands	Temperate	Croplands	4	alfalfa	36.2644	120.034	6	13.7	0.493	935.1	6.04483	8.69565	0.67	0.757353	52.8805	11.4816
P613	613	F733-R1083	2	SRR21285423	Li_2022_FronMicro	Croplands	Temperate	Croplands	4	alfalfa	36.2644	120.034	6	13.7	0.493	935.1	6.24483	8.79609	0.67	0.737745	46.4946	11.9229
P614	614	F733-R1083	2	SRR21285422	Li_2022_FronMicro	Croplands	Temperate	Croplands	4	alfalfa	36.2644	120.034	6	13.7	0.493	935.1	6.36207	8.7988	0.67	0.720588	43.3758	12.2106
P615	615	F733-R1083	2	SRR21285411	Li_2022_FronMicro	Croplands	Temperate	Croplands	4	alfalfa	36.2644	120.034	6	13.7	0.493	935.1	6.42069	9.52295	0.733644	0.737745	39.8245	12.9082
P616	616	F733-R1083	2	SRR21285410	Li_2022_FronMicro	Croplands	Temperate	Croplands	4	alfalfa	36.2644	120.034	6	13.7	0.493	935.1	6.27586	9.41193	0.723677	0.683824	38.1908	13.7637
P617	617	F733-R1083	2	SRR21285409	Li_2022_FronMicro	Croplands	Temperate	Croplands	4	alfalfa	36.2644	120.034	6	13.7	0.493	935.1	6.01034	9.13302	0.755786	0.732843	36.1116	12.4625
P618	618	F730-R1101	1	SRR15196283	Xiong_2023_EcoInd	Aquatic	Cold	Sediments	7	Not_recorded	29.067	90.392	4446	2.33	0.2327	25.25	7	2.37	2.09	0.701966	17.6912	3.37623
P619	619	F730-R1101	1	SRR15196249	Xiong_2023_EcoInd	Aquatic	Polar	Sediments	7	Not_recorded	28.893	90.174	5090	-2.72	0.2483	20.83	7	2.37	2.09	0.988389	23.2976	2.39784
P620	620	F730-R1101	1	SRR15196238	Xiong_2023_EcoInd	Aquatic	Arid	Sediments	7	Not_recorded	28.867	90.068	4554	1.63	0.2087	22.33	7	2.37	2.09	0.988389	23.2976	2.39784
P621	621	F730-R1101	1	SRR15196227	Xiong_2023_EcoInd	Aquatic	Arid	Sediments	7	Not_recorded	29.326	89.46	3783	6.25	0.2543	31.33	6.9	0.24	0.22	0.753834	18.7064	0.318372
P622	622	F730-R1101	1	SRR15196216	Xiong_2023_EcoInd	Aquatic	Cold	Sediments	7	Not_recorded	29.507	86.28	4809	0.6	0.2119	20.17	7	2.37	2.09	0.875475	21.0874	2.7071
P623	623	F730-R1101	1	SRR15196282	Xiong_2023_EcoInd	Aquatic	Polar	Sediments	7	Not_recorded	29.564	84.852	4630	1.73	0.2374	21.92	7	2.37	2.09	0.79013	19.4169	2.99951
P624	624	F730-R1101	1	SRR15196271	Xiong_2023_EcoInd	Aquatic	Polar	Sediments	7	Not_recorded	29.824	84.039	4646	1.53	0.246	22.25	7.2	0.98	1.85	0.650945	16.6925	1.5055
P625	625	F730-R1101	1	SRR15196260	Xiong_2023_EcoInd	Aquatic	Polar	Sediments	7	Not_recorded	29.872	83.74	4583	1.97	0.2707	23.92	5.1	15.48	6.08	0.652476	16.7225	23.725
P626	626	F730-R1101	1	SRR15196251	Xiong_2023_EcoInd	Aquatic	Cold	Sediments	7	Not_recorded	30.908	81.324	4601	0.13	0.3988	36	5.1	15.48	6.08	0.656537	16.802	23.5782
P627	627	F730-R1101	1	SRR15196250	Xiong_2023_EcoInd	Aquatic	Cold	Sediments	7	Not_recorded	31.463	80.47	4613	-0.83	0.3353	31.42	7	2.37	2.09	0.909386	21.7512	2.60616
P628	628	F730-R1101	1	SRR15196248	Xiong_2023_EcoInd	Aquatic	Arid	Sediments	7	Not_recorded	33.438	79.774	4271	0.14	0.0312	3.42	8	1.05	1.02	0.843941	20.4702	1.24416
P629	629	F730-R1101	1	SRR15196247	Xiong_2023_EcoInd	Aquatic	Arid	Sediments	7	Not_recorded	32.394	81.083	4519	-0.7	0.072	7.58	5.1	15.48	6.08	0.890725	21.386	17.3791
P630	630	F730-R1101	1	SRR15196246	Xiong_2023_EcoInd	Aquatic	Arid	Sediments	7	Not_recorded	32.245	82.214	4412	0.31	0.0775	8.17	8.3	0.45	0.6	0.975796	23.0511	0.461162
P631	631	F730-R1101	1	SRR15196245	Xiong_2023_EcoInd	Aquatic	Arid	Sediments	7	Not_recorded	32.412	82.979	4411	0.49	0.058	6.42	5.1	15.48	6.08	0.807549	19.7579	19.1691
P632	632	F730-R1101	1	SRR15196244	Xiong_2023_EcoInd	Aquatic	Arid	Sediments	7	Not_recorded	32.435	83.17	4449	0.22	0.0623	6.75	5.1	15.48	6.08	0.852434	20.6364	18.1598
P633	633	F730-R1101	1	SRR15196243	Xiong_2023_EcoInd	Aquatic	Arid	Sediments	7	Not_recorded	32.169	84.692	4395	0.58	0.0756	8.25	5.1	15.48	6.08	0.642985	16.5367	24.0752
P634	634	F730-R1101	1	SRR15196242	Xiong_2023_EcoInd	Aquatic	Arid	Sediments	7	Not_recorded	31.942	86.99	4479	1.33	0.1498	17.5	8.3	0.45	0.6	0.672495	17.1143	0.669149
P635	635	F730-R1101	1	SRR15196241	Xiong_2023_EcoInd	Aquatic	Arid	Sediments	7	Not_recorded	31.851	87.604	4473	1.37	0.1941	22.42	5.6	16.1	5.28	0.62961	16.2749	25.5714
P636	636	F730-R1101	1	SRR15196240	Xiong_2023_EcoInd	Aquatic	Cold	Sediments	7	Not_recorded	31.7	88.743	4574	0.98	0.2876	31.25	6	16.1	5.28	0.632601	16.3334	25.4505
P637	637	F730-R1101	1	SRR15196239	Xiong_2023_EcoInd	Aquatic	Cold	Sediments	7	Not_recorded	31.336	90.315	4611	-0.08	0.3489	35.75	7	16.1	5.28	0.67381	17.1401	23.894
P638	638	F730-R1101	1	SRR15196237	Xiong_2023_EcoInd	Aquatic	Cold	Sediments	7	Not_recorded	31.405	90.916	4541	-0.03	0.3466	35.42	5.1	15.48	6.08	0.608864	15.8688	25.4244
P639	639	F730-R1101	1	SRR15196236	Xiong_2023_EcoInd	Aquatic	Cold	Sediments	7	Not_recorded	31.574	91.884	4632	-1.48	0.3825	35.5	6.6	6.5	6.83	0.70161	17.6842	9.2644
P640	640	F730-R1101	1	SRR15196235	Xiong_2023_EcoInd	Aquatic	Cold	Sediments	7	Not_recorded	30.5	91.145	4319	2.13	0.3107	34.83	6.7	6.56	4.6	0.839262	20.3786	7.81639
P641	641	F730-R1101	1	SRR15196234	Xiong_2023_EcoInd	Aquatic	Cold	Sediments	7	Not_recorded	30.478	91.091	4279	2.61	0.3021	35.08	7.1	2.24	2.15	0.839262	20.3786	2.66901
P642	642	F730-R1101	1	SRR15196233	Xiong_2023_EcoInd	Aquatic	Cold	Sediments	7	Not_recorded	30.379	90.924	4222	3.02	0.2932	34.75	7.1	2.24	2.15	0.988951	23.3086	2.26503
P643	643	F730-R1101	1	SRR15196232	Xiong_2023_EcoInd	Aquatic	Arid	Sediments	7	Not_recorded	30.097	90.512	4310	2.81	0.2892	32.92	6.9	2.38	3.61	0.988951	23.3086	2.40659
P644	644	F730-R1101	1	SRR15196231	Xiong_2023_EcoInd	Aquatic	Cold	Sediments	7	Not_recorded	29.067	90.392	4446	2.33	0.2327	25.25	7	2.38	3.61	0.701966	17.6912	3.39048
P645	645	F730-R1101	1	SRR15196230	Xiong_2023_EcoInd	Aquatic	Polar	Sediments	7	Not_recorded	28.893	90.174	5090	-2.72	0.2483	20.83	7	2.37	2.09	0.988389	23.2976	2.39784
P646	646	F730-R1101	1	SRR15196229	Xiong_2023_EcoInd	Aquatic	Arid	Sediments	7	Not_recorded	28.867	90.068	4554	1.63	0.2087	22.33	7	2.37	2.09	0.988389	23.2976	2.39784
P647	647	F730-R1101	1	SRR15196228	Xiong_2023_EcoInd	Aquatic	Arid	Sediments	7	Not_recorded	29.326	89.46	3783	6.25	0.2543	31.33	6.9	0.24	0.22	0.753834	18.7064	0.318372
P648	648	F730-R1101	1	SRR15196226	Xiong_2023_EcoInd	Aquatic	Cold	Sediments	7	Not_recorded	29.507	86.28	4809	0.6	0.2119	20.17	7	2.37	2.09	0.875475	21.0874	2.7071
P649	649	F730-R1101	1	SRR15196225	Xiong_2023_EcoInd	Aquatic	Polar	Sediments	7	Not_recorded	29.564	84.852	4630	1.73	0.2374	21.92	7	2.37	2.09	0.79013	19.4169	2.99951
P650	650	F730-R1101	1	SRR15196224	Xiong_2023_EcoInd	Aquatic	Polar	Sediments	7	Not_recorded	29.824	84.039	4646	1.53	0.246	22.25	7.2	0.98	1.85	0.650945	16.6925	1.5055
P651	651	F730-R1101	1	SRR15196223	Xiong_2023_EcoInd	Aquatic	Polar	Sediments	7	Not_recorded	29.872	83.74	4583	1.97	0.2707	23.92	5.1	15.48	6.08	0.652476	16.7225	23.725
P652	652	F730-R1101	1	SRR15196222	Xiong_2023_EcoInd	Aquatic	Cold	Sediments	7	Not_recorded	30.908	81.324	4601	0.13	0.3988	36	5.1	15.48	6.08	0.656537	16.802	23.5782
P653	653	F730-R1101	1	SRR15196221	Xiong_2023_EcoInd	Aquatic	Cold	Sediments	7	Not_recorded	31.463	80.47	4613	-0.83	0.3353	31.42	7	2.37	2.09	0.909386	21.7512	2.60616
P654	654	F730-R1101	1	SRR15196220	Xiong_2023_EcoInd	Aquatic	Arid	Sediments	7	Not_recorded	33.438	79.774	4271	0.14	0.0312	3.42	8	1.05	1.02	0.843941	20.4702	1.24416
P655	655	F730-R1101	1	SRR15196219	Xiong_2023_EcoInd	Aquatic	Arid	Sediments	7	Not_recorded	32.394	81.083	4519	-0.7	0.072	7.58	5.1	15.48	6.08	0.890725	21.386	17.3791
P656	656	F730-R1101	1	SRR15196218	Xiong_2023_EcoInd	Aquatic	Arid	Sediments	7	Not_recorded	32.245	82.214	4412	0.31	0.0775	8.17	8.3	0.45	0.6	0.975796	23.0511	0.461162
P657	657	F730-R1101	1	SRR15196217	Xiong_2023_EcoInd	Aquatic	Arid	Sediments	7	Not_recorded	32.412	82.979	4411	0.49	0.058	6.42	5.1	15.48	6.08	0.807549	19.7579	19.1691
P658	658	F730-R1101	1	SRR15196215	Xiong_2023_EcoInd	Aquatic	Arid	Sediments	7	Not_recorded	32.435	83.17	4449	0.22	0.0623	6.75	5.1	15.48	6.08	0.852434	20.6364	18.1598
P659	659	F730-R1101	1	SRR15196214	Xiong_2023_EcoInd	Aquatic	Arid	Sediments	7	Not_recorded	32.169	84.692	4395	0.58	0.0756	8.25	5.1	15.48	6.08	0.642985	16.5367	24.0752
P660	660	F730-R1101	1	SRR15196213	Xiong_2023_EcoInd	Aquatic	Arid	Sediments	7	Not_recorded	31.942	86.99	4479	1.33	0.1498	17.5	8.3	0.45	0.6	0.672495	17.1143	0.669149
P661	661	F730-R1101	1	SRR15196212	Xiong_2023_EcoInd	Aquatic	Arid	Sediments	7	Not_recorded	31.851	87.604	4473	1.37	0.1941	22.42	5.6	16.1	5.28	0.62961	16.2749	25.5714
P662	662	F730-R1101	1	SRR15196211	Xiong_2023_EcoInd	Aquatic	Cold	Sediments	7	Not_recorded	31.7	88.743	4574	0.98	0.2876	31.25	7	16.1	5.28	0.632601	16.3334	25.4505
P663	663	F730-R1101	1	SRR15196210	Xiong_2023_EcoInd	Aquatic	Cold	Sediments	7	Not_recorded	31.336	90.315	4611	-0.08	0.3489	35.75	7	16.1	5.28	0.67381	17.1401	23.894
P664	664	F730-R1101	1	SRR15196209	Xiong_2023_EcoInd	Aquatic	Cold	Sediments	7	Not_recorded	31.405	90.916	4541	-0.03	0.3466	35.42	5.1	15.48	6.08	0.608864	15.8688	25.4244
P665	665	F730-R1101	1	SRR15196208	Xiong_2023_EcoInd	Aquatic	Cold	Sediments	7	Not_recorded	31.574	91.884	4632	-1.48	0.3825	35.5	6.6	6.5	6.83	0.70161	17.6842	9.2644
P666	666	F730-R1101	1	SRR15196207	Xiong_2023_EcoInd	Aquatic	Cold	Sediments	7	Not_recorded	30.5	91.145	4319	2.13	0.3107	34.83	6.7	6.56	4.6	0.839262	20.3786	7.81639
P667	667	F730-R1101	1	SRR15196206	Xiong_2023_EcoInd	Aquatic	Cold	Sediments	7	Not_recorded	30.478	91.091	4279	2.61	0.3021	35.08	7.1	2.24	2.15	0.839262	20.3786	2.66901
P668	668	F730-R1101	1	SRR15196281	Xiong_2023_EcoInd	Aquatic	Cold	Sediments	7	Not_recorded	30.379	90.924	4222	3.02	0.2932	34.75	7.1	2.24	2.15	0.988951	23.3086	2.26503
P669	669	F730-R1101	1	SRR15196280	Xiong_2023_EcoInd	Aquatic	Arid	Sediments	7	Not_recorded	30.097	90.512	4310	2.81	0.2892	32.92	6.9	2.38	3.61	0.988951	23.3086	2.40659
P670	670	F730-R1101	1	SRR15196279	Xiong_2023_EcoInd	Aquatic	Cold	Sediments	7	Not_recorded	29.067	90.392	4446	2.33	0.2327	25.25	7	2.38	3.61	0.701966	17.6912	3.39048
P671	671	F730-R1101	1	SRR15196278	Xiong_2023_EcoInd	Aquatic	Polar	Sediments	7	Not_recorded	28.893	90.174	5090	-2.72	0.2483	20.83	7	2.37	2.09	0.988389	23.2976	2.39784
P672	672	F730-R1101	1	SRR15196277	Xiong_2023_EcoInd	Aquatic	Arid	Sediments	7	Not_recorded	28.867	90.068	4554	1.63	0.2087	22.33	7	2.37	2.09	0.988389	23.2976	2.39784
P673	673	F730-R1101	1	SRR15196276	Xiong_2023_EcoInd	Aquatic	Arid	Sediments	7	Not_recorded	29.326	89.46	3783	6.25	0.2543	31.33	6.9	0.24	0.22	0.753834	18.7064	0.318372
P674	674	F730-R1101	1	SRR15196275	Xiong_2023_EcoInd	Aquatic	Cold	Sediments	7	Not_recorded	29.507	86.28	4809	0.6	0.2119	20.17	7	2.37	2.09	0.875475	21.0874	2.7071
P675	675	F730-R1101	1	SRR15196274	Xiong_2023_EcoInd	Aquatic	Polar	Sediments	7	Not_recorded	29.564	84.852	4630	1.73	0.2374	21.92	7	2.37	2.09	0.79013	19.4169	2.99951
P676	676	F730-R1101	1	SRR15196273	Xiong_2023_EcoInd	Aquatic	Polar	Sediments	7	Not_recorded	29.824	84.039	4646	1.53	0.246	22.25	7.2	0.98	1.85	0.650945	16.6925	1.5055
P677	677	F730-R1101	1	SRR15196272	Xiong_2023_EcoInd	Aquatic	Polar	Sediments	7	Not_recorded	29.872	83.74	4583	1.97	0.2707	23.92	5.1	15.48	6.08	0.652476	16.7225	23.725
P678	678	F730-R1101	1	SRR15196270	Xiong_2023_EcoInd	Aquatic	Cold	Sediments	7	Not_recorded	30.908	81.324	4601	0.13	0.3988	36	5.1	15.48	6.08	0.656537	16.802	23.5782
P679	679	F730-R1101	1	SRR15196269	Xiong_2023_EcoInd	Aquatic	Cold	Sediments	7	Not_recorded	31.463	80.47	4613	-0.83	0.3353	31.42	7	2.37	2.09	0.909386	21.7512	2.60616
P680	680	F730-R1101	1	SRR15196268	Xiong_2023_EcoInd	Aquatic	Arid	Sediments	7	Not_recorded	33.438	79.774	4271	0.14	0.0312	3.42	8	1.05	1.02	0.843941	20.4702	1.24416
P681	681	F730-R1101	1	SRR15196267	Xiong_2023_EcoInd	Aquatic	Arid	Sediments	7	Not_recorded	32.394	81.083	4519	-0.7	0.072	7.58	5.1	15.48	6.08	0.890725	21.386	17.3791
P682	682	F730-R1101	1	SRR15196266	Xiong_2023_EcoInd	Aquatic	Arid	Sediments	7	Not_recorded	32.245	82.214	4412	0.31	0.0775	8.17	8.3	0.45	0.6	0.975796	23.0511	0.461162
P683	683	F730-R1101	1	SRR15196265	Xiong_2023_EcoInd	Aquatic	Arid	Sediments	7	Not_recorded	32.412	82.979	4411	0.49	0.058	6.42	5.1	15.48	6.08	0.807549	19.7579	19.1691
P684	684	F730-R1101	1	SRR15196264	Xiong_2023_EcoInd	Aquatic	Arid	Sediments	7	Not_recorded	32.435	83.17	4449	0.22	0.0623	6.75	5.1	15.48	6.08	0.852434	20.6364	18.1598
P685	685	F730-R1101	1	SRR15196263	Xiong_2023_EcoInd	Aquatic	Arid	Sediments	7	Not_recorded	32.169	84.692	4395	0.58	0.0756	8.25	5.1	15.48	6.08	0.642985	16.5367	24.0752
P686	686	F730-R1101	1	SRR15196262	Xiong_2023_EcoInd	Aquatic	Arid	Sediments	7	Not_recorded	31.942	86.99	4479	1.33	0.1498	17.5	8.3	0.45	0.6	0.672495	17.1143	0.669149
P687	687	F730-R1101	1	SRR15196261	Xiong_2023_EcoInd	Aquatic	Arid	Sediments	7	Not_recorded	31.851	87.604	4473	1.37	0.1941	22.42	5.6	16.1	5.28	0.62961	16.2749	25.5714
P688	688	F730-R1101	1	SRR15196259	Xiong_2023_EcoInd	Aquatic	Cold	Sediments	7	Not_recorded	31.7	88.743	4574	0.98	0.2876	31.25	5.1	16.1	5.28	0.632601	16.3334	25.4505
P689	689	F730-R1101	1	SRR15196258	Xiong_2023_EcoInd	Aquatic	Cold	Sediments	7	Not_recorded	31.336	90.315	4611	-0.08	0.3489	35.75	6.6	16.1	5.28	0.67381	17.1401	23.894
P690	690	F730-R1101	1	SRR15196257	Xiong_2023_EcoInd	Aquatic	Cold	Sediments	7	Not_recorded	31.405	90.916	4541	-0.03	0.3466	35.42	5.1	15.48	6.08	0.608864	15.8688	25.4244
P691	691	F730-R1101	1	SRR15196256	Xiong_2023_EcoInd	Aquatic	Cold	Sediments	7	Not_recorded	31.574	91.884	4632	-1.48	0.3825	35.5	6.6	6.5	6.83	0.70161	17.6842	9.2644
P692	692	F730-R1101	1	SRR15196255	Xiong_2023_EcoInd	Aquatic	Cold	Sediments	7	Not_recorded	30.5	91.145	4319	2.13	0.3107	34.83	6.7	6.56	4.6	0.839262	20.3786	7.81639
P693	693	F730-R1101	1	SRR15196254	Xiong_2023_EcoInd	Aquatic	Cold	Sediments	7	Not_recorded	30.478	91.091	4279	2.61	0.3021	35.08	7.1	2.24	2.15	0.839262	20.3786	2.66901
P694	694	F730-R1101	1	SRR15196253	Xiong_2023_EcoInd	Aquatic	Cold	Sediments	7	Not_recorded	30.379	90.924	4222	3.02	0.2932	34.75	7.1	2.24	2.15	0.988951	23.3086	2.26503
P695	695	F730-R1101	1	SRR15196252	Xiong_2023_EcoInd	Aquatic	Arid	Sediments	7	Not_recorded	30.097	90.512	4310	2.81	0.2892	32.92	6.9	2.38	3.61	0.988951	23.3086	2.40659
P696	696	F730-R1101	1	SRR9615468	Sun_2021_AMB	Croplands	Temperate	Croplands	4	rice	28.5511	113.331	88	17.5	1.1574	1330	5.01772	19.2824	1.93787	0.502609	10.8294	38.3645
P697	697	F730-R1101	1	SRR9615467	Sun_2021_AMB	Croplands	Temperate	Croplands	4	rice	28.5511	113.331	88	17.5	1.1574	1330	5.05569	19.2033	1.91384	0.492655	9.76138	38.9791
P698	698	F730-R1101	1	SRR9615470	Sun_2021_AMB	Croplands	Temperate	Croplands	4	rice	28.5511	113.331	88	17.5	1.1574	1330	5.05047	19.1905	1.78423	0.496205	11.0094	38.6746
P699	699	F730-R1101	1	SRR9615469	Sun_2021_AMB	Croplands	Temperate	Croplands	4	rice	28.5511	113.331	88	17.5	1.1574	1330	5.11006	23.331	1.98066	0.451582	11.2668	51.665
P700	700	F730-R1101	1	SRR9615464	Sun_2021_AMB	Croplands	Temperate	Croplands	4	rice	28.5511	113.331	88	17.5	1.1574	1330	6.14194	24.9602	1.94847	0.461301	9.44871	54.1084
P701	701	F730-R1101	1	SRR9615463	Sun_2021_AMB	Croplands	Temperate	Croplands	4	rice	28.5511	113.331	88	17.5	1.1574	1330	4.8839	26.1028	2.16201	0.461822	9.98813	56.5212
P702	702	F730-R1101	1	SRR9615466	Sun_2021_AMB	Croplands	Temperate	Croplands	4	rice	28.5511	113.331	88	17.5	1.1574	1330	4.90809	19.2825	1.64762	0.441216	9.746	43.7031
P703	703	F730-R1101	1	SRR9615465	Sun_2021_AMB	Croplands	Temperate	Croplands	4	rice	28.5511	113.331	88	17.5	1.1574	1330	4.90608	18.5467	1.62391	0.452343	11.3932	41.0015
P704	704	F730-R1101	1	SRR9615462	Sun_2021_AMB	Croplands	Temperate	Croplands	4	rice	28.5511	113.331	88	17.5	1.1574	1330	4.98502	17.158	1.5069	0.451424	9.84758	38.0087
P705	705	F730-R1101	1	SRR9615461	Sun_2021_AMB	Croplands	Temperate	Croplands	4	rice	28.5511	113.331	88	17.5	1.1574	1330	4.80651	20.6317	3.12284	0.443757	11.508	46.4932
P706	706	F730-R1101	1	SRR9615480	Sun_2021_AMB	Croplands	Temperate	Croplands	4	rice	28.5511	113.331	88	17.5	1.1574	1330	4.86915	20.9164	1.97286	0.440329	11.7056	47.5017
P707	707	F730-R1101	1	SRR9615479	Sun_2021_AMB	Croplands	Temperate	Croplands	4	rice	28.5511	113.331	88	17.5	1.1574	1330	4.77615	21.7762	2.99857	0.448148	11.4618	48.5915
P708	708	F730-R1101	1	SRR9615478	Sun_2021_AMB	Croplands	Temperate	Croplands	4	rice	28.5511	113.331	88	17.5	1.1574	1330	5.09139	19.6535	2.03702	0.492309	12.0474	39.9211
P709	709	F730-R1101	1	SRR9615477	Sun_2021_AMB	Croplands	Temperate	Croplands	4	rice	28.5511	113.331	88	17.5	1.1574	1330	5.12481	18.6278	2.22911	0.495415	11.9173	37.6005
P710	710	F730-R1101	1	SRR9615476	Sun_2021_AMB	Croplands	Temperate	Croplands	4	rice	28.5511	113.331	88	17.5	1.1574	1330	5.12003	18.7127	2.15021	0.492824	11.7218	37.9704
P711	711	F730-R1101	1	SRR9615475	Sun_2021_AMB	Croplands	Temperate	Croplands	4	rice	28.5511	113.331	88	17.5	1.1574	1330	5.11369	24.0136	2.39979	0.454089	10.595	52.8831
P712	712	F730-R1101	1	SRR9615474	Sun_2021_AMB	Croplands	Temperate	Croplands	4	rice	28.5511	113.331	88	17.5	1.1574	1330	5.141	22.2998	2.41051	0.455564	13.3882	48.9498
P713	713	F730-R1101	1	SRR9615473	Sun_2021_AMB	Croplands	Temperate	Croplands	4	rice	28.5511	113.331	88	17.5	1.1574	1330	4.86153	20.2284	2.28625	0.463021	9.14879	43.6877
P714	714	F730-R1101	1	SRR9615472	Sun_2021_AMB	Croplands	Temperate	Croplands	4	rice	28.5511	113.331	88	17.5	1.1574	1330	5.21223	18.3652	1.87351	0.448061	10.3546	40.9882
P715	715	F730-R1101	1	SRR9615471	Sun_2021_AMB	Croplands	Temperate	Croplands	4	rice	28.5511	113.331	88	17.5	1.1574	1330	5.17515	17.4562	1.8411	0.469694	12.0529	37.1651
P716	716	F730-R1101	1	SRR9615459	Sun_2021_AMB	Croplands	Temperate	Croplands	4	rice	28.5511	113.331	88	17.5	1.1574	1330	5.05975	17.6821	1.84306	0.450398	10.6167	39.2589
P717	717	F730-R1101	1	SRR9615460	Sun_2021_AMB	Croplands	Temperate	Croplands	4	rice	28.5511	113.331	88	17.5	1.1574	1330	5.16432	19.1137	2.19485	0.441967	12.5596	43.247
P718	718	F730-R1101	1	SRR9615457	Sun_2021_AMB	Croplands	Temperate	Croplands	4	rice	28.5511	113.331	88	17.5	1.1574	1330	5.12202	20.3119	2.29824	0.450015	12.7179	45.1361
P719	719	F730-R1101	1	SRR9615458	Sun_2021_AMB	Croplands	Temperate	Croplands	4	rice	28.5511	113.331	88	17.5	1.1574	1330	4.9586	24.1865	2.31978	0.449492	12.7031	53.8085
P720	720	F730-R1101	1	SRR6122477	Wei_2019_SBB	Croplands	Temperate	Croplands	4	rice	28.5511	113.331	88	17.5	1.1574	1330	6.40563	13.9002	1.45	0.755	11	18.4108
P721	721	F730-R1101	1	SRR6122478	Wei_2019_SBB	Croplands	Temperate	Croplands	4	rice	28.5511	113.331	88	17.5	1.1574	1330	6.01037	13.4196	1.45	0.755	10.2	17.7743
P722	722	F730-R1101	1	SRR6122479	Wei_2019_SBB	Croplands	Temperate	Croplands	4	rice	28.5511	113.331	88	17.5	1.1574	1330	5.48863	14.159	1.45	0.755	9.04	18.7536
P723	723	F730-R1101	1	SRR6122480	Wei_2019_SBB	Croplands	Temperate	Croplands	4	rice	28.5511	113.331	88	17.5	1.1574	1330	5.88812	14.085	1.45	0.755	23.5	18.6557
P724	724	F730-R1101	1	SRR6122473	Wei_2019_SBB	Croplands	Temperate	Croplands	4	rice	28.5511	113.331	88	17.5	1.1574	1330	5.57192	13.2717	1.45	0.755	23.2	17.5784
P725	725	F730-R1101	1	SRR6122474	Wei_2019_SBB	Croplands	Temperate	Croplands	4	rice	28.5511	113.331	88	17.5	1.1574	1330	5.25571	14.3438	1.45	0.755	22.6	18.9984
P726	726	F730-R1101	1	SRR6122475	Wei_2019_SBB	Croplands	Temperate	Croplands	4	rice	28.5511	113.331	88	17.5	1.1574	1330	6.04117	14.2699	1.45	0.755	10.7	18.9005
P727	727	F730-R1101	1	SRR6122476	Wei_2019_SBB	Croplands	Temperate	Croplands	4	rice	28.5511	113.331	88	17.5	1.1574	1330	5.70927	13.9741	1.45	0.755	10.7	18.5088
P728	728	F730-R1101	1	SRR6122470	Wei_2019_SBB	Croplands	Temperate	Croplands	4	rice	28.5511	113.331	88	17.5	1.1574	1330	5.4405	13.5305	1.45	0.755	10.7	17.9212
P729	729	F730-R1101	1	SRR6122471	Wei_2019_SBB	Croplands	Temperate	Croplands	4	rice	28.5511	113.331	88	17.5	1.1574	1330	5.91892	13.8262	1.45	0.755	22.6	18.3129
P730	730	F730-R1101	1	SRR6122492	Wei_2019_SBB	Croplands	Temperate	Croplands	4	rice	28.5511	113.331	88	17.5	1.1574	1330	5.60277	13.4935	1.45	0.755	23.7	17.8722
P731	731	F730-R1101	1	SRR6122493	Wei_2019_SBB	Croplands	Temperate	Croplands	4	rice	28.5511	113.331	88	17.5	1.1574	1330	5.28657	14.3808	1.45	0.755	25	19.0474
P732	732	F730-R1101	1	SRR6122494	Wei_2019_SBB	Croplands	Temperate	Croplands	4	rice	28.5511	113.331	88	17.5	1.1574	1330	6.96011	13.9002	1.45	0.835	22.5	16.6469
P733	733	F730-R1101	1	SRR6122495	Wei_2019_SBB	Croplands	Temperate	Croplands	4	rice	28.5511	113.331	88	17.5	1.1574	1330	6.72313	13.4566	1.45	0.835	23.8	16.1156
P734	734	F730-R1101	1	SRR6122496	Wei_2019_SBB	Croplands	Temperate	Croplands	4	rice	28.5511	113.331	88	17.5	1.1574	1330	6.35938	14.5287	1.45	0.835	23.5	17.3996
P735	735	F730-R1101	1	SRR6122497	Wei_2019_SBB	Croplands	Temperate	Croplands	4	rice	28.5511	113.331	88	17.5	1.1574	1330	6.53752	13.8262	1.45	0.835	24	16.5584
P736	736	F730-R1101	1	SRR6122498	Wei_2019_SBB	Croplands	Temperate	Croplands	4	rice	28.5511	113.331	88	17.5	1.1574	1330	6.25294	13.5305	1.45	0.835	8.67	16.2042
P737	737	F730-R1101	1	SRR6122499	Wei_2019_SBB	Croplands	Temperate	Croplands	4	rice	28.5511	113.331	88	17.5	1.1574	1330	5.8575	13.7893	1.45	0.835	8.67	16.5141
P738	738	F730-R1101	1	SRR6122484	Wei_2019_SBB	Croplands	Temperate	Croplands	4	rice	28.5511	113.331	88	17.5	1.1574	1330	6.78561	13.9002	1.45	0.835	9.47	16.6469
P739	739	F730-R1101	1	SRR6122485	Wei_2019_SBB	Croplands	Temperate	Croplands	4	rice	28.5511	113.331	88	17.5	1.1574	1330	6.59582	13.1608	1.45	0.835	22.6	15.7615
P740	740	F730-R1101	1	SRR6122464	Wei_2019_SBB	Croplands	Temperate	Croplands	4	rice	28.5511	113.331	88	17.5	1.1574	1330	6.35873	14.0481	1.45	0.835	22.8	16.824
P741	741	F730-R1101	1	SRR6122463	Wei_2019_SBB	Croplands	Temperate	Croplands	4	rice	28.5511	113.331	88	17.5	1.1574	1330	6.52106	14.0111	1.45	0.835	9.22	16.7797
P742	742	F730-R1101	1	SRR6122466	Wei_2019_SBB	Croplands	Temperate	Croplands	4	rice	28.5511	113.331	88	17.5	1.1574	1330	6.39446	13.6414	1.45	0.835	10.6	16.337
P743	743	F730-R1101	1	SRR6122465	Wei_2019_SBB	Croplands	Temperate	Croplands	4	rice	28.5511	113.331	88	17.5	1.1574	1330	6.26798	13.9741	1.45	0.835	9.99	16.7355
P744	744	F730-R1101	1	SRR6122460	Wei_2019_SBB	Croplands	Temperate	Croplands	4	rice	28.5511	113.331	88	17.5	1.1574	1330	5.86062	13.4196	1.45	0.755	4.51	17.7743
P745	745	F730-R1101	1	SRR6122459	Wei_2019_SBB	Croplands	Temperate	Croplands	4	rice	28.5511	113.331	88	17.5	1.1574	1330	5.59184	13.2348	1.45	0.755	3.85	17.5295
P746	746	F730-R1101	1	SRR6122462	Wei_2019_SBB	Croplands	Temperate	Croplands	4	rice	28.5511	113.331	88	17.5	1.1574	1330	5.22821	13.8262	1.45	0.755	4.21	18.3129
P747	747	F730-R1101	1	SRR6122461	Wei_2019_SBB	Croplands	Temperate	Croplands	4	rice	28.5511	113.331	88	17.5	1.1574	1330	5.73825	13.6044	1.45	0.755	3.78	18.0191
P748	748	F730-R1101	1	SRR6122468	Wei_2019_SBB	Croplands	Temperate	Croplands	4	rice	28.5511	113.331	88	17.5	1.1574	1330	6.89357	13.2348	1.45	0.755	3.6	17.5295
P749	749	F730-R1101	1	SRR6122467	Wei_2019_SBB	Croplands	Temperate	Croplands	4	rice	28.5511	113.331	88	17.5	1.1574	1330	6.60911	14.085	1.45	0.755	2.88	18.6557
P750	750	F730-R1101	1	SRR6122490	Wei_2019_SBB	Croplands	Temperate	Croplands	4	rice	28.5511	113.331	88	17.5	1.1574	1330	6.20762	13.6784	1.45	0.755	4.93	18.1171
P751	751	F730-R1101	1	SRR6122491	Wei_2019_SBB	Croplands	Temperate	Croplands	4	rice	28.5511	113.331	88	17.5	1.1574	1330	6.04952	13.3457	1.45	0.755	5.11	17.6764
P752	752	F730-R1101	1	SRR6122488	Wei_2019_SBB	Croplands	Temperate	Croplands	4	rice	28.5511	113.331	88	17.5	1.1574	1330	5.84398	13.6784	1.45	0.755	5.11	18.1171
P753	753	F730-R1101	1	SRR6122489	Wei_2019_SBB	Croplands	Temperate	Croplands	4	rice	28.5511	113.331	88	17.5	1.1574	1330	6.27498	13.4196	1.45	0.755	3.65	17.7743
P754	754	F730-R1101	1	SRR6122486	Wei_2019_SBB	Croplands	Temperate	Croplands	4	rice	28.5511	113.331	88	17.5	1.1574	1330	5.89571	13.1238	1.45	0.755	12.1	17.3826
P755	755	F730-R1101	1	SRR6122487	Wei_2019_SBB	Croplands	Temperate	Croplands	4	rice	28.5511	113.331	88	17.5	1.1574	1330	6.45012	14.0481	1.45	0.755	11.9	18.6067
P756	756	F730-R1101	1	SRR6122455	Wei_2019_SBB	Croplands	Temperate	Croplands	4	rice	28.5511	113.331	88	17.5	1.1574	1330	6.88964	13.4196	1.45	0.835	9.64	16.0714
P757	757	F730-R1101	1	SRR6122456	Wei_2019_SBB	Croplands	Temperate	Croplands	4	rice	28.5511	113.331	88	17.5	1.1574	1330	6.14638	12.939	1.45	0.835	9.75	15.4958
P758	758	F730-R1101	1	SRR6122472	Wei_2019_SBB	Croplands	Temperate	Croplands	4	rice	28.5511	113.331	88	17.5	1.1574	1330	6.05445	13.9002	1.45	0.835	9.76	16.6469
P759	759	F730-R1101	1	SRR6122482	Wei_2019_SBB	Croplands	Temperate	Croplands	4	rice	28.5511	113.331	88	17.5	1.1574	1330	6.22972	13.8262	1.45	0.835	11.6	16.5584
P760	760	F730-R1101	1	SRR6122454	Wei_2019_SBB	Croplands	Temperate	Croplands	4	rice	28.5511	113.331	88	17.5	1.1574	1330	6.60911	13.4196	1.45	0.835	11.7	16.0714
P761	761	F730-R1101	1	SRR6122457	Wei_2019_SBB	Croplands	Temperate	Croplands	4	rice	28.5511	113.331	88	17.5	1.1574	1330	6.22972	13.8262	1.45	0.835	11.3	16.5584
P762	762	F730-R1101	1	SRR6122481	Wei_2019_SBB	Croplands	Temperate	Croplands	4	rice	28.5511	113.331	88	17.5	1.1574	1330	6.66729	14.159	1.45	0.835	10.5	16.9568
P763	763	F730-R1101	1	SRR6122452	Wei_2019_SBB	Croplands	Temperate	Croplands	4	rice	28.5511	113.331	88	17.5	1.1574	1330	6.52518	13.8632	1.45	0.835	10.7	16.6027
P764	764	F730-R1101	1	SRR6122453	Wei_2019_SBB	Croplands	Temperate	Croplands	4	rice	28.5511	113.331	88	17.5	1.1574	1330	6.24047	13.4566	1.45	0.835	10.4	16.1156
P765	765	F730-R1101	1	SRR6122483	Wei_2019_SBB	Croplands	Temperate	Croplands	4	rice	28.5511	113.331	88	17.5	1.1574	1330	6.05422	13.9002	1.45	0.835	10.7	16.6469
P766	766	F730-R1101	1	SRR6122469	Wei_2019_SBB	Croplands	Temperate	Croplands	4	rice	28.5511	113.331	88	17.5	1.1574	1330	6.37119	13.6414	1.45	0.835	11.3	16.337
P767	767	F730-R1101	1	SRR6122458	Wei_2019_SBB	Croplands	Temperate	Croplands	4	rice	28.5511	113.331	88	17.5	1.1574	1330	6.19739	14.3438	1.45	0.835	10.7	17.1782
P768	768	F730-R1101	1	P0_B1	Guo_2022_Rhizosphere	Croplands	Temperate	Croplands	4	maize	28.15	116.55	40	18.3	1.2925	1701	4.24805	14.7322	1.61123	0.299661	3.64026	49.1628
P769	769	F730-R1101	1	P0_B2	Guo_2022_Rhizosphere	Croplands	Temperate	Croplands	4	maize	28.15	116.55	40	18.3	1.2925	1701	4.35457	14.1665	1.62935	0.296985	2.95061	47.7011
P770	770	F730-R1101	1	P0_B3	Guo_2022_Rhizosphere	Croplands	Temperate	Croplands	4	maize	28.15	116.55	40	18.3	1.2925	1701	4.31031	14.294	1.62877	0.301665	3.7927	47.3836
P771	771	F730-R1101	1	P20_B1	Guo_2022_Rhizosphere	Croplands	Temperate	Croplands	4	maize	28.15	116.55	40	18.3	1.2925	1701	4.36843	14.4966	1.65	0.323568	6.09631	44.8024
P772	772	F730-R1101	1	P20_B2	Guo_2022_Rhizosphere	Croplands	Temperate	Croplands	4	maize	28.15	116.55	40	18.3	1.2925	1701	4.3965	14.1004	1.65	0.319727	5.95105	44.1012
P773	773	F730-R1101	1	P20_B3	Guo_2022_Rhizosphere	Croplands	Temperate	Croplands	4	maize	28.15	116.55	40	18.3	1.2925	1701	4.38328	14.2442	1.65	0.338499	5.85888	42.0806
P774	774	F730-R1101	1	P200_B1	Guo_2022_Rhizosphere	Croplands	Temperate	Croplands	4	maize	28.15	116.55	40	18.3	1.2925	1701	4.24271	14.833	1.62	0.398848	25.0341	37.1895
P775	775	F730-R1101	1	P200_B2	Guo_2022_Rhizosphere	Croplands	Temperate	Croplands	4	maize	28.15	116.55	40	18.3	1.2925	1701	4.28686	14.4728	1.62	0.430753	27.5366	33.5989
P776	776	F730-R1101	1	P200_B3	Guo_2022_Rhizosphere	Croplands	Temperate	Croplands	4	maize	28.15	116.55	40	18.3	1.2925	1701	4.26079	14.925	1.62	0.420248	25.0269	35.5147
P777	777	F730-R1101	1	P0_R1	Guo_2022_Rhizosphere	Croplands	Temperate	Croplands	4	maize	28.15	116.55	40	18.3	1.2925	1701	4.40105	17.4854	1.55416	0.329319	3.92816	53.0955
P778	778	F730-R1101	1	P0_R2	Guo_2022_Rhizosphere	Croplands	Temperate	Croplands	4	maize	28.15	116.55	40	18.3	1.2925	1701	4.25221	19.8468	1.55147	0.329599	3.27177	60.215
P779	779	F730-R1101	1	P0_R3	Guo_2022_Rhizosphere	Croplands	Temperate	Croplands	4	maize	28.15	116.55	40	18.3	1.2925	1701	4.32954	16.768	1.55817	0.331543	2.27294	50.5755
P780	780	F730-R1101	1	P20_R1	Guo_2022_Rhizosphere	Croplands	Temperate	Croplands	4	maize	28.15	116.55	40	18.3	1.2925	1701	4.41441	19.6971	1.63827	0.320092	6.6007	61.5358
P781	781	F730-R1101	1	P20_R2	Guo_2022_Rhizosphere	Croplands	Temperate	Croplands	4	maize	28.15	116.55	40	18.3	1.2925	1701	4.43596	20.0156	1.65433	0.322233	7.95194	62.1152
P782	782	F730-R1101	1	P20_R3	Guo_2022_Rhizosphere	Croplands	Temperate	Croplands	4	maize	28.15	116.55	40	18.3	1.2925	1701	4.33639	19.8697	1.64312	0.327467	5.19655	60.677
P783	783	F730-R1101	1	P200_R1	Guo_2022_Rhizosphere	Croplands	Temperate	Croplands	4	maize	28.15	116.55	40	18.3	1.2925	1701	4.33733	15.2838	1.46012	0.437313	20.7891	34.9494
P784	784	F730-R1101	1	P200_R2	Guo_2022_Rhizosphere	Croplands	Temperate	Croplands	4	maize	28.15	116.55	40	18.3	1.2925	1701	4.33558	12.4822	1.43857	0.433515	22.3126	28.7929
P785	785	F730-R1101	1	P200_R3	Guo_2022_Rhizosphere	Croplands	Temperate	Croplands	4	maize	28.15	116.55	40	18.3	1.2925	1701	4.37357	14.8763	1.43393	0.422938	20.7777	35.1738
P786	786	F733-R1083	2	SRR13877972	Cheng_2022_EcoEngi	Deserts	Arid	Deserts	5	Artemisia halodendron	43.02	109.45	1224	6.3	0.0849	340.5	6.55883	9.99019	0.222173	0.641666	6.94825	15.5692
P787	787	F733-R1083	2	SRR13877971	Cheng_2022_EcoEngi	Deserts	Arid	Deserts	5	Artemisia halodendron	43.02	109.45	1224	6.3	0.0849	340.5	6.99101	11.0581	0.196184	0.623862	6.37454	17.7252
P788	788	F733-R1083	2	SRR13877970	Cheng_2022_EcoEngi	Deserts	Arid	Deserts	5	Artemisia halodendron	43.02	109.45	1224	6.3	0.0849	340.5	6.98092	14.7053	0.121254	0.670397	7.20157	21.9352
P789	789	F733-R1083	2	SRR13877979	Cheng_2022_EcoEngi	Deserts	Arid	Deserts	5	C. microphylla	43.02	109.45	1224	6.3	0.0849	340.5	6.48073	15.0624	0.450098	3.03194	10.3976	4.96791
P790	790	F733-R1083	2	SRR13877978	Cheng_2022_EcoEngi	Deserts	Arid	Deserts	5	C. microphylla	43.02	109.45	1224	6.3	0.0849	340.5	6.5058	17.2992	0.346571	2.63889	9.8093	6.55548
P791	791	F733-R1083	2	SRR13877977	Cheng_2022_EcoEngi	Deserts	Arid	Deserts	5	C. microphylla	43.02	109.45	1224	6.3	0.0849	340.5	6.58801	12.8524	0.466032	2.45123	11.1791	5.24325
P792	792	F733-R1083	2	SRR13877969	Cheng_2022_EcoEngi	Deserts	Arid	Deserts	5	H. fruticosum	43.02	109.45	1224	6.3	0.0849	340.5	6.61405	15.9048	0.235131	0.76633	6.39542	20.7545
P793	793	F733-R1083	2	SRR13877984	Cheng_2022_EcoEngi	Deserts	Arid	Deserts	5	H. fruticosum	43.02	109.45	1224	6.3	0.0849	340.5	6.41284	13.6824	0.204838	0.806557	5.11266	16.964
P794	794	F733-R1083	2	SRR13877983	Cheng_2022_EcoEngi	Deserts	Arid	Deserts	5	H. fruticosum	43.02	109.45	1224	6.3	0.0849	340.5	6.82636	12.4705	0.230657	0.841215	3.52142	14.8244
P795	795	F733-R1083	2	SRR13877986	Cheng_2022_EcoEngi	Deserts	Arid	Deserts	5	P. simonii	43.02	109.45	1224	6.3	0.0849	340.5	7.10934	16.7339	0.393048	3.13493	3.21699	5.33787
P796	796	F733-R1083	2	SRR13877985	Cheng_2022_EcoEngi	Deserts	Arid	Deserts	5	P. simonii	43.02	109.45	1224	6.3	0.0849	340.5	7.00863	8.05661	0.368588	3.07718	8.14512	2.61818
P797	797	F733-R1083	2	SRR13877976	Cheng_2022_EcoEngi	Deserts	Arid	Deserts	5	P. simonii	43.02	109.45	1224	6.3	0.0849	340.5	7.11096	8.24426	0.306564	2.44955	7.10121	3.36562
P798	798	F733-R1083	2	SRR13877975	Cheng_2022_EcoEngi	Deserts	Arid	Deserts	5	P. sylvestris	43.02	109.45	1224	6.3	0.0849	340.5	5.79942	3.24307	0.388601	3.33281	28.6235	0.973073
P799	799	F733-R1083	2	SRR13877974	Cheng_2022_EcoEngi	Deserts	Arid	Deserts	5	P. sylvestris	43.02	109.45	1224	6.3	0.0849	340.5	5.46095	17.8878	0.129548	4.71931	59.4777	3.79034
P800	800	F733-R1083	2	SRR13877973	Cheng_2022_EcoEngi	Deserts	Arid	Deserts	5	P. sylvestris	43.02	109.45	1224	6.3	0.0849	340.5	5.02028	5.46121	0.203217	2.86438	4.03992	1.90659
P801	801	F733-R1083	2	SRR13877982	Cheng_2022_EcoEngi	Deserts	Arid	Deserts	5	Salix gordejevii	43.02	109.45	1224	6.3	0.0849	340.5	6.89719	23.5906	0.19363	1.00506	13.7166	23.4719
P802	802	F733-R1083	2	SRR13877981	Cheng_2022_EcoEngi	Deserts	Arid	Deserts	5	Salix gordejevii	43.02	109.45	1224	6.3	0.0849	340.5	6.81191	23.7637	0.474347	1.1364	12.8003	20.9114
P803	803	F733-R1083	2	SRR13877980	Cheng_2022_EcoEngi	Deserts	Arid	Deserts	5	Salix gordejevii	43.02	109.45	1224	6.3	0.0849	340.5	6.65795	29.9051	0.459413	1.08818	12.0845	27.4816
P804	804	F733-R1083	2	SRR21598502	Xia_2022_FE	Forests	Arid	Arid_Forests	1	Populus euphratica	40.81	81.17	1022	10.8	0.0364	50	8.62	41.8	0.58	0.59	3.91	70.8475
P805	805	F733-R1083	2	SRR21599003	Xia_2022_FE	Forests	Arid	Arid_Forests	1	Populus euphratica	40.81	81.17	1022	10.8	0.0364	50	8.72	41.8	0.58	0.59	3.91	70.8475
P806	806	F733-R1083	2	SRR21599842	Xia_2022_FE	Forests	Arid	Arid_Forests	1	Populus euphratica	40.81	81.17	1022	10.8	0.0364	50	8.69	41.8	0.58	0.59	3.91	70.8475
P807	807	F733-R1083	2	SRR21599876	Xia_2022_FE	Forests	Arid	Arid_Forests	1	Populus euphratica	40.81	81.17	1022	10.8	0.0364	50	8.4	41.8	0.58	0.59	3.91	70.8475
P808	808	F733-R1083	2	SRR21599883	Xia_2022_FE	Forests	Arid	Arid_Forests	1	Populus euphratica	40.81	81.17	1022	10.8	0.0364	50	8.48	41.8	0.58	0.59	3.91	70.8475
P809	809	F733-R1083	2	SRR21600732	Xia_2022_FE	Forests	Arid	Arid_Forests	1	Populus euphratica	40.81	81.17	1022	10.8	0.0364	50	8.58	41.8	0.58	0.59	3.91	70.8475
P810	810	F733-R1083	2	SRR21600745	Xia_2022_FE	Forests	Arid	Arid_Forests	1	Populus euphratica	40.81	81.17	1022	10.8	0.0364	50	8.75	41.8	0.58	0.59	3.91	70.8475
P811	811	F733-R1083	2	SRR21601245	Xia_2022_FE	Forests	Arid	Arid_Forests	1	Populus euphratica	40.81	81.17	1022	10.8	0.0364	50	8.27	41.8	0.58	0.59	3.91	70.8475
P812	812	F733-R1083	2	SRR21601247	Xia_2022_FE	Forests	Arid	Arid_Forests	1	Populus euphratica	40.81	81.17	1022	10.8	0.0364	50	8.38	41.8	0.58	0.59	3.91	70.8475
P813	813	F733-R1083	2	SRR21601283	Xia_2022_FE	Forests	Arid	Arid_Forests	1	Populus euphratica	40.81	81.17	1022	10.8	0.0364	50	8.72	41.8	0.58	0.59	3.91	70.8475
P814	814	F733-R1083	2	SRR21601286	Xia_2022_FE	Forests	Arid	Arid_Forests	1	Populus euphratica	40.81	81.17	1022	10.8	0.0364	50	8.66	41.8	0.58	0.59	3.91	70.8475
P815	815	F733-R1083	2	SRR21601289	Xia_2022_FE	Forests	Arid	Arid_Forests	1	Populus euphratica	40.81	81.17	1022	10.8	0.0364	50	8.74	41.8	0.58	0.59	3.91	70.8475
P816	816	F733-R1083	2	SRR21560222	Xia_2022_FE	Forests	Arid	Arid_Forests	1	Populus euphratica	40.81	81.17	1022	10.8	0.0364	50	7.92	69.44	0.89	0.69	10.84	100.638
P817	817	F733-R1083	2	SRR21598100	Xia_2022_FE	Forests	Arid	Arid_Forests	1	Populus euphratica	40.81	81.17	1022	10.8	0.0364	50	8.22	69.44	0.89	0.69	10.84	100.638
P818	818	F733-R1083	2	SRR21588688	Xia_2022_FE	Forests	Arid	Arid_Forests	1	Populus euphratica	40.81	81.17	1022	10.8	0.0364	50	8.21	69.44	0.89	0.69	10.84	100.638
P819	819	F733-R1083	2	SRR21590346	Xia_2022_FE	Forests	Arid	Arid_Forests	1	Populus euphratica	40.81	81.17	1022	10.8	0.0364	50	8.17	69.44	0.89	0.69	10.84	100.638
P820	820	F733-R1083	2	SRR21596700	Xia_2022_FE	Forests	Arid	Arid_Forests	1	Populus euphratica	40.81	81.17	1022	10.8	0.0364	50	7.89	69.44	0.89	0.69	10.84	100.638
P821	821	F733-R1083	2	SRR21598111	Xia_2022_FE	Forests	Arid	Arid_Forests	1	Populus euphratica	40.81	81.17	1022	10.8	0.0364	50	7.76	69.44	0.89	0.69	10.84	100.638
P822	822	F733-R1083	2	SRR21598118	Xia_2022_FE	Forests	Arid	Arid_Forests	1	Populus euphratica	40.81	81.17	1022	10.8	0.0364	50	7.85	69.44	0.89	0.69	10.84	100.638
P823	823	F733-R1083	2	SRR21598462	Xia_2022_FE	Forests	Arid	Arid_Forests	1	Populus euphratica	40.81	81.17	1022	10.8	0.0364	50	7.76	69.44	0.89	0.69	10.84	100.638
P824	824	F733-R1083	2	SRR21598458	Xia_2022_FE	Forests	Arid	Arid_Forests	1	Populus euphratica	40.81	81.17	1022	10.8	0.0364	50	8.16	69.44	0.89	0.69	10.84	100.638
P825	825	F733-R1083	2	SRR21598460	Xia_2022_FE	Forests	Arid	Arid_Forests	1	Populus euphratica	40.81	81.17	1022	10.8	0.0364	50	8.21	69.44	0.89	0.69	10.84	100.638
P826	826	F733-R1083	2	SRR21598459	Xia_2022_FE	Forests	Arid	Arid_Forests	1	Populus euphratica	40.81	81.17	1022	10.8	0.0364	50	8.03	69.44	0.89	0.69	10.84	100.638
P827	827	F733-R1083	2	SRR21598461	Xia_2022_FE	Forests	Arid	Arid_Forests	1	Populus euphratica	40.81	81.17	1022	10.8	0.0364	50	7.96	69.44	0.89	0.69	10.84	100.638
P828	828	F730-R1101	1	SRR21710867	Zhong_2022_Agriculture	Croplands	Temperate	Croplands	4	Brassica chinensis	30.9956	121.344	5	15	0.7856	1178	8.40882	17.6783	1.35034	0.900247	26.3518	19.6372
P829	829	F730-R1101	1	SRR21710866	Zhong_2022_Agriculture	Croplands	Temperate	Croplands	4	Brassica chinensis	30.9956	121.344	5	15	0.7856	1178	8.44039	18.3268	1.37881	1.37448	23.9659	13.3336
P830	830	F730-R1101	1	SRR21710859	Zhong_2022_Agriculture	Croplands	Temperate	Croplands	4	Brassica chinensis	30.9956	121.344	5	15	0.7856	1178	8.49795	17.3937	1.3913	0.687492	25.1412	25.3003
P831	831	F730-R1101	1	SRR21710858	Zhong_2022_Agriculture	Croplands	Temperate	Croplands	4	Brassica chinensis	30.9956	121.344	5	15	0.7856	1178	8.38819	17.7434	1.36492	1.04683	24.3	16.9496
P832	832	F730-R1101	1	SRR21710857	Zhong_2022_Agriculture	Croplands	Temperate	Croplands	4	Brassica chinensis	30.9956	121.344	5	15	0.7856	1178	7.77173	28.197	1.62817	2.05603	44.5641	13.7143
P833	833	F730-R1101	1	SRR21710856	Zhong_2022_Agriculture	Croplands	Temperate	Croplands	4	Brassica chinensis	30.9956	121.344	5	15	0.7856	1178	7.80894	26.9619	1.73631	1.86911	46.1883	14.425
P834	834	F730-R1101	1	SRR21710855	Zhong_2022_Agriculture	Croplands	Temperate	Croplands	4	Brassica chinensis	30.9956	121.344	5	15	0.7856	1178	7.76573	29.6388	1.8411	1.82168	48.2581	16.27
P835	835	F730-R1101	1	SRR21710854	Zhong_2022_Agriculture	Croplands	Temperate	Croplands	4	Brassica chinensis	30.9956	121.344	5	15	0.7856	1178	7.78293	30.0601	1.92859	2.17136	49.5037	13.8439
P836	836	F730-R1101	1	SRR21710853	Zhong_2022_Agriculture	Croplands	Temperate	Croplands	4	Brassica chinensis	30.9956	121.344	5	15	0.7856	1178	8.46408	23.2106	1.71048	1.6976	46.1157	13.6726
P837	837	F730-R1101	1	SRR21710852	Zhong_2022_Agriculture	Croplands	Temperate	Croplands	4	Brassica chinensis	30.9956	121.344	5	15	0.7856	1178	8.50196	24.1018	1.6263	1.93541	44.4247	12.4531
P838	838	F730-R1101	1	SRR21710865	Zhong_2022_Agriculture	Croplands	Temperate	Croplands	4	Brassica chinensis	30.9956	121.344	5	15	0.7856	1178	8.53283	24.8463	1.68743	1.85458	47.0222	13.3973
P839	839	F730-R1101	1	SRR21710864	Zhong_2022_Agriculture	Croplands	Temperate	Croplands	4	Brassica chinensis	30.9956	121.344	5	15	0.7856	1178	8.52532	20.4342	1.6831	1.90036	45.7763	10.7528
P840	840	F730-R1101	1	SRR21710863	Zhong_2022_Agriculture	Croplands	Temperate	Croplands	4	Brassica chinensis	30.9956	121.344	5	15	0.7856	1178	8.0007	16.0881	1.52991	1.88777	44.7266	8.52228
P841	841	F730-R1101	1	SRR21710862	Zhong_2022_Agriculture	Croplands	Temperate	Croplands	4	Brassica chinensis	30.9956	121.344	5	15	0.7856	1178	7.98399	22.2251	1.66537	1.85553	44.7423	11.9778
P842	842	F730-R1101	1	SRR21710861	Zhong_2022_Agriculture	Croplands	Temperate	Croplands	4	Brassica chinensis	30.9956	121.344	5	15	0.7856	1178	8.0787	23.8945	1.59922	1.91402	44.3236	12.4839
P843	843	F730-R1101	1	SRR21710860	Zhong_2022_Agriculture	Croplands	Temperate	Croplands	4	Brassica chinensis	30.9956	121.344	5	15	0.7856	1178	8.56072	17.1419	1.59729	1.89703	44.5263	9.03614
P844	844	F730-R1101	1	SRR18749654	Guo_2023_PlantSoil	Croplands	Temperate	Croplands	4	Maize	28.2333	117.05	41	18.7208	1.3638	1807	4.40196	12.1201	0.298705	0.408115	2.98307	29.6977
P845	845	F730-R1101	1	SRR18749653	Guo_2023_PlantSoil	Croplands	Temperate	Croplands	4	Maize	28.2333	117.05	41	18.7208	1.3638	1807	4.32982	12.3013	0.298311	0.404544	3.63731	30.4078
P846	846	F730-R1101	1	SRR18749642	Guo_2023_PlantSoil	Croplands	Temperate	Croplands	4	Maize	28.2333	117.05	41	18.7208	1.3638	1807	4.34748	11.5475	0.278376	0.376418	3.93162	30.6774
P847	847	F730-R1101	1	SRR18749631	Guo_2023_PlantSoil	Croplands	Temperate	Croplands	4	Maize	28.2333	117.05	41	18.7208	1.3638	1807	4.36488	11.748	0.261599	0.381371	3.70112	30.8046
P848	848	F730-R1101	1	SRR18749620	Guo_2023_PlantSoil	Croplands	Temperate	Croplands	4	Maize	28.2333	117.05	41	18.7208	1.3638	1807	4.34166	10.9861	0.252971	0.431598	3.3458	25.4543
P849	849	F730-R1101	1	SRR18749611	Guo_2023_PlantSoil	Croplands	Temperate	Croplands	4	Maize	28.2333	117.05	41	18.7208	1.3638	1807	4.27347	11.9613	0.120332	0.368738	4.93611	32.4385
P850	850	F730-R1101	1	SRR18749610	Guo_2023_PlantSoil	Croplands	Temperate	Croplands	4	Maize	28.2333	117.05	41	18.7208	1.3638	1807	4.34306	11.8285	0.250385	0.429633	7.32222	27.5317
P851	851	F730-R1101	1	SRR18749609	Guo_2023_PlantSoil	Croplands	Temperate	Croplands	4	Maize	28.2333	117.05	41	18.7208	1.3638	1807	4.31958	11.6883	0.167879	0.349358	4.78812	33.4565
P852	852	F730-R1101	1	SRR18749650	Guo_2023_PlantSoil	Croplands	Temperate	Croplands	4	Maize	28.2333	117.05	41	18.7208	1.3638	1807	4.39447	12.468	0.350666	0.361967	5.88532	34.4451
P853	853	F730-R1101	1	SRR18749649	Guo_2023_PlantSoil	Croplands	Temperate	Croplands	4	Maize	28.2333	117.05	41	18.7208	1.3638	1807	4.47438	11.8151	0.155688	0.630011	17.3023	18.7539
P854	854	F730-R1101	1	SRR18749648	Guo_2023_PlantSoil	Croplands	Temperate	Croplands	4	Maize	28.2333	117.05	41	18.7208	1.3638	1807	4.43345	12.1408	0.181905	0.48108	14.3695	25.2365
P855	855	F730-R1101	1	SRR18749647	Guo_2023_PlantSoil	Croplands	Temperate	Croplands	4	Maize	28.2333	117.05	41	18.7208	1.3638	1807	4.585	12.2947	0.252657	0.541079	0.871064	22.7225
P856	856	F730-R1101	1	SRR18749646	Guo_2023_PlantSoil	Croplands	Temperate	Croplands	4	Maize	28.2333	117.05	41	18.7208	1.3638	1807	4.78272	14.9368	0.367103	0.482891	30.0699	30.9321
P857	857	F730-R1101	1	SRR18749645	Guo_2023_PlantSoil	Croplands	Temperate	Croplands	4	Maize	28.2333	117.05	41	18.7208	1.3638	1807	4.8095	14.5259	0.31115	0.696394	34.8312	20.8588
P858	858	F730-R1101	1	SRR18749644	Guo_2023_PlantSoil	Croplands	Temperate	Croplands	4	Maize	28.2333	117.05	41	18.7208	1.3638	1807	4.75923	14.6615	0.347575	0.462378	35.1968	31.709
P859	859	F730-R1101	1	SRR18749643	Guo_2023_PlantSoil	Croplands	Temperate	Croplands	4	Maize	28.2333	117.05	41	18.7208	1.3638	1807	4.75342	14.2008	0.343888	0.453636	30.7722	31.3043
P860	860	F730-R1101	1	SRR18749641	Guo_2023_PlantSoil	Croplands	Temperate	Croplands	4	Maize	28.2333	117.05	41	18.7208	1.3638	1807	5.71725	21.0327	0.506776	0.789406	87.7981	26.6438
P861	861	F730-R1101	1	SRR18749640	Guo_2023_PlantSoil	Croplands	Temperate	Croplands	4	Maize	28.2333	117.05	41	18.7208	1.3638	1807	5.79047	22.0094	0.489263	0.836592	76.8234	26.3084
P862	862	F730-R1101	1	SRR18749639	Guo_2023_PlantSoil	Croplands	Temperate	Croplands	4	Maize	28.2333	117.05	41	18.7208	1.3638	1807	5.70955	19.1648	0.530407	0.827968	75.8177	23.1467
P863	863	F730-R1101	1	SRR18749638	Guo_2023_PlantSoil	Croplands	Temperate	Croplands	4	Maize	28.2333	117.05	41	18.7208	1.3638	1807	5.71162	20.3275	0.558543	0.770781	81.0144	26.3726
P864	864	F730-R1101	1	SRR18749608	Guo_2023_PlantSoil	Croplands	Temperate	Croplands	4	Maize	28.2333	117.05	41	18.7208	1.3638	1807	4.45021	11.8965	0.349191	0.598381	5.03634	19.8812
P865	865	F730-R1101	1	SRR18749607	Guo_2023_PlantSoil	Croplands	Temperate	Croplands	4	Maize	28.2333	117.05	41	18.7208	1.3638	1807	4.42725	12.0636	0.352218	0.181447	6.92454	66.4859
P866	866	F730-R1101	1	SRR18749652	Guo_2023_PlantSoil	Croplands	Temperate	Croplands	4	Maize	28.2333	117.05	41	18.7208	1.3638	1807	4.40558	10.9398	0.342889	0.897508	6.63262	12.1891
P867	867	F730-R1101	1	SRR18749651	Guo_2023_PlantSoil	Croplands	Temperate	Croplands	4	Maize	28.2333	117.05	41	18.7208	1.3638	1807	4.42213	11.0041	0.23824	1.19337	6.13686	9.22103
P868	868	F730-R1101	1	SRR18749637	Guo_2023_PlantSoil	Croplands	Temperate	Croplands	4	Maize	28.2333	117.05	41	18.7208	1.3638	1807	4.55779	15.3288	0.382658	0.288284	5.79006	53.1725
P869	869	F730-R1101	1	SRR18749636	Guo_2023_PlantSoil	Croplands	Temperate	Croplands	4	Maize	28.2333	117.05	41	18.7208	1.3638	1807	4.61977	16.472	0.348478	0.460788	5.72342	35.7475
P870	870	F730-R1101	1	SRR18749635	Guo_2023_PlantSoil	Croplands	Temperate	Croplands	4	Maize	28.2333	117.05	41	18.7208	1.3638	1807	4.59652	14.4467	0.347294	0.441271	4.83912	32.739
P871	871	F730-R1101	1	SRR18749634	Guo_2023_PlantSoil	Croplands	Temperate	Croplands	4	Maize	28.2333	117.05	41	18.7208	1.3638	1807	4.53478	14.7353	0.396514	0.331725	5.11408	44.4203
P872	872	F730-R1101	1	SRR18749624	Guo_2023_PlantSoil	Croplands	Temperate	Croplands	4	Maize	28.2333	117.05	41	18.7208	1.3638	1807	4.52005	12.573	0.306188	0.661133	3.43548	19.0174
P873	873	F730-R1101	1	SRR18749623	Guo_2023_PlantSoil	Croplands	Temperate	Croplands	4	Maize	28.2333	117.05	41	18.7208	1.3638	1807	4.49945	13.0178	0.335775	0.785481	4.14454	16.573
P874	874	F730-R1101	1	SRR18749622	Guo_2023_PlantSoil	Croplands	Temperate	Croplands	4	Maize	28.2333	117.05	41	18.7208	1.3638	1807	4.48202	12.3539	0.340123	0.557658	4.49751	22.1532
P875	875	F730-R1101	1	SRR18749621	Guo_2023_PlantSoil	Croplands	Temperate	Croplands	4	Maize	28.2333	117.05	41	18.7208	1.3638	1807	4.52109	13.3665	0.373639	0.408673	3.19109	32.707
P876	876	F730-R1101	1	SRR18749633	Guo_2023_PlantSoil	Croplands	Temperate	Croplands	4	Maize	28.2333	117.05	41	18.7208	1.3638	1807	4.63842	15.0323	0.360462	0.456462	39.1831	32.9322
P877	877	F730-R1101	1	SRR18749632	Guo_2023_PlantSoil	Croplands	Temperate	Croplands	4	Maize	28.2333	117.05	41	18.7208	1.3638	1807	4.80774	14.6306	0.401533	0.605824	31.361	24.1499
P878	878	F730-R1101	1	SRR18749630	Guo_2023_PlantSoil	Croplands	Temperate	Croplands	4	Maize	28.2333	117.05	41	18.7208	1.3638	1807	4.79283	14.1129	0.35565	0.579789	6.41867	24.3415
P879	879	F730-R1101	1	SRR18749629	Guo_2023_PlantSoil	Croplands	Temperate	Croplands	4	Maize	28.2333	117.05	41	18.7208	1.3638	1807	4.78387	17.6744	0.311379	0.460541	25.2787	38.3775
P880	880	F730-R1101	1	SRR18749619	Guo_2023_PlantSoil	Croplands	Temperate	Croplands	4	Maize	28.2333	117.05	41	18.7208	1.3638	1807	4.86888	19.0436	0.43374	0.678499	45.5253	28.0673
P881	881	F730-R1101	1	SRR18749618	Guo_2023_PlantSoil	Croplands	Temperate	Croplands	4	Maize	28.2333	117.05	41	18.7208	1.3638	1807	4.86182	15.9264	0.416091	0.731858	62.0773	21.7615
P882	882	F730-R1101	1	SRR18749617	Guo_2023_PlantSoil	Croplands	Temperate	Croplands	4	Maize	28.2333	117.05	41	18.7208	1.3638	1807	4.83054	19.5357	0.414988	0.642842	51.7493	30.3896
P883	883	F730-R1101	1	SRR18749616	Guo_2023_PlantSoil	Croplands	Temperate	Croplands	4	Maize	28.2333	117.05	41	18.7208	1.3638	1807	4.62762	18.7877	0.400418	0.716374	46.2612	26.2262
P884	884	F730-R1101	1	SRR18749615	Guo_2023_PlantSoil	Croplands	Temperate	Croplands	4	Maize	28.2333	117.05	41	18.7208	1.3638	1807	5.88514	22.9759	0.568466	1.00275	78.1928	22.9128
P885	885	F730-R1101	1	SRR18749614	Guo_2023_PlantSoil	Croplands	Temperate	Croplands	4	Maize	28.2333	117.05	41	18.7208	1.3638	1807	5.7212	24.8243	0.567781	0.907818	96.2659	27.345
P886	886	F730-R1101	1	SRR18749613	Guo_2023_PlantSoil	Croplands	Temperate	Croplands	4	Maize	28.2333	117.05	41	18.7208	1.3638	1807	5.83842	20.1969	0.538513	1.1324	85.5795	17.8354
P887	887	F730-R1101	1	SRR18749612	Guo_2023_PlantSoil	Croplands	Temperate	Croplands	4	Maize	28.2333	117.05	41	18.7208	1.3638	1807	5.96372	22.8286	0.527802	1.01949	81.8382	22.3922
P888	888	F730-R1101	1	SRR18749628	Guo_2023_PlantSoil	Croplands	Temperate	Croplands	4	Maize	28.2333	117.05	41	18.7208	1.3638	1807	4.72487	13.439	0.339631	0.537393	19.3193	25.0078
P889	889	F730-R1101	1	SRR18749627	Guo_2023_PlantSoil	Croplands	Temperate	Croplands	4	Maize	28.2333	117.05	41	18.7208	1.3638	1807	4.62371	13.7671	0.341439	0.584234	8.11518	23.5643
P890	890	F730-R1101	1	SRR18749626	Guo_2023_PlantSoil	Croplands	Temperate	Croplands	4	Maize	28.2333	117.05	41	18.7208	1.3638	1807	4.66599	14.574	0.335237	0.481984	21.1674	30.2375
P891	891	F730-R1101	1	SRR18749625	Guo_2023_PlantSoil	Croplands	Temperate	Croplands	4	Maize	28.2333	117.05	41	18.7208	1.3638	1807	4.67319	15.1993	0.339996	0.584565	20.2855	26.0011
P892	892	F730-R1101	1	SRR18218203	Wang_2023_PlantSoil	Forests	Temperate	Temperate_Forests	8	Robinia pseudoacacia	35.4	108.16	1289	9.15417	0.4793	582	8.37072	7.27054	0.922553	0.5642	8.00923	12.8865
P893	893	F730-R1101	1	SRR18218202	Wang_2023_PlantSoil	Forests	Temperate	Temperate_Forests	8	Robinia pseudoacacia	35.4	108.16	1289	9.15417	0.4793	582	8.36955	8.33286	0.978306	0.56584	7.91673	14.7265
P894	894	F730-R1101	1	SRR18218201	Wang_2023_PlantSoil	Forests	Temperate	Temperate_Forests	8	Robinia pseudoacacia	35.4	108.16	1289	9.15417	0.4793	582	8.35666	7.75531	0.992529	0.551487	7.77113	14.0625
P895	895	F730-R1101	1	SRR18218200	Wang_2023_PlantSoil	Forests	Temperate	Temperate_Forests	8	Robinia pseudoacacia	35.4	108.16	1289	9.15417	0.4793	582	8.24769	10.2063	1.17885	0.593605	6.02226	17.1938
P896	896	F730-R1101	1	SRR18218199	Wang_2023_PlantSoil	Forests	Temperate	Temperate_Forests	8	Robinia pseudoacacia	35.4	108.16	1289	9.15417	0.4793	582	8.3734	9.86612	1.23237	0.592867	6.05326	16.6414
P897	897	F730-R1101	1	SRR18218198	Wang_2023_PlantSoil	Forests	Temperate	Temperate_Forests	8	Robinia pseudoacacia	35.4	108.16	1289	9.15417	0.4793	582	8.22818	9.56062	1.09803	0.587262	6.11903	16.28
P898	898	F730-R1101	1	SRR18218214	Wang_2023_PlantSoil	Forests	Temperate	Temperate_Forests	8	Robinia pseudoacacia	35.4	108.16	1289	9.15417	0.4793	582	7.5687	10.993	1.37366	0.684646	3.87744	16.0565
P899	899	F730-R1101	1	SRR18218213	Wang_2023_PlantSoil	Forests	Temperate	Temperate_Forests	8	Robinia pseudoacacia	35.4	108.16	1289	9.15417	0.4793	582	7.53261	10.5088	1.45324	0.698471	3.95688	15.0454
P900	900	F730-R1101	1	SRR18218204	Wang_2023_PlantSoil	Forests	Temperate	Temperate_Forests	8	Robinia pseudoacacia	35.4	108.16	1289	9.15417	0.4793	582	7.55013	12.308	1.38938	0.682359	4.23296	18.0374
P901	901	F730-R1101	1	SRR18218197	Wang_2023_PlantSoil	Croplands	Arid	Croplands	4	Not_recorded	34.33	108.72	381	13.75	0.4602	601	7.28105	13.3804	1.64688	0.666082	4.41085	20.0882
P902	902	F730-R1101	1	SRR18218212	Wang_2023_PlantSoil	Croplands	Arid	Croplands	4	Not_recorded	34.33	108.72	381	13.75	0.4602	601	7.33855	13.7881	1.55167	0.654625	3.8578	21.0625
P903	903	F730-R1101	1	SRR18218211	Wang_2023_PlantSoil	Croplands	Arid	Croplands	4	Not_recorded	34.33	108.72	381	13.75	0.4602	601	7.27791	13.6245	1.48484	0.641777	2.60325	21.2293
P904	904	F730-R1101	1	SRR18218210	Wang_2023_PlantSoil	Croplands	Arid	Croplands	4	Not_recorded	34.33	108.72	381	13.75	0.4602	601	7.0413	15.0316	1.61086	0.80461	35.966	18.6818
P905	905	F730-R1101	1	SRR18218209	Wang_2023_PlantSoil	Croplands	Arid	Croplands	4	Not_recorded	34.33	108.72	381	13.75	0.4602	601	7.09978	13.7083	1.59474	0.854993	36.2325	16.0332
P906	906	F730-R1101	1	SRR18218208	Wang_2023_PlantSoil	Croplands	Arid	Croplands	4	Not_recorded	34.33	108.72	381	13.75	0.4602	601	6.95862	14.8212	1.59794	0.801624	29.6321	18.489
P907	907	F730-R1101	1	SRR18218207	Wang_2023_PlantSoil	Croplands	Arid	Croplands	4	Not_recorded	34.33	108.72	381	13.75	0.4602	601	6.86057	14.9387	1.79664	0.894332	52.0668	16.7037
P908	908	F730-R1101	1	SRR18218206	Wang_2023_PlantSoil	Croplands	Arid	Croplands	4	Not_recorded	34.33	108.72	381	13.75	0.4602	601	7.00246	15.0368	1.77664	0.904476	55.2168	16.6249
P909	909	F730-R1101	1	SRR18218205	Wang_2023_PlantSoil	Croplands	Arid	Croplands	4	Not_recorded	34.33	108.72	381	13.75	0.4602	601	7.1808	15.0026	1.80192	0.957573	52.9406	15.6674
P910	910	F733-R1083	2	SRR19137782	Chenshuo_2023_STOTEN	Croplands	Arid	Croplands	4	cucumber_tomato	38.1333	114.383	94	11.5	0.3401	540	7.15249	6.46996	1.09452	1.30429	44.8109	4.96052
P911	911	F733-R1083	2	SRR19137781	Chenshuo_2023_STOTEN	Croplands	Arid	Croplands	4	cucumber_tomato	38.1333	114.383	94	11.5	0.3401	540	6.82091	6.86772	1.096	0.991508	38.8189	6.92654
P912	912	F733-R1083	2	SRR19137778	Chenshuo_2023_STOTEN	Croplands	Arid	Croplands	4	cucumber_tomato	38.1333	114.383	94	11.5	0.3401	540	7.59812	6.78238	1.15988	1.31047	35.0697	5.17553
P913	913	F733-R1083	2	SRR19137777	Chenshuo_2023_STOTEN	Croplands	Arid	Croplands	4	cucumber_tomato	38.1333	114.383	94	11.5	0.3401	540	7.18526	11.8731	1.00749	0.809132	101.92	14.6738
P914	914	F733-R1083	2	SRR19137776	Chenshuo_2023_STOTEN	Croplands	Arid	Croplands	4	cucumber_tomato	38.1333	114.383	94	11.5	0.3401	540	6.74831	12.4931	1.24682	0.854899	90.1389	14.6135
P915	915	F733-R1083	2	SRR19137775	Chenshuo_2023_STOTEN	Croplands	Arid	Croplands	4	cucumber_tomato	38.1333	114.383	94	11.5	0.3401	540	7.09959	12.6237	1.27703	1.02449	76.5912	12.3219
P916	916	F733-R1083	2	SRR19137774	Chenshuo_2023_STOTEN	Croplands	Arid	Croplands	4	cucumber_tomato	38.1333	114.383	94	11.5	0.3401	540	6.81502	13.6748	1.07691	1.00438	70.4473	13.6151
P917	917	F733-R1083	2	SRR19137773	Chenshuo_2023_STOTEN	Croplands	Arid	Croplands	4	cucumber_tomato	38.1333	114.383	94	11.5	0.3401	540	7.2088	12.5229	1.33777	0.96091	64.8767	13.0323
P918	918	F733-R1083	2	SRR19137772	Chenshuo_2023_STOTEN	Croplands	Arid	Croplands	4	cucumber_tomato	38.1333	114.383	94	11.5	0.3401	540	7.23375	12.3111	1.09074	1.05725	56.3998	11.6444
P919	919	F733-R1083	2	SRR19137771	Chenshuo_2023_STOTEN	Croplands	Arid	Croplands	4	cucumber_tomato	38.1333	114.383	94	11.5	0.3401	540	7.30958	13.7973	1.23708	0.743921	48.3224	18.5467
P920	920	F733-R1083	2	SRR19137780	Chenshuo_2023_STOTEN	Croplands	Arid	Croplands	4	cucumber_tomato	38.1333	114.383	94	11.5	0.3401	540	7.20061	12.5293	0.797782	0.972642	56.5494	12.8817
P921	921	F733-R1083	2	SRR19137779	Chenshuo_2023_STOTEN	Croplands	Arid	Croplands	4	cucumber_tomato	38.1333	114.383	94	11.5	0.3401	540	6.75543	14.8683	0.987748	1.21347	45.4357	12.2527
P922	922	F733-R1083	2	SRR8846851	Zhao_2022_FrontierMicro	Desert_biocrusts	Arid	Deserts	5	Biocrusts	42.004	119.383	499	4	0.284	7.4375	5.72839	1.5791	0.0150384	0.382399	6.75848	4.12947
P923	923	F733-R1083	2	SRR8846850	Zhao_2022_FrontierMicro	Desert_biocrusts	Arid	Deserts	5	Biocrusts	42.004	119.383	499	4	0.284	7.4375	5.57991	1.05309	0.0119029	0.404167	6.86716	2.6056
P924	924	F733-R1083	2	SRR8846853	Zhao_2022_FrontierMicro	Desert_biocrusts	Arid	Deserts	5	Biocrusts	42.004	119.383	499	4	0.284	7.4375	5.40105	2.03022	0.0433585	0.40982	6.19559	4.95393
P925	925	F733-R1083	2	SRR8846849	Zhao_2022_FrontierMicro	Desert_biocrusts	Arid	Deserts	5	Biocrusts	42.004	119.383	499	4	0.284	7.4375	7.57195	8.67462	0.199874	0.511996	13.4658	16.9428
P926	926	F733-R1083	2	SRR8846848	Zhao_2022_FrontierMicro	Desert_biocrusts	Arid	Deserts	5	Biocrusts	42.004	119.383	499	4	0.284	7.4375	7.50757	8.43044	0.216722	0.514884	13.9478	16.3735
P927	927	F733-R1083	2	SRR8846845	Zhao_2022_FrontierMicro	Desert_biocrusts	Arid	Deserts	5	Biocrusts	42.004	119.383	499	4	0.284	7.4375	7.55236	8.51063	0.173019	0.525678	13.1153	16.1898
P928	928	F733-R1083	2	SRR8846844	Zhao_2022_FrontierMicro	Desert_biocrusts	Arid	Deserts	5	Biocrusts	42.004	119.383	499	4	0.284	7.4375	7.07615	10.0249	0.211796	0.557625	13.5856	17.9779
P929	929	F733-R1083	2	SRR8846855	Zhao_2022_FrontierMicro	Desert_biocrusts	Arid	Deserts	5	Biocrusts	42.004	119.383	499	4	0.284	7.4375	6.99947	9.78983	0.218797	0.530031	6.51326	18.4703
P930	930	F733-R1083	2	SRR8846854	Zhao_2022_FrontierMicro	Desert_biocrusts	Arid	Deserts	5	Biocrusts	42.004	119.383	499	4	0.284	7.4375	6.67211	10.2697	0.234418	0.519493	14.3191	19.7686
P931	931	F733-R1083	2	SRR8846852	Zhao_2022_FrontierMicro	Desert_biocrusts	Arid	Deserts	5	Biocrusts	42.004	119.383	499	4	0.284	7.4375	6.8447	6.15467	0.199409	0.439566	7.1368	14.0017
P932	932	F733-R1083	2	SRR8846847	Zhao_2022_FrontierMicro	Desert_biocrusts	Arid	Deserts	5	Biocrusts	42.004	119.383	499	4	0.284	7.4375	6.84205	7.00761	0.188621	0.52421	9.67809	13.368
P933	933	F733-R1083	2	SRR8846846	Zhao_2022_FrontierMicro	Desert_biocrusts	Arid	Deserts	5	Biocrusts	42.004	119.383	499	4	0.284	7.4375	6.84059	6.73462	0.17909	0.463286	9.05611	14.5366
P934	934	F733-R1083	2	31	LiJiabao_2021_Geoderma	Forests	Polar	Polar	6	Abies fabri	28.4043	100.408	4688	12	1.1615	286.6	3.8	33.74	1.4	0.858677	11.5036	39.293
P935	935	F733-R1083	2	32	LiJiabao_2021_Geoderma	Forests	Polar	Polar	6	Abies fabri	28.4043	100.408	4688	13.1	1.1615	286.6	3.5	41.31	1.6	0.65987	11.8815	62.6032
P936	936	F733-R1083	2	33	LiJiabao_2021_Geoderma	Forests	Polar	Polar	6	Abies fabri	28.4043	100.408	4688	12.7	1.1615	286.6	3.5	40.72	1.75	0.766463	18.0059	53.1272
P937	937	F733-R1083	2	34	LiJiabao_2021_Geoderma	Forests	Polar	Polar	6	Abies fabri	28.4043	100.408	4688	12	1.1615	286.6	3.7	34.86	1.48	0.943505	15.77	36.9473
P938	938	F733-R1083	2	35	LiJiabao_2021_Geoderma	Forests	Polar	Polar	6	Abies fabri	28.4043	100.408	4688	13.1	1.1615	286.6	3.6	41.22	1.6	0.602721	9.03948	68.3898
P939	939	F733-R1083	2	36	LiJiabao_2021_Geoderma	Forests	Polar	Polar	6	Abies fabri	28.4043	100.408	4688	12.7	1.1615	286.6	3.8	23.85	1.55	1.05285	15.7997	22.6529
P940	940	F733-R1083	2	37	LiJiabao_2021_Geoderma	Forests	Polar	Polar	6	Abies fabri	28.4043	100.408	4688	11.2	1.1615	297.9	4.4	21.26	1.25	1.26952	21.76	16.7465
P941	941	F733-R1083	2	38	LiJiabao_2021_Geoderma	Forests	Polar	Polar	6	Abies fabri	28.4043	100.408	4688	12.4	1.1615	297.9	4.2	16.39	0.87	1.29242	24.23	12.6816
P942	942	F733-R1083	2	39	LiJiabao_2021_Geoderma	Forests	Polar	Polar	6	Abies fabri	28.4043	100.408	4688	12.2	1.1615	297.9	4.1	26.38	1.5	1.3913	23.22	18.9607
P943	943	F733-R1083	2	40	LiJiabao_2021_Geoderma	Forests	Polar	Polar	6	Abies fabri	28.4043	100.408	4688	11.2	1.1615	297.9	4.1	29.78	1.67	1.23893	14.74	24.037
P944	944	F733-R1083	2	41	LiJiabao_2021_Geoderma	Forests	Polar	Polar	6	Abies fabri	28.4043	100.408	4688	12.4	1.1615	297.9	4.6	12.15	0.76	1.64729	15.57	7.37575
P945	945	F733-R1083	2	42	LiJiabao_2021_Geoderma	Forests	Polar	Polar	6	Abies fabri	28.4043	100.408	4688	12.2	1.1615	297.9	3.9	35.51	1.88	1.15586	15.01	30.7217
P946	946	F733-R1083	2	43	LiJiabao_2021_Geoderma	Forests	Polar	Polar	6	Abies fabri	28.4043	100.408	4688	9.8	1.1615	309.2	4.7	9.75	0.45	1.32421	8.20256	7.36286
P947	947	F733-R1083	2	44	LiJiabao_2021_Geoderma	Forests	Polar	Polar	6	Abies fabri	28.4043	100.408	4688	9.8	1.1615	309.2	4.4	10.73	0.56	1.21711	7.16668	8.81595
P948	948	F733-R1083	2	45	LiJiabao_2021_Geoderma	Forests	Polar	Polar	6	Abies fabri	28.4043	100.408	4688	9.8	1.1615	309.2	4.4	11.36	0.61	1.27901	17.3359	8.88188
P949	949	F733-R1083	2	46	LiJiabao_2021_Geoderma	Forests	Polar	Polar	6	Abies fabri	28.4043	100.408	4688	9.8	1.1615	309.2	4.7	9.11	0.45	1.01976	5.60719	8.93349
P950	950	F733-R1083	2	47	LiJiabao_2021_Geoderma	Forests	Polar	Polar	6	Abies fabri	28.4043	100.408	4688	9.8	1.1615	309.2	4.7	7.87	0.43	1.32027	8.73945	5.96092
P951	951	F733-R1083	2	48	LiJiabao_2021_Geoderma	Forests	Polar	Polar	6	Abies fabri	28.4043	100.408	4688	9.8	1.1615	309.2	4.8	5.77	0.28	1.57327	11.1711	3.66752
P952	952	F733-R1083	2	49	LiJiabao_2021_Geoderma	Forests	Polar	Polar	6	Abies fabri	28.4043	100.408	4688	7.4	1.1615	326.2	3.7	34.14	1.58	1.14471	19.19	29.8241
P953	953	F733-R1083	2	50	LiJiabao_2021_Geoderma	Forests	Polar	Polar	6	Abies fabri	28.4043	100.408	4688	7.1	1.1615	326.2	3.9	33.36	1.4	0.95228	18.79	35.0317
P954	954	F733-R1083	2	51	LiJiabao_2021_Geoderma	Forests	Polar	Polar	6	Abies fabri	28.4043	100.408	4688	6.9	1.1615	326.2	3.8	20.5	0.91	0.825621	18.07	24.8298
P955	955	F733-R1083	2	52	LiJiabao_2021_Geoderma	Forests	Polar	Polar	6	Abies fabri	28.4043	100.408	4688	7.4	1.1615	326.2	3.9	23.48	1.23	0.984363	13.97	23.853
P956	956	F733-R1083	2	53	LiJiabao_2021_Geoderma	Forests	Polar	Polar	6	Abies fabri	28.4043	100.408	4688	7.1	1.1615	326.2	3.9	34.09	1.47	0.967815	12.86	35.2237
P957	957	F733-R1083	2	54	LiJiabao_2021_Geoderma	Forests	Polar	Polar	6	Abies fabri	28.4043	100.408	4688	6.9	1.1615	326.2	3.8	16.34	0.72	0.698215	7.11	23.4025
P958	958	F733-R1083	2	61	LiJiabao_2021_Geoderma	Forests	Polar	Polar	6	Abies fabri	28.4043	100.408	4688	7.4	1.1615	154.3	4.1	37.28	1.73	0.83832	79.8998	44.4699
P959	959	F733-R1083	2	62	LiJiabao_2021_Geoderma	Forests	Polar	Polar	6	Abies fabri	28.4043	100.408	4688	7.1	1.1615	154.3	3.6	38.26	1.66	0.83966	44.4568	45.5661
P960	960	F733-R1083	2	63	LiJiabao_2021_Geoderma	Forests	Polar	Polar	6	Abies fabri	28.4043	100.408	4688	7.5	1.1615	154.3	3.9	29.7	1.67	0.83673	46.792	35.4953
P961	961	F733-R1083	2	64	LiJiabao_2021_Geoderma	Forests	Polar	Polar	6	Abies fabri	28.4043	100.408	4688	7.4	1.1615	154.3	3.7	25.21	1.33	0.61874	45.0616	40.7441
P962	962	F733-R1083	2	65	LiJiabao_2021_Geoderma	Forests	Polar	Polar	6	Abies fabri	28.4043	100.408	4688	7.1	1.1615	154.3	3.7	27.39	1.22	0.64774	47.4163	42.2855
P963	963	F733-R1083	2	66	LiJiabao_2021_Geoderma	Forests	Polar	Polar	6	Abies fabri	28.4043	100.408	4688	7.5	1.1615	154.3	3.8	27.95	1.62	0.70628	56.8807	39.5735
P964	964	F733-R1083	2	67	LiJiabao_2021_Geoderma	Forests	Polar	Polar	6	Abies fabri	28.4043	100.408	4688	6.1	1.1615	160.4	4.2	22.4	1.32	1.25849	66.3439	17.7991
P965	965	F733-R1083	2	68	LiJiabao_2021_Geoderma	Forests	Polar	Polar	6	Abies fabri	28.4043	100.408	4688	5.9	1.1615	160.4	4.1	34.19	1.68	1.32094	88.8144	25.8831
P966	966	F733-R1083	2	69	LiJiabao_2021_Geoderma	Forests	Polar	Polar	6	Abies fabri	28.4043	100.408	4688	6	1.1615	160.4	4.2	23.45	1.41	1.31233	64.8434	17.869
P967	967	F733-R1083	2	70	LiJiabao_2021_Geoderma	Forests	Polar	Polar	6	Abies fabri	28.4043	100.408	4688	6.1	1.1615	160.4	4.2	17.71	1.07	1.15815	66.0249	15.2916
P968	968	F733-R1083	2	71	LiJiabao_2021_Geoderma	Forests	Polar	Polar	6	Abies fabri	28.4043	100.408	4688	5.9	1.1615	160.4	4.2	34.25	1.74	1.08609	77.7932	31.5351
P969	969	F733-R1083	2	72	LiJiabao_2021_Geoderma	Forests	Polar	Polar	6	Abies fabri	28.4043	100.408	4688	6	1.1615	160.4	4.4	11.2	0.57	1.1706	70.5872	9.56774
P970	970	F733-R1083	2	73	LiJiabao_2021_Geoderma	Forests	Polar	Polar	6	Abies fabri	28.4043	100.408	4688	6.2	1.1615	166.5	4.4	13.65	0.72	0.97717	47.152	13.9689
P971	971	F733-R1083	2	74	LiJiabao_2021_Geoderma	Forests	Polar	Polar	6	Abies fabri	28.4043	100.408	4688	4.7	1.1615	166.5	4.5	9.51	0.48	1.19124	62.9005	7.98328
P972	972	F733-R1083	2	75	LiJiabao_2021_Geoderma	Forests	Polar	Polar	6	Abies fabri	28.4043	100.408	4688	4.9	1.1615	166.5	4.9	5.39	0.25	1.07855	38.145	4.99745
P973	973	F733-R1083	2	76	LiJiabao_2021_Geoderma	Forests	Polar	Polar	6	Abies fabri	28.4043	100.408	4688	6.2	1.1615	166.5	4.6	12.05	0.62	1.02824	44.3494	11.7191
P974	974	F733-R1083	2	77	LiJiabao_2021_Geoderma	Forests	Polar	Polar	6	Abies fabri	28.4043	100.408	4688	4.7	1.1615	166.5	4.7	7.39	0.38	1.22209	40.6252	6.04702
P975	975	F733-R1083	2	78	LiJiabao_2021_Geoderma	Forests	Polar	Polar	6	Abies fabri	28.4043	100.408	4688	4.9	1.1615	166.5	5	5.16	0.28	1.28755	37.9749	4.00761
P976	976	F733-R1083	2	79	LiJiabao_2021_Geoderma	Forests	Polar	Polar	6	Abies fabri	28.4043	100.408	4688	1.7	1.1615	175.6	3.7	29.64	1.29	1.03559	66.1817	28.6214
P977	977	F733-R1083	2	80	LiJiabao_2021_Geoderma	Forests	Polar	Polar	6	Abies fabri	28.4043	100.408	4688	1.5	1.1615	175.6	4.3	13.56	0.52	1.11863	140.736	12.122
P978	978	F733-R1083	2	81	LiJiabao_2021_Geoderma	Forests	Polar	Polar	6	Abies fabri	28.4043	100.408	4688	1.6	1.1615	175.6	4	12.58	0.46	0.75436	28.4125	16.6764
P979	979	F733-R1083	2	82	LiJiabao_2021_Geoderma	Forests	Polar	Polar	6	Abies fabri	28.4043	100.408	4688	1.7	1.1615	175.6	3.9	13.57	0.55	0.85763	28.1663	15.8227
P980	980	F733-R1083	2	83	LiJiabao_2021_Geoderma	Forests	Polar	Polar	6	Abies fabri	28.4043	100.408	4688	1.5	1.1615	175.6	4.3	11.96	0.48	1	190.913	11.96
P981	981	F733-R1083	2	84	LiJiabao_2021_Geoderma	Forests	Polar	Polar	6	Abies fabri	28.4043	100.408	4688	1.6	1.1615	175.6	4	12.97	0.47	0.66961	33.2056	19.3695
P982	982	F730-R1101	1	SRR8949821	Xie_2020_ASE	Croplands	Temperate	Croplands	4	Maize-wheat	35.4558	116.526	37	13.5	0.462	700	6.83245	19.0813	0.743985	0.627893	36.6377	30.3895
P983	983	F730-R1101	1	SRR8949822	Xie_2020_ASE	Croplands	Temperate	Croplands	4	Maize-wheat	35.4558	116.526	37	13.5	0.462	700	7.71667	17.5846	1.21754	0.615993	50.8763	28.5467
P984	984	F730-R1101	1	SRR8949823	Xie_2020_ASE	Croplands	Temperate	Croplands	4	Maize-wheat	35.4558	116.526	37	13.5	0.462	700	7.07769	13.9407	1.16949	0.639756	45.738	21.7907
P985	985	F730-R1101	1	SRR8949824	Xie_2020_ASE	Croplands	Temperate	Croplands	4	Maize-wheat	35.4558	116.526	37	13.5	0.462	700	7.81922	11.2205	1.04968	0.778467	37.3647	14.4136
P986	986	F730-R1101	1	SRR8949817	Xie_2020_ASE	Croplands	Temperate	Croplands	4	Maize-wheat	35.4558	116.526	37	13.5	0.462	700	8.57875	12.5983	1.24105	0.788773	30.2877	15.972
P987	987	F730-R1101	1	SRR8949818	Xie_2020_ASE	Croplands	Temperate	Croplands	4	Maize-wheat	35.4558	116.526	37	13.5	0.462	700	6.83055	14.8009	1.79371	0.49704	31.4383	29.7781
P988	988	F730-R1101	1	SRR8949819	Xie_2020_ASE	Croplands	Temperate	Croplands	4	Maize-wheat	35.4558	116.526	37	13.5	0.462	700	6.82653	21.2401	1.27833	0.806526	45.023	26.3353
P989	989	F730-R1101	1	SRR8949820	Xie_2020_ASE	Croplands	Temperate	Croplands	4	Maize-wheat	35.4558	116.526	37	13.5	0.462	700	6.19666	19.8732	1.56026	1.01072	43.4732	19.6624
P990	990	F730-R1101	1	SRR8949825	Xie_2020_ASE	Croplands	Temperate	Croplands	4	Maize-wheat	35.4558	116.526	37	13.5	0.462	700	6.63295	10.812	1.2929	0.642992	38.3726	16.8152
P991	991	F730-R1101	1	SRR8949807	Xie_2020_ASE	Croplands	Temperate	Croplands	4	Maize-wheat	35.4558	116.526	37	13.5	0.462	700	6.50275	17.9363	1.06052	0.723076	48.8199	24.8056
P992	992	F730-R1101	1	SRR8949808	Xie_2020_ASE	Croplands	Temperate	Croplands	4	Maize-wheat	35.4558	116.526	37	13.5	0.462	700	6.3578	18.7485	1.17041	0.575775	51.983	32.5621
P993	993	F730-R1101	1	SRR8949809	Xie_2020_ASE	Croplands	Temperate	Croplands	4	Soybean-wheat	35.4558	116.526	37	13.5	0.462	700	6.79577	15.7649	1.61725	0.595299	38.3076	26.4823
P994	994	F730-R1101	1	SRR8949810	Xie_2020_ASE	Croplands	Temperate	Croplands	4	Soybean-wheat	35.4558	116.526	37	13.5	0.462	700	6.83027	16.6924	1.65967	0.572955	32.4081	29.1339
P995	995	F730-R1101	1	SRR8949811	Xie_2020_ASE	Croplands	Temperate	Croplands	4	Soybean-wheat	35.4558	116.526	37	13.5	0.462	700	7.52232	12.936	1.48116	0.593609	26.7456	21.7921
P996	996	F730-R1101	1	SRR8949812	Xie_2020_ASE	Croplands	Temperate	Croplands	4	Soybean-wheat	35.4558	116.526	37	13.5	0.462	700	7.50875	16.1577	0.872972	0.666882	45.7082	24.2288
P997	997	F730-R1101	1	SRR8949813	Xie_2020_ASE	Croplands	Temperate	Croplands	4	Soybean-wheat	35.4558	116.526	37	13.5	0.462	700	6.56775	10.3892	1.25681	0.645131	37.7821	16.104
P998	998	F730-R1101	1	SRR8949814	Xie_2020_ASE	Croplands	Temperate	Croplands	4	Soybean-wheat	35.4558	116.526	37	13.5	0.462	700	6.37383	12.0415	1.13769	0.519564	24.9434	23.1762
P999	999	F730-R1101	1	SRR8949815	Xie_2020_ASE	Croplands	Temperate	Croplands	4	Soybean-wheat	35.4558	116.526	37	13.5	0.462	700	6.40554	16.153	1.02585	0.555133	23.7933	29.0975
P1000	1000	F730-R1101	1	SRR8949816	Xie_2020_ASE	Croplands	Temperate	Croplands	4	Soybean-wheat	35.4558	116.526	37	13.5	0.462	700	6.53021	17.3489	1.12463	0.650028	29.8612	26.6895
P1001	1001	F730-R1101	1	SRR8949828	Xie_2020_ASE	Croplands	Temperate	Croplands	4	Soybean-wheat	35.4558	116.526	37	13.5	0.462	700	6.43722	16.6247	0.968345	0.643718	31.7101	25.8261
P1002	1002	F730-R1101	1	SRR8949827	Xie_2020_ASE	Croplands	Temperate	Croplands	4	Soybean-wheat	35.4558	116.526	37	13.5	0.462	700	5.8553	11.6185	1.28511	0.503971	28.7821	23.0539
P1003	1003	F730-R1101	1	SRR8949830	Xie_2020_ASE	Croplands	Temperate	Croplands	4	Soybean-wheat	35.4558	116.526	37	13.5	0.462	700	5.40219	18.3507	1.17651	0.492591	42.3033	37.2534
P1004	1004	F730-R1101	1	SRR8949829	Xie_2020_ASE	Croplands	Temperate	Croplands	4	Soybean-wheat	35.4558	116.526	37	13.5	0.462	700	6.18767	16.9309	1.34389	0.583556	29.3402	29.0134
P1005	1005	F730-R1101	1	phoD	Bergkemper_2016_JMM	Forests	Temperate	Temperate_Forests	8	Fagus sylvatica	50.352	9.92903	782	5.8	1.5088	1031	5.3	48.18	2.06	1.57	9.2324	30.6879
P1006	1006	F730-R1101	1	SRR14118039	Chen_2022_EnvRes	Aquatic	Temperate	Sediments	7	Not_recorded	27.66	100.3	1927	15.1083	0.6085	805	8.17993	10.2171	0.529687	0.638746	5.65619	15.9956
P1007	1007	F730-R1101	1	SRR14118038	Chen_2022_EnvRes	Aquatic	Arid	Sediments	7	Not_recorded	27.7	100.29	2165	14.3208	0.5881	781	8.28374	12.0846	0.0701701	0.604925	4.19267	19.977
P1008	1008	F730-R1101	1	SRR14118027	Chen_2022_EnvRes	Aquatic	Arid	Sediments	7	Not_recorded	27.61	100.45	1704	17.1417	0.5653	809	9.20415	18.4928	0.628679	1.03386	20.6542	17.8871
P1009	1009	F730-R1101	1	SRR14118016	Chen_2022_EnvRes	Aquatic	Arid	Sediments	7	Not_recorded	27.61	100.45	1704	17.1417	0.5653	809	9.07958	19.7122	0.575313	1.05463	22.8021	18.6911
P1010	1010	F730-R1101	1	SRR14118008	Chen_2022_EnvRes	Aquatic	Arid	Sediments	7	Not_recorded	27.61	100.45	1704	17.1417	0.5653	809	9.10035	21.404	0.486608	1.03226	20.7797	20.7351
P1011	1011	F730-R1101	1	SRR14118007	Chen_2022_EnvRes	Aquatic	Temperate	Sediments	7	Not_recorded	27.35	100.51	1659	16.475	0.5903	804	9.04498	15.3409	0.420308	0.782456	11.3597	19.6061
P1012	1012	F730-R1101	1	SRR14118005	Chen_2022_EnvRes	Aquatic	Temperate	Sediments	7	Not_recorded	27.35	100.51	1659	16.475	0.5903	804	9.03114	22.0829	0.435788	1.12405	19.5049	19.6458
P1013	1013	F730-R1101	1	SRR14118004	Chen_2022_EnvRes	Aquatic	Temperate	Sediments	7	Not_recorded	26.53	100.42	1412	18.6	0.5831	844	8.54671	14.6244	0.264182	0.869858	5.27177	16.8124
P1014	1014	F730-R1101	1	SRR14118003	Chen_2022_EnvRes	Aquatic	Temperate	Sediments	7	Not_recorded	26.53	100.42	1412	18.6	0.5831	844	8.52595	13.606	0.353906	0.959157	5.77654	14.1853
P1015	1015	F730-R1101	1	SRR14118001	Chen_2022_EnvRes	Aquatic	Temperate	Sediments	7	Not_recorded	26.53	100.42	1412	18.6	0.5831	844	8.31834	14.76	0.381811	0.78216	5.14915	18.8708
P1016	1016	F730-R1101	1	SRR14118002	Chen_2022_EnvRes	Aquatic	Temperate	Sediments	7	Not_recorded	26.5	100.42	1347	18.8333	0.5775	845	8.54671	14.1138	0.175782	0.734632	6.45526	19.2121
P1017	1017	F730-R1101	1	SRR14118006	Chen_2022_EnvRes	Aquatic	Temperate	Sediments	7	Not_recorded	27.66	100.3	1927	15.1083	0.6085	805	8.17993	13.0636	0.633568	0.518117	10.0587	25.2136
P1018	1018	F730-R1101	1	SRR14118000	Chen_2022_EnvRes	Aquatic	Temperate	Sediments	7	Not_recorded	26.5	100.42	1347	18.8333	0.5775	845	8.44291	10.3872	0.233221	0.669066	5.57178	15.5249
P1019	1019	F730-R1101	1	SRR14117999	Chen_2022_EnvRes	Aquatic	Temperate	Sediments	7	Not_recorded	26.5	100.42	1347	18.8333	0.5775	845	8.52595	9.71387	0.183216	0.703837	4.80694	13.8013
P1020	1020	F730-R1101	1	SRR14117998	Chen_2022_EnvRes	Aquatic	Temperate	Sediments	7	Not_recorded	26.18	100.77	1344	19.1375	0.5282	787	8.73356	18.3495	0.570323	1.0071	13.4735	18.2201
P1021	1021	F730-R1101	1	SRR14117997	Chen_2022_EnvRes	Aquatic	Temperate	Sediments	7	Not_recorded	26.18	100.77	1344	19.1375	0.5282	787	8.66436	21.1877	0.367247	0.985206	9.94239	21.5058
P1022	1022	F730-R1101	1	SRR14117996	Chen_2022_EnvRes	Aquatic	Temperate	Sediments	7	Not_recorded	26.18	100.77	1344	19.1375	0.5282	787	8.85813	15.6407	0.241165	0.963726	7.1682	16.2294
P1023	1023	F730-R1101	1	SRR14117994	Chen_2022_EnvRes	Aquatic	Temperate	Sediments	7	Not_recorded	26.17	100.83	1520	17.6542	0.5489	767	9.10035	13.455	0.470822	0.709177	8.45948	18.9726
P1024	1024	F730-R1101	1	SRR14117993	Chen_2022_EnvRes	Aquatic	Temperate	Sediments	7	Not_recorded	26.17	100.83	1520	17.6542	0.5489	767	8.97578	11.4165	0.195437	0.734573	7.33417	15.5416
P1025	1025	F730-R1101	1	SRR14117992	Chen_2022_EnvRes	Aquatic	Temperate	Sediments	7	Not_recorded	26.17	100.83	1520	17.6542	0.5489	767	8.71972	13.1138	0.188818	0.721163	7.95985	18.1843
P1026	1026	F730-R1101	1	SRR14117990	Chen_2022_EnvRes	Aquatic	Arid	Sediments	7	Not_recorded	26.5	101.44	1364	19.8625	0.4789	750	8.82353	22.0675	0.570221	1.00277	19.1479	22.0065
P1027	1027	F730-R1101	1	SRR14117991	Chen_2022_EnvRes	Aquatic	Arid	Sediments	7	Not_recorded	26.5	101.44	1364	19.8625	0.4789	750	8.96194	21.2006	0.696914	0.968295	17.1249	21.8948
P1028	1028	F730-R1101	1	SRR14117995	Chen_2022_EnvRes	Aquatic	Temperate	Sediments	7	Not_recorded	27.66	100.3	1927	15.1083	0.6085	805	8.3737	8.86119	0.597006	0.465902	15.4782	19.0194
P1029	1029	F730-R1101	1	SRR14117989	Chen_2022_EnvRes	Aquatic	Arid	Sediments	7	Not_recorded	26.5	101.44	1364	19.8625	0.4789	750	6.12457	7.26399	0.436399	0.855736	10.9907	8.48859
P1030	1030	F730-R1101	1	SRR14117988	Chen_2022_EnvRes	Aquatic	Arid	Sediments	7	Not_recorded	26.56	101.48	1092	20.7958	0.4818	756	9.13495	15.3394	0.436501	0.816456	11.8662	18.7877
P1031	1031	F730-R1101	1	SRR14117987	Chen_2022_EnvRes	Aquatic	Arid	Sediments	7	Not_recorded	26.56	101.48	1092	20.7958	0.4818	756	9.18339	15.4867	0.301864	0.729055	8.96481	21.2421
P1032	1032	F730-R1101	1	SRR14117986	Chen_2022_EnvRes	Aquatic	Arid	Sediments	7	Not_recorded	26.56	101.48	1092	20.7958	0.4818	756	8.96194	14.7995	0.354211	0.686748	10.3508	21.5501
P1033	1033	F730-R1101	1	SRR14117985	Chen_2022_EnvRes	Aquatic	Temperate	Sediments	7	Not_recorded	28.27	103.56	1316	13.4667	0.892	884	8.11073	6.1469	0.346064	0.357259	15.6168	17.2057
P1034	1034	F730-R1101	1	SRR14117983	Chen_2022_EnvRes	Aquatic	Temperate	Sediments	7	Not_recorded	28.27	103.56	1316	13.4667	0.892	884	7.93772	7.16537	0.420919	0.262441	11.828	27.3028
P1035	1035	F730-R1101	1	SRR14117982	Chen_2022_EnvRes	Aquatic	Temperate	Sediments	7	Not_recorded	28.27	103.56	1316	13.4667	0.892	884	7.83391	25.2616	0.301355	0.266653	11.828	94.7355
P1036	1036	F730-R1101	1	SRR14117981	Chen_2022_EnvRes	Aquatic	Arid	Sediments	7	Not_recorded	28.24	103.72	738	16.6833	0.9358	1018	8.14533	9.7225	0.725125	0.551582	3.41984	17.6266
P1037	1037	F730-R1101	1	SRR14117979	Chen_2022_EnvRes	Aquatic	Arid	Sediments	7	Not_recorded	28.24	103.72	738	16.6833	0.9358	1018	7.97232	9.7225	0.636521	0.478956	4.93184	20.2994
P1038	1038	F730-R1101	1	SRR14117980	Chen_2022_EnvRes	Aquatic	Arid	Sediments	7	Not_recorded	28.24	103.72	738	16.6833	0.9358	1018	8.00692	10.0544	0.628068	0.409949	8.08532	24.526
P1039	1039	F730-R1101	1	SRR14117984	Chen_2022_EnvRes	Aquatic	Arid	Sediments	7	Not_recorded	27.7	100.29	2165	14.3208	0.5881	781	8.73356	11.7456	0.30716	0.668948	2.66583	17.5583
P1040	1040	F730-R1101	1	SRR14117978	Chen_2022_EnvRes	Aquatic	Temperate	Sediments	7	Not_recorded	28.62	104.06	645	16.4042	1.125	1129	8.3737	9.53976	0.458499	0.38752	10.1854	24.6175
P1041	1041	F730-R1101	1	SRR14117977	Chen_2022_EnvRes	Aquatic	Temperate	Sediments	7	Not_recorded	28.62	104.06	645	16.4042	1.125	1129	8.2699	8.18323	0.589571	0.435522	13.9702	18.7895
P1042	1042	F730-R1101	1	SRR14117976	Chen_2022_EnvRes	Aquatic	Temperate	Sediments	7	Not_recorded	28.62	104.06	645	16.4042	1.125	1129	7.99308	7.84426	0.458397	0.279529	15.2284	28.0624
P1043	1043	F730-R1101	1	SRR14117975	Chen_2022_EnvRes	Aquatic	Temperate	Sediments	7	Not_recorded	28.62	104.3	295	18.075	1.1409	1175	8.28374	11.4174	0.433955	0.61252	1.66657	18.64
P1044	1044	F730-R1101	1	SRR14117974	Chen_2022_EnvRes	Aquatic	Temperate	Sediments	7	Not_recorded	28.62	104.3	295	18.075	1.1409	1175	8.3737	12.626	0.49394	0.600593	3.42212	21.0225
P1045	1045	F730-R1101	1	SRR14117972	Chen_2022_EnvRes	Aquatic	Temperate	Sediments	7	Not_recorded	28.62	104.3	295	18.075	1.1409	1175	8.31834	10.7401	0.650168	0.460858	3.55501	23.3044
P1046	1046	F730-R1101	1	SRR14117973	Chen_2022_EnvRes	Aquatic	Arid	Sediments	7	Not_recorded	27.7	100.29	2165	14.3208	0.5881	781	8.47751	12.76	0.206131	0.543928	1.54109	23.4591
P1047	1047	F730-R1101	1	SRR14117971	Chen_2022_EnvRes	Aquatic	Temperate	Sediments	7	Not_recorded	26.1747	99.88	2780	11.2125	0.7491	859	8.16609	10.3003	1.4971	0.652571	14.8047	15.7842
P1048	1048	F730-R1101	1	SRR14117966	Chen_2022_EnvRes	Aquatic	Temperate	Sediments	7	Not_recorded	25.838	99.177	1358	17.5875	0.9218	1239	8.11073	3.03077	1.02098	0.435285	4.52689	6.96273
P1049	1049	F730-R1101	1	SRR14117965	Chen_2022_EnvRes	Aquatic	Temperate	Sediments	7	Not_recorded	25.3218	99.203	1875	15.4792	0.7813	1025	8.47751	11.6707	1.6023	0.813133	3.62459	14.3528
P1050	1050	F730-R1101	1	SRR14117964	Chen_2022_EnvRes	Aquatic	Temperate	Sediments	7	Not_recorded	25.3218	99.203	1875	15.4792	0.7813	1025	8.52595	12.344	1.63173	0.825119	3.12496	14.9603
P1051	1051	F730-R1101	1	SRR14117963	Chen_2022_EnvRes	Aquatic	Temperate	Sediments	7	Not_recorded	25.3218	99.203	1875	15.4792	0.7813	1025	8.62976	11.8047	1.99542	0.772547	4.01586	15.2803
P1052	1052	F730-R1101	1	SRR14118037	Chen_2022_EnvRes	Aquatic	Temperate	Sediments	7	Not_recorded	25.3841	99.1554	2694	11.85	0.9529	1071	8.78893	9.67628	1.15745	0.505538	6.66971	19.1406
P1053	1053	F730-R1101	1	SRR14118036	Chen_2022_EnvRes	Aquatic	Temperate	Sediments	7	Not_recorded	25.3841	99.1554	2694	11.85	0.9529	1071	8.76817	9.12621	1.10357	0.508623	6.90698	17.943
P1054	1054	F730-R1101	1	SRR14118035	Chen_2022_EnvRes	Aquatic	Temperate	Sediments	7	Not_recorded	25.3841	99.1554	2694	11.85	0.9529	1071	8.69896	4.05448	1.14177	0.543869	7.16592	7.45489
P1055	1055	F730-R1101	1	SRR14118034	Chen_2022_EnvRes	Aquatic	Temperate	Sediments	7	Not_recorded	25.395	99.289	1340	17.8333	0.8001	1113	6.36678	7.04673	1.04501	0.747033	9.23002	9.43296
P1056	1056	F730-R1101	1	SRR14118033	Chen_2022_EnvRes	Aquatic	Temperate	Sediments	7	Not_recorded	25.395	99.289	1340	17.8333	0.8001	1113	6.31142	7.26337	0.820858	0.742998	10.9901	9.77575
P1057	1057	F730-R1101	1	SRR14118032	Chen_2022_EnvRes	Aquatic	Temperate	Sediments	7	Not_recorded	25.395	99.289	1340	17.8333	0.8001	1113	6.55363	7.04766	0.658112	0.816278	13.7586	8.6339
P1058	1058	F730-R1101	1	SRR14117970	Chen_2022_EnvRes	Aquatic	Temperate	Sediments	7	Not_recorded	26.1747	99.88	2780	11.2125	0.7491	859	8.06228	11.324	1.5193	0.660997	17.0781	17.1317
P1059	1059	F730-R1101	1	SRR14118031	Chen_2022_EnvRes	Aquatic	Temperate	Sediments	7	Not_recorded	24.959	99.739	1181	18.8542	0.7733	1067	7.5917	5.05385	0.745493	0.456824	2.49929	11.063
P1060	1060	F730-R1101	1	SRR14118030	Chen_2022_EnvRes	Aquatic	Temperate	Sediments	7	Not_recorded	24.959	99.739	1181	18.8542	0.7733	1067	7.28028	6.28188	0.806803	0.461808	3.13466	13.6028
P1061	1061	F730-R1101	1	SRR14118029	Chen_2022_EnvRes	Aquatic	Temperate	Sediments	7	Not_recorded	24.959	99.739	1181	18.8542	0.7733	1067	7.12803	6.76415	0.834912	0.447686	2.49872	15.1091
P1062	1062	F730-R1101	1	SRR14118028	Chen_2022_EnvRes	Aquatic	Temperate	Sediments	7	Not_recorded	24.2142	100.164	1853	17.0542	0.7934	1065	7.95848	10.4467	1.32009	0.61246	10.9114	17.0569
P1063	1063	F730-R1101	1	SRR14118026	Chen_2022_EnvRes	Aquatic	Temperate	Sediments	7	Not_recorded	24.2142	100.164	1853	17.0542	0.7934	1065	7.75087	9.63622	1.23943	0.573536	13.2881	16.8014
P1064	1064	F730-R1101	1	SRR14118025	Chen_2022_EnvRes	Aquatic	Temperate	Sediments	7	Not_recorded	24.2142	100.164	1853	17.0542	0.7934	1065	7.40484	8.61928	1.42204	0.587896	12.0356	14.6612
P1065	1065	F730-R1101	1	SRR14118024	Chen_2022_EnvRes	Aquatic	Temperate	Sediments	7	Not_recorded	24.2232	100.161	1879	16.9625	0.7923	1064	8.07612	2.68162	1.02149	0.362124	5.28033	7.40526
P1066	1066	F730-R1101	1	SRR14118023	Chen_2022_EnvRes	Aquatic	Temperate	Sediments	7	Not_recorded	24.2232	100.161	1879	16.9625	0.7923	1064	8.04152	2.8958	1.01365	0.361531	4.01129	8.00981
P1067	1067	F730-R1101	1	SRR14118022	Chen_2022_EnvRes	Aquatic	Temperate	Sediments	7	Not_recorded	24.2232	100.161	1879	16.9625	0.7923	1064	8.20069	0.85823	0.99226	0.357615	4.52404	2.39987
P1068	1068	F730-R1101	1	SRR14118021	Chen_2022_EnvRes	Aquatic	Temperate	Sediments	7	Not_recorded	22.118	100.165	1408	18.8125	1.0498	1532	7.09343	9.63529	0.919544	0.678738	9.5209	14.1959
P1069	1069	F730-R1101	1	SRR14117968	Chen_2022_EnvRes	Aquatic	Temperate	Sediments	7	Not_recorded	26.1747	99.88	2780	11.2125	0.7491	859	8.13149	9.42574	1.16325	0.690309	19.6013	13.6544
P1070	1070	F730-R1101	1	SRR14118020	Chen_2022_EnvRes	Aquatic	Temperate	Sediments	7	Not_recorded	22.118	100.165	1408	18.8125	1.0498	1532	6.78201	6.71546	0.911804	0.743236	10.7723	9.03544
P1071	1071	F730-R1101	1	SRR14118019	Chen_2022_EnvRes	Aquatic	Temperate	Sediments	7	Not_recorded	22.118	100.165	1408	18.8125	1.0498	1532	6.55363	7.2532	0.968632	0.68307	6.11476	10.6185
P1072	1072	F730-R1101	1	SRR14118018	Chen_2022_EnvRes	Aquatic	Temperate	Sediments	7	Not_recorded	22.242	100.134	1023	20.4458	1.0567	1569	8.02768	2.20798	0.89724	0.365269	4.63868	6.0448
P1073	1073	F730-R1101	1	SRR14118017	Chen_2022_EnvRes	Aquatic	Temperate	Sediments	7	Not_recorded	22.242	100.134	1023	20.4458	1.0567	1569	7.85467	0.866551	0.807211	0.396776	4.00958	2.18398
P1074	1074	F730-R1101	1	SRR14118015	Chen_2022_EnvRes	Aquatic	Temperate	Sediments	7	Not_recorded	22.242	100.134	1023	20.4458	1.0567	1569	7.75087	0.848985	0.852123	0.45356	3.88353	1.87183
P1075	1075	F730-R1101	1	SRR14118014	Chen_2022_EnvRes	Aquatic	Temperate	Sediments	7	Not_recorded	22.031	100.453	1203	20.0042	1.0538	1566	8.44291	12.8149	1.47744	0.815566	15.8262	15.7129
P1076	1076	F730-R1101	1	SRR14118013	Chen_2022_EnvRes	Aquatic	Temperate	Sediments	7	Not_recorded	22.031	100.453	1203	20.0042	1.0538	1566	8.2699	11.9937	1.60067	0.77409	15.9402	15.4939
P1077	1077	F730-R1101	1	SRR14118012	Chen_2022_EnvRes	Aquatic	Temperate	Sediments	7	Not_recorded	22.031	100.453	1203	20.0042	1.0538	1566	8.3045	9.75023	1.48488	0.764893	15.5701	12.7472
P1078	1078	F730-R1101	1	SRR14118011	Chen_2022_EnvRes	Aquatic	Temperate	Sediments	7	Not_recorded	22.0333	100.453	1203	20.0042	1.0538	1566	8.59516	3.70626	1.06009	0.512955	5.52729	7.22531
P1079	1079	F730-R1101	1	SRR14118010	Chen_2022_EnvRes	Aquatic	Temperate	Sediments	7	Not_recorded	22.0333	100.453	1203	20.0042	1.0538	1566	8.44291	3.91673	1.03839	0.491891	5.51645	7.96261
P1080	1080	F730-R1101	1	SRR14117969	Chen_2022_EnvRes	Aquatic	Temperate	Sediments	7	Not_recorded	25.838	99.177	1358	17.5875	0.9218	1239	8.16609	2.00675	1.04583	0.5339	6.41191	3.75866
P1081	1081	F730-R1101	1	SRR14118009	Chen_2022_EnvRes	Aquatic	Temperate	Sediments	7	Not_recorded	22.0333	100.453	1203	20.0042	1.0538	1566	8.2699	3.6964	0.837458	0.535206	5.52672	6.9065
P1082	1082	F730-R1101	1	SRR14117967	Chen_2022_EnvRes	Aquatic	Temperate	Sediments	7	Not_recorded	25.838	99.177	1358	17.5875	0.9218	1239	8.16609	2.2203	0.984011	0.495154	5.78338	4.48407
P1083	1083	F730-R1101	1	SRR18821631	Yang_2023_Ecoind	Aquatic	Polar	Sediments	7	Not_recorded	34.08	95.75	4110	15.59	0.384	82.75	7.67858	16.9431	0.804587	0.805952	14.2445	21.0225
P1084	1084	F730-R1101	1	SRR18821543	Yang_2023_Ecoind	Aquatic	Arid	Sediments	7	Not_recorded	29.79	99.02	2676	15.13	0.4921	84.5	7.44276	16.4229	0.698947	0.691501	13.6542	23.7496
P1085	1085	F730-R1101	1	SRR18821488	Yang_2023_Ecoind	Aquatic	Polar	Sediments	7	Not_recorded	33.35	96.97	3669	15.63	0.3784	83.58	8.64213	16.7034	0.677721	0.807529	12.8578	20.6846
P1086	1086	F730-R1101	1	SRR18821533	Yang_2023_Ecoind	Aquatic	Arid	Sediments	7	Not_recorded	28.23	99.31	2049	15.76	0.6774	84	7.55775	18.7365	0.837834	0.670614	10.5364	27.9393
P1087	1087	F730-R1101	1	SRR18821522	Yang_2023_Ecoind	Aquatic	Temperate	Sediments	7	Not_recorded	27	100.07	1911	15.57	0.6699	84.92	8.05258	20.1774	0.897446	0.823555	14.0777	24.5004
P1088	1088	F730-R1101	1	SRR18821630	Yang_2023_Ecoind	Aquatic	Arid	Sediments	7	Not_recorded	26.22	100.58	1237	15.28	0.527	86	8.71222	17.3138	0.899311	0.751335	14.1733	23.044
P1089	1089	F730-R1101	1	SRR18821619	Yang_2023_Ecoind	Aquatic	Arid	Sediments	7	Not_recorded	26.55	101.86	1064	22.29	0.4877	6.25	7.54375	18.2936	0.852848	0.715475	12.5198	25.5684
P1090	1090	F730-R1101	1	SRR18821608	Yang_2023_Ecoind	Aquatic	Arid	Sediments	7	Not_recorded	26.9	102.94	882	17.12	0.595	124.33	7.60574	17.411	0.860199	0.724014	13.8236	24.0479
P1091	1091	F730-R1101	1	SRR18821565	Yang_2023_Ecoind	Aquatic	Temperate	Sediments	7	Not_recorded	28.63	103.89	405	16.86	1.124	125.67	8.21446	17.4671	0.881188	0.800408	12.0916	21.8227
P1092	1092	F730-R1101	1	SRR18821554	Yang_2023_Ecoind	Aquatic	Temperate	Sediments	7	Not_recorded	28.78	104.73	259	17.36	1.1108	117.08	8.71027	17.5157	0.98897	0.815493	14.8985	21.4787
P1093	1093	F730-R1101	1	SRR18821542	Yang_2023_Ecoind	Aquatic	Temperate	Sediments	7	Not_recorded	28.86	105.62	271	17.46	1.0739	116.5	8.556	19.9352	0.648452	0.76097	12.4124	26.1971
P1094	1094	F730-R1101	1	SRR18821595	Yang_2023_Ecoind	Aquatic	Temperate	Sediments	7	Not_recorded	29.21	106.21	189	16.28	1.031	97.33	8.76687	17.3098	0.861218	0.739138	15.4222	23.4189
P1095	1095	F730-R1101	1	SRR18821584	Yang_2023_Ecoind	Aquatic	Temperate	Sediments	7	Not_recorded	29.56	106.72	174	15.8	1.0498	87.5	8.00586	17.6952	0.976645	0.753113	12.9917	23.496
P1096	1096	F730-R1101	1	SRR18821573	Yang_2023_Ecoind	Aquatic	Temperate	Sediments	7	Not_recorded	29.83	107.48	140	16.51	1.1043	115.25	7.08682	19.7445	0.845895	0.710698	12.773	27.7819
P1097	1097	F730-R1101	1	SRR18821506	Yang_2023_Ecoind	Aquatic	Temperate	Sediments	7	Not_recorded	30.85	108.44	195	16.32	1.1172	107.5	7.61398	17.3518	0.725086	0.719551	10.4759	24.1148
P1098	1098	F730-R1101	1	SRR18821495	Yang_2023_Ecoind	Aquatic	Temperate	Sediments	7	Not_recorded	30.65	111.32	50	16.98	0.8597	101.67	7.99919	16.6045	0.733137	0.843534	12.9044	19.6845
P1099	1099	F730-R1101	1	SRR18821492	Yang_2023_Ecoind	Aquatic	Temperate	Sediments	7	Not_recorded	30.21	112.26	31	17.27	0.91	106.67	8.87867	17.1655	0.738668	0.73436	14.9576	23.3748
P1100	1100	F730-R1101	1	SRR18821491	Yang_2023_Ecoind	Aquatic	Temperate	Sediments	7	Not_recorded	29.73	112.9	31	16.98	1.0107	89.5	8.63881	18.9395	0.919486	0.75086	11.8243	25.2237
P1101	1101	F730-R1101	1	SRR18821490	Yang_2023_Ecoind	Aquatic	Temperate	Sediments	7	Not_recorded	29.83	113.51	23	16.56	1.0366	91.83	8.33267	16.2588	0.743981	0.719309	11.0219	22.6033
P1102	1102	F730-R1101	1	SRR18821489	Yang_2023_Ecoind	Aquatic	Temperate	Sediments	7	Not_recorded	30.21	114.08	22	17.04	1.0195	111.33	8.09765	17.7672	0.865577	0.658078	17.3657	26.9987
P1103	1103	F730-R1101	1	SRR18821487	Yang_2023_Ecoind	Aquatic	Temperate	Sediments	7	Not_recorded	30.66	114.53	23	17.22	0.9989	117.33	8.37087	17.5478	0.995571	0.747095	13.7446	23.4881
P1104	1104	F730-R1101	1	SRR18821486	Yang_2023_Ecoind	Aquatic	Temperate	Sediments	7	Not_recorded	30.4	114.96	19	17.1	1.0353	105.67	7.66476	16.4159	1.0464	0.759434	12.7343	21.616
P1105	1105	F730-R1101	1	SRR18821485	Yang_2023_Ecoind	Aquatic	Temperate	Sediments	7	Not_recorded	30.22	115.13	24	16.96	1.0653	104	8.10808	17.7723	0.992746	0.788588	11.5815	22.5368
P1106	1106	F730-R1101	1	SRR18821484	Yang_2023_Ecoind	Aquatic	Temperate	Sediments	7	Not_recorded	29.83	115.59	20	18.2	1.0456	94.75	8.50196	17.3449	0.763123	0.796231	12.3201	21.7838
P1107	1107	F730-R1101	1	SRR18821483	Yang_2023_Ecoind	Aquatic	Temperate	Sediments	7	Not_recorded	29.75	116.03	26	16.5	1.0053	91.58	7.44504	17.3933	0.987402	0.639179	15.8144	27.212
P1108	1108	F730-R1101	1	SRR18821482	Yang_2023_Ecoind	Aquatic	Temperate	Sediments	7	Not_recorded	29.96	116.59	7	19.04	1.0915	69.42	8.07989	18.1634	0.776177	0.738137	15.3819	24.607
P1109	1109	F730-R1101	1	SRR18821481	Yang_2023_Ecoind	Aquatic	Temperate	Sediments	7	Not_recorded	30.49	117.02	15	17.77	1.1455	98.67	8.22876	20.0203	1.04236	0.823618	12.6029	24.3078
P1110	1110	F730-R1101	1	SRR18821480	Yang_2023_Ecoind	Aquatic	Temperate	Sediments	7	Not_recorded	30.78	117.69	7	18.49	1.0795	100.25	7.83278	18.2421	1.14164	0.749972	12.9845	24.3237
P1111	1111	F730-R1101	1	SRR18821535	Yang_2023_Ecoind	Aquatic	Temperate	Sediments	7	Not_recorded	31.08	117.92	9	18.13	1.0141	105.33	8.23307	16.2088	0.927224	0.881404	14.786	18.3897
P1112	1112	F730-R1101	1	SRR18821534	Yang_2023_Ecoind	Aquatic	Temperate	Sediments	7	Not_recorded	31.37	118.33	6	18.63	0.909	91.92	7.81066	18.4395	0.97523	0.763989	13.7396	24.1358
P1113	1113	F730-R1101	1	SRR18821532	Yang_2023_Ecoind	Aquatic	Temperate	Sediments	7	Not_recorded	31.89	118.57	5	18.54	0.811	94.08	7.86989	18.8457	0.667085	0.749012	12.0769	25.1607
P1114	1114	F730-R1101	1	SRR18821531	Yang_2023_Ecoind	Aquatic	Temperate	Sediments	7	Not_recorded	32.19	118.98	2	9.62	0.7848	54.92	7.76348	19.1521	0.752248	0.661811	14.8472	28.9389
P1115	1115	F730-R1101	1	SRR18821530	Yang_2023_Ecoind	Aquatic	Temperate	Sediments	7	Not_recorded	32.2	119.57	1	2.66	0.7843	38.25	7.9255	16.8345	0.781052	0.73662	12.9157	22.8536
P1116	1116	F730-R1101	1	SRR18821529	Yang_2023_Ecoind	Aquatic	Temperate	Sediments	7	Not_recorded	32	119.96	0	-1.92	0.7826	34.75	8.10865	19.717	1.18136	0.725008	13.277	27.1955
P1117	1117	F730-R1101	1	SRR18821528	Yang_2023_Ecoind	Aquatic	Temperate	Sediments	7	Not_recorded	31.88	120.93	2	20.5	0.8228	68.5	8.2196	17.3176	0.771324	0.782525	13.9535	22.1305
P1118	1118	F730-R1101	1	SRR18821527	Yang_2023_Ecoind	Aquatic	Temperate	Sediments	7	Not_recorded	31.73	121.67	2	21.15	0.8617	64	7.38609	19.1451	0.839348	0.737709	12.469	25.9521
P1119	1119	F730-R1101	1	SRR18821526	Yang_2023_Ecoind	Aquatic	Temperate	Sediments	7	Not_recorded	31.47	121.76	3000	13.31	0.7826	74.75	7.70545	17.6463	0.681789	0.665731	14.3759	26.5067
P1120	1120	F730-R1101	1	SRR18821525	Yang_2023_Ecoind	Aquatic	Temperate	Sediments	7	Not_recorded	31.43	121.59	4000	14.68	0.7326	72.75	7.93219	18.8058	0.875501	0.770721	14.7475	24.4003
P1121	1121	F730-R1101	1	SRR18821524	Yang_2023_Ecoind	Aquatic	Polar	Sediments	7	Not_recorded	34.08	95.75	4110	15.59	0.384	82.75	8.53146	16.6763	0.976562	0.727444	13.2858	22.9245
P1122	1122	F730-R1101	1	SRR18821523	Yang_2023_Ecoind	Aquatic	Arid	Sediments	7	Not_recorded	29.79	99.02	2676	15.13	0.4921	84.5	8.17808	18.6906	0.772697	0.772846	14.3232	24.1841
P1123	1123	F730-R1101	1	SRR18821521	Yang_2023_Ecoind	Aquatic	Polar	Sediments	7	Not_recorded	33.35	96.97	3669	15.63	0.3784	83.58	8.18395	18.0148	0.953173	0.742558	13.9034	24.2605
P1124	1124	F730-R1101	1	SRR18821520	Yang_2023_Ecoind	Aquatic	Arid	Sediments	7	Not_recorded	28.23	99.31	2049	15.76	0.6774	84	8.56402	18.6913	0.471756	0.71158	10.0457	26.2673
P1125	1125	F730-R1101	1	SRR18821519	Yang_2023_Ecoind	Aquatic	Temperate	Sediments	7	Not_recorded	27	100.07	1911	15.57	0.6699	84.92	8.5034	21.9667	0.78671	0.751414	9.53729	29.2338
P1126	1126	F730-R1101	1	SRR18821518	Yang_2023_Ecoind	Aquatic	Arid	Sediments	7	Not_recorded	26.22	100.58	1237	15.28	0.527	86	7.96547	18.007	0.824329	0.690514	13.2992	26.0776
P1127	1127	F730-R1101	1	SRR18821517	Yang_2023_Ecoind	Aquatic	Arid	Sediments	7	Not_recorded	26.55	101.86	1064	22.29	0.4877	6.25	8.00892	15.9202	1.03933	0.813482	9.39395	19.5705
P1128	1128	F730-R1101	1	SRR18821516	Yang_2023_Ecoind	Aquatic	Arid	Sediments	7	Not_recorded	26.9	102.94	882	17.12	0.595	124.33	8.53265	16.4038	0.814942	0.681117	15.074	24.0836
P1129	1129	F730-R1101	1	SRR18821515	Yang_2023_Ecoind	Aquatic	Temperate	Sediments	7	Not_recorded	28.63	103.89	405	16.86	1.124	125.67	8.2043	18.4973	0.922099	0.707551	14.245	26.1428
P1130	1130	F730-R1101	1	SRR18821514	Yang_2023_Ecoind	Aquatic	Temperate	Sediments	7	Not_recorded	28.78	104.73	259	17.36	1.1108	117.08	8.60797	15.2664	0.910549	0.769452	14.2922	19.8406
P1131	1131	F730-R1101	1	SRR18821513	Yang_2023_Ecoind	Aquatic	Temperate	Sediments	7	Not_recorded	28.86	105.62	271	17.46	1.0739	116.5	7.8082	16.465	0.742653	0.763475	12.9479	21.5659
P1132	1132	F730-R1101	1	SRR18821512	Yang_2023_Ecoind	Aquatic	Temperate	Sediments	7	Not_recorded	29.21	106.21	189	16.28	1.031	97.33	8.33792	17.93	0.846163	0.729573	14.9113	24.576
P1133	1133	F730-R1101	1	SRR18821629	Yang_2023_Ecoind	Aquatic	Temperate	Sediments	7	Not_recorded	29.56	106.72	174	15.8	1.0498	87.5	8.02903	20.5005	0.758756	0.811671	8.80725	25.2571
P1134	1134	F730-R1101	1	SRR18821628	Yang_2023_Ecoind	Aquatic	Temperate	Sediments	7	Not_recorded	29.83	107.48	140	16.51	1.1043	115.25	9.07174	16.3568	0.68618	0.669513	15.1196	24.4309
P1135	1135	F730-R1101	1	SRR18821627	Yang_2023_Ecoind	Aquatic	Temperate	Sediments	7	Not_recorded	30.85	108.44	195	16.32	1.1172	107.5	7.78874	18.4882	0.769832	0.681336	12.3306	27.1352
P1136	1136	F730-R1101	1	SRR18821626	Yang_2023_Ecoind	Aquatic	Temperate	Sediments	7	Not_recorded	30.65	111.32	50	16.98	0.8597	101.67	7.75804	19.7546	0.774451	0.757832	10.5666	26.0672
P1137	1137	F730-R1101	1	SRR18821625	Yang_2023_Ecoind	Aquatic	Temperate	Sediments	7	Not_recorded	30.21	112.26	31	17.27	0.91	106.67	7.53393	19.5017	0.98996	0.76662	17.619	25.4386
P1138	1138	F730-R1101	1	SRR18821624	Yang_2023_Ecoind	Aquatic	Temperate	Sediments	7	Not_recorded	29.73	112.9	31	16.98	1.0107	89.5	8.2487	19.5863	0.913218	0.831307	12.0589	23.5608
P1139	1139	F730-R1101	1	SRR18821623	Yang_2023_Ecoind	Aquatic	Temperate	Sediments	7	Not_recorded	29.83	113.51	23	16.56	1.0366	91.83	7.3879	19.6972	0.677561	0.754054	13.5861	26.1218
P1140	1140	F730-R1101	1	SRR18821622	Yang_2023_Ecoind	Aquatic	Temperate	Sediments	7	Not_recorded	30.21	114.08	22	17.04	1.0195	111.33	7.68191	17.913	0.841844	0.75618	9.90809	23.6888
P1141	1141	F730-R1101	1	SRR18821621	Yang_2023_Ecoind	Aquatic	Temperate	Sediments	7	Not_recorded	30.66	114.53	23	17.22	0.9989	117.33	7.3146	17.5025	0.864797	0.816679	16.3097	21.4313
P1142	1142	F730-R1101	1	SRR18821620	Yang_2023_Ecoind	Aquatic	Temperate	Sediments	7	Not_recorded	30.4	114.96	19	17.1	1.0353	105.67	8.21965	17.5876	0.766854	0.643283	17.4221	27.3403
P1143	1143	F730-R1101	1	SRR18821618	Yang_2023_Ecoind	Aquatic	Temperate	Sediments	7	Not_recorded	30.22	115.13	24	16.96	1.0653	104	8.05592	17.807	0.923568	0.769358	11.3145	23.1453
P1144	1144	F730-R1101	1	SRR18821617	Yang_2023_Ecoind	Aquatic	Temperate	Sediments	7	Not_recorded	29.83	115.59	20	18.2	1.0456	94.75	7.39998	18.3592	0.807343	0.707927	12.6918	25.9337
P1145	1145	F730-R1101	1	SRR18821616	Yang_2023_Ecoind	Aquatic	Temperate	Sediments	7	Not_recorded	29.75	116.03	26	16.5	1.0053	91.58	8.46668	19.2338	0.926755	0.794386	14.9424	24.2121
P1146	1146	F730-R1101	1	SRR18821615	Yang_2023_Ecoind	Aquatic	Temperate	Sediments	7	Not_recorded	29.96	116.59	7	19.04	1.0915	69.42	8.07059	17.1208	0.674893	0.76571	14.7642	22.3594
P1147	1147	F730-R1101	1	SRR18821614	Yang_2023_Ecoind	Aquatic	Temperate	Sediments	7	Not_recorded	30.49	117.02	15	17.77	1.1455	98.67	8.30444	17.2117	0.950214	0.697657	12.5617	24.6707
P1148	1148	F730-R1101	1	SRR18821613	Yang_2023_Ecoind	Aquatic	Temperate	Sediments	7	Not_recorded	30.78	117.69	7	18.49	1.0795	100.25	8.94858	20.1723	0.731267	0.713165	13.037	28.2856
P1149	1149	F730-R1101	1	SRR18821612	Yang_2023_Ecoind	Aquatic	Temperate	Sediments	7	Not_recorded	31.08	117.92	9	18.13	1.0141	105.33	8.08947	18.1468	1.04395	0.840102	12.2068	21.6007
P1150	1150	F730-R1101	1	SRR18821611	Yang_2023_Ecoind	Aquatic	Temperate	Sediments	7	Not_recorded	31.37	118.33	6	18.63	0.909	91.92	8.20362	17.3168	0.868982	0.738947	11.3527	23.4344
P1151	1151	F730-R1101	1	SRR18821610	Yang_2023_Ecoind	Aquatic	Temperate	Sediments	7	Not_recorded	31.89	118.57	5	18.54	0.811	94.08	8.40849	19.0967	0.811855	0.737602	13.0385	25.8902
P1152	1152	F730-R1101	1	SRR18821609	Yang_2023_Ecoind	Aquatic	Temperate	Sediments	7	Not_recorded	32.19	118.98	2	9.62	0.7848	54.92	8.23416	19.0507	1.04692	0.755018	10.4183	25.2321
P1153	1153	F730-R1101	1	SRR18821607	Yang_2023_Ecoind	Aquatic	Temperate	Sediments	7	Not_recorded	32.2	119.57	1	2.66	0.7843	38.25	6.68433	18.8375	0.6817	0.704419	12.0915	26.7419
P1154	1154	F730-R1101	1	SRR18821606	Yang_2023_Ecoind	Aquatic	Temperate	Sediments	7	Not_recorded	32	119.96	0	-1.92	0.7826	34.75	8.14419	17.8083	0.912629	0.786199	12.311	22.6512
P1155	1155	F730-R1101	1	SRR18821605	Yang_2023_Ecoind	Aquatic	Temperate	Sediments	7	Not_recorded	31.88	120.93	2	20.5	0.8228	68.5	8.57744	19.3378	0.79335	0.790994	14.1747	24.4474
P1156	1156	F730-R1101	1	SRR18821604	Yang_2023_Ecoind	Aquatic	Temperate	Sediments	7	Not_recorded	31.73	121.67	2	21.15	0.8617	64	7.81467	19.6927	0.911072	0.773877	13.5663	25.4468
P1157	1157	F730-R1101	1	SRR18821603	Yang_2023_Ecoind	Aquatic	Temperate	Sediments	7	Not_recorded	31.47	121.76	2	13.31	0.7826	74.75	8.26242	18.4475	0.919612	0.728737	15.9241	25.3144
P1158	1158	F730-R1101	1	SRR18821602	Yang_2023_Ecoind	Aquatic	Temperate	Sediments	7	Not_recorded	31.43	121.59	2	14.68	0.8228	72.75	7.61727	18.4084	1.04896	0.744331	14.4454	24.7315
P1159	1159	F730-R1101	1	SRR18821601	Yang_2023_Ecoind	Aquatic	Polar	Sediments	7	Not_recorded	34.08	95.75	4110	15.59	0.384	82.75	8.34294	14.3729	0.533545	0.579376	6.46233	24.8075
P1160	1160	F730-R1101	1	SRR18821600	Yang_2023_Ecoind	Aquatic	Arid	Sediments	7	Not_recorded	29.79	99.02	2676	15.13	0.4921	84.5	7.91293	16.625	0.44571	0.645107	6.91983	25.771
P1161	1161	F730-R1101	1	SRR18821567	Yang_2023_Ecoind	Aquatic	Polar	Sediments	7	Not_recorded	33.35	96.97	3669	15.63	0.3784	83.58	8.4767	15.4758	0.478939	0.571178	5.62076	27.0945
P1162	1162	F730-R1101	1	SRR18821566	Yang_2023_Ecoind	Aquatic	Arid	Sediments	7	Not_recorded	28.23	99.31	2049	15.76	0.6774	84	7.59559	15.9643	0.477965	0.593957	7.98914	26.8778
P1163	1163	F730-R1101	1	SRR18821564	Yang_2023_Ecoind	Aquatic	Temperate	Sediments	7	Not_recorded	27	100.07	1911	15.57	0.6699	84.92	7.93926	16.2746	0.601074	0.620329	5.80945	26.2354
P1164	1164	F730-R1101	1	SRR18821563	Yang_2023_Ecoind	Aquatic	Arid	Sediments	7	Not_recorded	26.22	100.58	1237	15.28	0.527	86	7.11155	15.4305	0.475003	0.602209	4.52881	25.6232
P1165	1165	F730-R1101	1	SRR18821562	Yang_2023_Ecoind	Aquatic	Arid	Sediments	7	Not_recorded	26.55	101.86	1064	22.29	0.4877	6.25	7.7151	16.7336	0.528391	0.604111	5.37416	27.6995
P1166	1166	F730-R1101	1	SRR18821560	Yang_2023_Ecoind	Aquatic	Arid	Sediments	7	Not_recorded	26.9	102.94	882	17.12	0.595	124.33	7.62891	15.9721	0.478525	0.593189	7.14552	26.9259
P1167	1167	F730-R1101	1	SRR18821561	Yang_2023_Ecoind	Aquatic	Temperate	Sediments	7	Not_recorded	28.63	103.89	405	16.86	1.124	125.67	8.59801	15.4988	0.476895	0.58379	7.38958	26.5486
P1168	1168	F730-R1101	1	SRR18821559	Yang_2023_Ecoind	Aquatic	Temperate	Sediments	7	Not_recorded	28.78	104.73	259	17.36	1.1108	117.08	6.61456	15.8596	0.569622	0.595674	5.07038	26.6247
P1169	1169	F730-R1101	1	SRR18821558	Yang_2023_Ecoind	Aquatic	Temperate	Sediments	7	Not_recorded	28.86	105.62	271	17.46	1.0739	116.5	8.99139	15.1267	0.519345	0.581142	5.33592	26.0293
P1170	1170	F730-R1101	1	SRR18821557	Yang_2023_Ecoind	Aquatic	Temperate	Sediments	7	Not_recorded	29.21	106.21	189	16.28	1.031	97.33	7.66266	15.1305	0.406426	0.586891	7.21403	25.7808
P1171	1171	F730-R1101	1	SRR18821556	Yang_2023_Ecoind	Aquatic	Temperate	Sediments	7	Not_recorded	29.56	106.72	174	15.8	1.0498	87.5	9.50665	15.9302	0.524921	0.588572	5.57451	27.0659
P1172	1172	F730-R1101	1	SRR18821555	Yang_2023_Ecoind	Aquatic	Temperate	Sediments	7	Not_recorded	29.83	107.48	140	16.51	1.1043	115.25	7.45691	16.1396	0.441148	0.592864	5.88291	27.223
P1173	1173	F730-R1101	1	SRR18821553	Yang_2023_Ecoind	Aquatic	Temperate	Sediments	7	Not_recorded	30.85	108.44	195	16.32	1.1172	107.5	7.8432	15.6063	0.604117	0.621085	6.25121	25.1274
P1174	1174	F730-R1101	1	SRR18821552	Yang_2023_Ecoind	Aquatic	Temperate	Sediments	7	Not_recorded	30.65	111.32	50	16.98	0.8597	101.67	7.08756	16.4851	0.532719	0.601527	7.82174	27.4055
P1175	1175	F730-R1101	1	SRR18821551	Yang_2023_Ecoind	Aquatic	Temperate	Sediments	7	Not_recorded	30.21	112.26	31	17.27	0.91	106.67	7.23455	16.541	0.363257	0.579023	6.26383	28.5671
P1176	1176	F730-R1101	1	SRR18821549	Yang_2023_Ecoind	Aquatic	Temperate	Sediments	7	Not_recorded	29.73	112.9	31	16.98	1.0107	89.5	6.76186	16.4054	0.608793	0.616679	6.59537	26.6027
P1177	1177	F730-R1101	1	SRR18821550	Yang_2023_Ecoind	Aquatic	Temperate	Sediments	7	Not_recorded	29.83	113.51	23	16.56	1.0366	91.83	8.07832	17.1121	0.452501	0.609171	5.63936	28.0908
P1178	1178	F730-R1101	1	SRR18821548	Yang_2023_Ecoind	Aquatic	Temperate	Sediments	7	Not_recorded	30.21	114.08	22	17.04	1.0195	111.33	8.6119	15.4893	0.364817	0.594509	3.82468	26.0539
P1179	1179	F730-R1101	1	SRR18821547	Yang_2023_Ecoind	Aquatic	Temperate	Sediments	7	Not_recorded	30.66	114.53	23	17.22	0.9989	117.33	7.63472	16.6843	0.412406	0.596815	6.32942	27.9556
P1180	1180	F730-R1101	1	SRR18821546	Yang_2023_Ecoind	Aquatic	Temperate	Sediments	7	Not_recorded	30.4	114.96	19	17.1	1.0353	105.67	5.68267	15.4021	0.509389	0.591754	5.52291	26.0279
P1181	1181	F730-R1101	1	SRR18821545	Yang_2023_Ecoind	Aquatic	Temperate	Sediments	7	Not_recorded	30.22	115.13	24	16.96	1.0653	104	6.90763	15.6147	0.47693	0.627325	6.10746	24.8909
P1182	1182	F730-R1101	1	SRR18821544	Yang_2023_Ecoind	Aquatic	Temperate	Sediments	7	Not_recorded	29.83	115.59	20	18.2	1.0456	94.75	7.78329	15.7438	0.57747	0.604273	5.9775	26.0541
P1183	1183	F730-R1101	1	SRR18821541	Yang_2023_Ecoind	Aquatic	Temperate	Sediments	7	Not_recorded	29.75	116.03	26	16.5	1.0053	91.58	7.97016	15.8398	0.53606	0.569291	6.43677	27.8238
P1184	1184	F730-R1101	1	SRR18821540	Yang_2023_Ecoind	Aquatic	Temperate	Sediments	7	Not_recorded	29.96	116.59	7	19.04	1.0915	69.42	7.82666	15.7941	0.535072	0.573811	4.22576	27.5249
P1185	1185	F730-R1101	1	SRR18821539	Yang_2023_Ecoind	Aquatic	Temperate	Sediments	7	Not_recorded	30.49	117.02	15	17.77	1.1455	98.67	9.47196	15.968	0.48608	0.616778	6.88885	25.8894
P1186	1186	F730-R1101	1	SRR18821538	Yang_2023_Ecoind	Aquatic	Temperate	Sediments	7	Not_recorded	30.78	117.69	7	18.49	1.0795	100.25	9.1874	16.6759	0.510123	0.583846	5.42615	28.5622
P1187	1187	F730-R1101	1	SRR18821537	Yang_2023_Ecoind	Aquatic	Temperate	Sediments	7	Not_recorded	31.08	117.92	9	18.13	1.0141	105.33	9.00179	15.1815	0.531932	0.593111	4.25518	25.5963
P1188	1188	F730-R1101	1	SRR18821536	Yang_2023_Ecoind	Aquatic	Temperate	Sediments	7	Not_recorded	31.37	118.33	6	18.63	0.909	91.92	8.95609	15.4309	0.591618	0.582159	7.08033	26.5064
P1189	1189	F730-R1101	1	SRR18821599	Yang_2023_Ecoind	Aquatic	Temperate	Sediments	7	Not_recorded	31.89	118.57	5	18.54	0.811	94.08	8.56028	17.482	0.475243	0.585852	7.02059	29.8403
P1190	1190	F730-R1101	1	SRR18821598	Yang_2023_Ecoind	Aquatic	Temperate	Sediments	7	Not_recorded	32.19	118.98	2	9.62	0.7848	54.92	8.7696	15.7927	0.523934	0.59095	6.04594	26.7243
P1191	1191	F730-R1101	1	SRR18821597	Yang_2023_Ecoind	Aquatic	Temperate	Sediments	7	Not_recorded	32.2	119.57	1	2.66	0.7843	38.25	5.86804	15.8329	0.456713	0.642877	5.15109	24.6282
P1192	1192	F730-R1101	1	SRR18821596	Yang_2023_Ecoind	Aquatic	Temperate	Sediments	7	Not_recorded	32	119.96	0	-1.92	0.7826	34.75	7.19088	15.075	0.650784	0.623303	6.20691	24.1857
P1193	1193	F730-R1101	1	SRR18821594	Yang_2023_Ecoind	Aquatic	Temperate	Sediments	7	Not_recorded	31.88	120.93	2	20.5	0.8228	68.5	9.54427	16.8153	0.569145	0.607025	6.08345	27.7011
P1194	1194	F730-R1101	1	SRR18821593	Yang_2023_Ecoind	Aquatic	Temperate	Sediments	7	Not_recorded	31.73	121.67	2	21.15	0.8617	64	8.03669	16.009	0.586945	0.637097	7.47053	25.128
P1195	1195	F730-R1101	1	SRR18821592	Yang_2023_Ecoind	Aquatic	Temperate	Sediments	7	Not_recorded	31.47	121.76	4000	13.31	0.8228	74.75	8.24973	15.4511	0.5646	0.60945	6.11034	25.3526
P1196	1196	F730-R1101	1	SRR18821591	Yang_2023_Ecoind	Aquatic	Temperate	Sediments	7	Not_recorded	31.43	121.59	4000	14.68	0.384	72.75	8.85512	17.2989	0.690219	0.574242	5.23314	30.1247
P1197	1197	F730-R1101	1	SRR18821590	Yang_2023_Ecoind	Aquatic	Polar	Sediments	7	Not_recorded	34.08	95.75	4110	15.59	0.384	82.75	8.83657	14.5578	0.495232	0.577613	4.25149	25.2035
P1198	1198	F730-R1101	1	SRR18821589	Yang_2023_Ecoind	Aquatic	Arid	Sediments	7	Not_recorded	29.79	99.02	2676	15.13	0.4921	84.5	7.75345	16.8297	0.500876	0.590115	5.8658	28.5193
P1199	1199	F730-R1101	1	SRR18821588	Yang_2023_Ecoind	Aquatic	Polar	Sediments	7	Not_recorded	33.35	96.97	3669	15.63	0.3784	83.58	6.87973	17.0335	0.539433	0.588999	6.92159	28.9194
P1200	1200	F730-R1101	1	SRR18821587	Yang_2023_Ecoind	Aquatic	Arid	Sediments	7	Not_recorded	28.23	99.31	2049	15.76	0.6774	84	8.86434	15.6273	0.387245	0.618955	6.30007	25.2479
P1201	1201	F730-R1101	1	SRR18821586	Yang_2023_Ecoind	Aquatic	Temperate	Sediments	7	Not_recorded	27	100.07	1911	15.57	0.6699	84.92	7.94844	15.8127	0.477966	0.557362	7.07738	28.3707
P1202	1202	F730-R1101	1	SRR18821585	Yang_2023_Ecoind	Aquatic	Arid	Sediments	7	Not_recorded	26.22	100.58	1237	15.28	0.527	86	8.29437	16.4697	0.592955	0.63076	6.67811	26.1109
P1203	1203	F730-R1101	1	SRR18821583	Yang_2023_Ecoind	Aquatic	Arid	Sediments	7	Not_recorded	26.55	101.86	1064	22.29	0.4877	6.25	6.95939	17.625	0.455849	0.574257	6.84367	30.6919
P1204	1204	F730-R1101	1	SRR18821582	Yang_2023_Ecoind	Aquatic	Arid	Sediments	7	Not_recorded	26.9	102.94	882	17.12	0.595	124.33	7.85551	17.1882	0.617574	0.579726	6.88022	29.6489
P1205	1205	F730-R1101	1	SRR18821581	Yang_2023_Ecoind	Aquatic	Temperate	Sediments	7	Not_recorded	28.63	103.89	405	16.86	1.124	125.67	6.86461	15.7424	0.532275	0.587956	8.31116	26.7747
P1206	1206	F730-R1101	1	SRR18821580	Yang_2023_Ecoind	Aquatic	Temperate	Sediments	7	Not_recorded	28.78	104.73	259	17.36	1.1108	117.08	9.07254	15.2693	0.549542	0.599816	6.24211	25.4566
P1207	1207	F730-R1101	1	SRR18821579	Yang_2023_Ecoind	Aquatic	Temperate	Sediments	7	Not_recorded	28.86	105.62	271	17.46	1.0739	116.5	7.86009	15.1915	0.418981	0.619626	4.15404	24.5172
P1208	1208	F730-R1101	1	SRR18821578	Yang_2023_Ecoind	Aquatic	Temperate	Sediments	7	Not_recorded	29.21	106.21	189	16.28	1.031	97.33	6.29188	15.6234	0.369754	0.614361	6.68409	25.4303
P1209	1209	F730-R1101	1	SRR18821577	Yang_2023_Ecoind	Aquatic	Temperate	Sediments	7	Not_recorded	29.56	106.72	174	15.8	1.0498	87.5	8.33323	16.0199	0.446546	0.619918	4.84262	25.842
P1210	1210	F730-R1101	1	SRR18821576	Yang_2023_Ecoind	Aquatic	Temperate	Sediments	7	Not_recorded	29.83	107.48	140	16.51	1.1043	115.25	7.78785	15.2491	0.542899	0.59062	3.65785	25.8188
P1211	1211	F730-R1101	1	SRR18821575	Yang_2023_Ecoind	Aquatic	Temperate	Sediments	7	Not_recorded	30.85	108.44	195	16.32	1.1172	107.5	8.55297	16.2249	0.502475	0.661524	4.97913	24.5265
P1212	1212	F730-R1101	1	SRR18821574	Yang_2023_Ecoind	Aquatic	Temperate	Sediments	7	Not_recorded	30.65	111.32	50	16.98	0.8597	101.67	8.27073	17.5866	0.430693	0.635769	7.0678	27.6619
P1213	1213	F730-R1101	1	SRR18821572	Yang_2023_Ecoind	Aquatic	Temperate	Sediments	7	Not_recorded	30.21	112.26	31	17.27	0.91	106.67	8.82555	15.3583	0.574034	0.597117	5.57553	25.7208
P1214	1214	F730-R1101	1	SRR18821571	Yang_2023_Ecoind	Aquatic	Temperate	Sediments	7	Not_recorded	29.73	112.9	31	16.98	1.0107	89.5	7.56305	16.4607	0.432549	0.613587	6.7757	26.827
P1215	1215	F730-R1101	1	SRR18821570	Yang_2023_Ecoind	Aquatic	Temperate	Sediments	7	Not_recorded	29.83	113.51	23	16.56	1.0366	91.83	7.94815	16.9042	0.413141	0.562398	6.17581	30.0574
P1216	1216	F730-R1101	1	SRR18821569	Yang_2023_Ecoind	Aquatic	Temperate	Sediments	7	Not_recorded	30.21	114.08	22	17.04	1.0195	111.33	8.07517	16.383	0.548793	0.614842	6.63983	26.6459
P1217	1217	F730-R1101	1	SRR18821568	Yang_2023_Ecoind	Aquatic	Temperate	Sediments	7	Not_recorded	30.66	114.53	23	17.22	0.9989	117.33	7.22489	15.2171	0.629144	0.596845	6.55841	25.4959
P1218	1218	F730-R1101	1	SRR18821511	Yang_2023_Ecoind	Aquatic	Temperate	Sediments	7	Not_recorded	30.4	114.96	19	17.1	1.0353	105.67	7.83038	15.6671	0.542204	0.565468	4.22715	27.7065
P1219	1219	F730-R1101	1	SRR18821510	Yang_2023_Ecoind	Aquatic	Temperate	Sediments	7	Not_recorded	30.22	115.13	24	16.96	1.0653	104	7.00499	15.5712	0.550297	0.600543	6.74317	25.9285
P1220	1220	F730-R1101	1	SRR18821509	Yang_2023_Ecoind	Aquatic	Temperate	Sediments	7	Not_recorded	29.83	115.59	20	18.2	1.0456	94.75	7.95652	15.4092	0.482705	0.603192	4.99691	25.5461
P1221	1221	F730-R1101	1	SRR18821508	Yang_2023_Ecoind	Aquatic	Temperate	Sediments	7	Not_recorded	29.75	116.03	26	16.5	1.0053	91.58	7.86625	16.4272	0.630788	0.608185	7.52422	27.0103
P1222	1222	F730-R1101	1	SRR18821507	Yang_2023_Ecoind	Aquatic	Temperate	Sediments	7	Not_recorded	29.96	116.59	7	19.04	1.0915	69.42	7.36369	17.1733	0.399181	0.607373	5.00593	28.2747
P1223	1223	F730-R1101	1	SRR18821505	Yang_2023_Ecoind	Aquatic	Temperate	Sediments	7	Not_recorded	30.49	117.02	15	17.77	1.1455	98.67	9.01046	15.5139	0.536843	0.606245	5.26358	25.5902
P1224	1224	F730-R1101	1	SRR18821504	Yang_2023_Ecoind	Aquatic	Temperate	Sediments	7	Not_recorded	30.78	117.69	7	18.49	1.0795	100.25	7.81127	16.0398	0.544139	0.60452	6.82511	26.5332
P1225	1225	F730-R1101	1	SRR18821503	Yang_2023_Ecoind	Aquatic	Temperate	Sediments	7	Not_recorded	31.08	117.92	9	18.13	1.0141	105.33	7.91828	16.9411	0.362537	0.575665	4.45935	29.4288
P1226	1226	F730-R1101	1	SRR18821501	Yang_2023_Ecoind	Aquatic	Temperate	Sediments	7	Not_recorded	31.37	118.33	6	18.63	0.909	91.92	8.98068	16.4953	0.555301	0.631407	6.89239	26.1247
P1227	1227	F730-R1101	1	SRR18821502	Yang_2023_Ecoind	Aquatic	Temperate	Sediments	7	Not_recorded	31.89	118.57	5	18.54	0.811	94.08	8.16171	17.4543	0.460611	0.60636	7.17338	28.7855
P1228	1228	F730-R1101	1	SRR18821500	Yang_2023_Ecoind	Aquatic	Temperate	Sediments	7	Not_recorded	32.19	118.98	2	9.62	0.7848	54.92	9.12347	15.976	0.595194	0.613559	5.32187	26.0383
P1229	1229	F730-R1101	1	SRR18821499	Yang_2023_Ecoind	Aquatic	Temperate	Sediments	7	Not_recorded	32.2	119.57	1	2.66	0.7843	38.25	8.17796	16.724	0.450139	0.597131	7.3656	28.0072
P1230	1230	F730-R1101	1	SRR18821498	Yang_2023_Ecoind	Aquatic	Temperate	Sediments	7	Not_recorded	32	119.96	0	-1.92	0.7826	34.75	7.94839	16.1692	0.325835	0.588364	5.70817	27.4816
P1231	1231	F730-R1101	1	SRR18821496	Yang_2023_Ecoind	Aquatic	Temperate	Sediments	7	Not_recorded	31.88	120.93	2	20.5	0.8228	68.5	8.01377	15.6969	0.501749	0.604679	6.21979	25.9591
P1232	1232	F730-R1101	1	SRR18821497	Yang_2023_Ecoind	Aquatic	Temperate	Sediments	7	Not_recorded	31.73	121.67	2	21.15	0.8617	64	7.90115	14.6517	0.463537	0.595332	6.82575	24.6109
P1233	1233	F730-R1101	1	SRR18821493	Yang_2023_Ecoind	Aquatic	Temperate	Sediments	7	Not_recorded	31.47	121.76	4000	13.31	0.8228	74.75	8.7591	15.4145	0.497209	0.613807	6.24885	25.113
P1234	1234	F730-R1101	1	SRR18821494	Yang_2023_Ecoind	Aquatic	Temperate	Sediments	7	Not_recorded	31.43	121.59	4000	14.68	0.384	72.75	7.94327	15.664	0.569214	0.594634	6.31016	26.3422
P1235	1235	F733-R1083	2	SRR11796241	Li_2021_FES	Croplands	Temperate	Croplands	4	Rice-wheat	32.1137	118.485	7	15.4	0.7639	1200	7.3933	23.9605	2.19605	0.736702	2.98875	32.524
P1236	1236	F733-R1083	2	SRR11796240	Li_2021_FES	Croplands	Temperate	Croplands	4	Rice-wheat	32.1108	118.476	6	15.4	0.7603	1200	6.88845	22.5301	1.42191	0.56541	9.28717	39.8474
P1237	1237	F733-R1083	2	SRR11796239	Li_2021_FES	Croplands	Temperate	Croplands	4	Rice-wheat	32.1048	118.465	7	15.4	0.7623	1200	6.8978	14.4968	1.28176	0.478253	16.6405	30.312
P1238	1238	F733-R1083	2	SRR11796238	Li_2021_FES	Croplands	Temperate	Croplands	4	Rice-wheat	32.0973	118.484	12	15.4	0.7719	1200	7.02734	6.89113	1.86432	0.636456	14.5659	10.8273
P1239	1239	F733-R1083	2	SRR11796237	Li_2021_FES	Croplands	Temperate	Croplands	4	nightshades-legumes	32.1002	118.487	9	15.4	0.7714	1200	5.33199	11.7554	2.62837	0.630891	75.4975	18.6331
P1240	1240	F733-R1083	2	SRR11796236	Li_2021_FES	Croplands	Temperate	Croplands	4	nightshades-legumes	32.1059	118.484	9	15.4	0.7714	1200	5.52922	16.2905	1.86389	0.568544	80.5945	28.6529
P1241	1241	F733-R1083	2	SRR11796235	Li_2021_FES	Croplands	Temperate	Croplands	4	nightshades-legumes	32.1089	118.481	6	15.4	0.7603	1200	6.62455	25.2322	1.39456	0.60051	112.249	42.018
P1242	1242	F733-R1083	2	SRR11796234	Li_2021_FES	Croplands	Temperate	Croplands	4	nightshades-legumes	32.1062	118.483	7	15.4	0.768	1200	7.64844	13.0957	2.39254	0.63461	73.8768	20.6358
P1243	1243	F733-R1083	2	SRR11796232	Li_2021_FES	Croplands	Temperate	Croplands	4	Peach	32.0853	118.576	119	15.4	0.7989	1200	7.81748	11.0318	1.13105	0.534148	2.38403	20.6531
P1244	1244	F733-R1083	2	SRR11796231	Li_2021_FES	Croplands	Temperate	Croplands	4	Peach	32.0844	118.573	179	15.4	0.8115	1200	7.99742	8.3658	1.14058	0.552072	39.3686	15.1534
P1245	1245	F733-R1083	2	SRR11796230	Li_2021_FES	Croplands	Temperate	Croplands	4	Peach	32.0517	118.541	168	15.4	0.8154	1200	5.50513	11.6025	1.27029	0.600754	13.7319	19.3133
P1246	1246	F733-R1083	2	SRR11796229	Li_2021_FES	Croplands	Temperate	Croplands	4	Peach	32.0449	118.509	114	15.4	0.8108	1200	8.99149	10.6413	0.89017	0.544788	27.469	19.5329
P1247	1247	F733-R1083	2	SRR11796228	Li_2021_FES	Croplands	Temperate	Croplands	4	Tea	32.0854	118.573	179	15.4	0.8115	1200	6.97457	12.9472	1.06133	0.416616	0.546575	31.0771
P1248	1248	F733-R1083	2	SRR11796271	Li_2021_FES	Croplands	Temperate	Croplands	4	Tea	32.062	118.598	34	15.4	0.7901	1200	6.90494	-1.59799	1.01196	0.578152	1.19861	-2.76396
P1249	1249	F733-R1083	2	SRR11796270	Li_2021_FES	Croplands	Temperate	Croplands	4	Tea	32.0526	118.546	121	15.4	0.8055	1200	4.67086	4.72131	1.22594	0.549452	1.13958	8.59277
P1250	1250	F733-R1083	2	SRR11796269	Li_2021_FES	Croplands	Temperate	Croplands	4	Tea	32.0518	118.545	121	15.4	0.8055	1200	5.11695	9.01572	0.964713	0.407087	0.756029	22.1469
P1251	1251	F730-R1101	1	SRR11431570	Sun_2020_SBB	Forests	Temperate	Temperate_Forests	8	Aphanamixis polystachya, Schefflera octophylla	21.46	110.91	29	23	1.2072	1550	3.88965	18.7833	1.17559	0.21596	16.8059	86.976
P1252	1252	F730-R1101	1	SRR11431569	Sun_2020_SBB	Forests	Temperate	Temperate_Forests	8	Aphanamixis polystachya, Schefflera octophylla	21.46	110.91	29	23	1.2072	1550	4.0608	17.8398	1.2926	0.219716	16.4493	81.195
P1253	1253	F730-R1101	1	SRR11431568	Sun_2020_SBB	Forests	Temperate	Temperate_Forests	8	Aphanamixis polystachya, Schefflera octophylla	21.46	110.91	29	23	1.2072	1550	4.0848	20.0452	0.955667	0.20321	18.0847	98.6428
P1254	1254	F730-R1101	1	SRR11431567	Sun_2020_SBB	Forests	Temperate	Temperate_Forests	8	Aphanamixis polystachya, Schefflera octophylla	21.46	110.91	29	23	1.2072	1550	3.97419	18.1057	1.1896	0.198439	17.6914	91.2405
P1255	1255	F730-R1101	1	SRR11431566	Sun_2020_SBB	Forests	Temperate	Temperate_Forests	8	Aphanamixis polystachya, Schefflera octophylla	21.46	110.91	29	23	1.2072	1550	4.08736	34.6971	1.27932	0.282912	13.0935	122.643
P1256	1256	F730-R1101	1	SRR11431565	Sun_2020_SBB	Forests	Temperate	Temperate_Forests	8	Aphanamixis polystachya, Schefflera octophylla	21.46	110.91	29	23	1.2072	1550	4.42042	34.9746	1.32377	0.294243	15.0415	118.863
P1257	1257	F730-R1101	1	SRR11431564	Sun_2020_SBB	Forests	Temperate	Temperate_Forests	8	Aphanamixis polystachya, Schefflera octophylla	21.46	110.91	29	23	1.2072	1550	4.17853	32.0702	1.37371	0.244146	14.9255	131.357
P1258	1258	F730-R1101	1	SRR11431563	Sun_2020_SBB	Forests	Temperate	Temperate_Forests	8	Aphanamixis polystachya, Schefflera octophylla	21.46	110.91	29	23	1.2072	1550	4.20848	35.2977	1.0943	0.258486	15.0302	136.555
P1259	1259	F730-R1101	1	SRR23697650	Yuan_2023_WaterRes	Aquatic	Temperate	Sediments	7	Not_recorded	31.47	118.95	4	15.5708	0.8892	1107	9.2	22	7.5	0.32	10.14	68.75
P1260	1260	F730-R1101	1	SRR23697651	Yuan_2023_WaterRes	Aquatic	Temperate	Sediments	7	Not_recorded	31.47	118.95	4	15.5708	0.8892	1107	8.3	12	8	0.31	7.35	38.7097
P1261	1261	F730-R1101	1	SRR23697652	Yuan_2023_WaterRes	Aquatic	Temperate	Sediments	7	Not_recorded	31.47	118.95	4	15.5708	0.8892	1107	8.5	7	6.5	0.33	5.955	21.2121
P1262	1262	F730-R1101	1	SRR23697653	Yuan_2023_WaterRes	Aquatic	Temperate	Sediments	7	Not_recorded	31.47	118.95	4	15.5708	0.8892	1107	10	29.5	7.5	0.38	12.2325	77.6316
P1263	1263	F730-R1101	1	SRR23697654	Yuan_2023_WaterRes	Aquatic	Temperate	Sediments	7	Not_recorded	31.47	118.95	4	15.5708	0.8892	1107	8.05	11	9	0.37	7.071	29.7297
P1264	1264	F730-R1101	1	SRR23697655	Yuan_2023_WaterRes	Aquatic	Temperate	Sediments	7	Not_recorded	31.47	118.95	4	15.5708	0.8892	1107	8.4	8	17.5	0.39	6.234	20.5128
P1265	1265	F730-R1101	1	SRR23697656	Yuan_2023_WaterRes	Aquatic	Temperate	Sediments	7	Not_recorded	31.47	118.95	4	15.5708	0.8892	1107	9.8	19	9	0.57	9.303	33.3333
P1266	1266	F730-R1101	1	SRR23697657	Yuan_2023_WaterRes	Aquatic	Temperate	Sediments	7	Not_recorded	31.47	118.95	4	15.5708	0.8892	1107	8.1	12	12	0.58	7.35	20.6897
P1267	1267	F730-R1101	1	SRR23697658	Yuan_2023_WaterRes	Aquatic	Temperate	Sediments	7	Not_recorded	31.47	118.95	4	15.5708	0.8892	1107	8.3	10	7.5	0.55	6.792	18.1818
P1268	1268	F733-R1083	2	BC13	This study	Desert_biocrusts	Arid	Deserts	5	Biocrusts	44.6075	88.2486	550	7.2	0.0984	164	6.38	20.6	2.2	0.58	15	35.5172
P1269	1269	F733-R1083	2	BC14	This study	Desert_biocrusts	Arid	Deserts	5	Biocrusts	44.6075	88.2486	550	7.2	0.0984	164	6.3	13.8	1.32	0.27	14	51.1111
P1270	1270	F733-R1083	2	BC15	This study	Desert_biocrusts	Arid	Deserts	5	Biocrusts	44.6075	88.2486	550	7.2	0.0984	164	6.56	25.5	2.3	1.75	25	14.5714
P1271	1271	F733-R1083	2	BC16	This study	Desert_biocrusts	Arid	Deserts	5	Biocrusts	44.6075	88.2486	550	7.2	0.0984	164	7.68	1.70413	1.38503	0.412853	14.9	4.12769
P1272	1272	F733-R1083	2	BC17	This study	Desert_biocrusts	Arid	Deserts	5	Biocrusts	44.6086	88.25	558	7.2	0.0995	164	7.51	3.1757	2.58693	0.35321	9.3	8.99098
P1273	1273	F733-R1083	2	BC19	This study	Desert_biocrusts	Arid	Deserts	5	Biocrusts	44.6075	88.2486	550	7.2	0.0984	164	7.93	1.12499	1.18645	0.340468	4.3	3.30426
P1274	1274	F733-R1083	2	BC20	This study	Desert_biocrusts	Arid	Deserts	5	Biocrusts	44.6075	88.2486	550	7.2	0.0984	164	7.78	1.35269	1.01585	0.234625	5.3	5.76534
P1275	1275	F733-R1083	2	BC21	This study	Desert_biocrusts	Arid	Deserts	5	Biocrusts	44.6075	88.2486	550	7.2	0.0984	164	8.1	1.29374	1.37527	0.370075	4.8	3.4959
P1276	1276	F733-R1083	2	BC22	This study	Desert_biocrusts	Arid	Deserts	5	Biocrusts	44.6075	88.2486	550	7.2	0.0984	164	8.33	0.904052	1.00104	0.360717	4.4	2.50626
P1277	1277	F733-R1083	2	BC23	This study	Desert_biocrusts	Arid	Deserts	5	Biocrusts	44.6086	88.25	558	7.2	0.0995	164	7.73	1.20928	1.11461	0.302698	4.7	3.99499
P1278	1278	F733-R1083	2	BC25	This study	Desert_biocrusts	Arid	Deserts	5	Biocrusts	44.6075	88.2486	550	7.2	0.0984	164	8.21	0.563509	0.704183	0.246877	4	2.28255
P1279	1279	F733-R1083	2	BC26	This study	Desert_biocrusts	Arid	Deserts	5	Biocrusts	44.6075	88.2486	550	7.2	0.0984	164	8.12	0.656334	0.855694	0.364563	6.9	1.80033
P1280	1280	F733-R1083	2	BC27	This study	Desert_biocrusts	Arid	Deserts	5	Biocrusts	44.6075	88.2486	550	7.2	0.0984	164	8.53	0.515691	0.352162	0.239206	3.3	2.15585
P1281	1281	F733-R1083	2	BC28	This study	Desert_biocrusts	Arid	Deserts	5	Biocrusts	44.6075	88.2486	550	7.2	0.0984	164	8.19	0.532118	0.574968	0.192231	4.3	2.76812
P1282	1282	F733-R1083	2	BC29	This study	Desert_biocrusts	Arid	Deserts	5	Biocrusts	44.6086	88.25	558	7.2	0.0995	164	8.2	0.405075	0.506571	0.21905	4.7	1.84923
P1283	1283	F733-R1083	2	BC49	This study	Desert_biocrusts	Arid	Deserts	5	Biocrusts	44.6075	88.2486	550	7.2	0.0984	164	8.44	0.390917	0.520112	0.351225	17	1.11301
P1284	1284	F733-R1083	2	BC50	This study	Desert_biocrusts	Arid	Deserts	5	Biocrusts	44.6075	88.2486	550	7.2	0.0984	164	8.09	0.275666	0.276699	0.265645	6.2	1.03772
P1285	1285	F733-R1083	2	BC51	This study	Desert_biocrusts	Arid	Deserts	5	Biocrusts	44.6075	88.2486	550	7.2	0.0984	164	8.44	0.35231	0.436662	0.360675	8.8	0.976807
P1286	1286	F733-R1083	2	BC52	This study	Desert_biocrusts	Arid	Deserts	5	Biocrusts	44.6075	88.2486	550	7.2	0.0984	164	8.35	0.383767	0.387225	0.29597	8.4	1.29664
P1287	1287	F733-R1083	2	BC53	This study	Desert_biocrusts	Arid	Deserts	5	Biocrusts	44.6086	88.25	558	7.2	0.0995	164	8.61	0.372535	0.296674	0.232719	6.8	1.60079
P1288	1288	F733-R1083	2	BC55	This study	Desert_biocrusts	Arid	Deserts	5	Biocrusts	44.6075	88.2486	550	7.2	0.0984	164	8.47	0.160796	0.240139	0.259507	4.7	0.619621
P1289	1289	F733-R1083	2	BC56	This study	Desert_biocrusts	Arid	Deserts	5	Biocrusts	44.6075	88.2486	550	7.2	0.0984	164	8.3	0.181154	0.241625	0.295199	5.5	0.613666
P1290	1290	F733-R1083	2	BC57	This study	Desert_biocrusts	Arid	Deserts	5	Biocrusts	44.6075	88.2486	550	7.2	0.0984	164	8.66	0.120804	0.386269	0.315621	5.7	0.382749
P1291	1291	F733-R1083	2	BC58	This study	Desert_biocrusts	Arid	Deserts	5	Biocrusts	44.6075	88.2486	550	7.2	0.0984	164	8.73	0.464372	0.165364	0.305746	3.7	1.51882
P1292	1292	F733-R1083	2	BC59	This study	Desert_biocrusts	Arid	Deserts	5	Biocrusts	44.6086	88.25	558	7.2	0.0995	164	8.65	0.585109	0.299899	0.227137	4.3	2.57602
P1293	1293	F733-R1083	2	BC61	This study	Desert_biocrusts	Arid	Deserts	5	Biocrusts	44.6075	88.2486	550	7.2	0.0984	164	8.91	0.246228	0.240234	0.305351	5.2	0.806376
P1294	1294	F733-R1083	2	BC62	This study	Desert_biocrusts	Arid	Deserts	5	Biocrusts	44.6075	88.2486	550	7.2	0.0984	164	8.45	0.211527	0.240282	0.272574	5.4	0.776035
P1295	1295	F733-R1083	2	BC63	This study	Desert_biocrusts	Arid	Deserts	5	Biocrusts	44.6075	88.2486	550	7.2	0.0984	164	8.81	0.105632	0.148411	0.165478	3.5	0.638343
P1296	1296	F733-R1083	2	BC64	This study	Desert_biocrusts	Arid	Deserts	5	Biocrusts	44.6075	88.2486	550	7.2	0.0984	164	8.66	0.175921	0.166036	0.172688	5.7	1.01872
P1297	1297	F733-R1083	2	BC65	This study	Desert_biocrusts	Arid	Deserts	5	Biocrusts	44.6086	88.25	558	7.2	0.0995	164	8.59	0.158289	0.204922	0.207753	4.8	0.761909
P1298	1298	F733-R1083	2	BC73	This study	Desert_biocrusts	Arid	Deserts	5	Biocrusts	44.6075	88.2486	550	7.2	0.0984	164	8.43	0.241409	0.220747	0.136769	3	1.76508
P1299	1299	F733-R1083	2	BC74	This study	Desert_biocrusts	Arid	Deserts	5	Biocrusts	44.6075	88.2486	550	7.2	0.0984	164	8.37	0.0689567	0.297414	0.106542	3.5	0.647227
P1300	1300	F733-R1083	2	BC75	This study	Desert_biocrusts	Arid	Deserts	5	Biocrusts	44.6075	88.2486	550	7.2	0.0984	164	7.93	0.137948	0.202913	0.187407	3.2	0.736087
P1301	1301	F733-R1083	2	BC76	This study	Desert_biocrusts	Arid	Deserts	5	Biocrusts	44.6075	88.2486	550	7.2	0.0984	164	8.93	0.165576	0.203094	0.125905	3.9	1.31509
P1302	1302	F733-R1083	2	BC77	This study	Desert_biocrusts	Arid	Deserts	5	Biocrusts	44.6075	88.2486	550	7.2	0.0984	164	8.62	0.121821	0.29538	0.170778	3.9	0.713328
P1303	1303	F733-R1083	2	BC91	This study	Desert_biocrusts	Arid	Deserts	5	Biocrusts	37.5039	105.046	1263	9.4	0.1298	193	7.62	1.77323	2.20897	0.398287	6.4	4.45213
P1304	1304	F733-R1083	2	BC92	This study	Desert_biocrusts	Arid	Deserts	5	Biocrusts	37.5039	105.046	1263	9.4	0.1298	193	7.94	2.01187	2.29603	0.390766	9.7	5.14854
P1305	1305	F733-R1083	2	BC93	This study	Desert_biocrusts	Arid	Deserts	5	Biocrusts	37.5039	105.046	1263	9.4	0.1298	193	8.05	2.48469	2.99091	0.384347	6.6	6.46472
P1306	1306	F733-R1083	2	BC94	This study	Desert_biocrusts	Arid	Deserts	5	Biocrusts	37.5039	105.046	1263	9.4	0.1298	193	7.85	4.02641	4.43892	0.393286	5.6	10.2379
P1307	1307	F733-R1083	2	BC95	This study	Desert_biocrusts	Arid	Deserts	5	Biocrusts	37.5039	105.046	1263	9.4	0.1298	193	8.22	3.78227	3.14052	0.383313	4.9	9.86731
P1308	1308	F733-R1083	2	BC97	This study	Desert_biocrusts	Arid	Deserts	5	Biocrusts	38.7067	110.076	1165	9.4	0.265	193	8.26	2.56301	4.19879	0.38473	4.9	6.66184
P1309	1309	F733-R1083	2	BC98	This study	Desert_biocrusts	Arid	Deserts	5	Biocrusts	38.7067	110.076	1165	9.4	0.265	193	8.57	1.44972	1.77447	0.34159	9.9	4.24404
P1310	1310	F733-R1083	2	BC99	This study	Desert_biocrusts	Arid	Deserts	5	Biocrusts	38.7083	110.077	1165	9.4	0.265	193	8.11	0.508429	1.12226	0.284516	3.7	1.78699
P1311	1311	F733-R1083	2	BC100	This study	Desert_biocrusts	Arid	Deserts	5	Biocrusts	38.7075	110.076	1165	9.4	0.265	193	8.42	1.43476	1.72703	0.329758	4.4	4.35094
P1312	1312	F733-R1083	2	BC101	This study	Desert_biocrusts	Arid	Deserts	5	Biocrusts	38.7056	110.076	1165	9.4	0.265	193	8.66	1.53974	1.53581	0.347705	4.2	4.42829
P1313	1313	F733-R1083	2	BC103	This study	Desert_biocrusts	Arid	Deserts	5	Biocrusts	40.0514	108.669	1369	9.4	0.1902	193	8.53	0.209216	0.562614	0.212597	3	0.984099
P1314	1314	F733-R1083	2	BC104	This study	Desert_biocrusts	Arid	Deserts	5	Biocrusts	40.0506	108.666	1355	9.4	0.19	193	8.46	0.34881	0.800455	0.241383	4	1.44505
P1315	1315	F733-R1083	2	BC105	This study	Desert_biocrusts	Arid	Deserts	5	Biocrusts	40.05	108.668	1361	9.4	0.1819	193	8.26	0.397293	0.567635	0.224184	3.6	1.77217
P1316	1316	F733-R1083	2	BC106	This study	Desert_biocrusts	Arid	Deserts	5	Biocrusts	40.0508	108.67	1369	9.4	0.1902	193	8.04	0.514315	1.10877	0.252736	4.5	2.03499
P1317	1317	F733-R1083	2	BC107	This study	Desert_biocrusts	Arid	Deserts	5	Biocrusts	40.0525	108.67	1369	9.4	0.1902	193	8.11	0.687931	0.736638	0.229243	3.9	3.00087
P1318	1318	F733-R1083	2	BC127	This study	Desert_biocrusts	Arid	Deserts	5	Biocrusts	37.7461	107.466	1318	9.4	0.2199	193	8.56	0.409641	0.389733	0.351209	4.3	1.16637
P1319	1319	F733-R1083	2	BC128	This study	Desert_biocrusts	Arid	Deserts	5	Biocrusts	37.745	107.468	1316	9.4	0.2167	193	8.94	0.581764	0.405855	0.333961	4.9	1.74201
P1320	1320	F733-R1083	2	BC129	This study	Desert_biocrusts	Arid	Deserts	5	Biocrusts	37.7525	107.457	1324	9.4	0.2232	193	8.47	0.615028	0.48506	0.316989	5.4	1.94022
P1321	1321	F733-R1083	2	BC130	This study	Desert_biocrusts	Arid	Deserts	5	Biocrusts	37.7533	107.456	1324	9.4	0.2232	193	8.79	0.622562	0.451537	0.31116	4.3	2.00078
P1322	1322	F733-R1083	2	BC131	This study	Desert_biocrusts	Arid	Deserts	5	Biocrusts	37.7547	107.454	1324	9.4	0.2232	193	8.73	0.666722	0.452527	0.317207	4	2.10185
P1323	1323	F733-R1083	2	BC133	This study	Desert_biocrusts	Arid	Deserts	5	Biocrusts	44.6075	88.2486	550	9.4	0.0984	193	8.74	0.437856	0.577072	0.288633	3.4	1.517
P1324	1324	F733-R1083	2	BC134	This study	Desert_biocrusts	Arid	Deserts	5	Biocrusts	44.6075	88.2486	550	9.4	0.0984	193	8.8	0.289703	0.257237	0.257686	3.8	1.12425
P1325	1325	F733-R1083	2	BC135	This study	Desert_biocrusts	Arid	Deserts	5	Biocrusts	44.6075	88.2486	550	9.4	0.0984	193	8.84	0.233228	0.230003	0.295557	3.7	0.789114
P1326	1326	F733-R1083	2	BC136	This study	Desert_biocrusts	Arid	Deserts	5	Biocrusts	44.6075	88.2486	550	9.4	0.0984	193	8.77	0.196094	0.484441	0.256613	4.6	0.764161
P1327	1327	F733-R1083	2	BC137	This study	Desert_biocrusts	Arid	Deserts	5	Biocrusts	44.6086	88.25	558	9.4	0.0995	193	8.81	0.186582	1.05908	0.239777	4.2	0.778149
P1328	1328	F733-R1083	2	BC139	This study	Desert_biocrusts	Arid	Deserts	5	Biocrusts	37.5039	105.046	1263	9.4	0.1298	193	8.39	0.157238	0.216663	0.19859	3.1	0.791772
P1329	1329	F733-R1083	2	BC140	This study	Desert_biocrusts	Arid	Deserts	5	Biocrusts	37.5039	105.046	1263	9.4	0.1298	193	8.41	0.236298	0.216189	0.208854	3.6	1.13141
P1330	1330	F733-R1083	2	BC141	This study	Desert_biocrusts	Arid	Deserts	5	Biocrusts	37.5039	105.046	1263	9.4	0.1298	193	8.92	0.313734	0.589195	0.182689	3	1.71731
P1331	1331	F733-R1083	2	BC142	This study	Desert_biocrusts	Arid	Deserts	5	Biocrusts	37.5039	105.046	1263	9.4	0.1298	193	8.55	0.174796	0.216017	0.166103	3.6	1.05233
P1332	1332	F733-R1083	2	BC143	This study	Desert_biocrusts	Arid	Deserts	5	Biocrusts	37.5039	105.046	1263	9.4	0.1298	193	8.93	0.104262	0.118098	0.146782	3.6	0.710319
P1333	1333	F733-R1083	2	BC151	This study	Desert_biocrusts	Arid	Deserts	5	Biocrusts	38.7067	110.076	1165	9.4	0.265	193	8.62	0.0615723	0.0967173	0.160391	2.7	0.38389
P1334	1334	F733-R1083	2	BC152	This study	Desert_biocrusts	Arid	Deserts	5	Biocrusts	38.7067	110.076	1165	9.4	0.265	193	8.56	0.0528554	0.116517	0.175596	2.3	0.301005
P1335	1335	F733-R1083	2	BC153	This study	Desert_biocrusts	Arid	Deserts	5	Biocrusts	38.7083	110.077	1165	9.4	0.265	193	8.56	0.0528752	0.11654	0.13567	2.7	0.389733
P1336	1336	F733-R1083	2	BC154	This study	Desert_biocrusts	Arid	Deserts	5	Biocrusts	38.7075	110.076	1165	9.4	0.265	193	8.34	0.0525991	0.116955	0.140438	3.9	0.374535
P1337	1337	F733-R1083	2	BC155	This study	Desert_biocrusts	Arid	Deserts	5	Biocrusts	38.7056	110.076	1165	9.4	0.265	193	8.46	0.0967202	0.116701	0.149641	2.5	0.646349
P1338	1338	F733-R1083	2	BC169	This study	Desert_biocrusts	Arid	Deserts	5	Biocrusts	38.705	110.078	1165	7.8	0.265	397	7.23	1.46998	1.89884	0.354652	4.2	4.14485
P1339	1339	F733-R1083	2	BC170	This study	Desert_biocrusts	Arid	Deserts	5	Biocrusts	38.705	110.078	1165	7.8	0.265	397	7.29	3.30042	1.94744	0.409509	5.3	8.05947
P1340	1340	F733-R1083	2	BC171	This study	Desert_biocrusts	Arid	Deserts	5	Biocrusts	38.705	110.078	1165	7.8	0.265	397	6.99	1.64404	1.8669	0.373506	5.7	4.40164
P1341	1341	F733-R1083	2	BC172	This study	Desert_biocrusts	Arid	Deserts	5	Biocrusts	38.705	110.078	1165	7.8	0.265	397	7.09	2.17613	1.73313	0.30001	4	7.25354
P1342	1342	F733-R1083	2	BC173	This study	Desert_biocrusts	Arid	Deserts	5	Biocrusts	38.705	110.078	1165	7.8	0.265	397	7.11	2.74722	1.74621	0.349511	3.6	7.86018
P1343	1343	F733-R1083	2	BC175	This study	Desert_biocrusts	Arid	Deserts	5	Biocrusts	38.705	110.078	1165	7.8	0.265	397	7.51	1.75145	1.67238	0.376548	4.4	4.65133
P1344	1344	F733-R1083	2	BC176	This study	Desert_biocrusts	Arid	Deserts	5	Biocrusts	38.705	110.078	1165	7.8	0.265	397	7.38	1.74839	2.7822	0.404241	4.8	4.32513
P1345	1345	F733-R1083	2	BC177	This study	Desert_biocrusts	Arid	Deserts	5	Biocrusts	38.705	110.078	1165	7.8	0.265	397	7.1	2.12137	2.07893	0.312158	4.5	6.79583
P1346	1346	F733-R1083	2	BC178	This study	Desert_biocrusts	Arid	Deserts	5	Biocrusts	38.705	110.078	1165	7.8	0.265	397	7.47	2.75109	2.28687	0.3368	3.2	8.16832
P1347	1347	F733-R1083	2	BC179	This study	Desert_biocrusts	Arid	Deserts	5	Biocrusts	38.705	110.078	1165	7.8	0.265	397	7.46	1.90232	2.1424	0.306908	3.9	6.19833
P1348	1348	F733-R1083	2	BC181	This study	Desert_biocrusts	Arid	Deserts	5	Biocrusts	38.7069	110.076	1165	7.8	0.265	397	7.54	0.447572	0.609988	0.311751	4.3	1.43567
P1349	1349	F733-R1083	2	BC182	This study	Desert_biocrusts	Arid	Deserts	5	Biocrusts	38.7069	110.076	1165	7.8	0.265	397	7.38	0.589838	0.669286	0.225797	5.5	2.61225
P1350	1350	F733-R1083	2	BC183	This study	Desert_biocrusts	Arid	Deserts	5	Biocrusts	38.7081	110.078	1165	7.8	0.265	397	7.21	0.406407	0.647406	0.366627	4.9	1.1085
P1351	1351	F733-R1083	2	BC184	This study	Desert_biocrusts	Arid	Deserts	5	Biocrusts	38.7081	110.078	1165	7.8	0.265	397	7.14	0.465084	0.702422	0.204996	3.4	2.26875
P1352	1352	F733-R1083	2	BC185	This study	Desert_biocrusts	Arid	Deserts	5	Biocrusts	38.7056	110.077	1165	7.8	0.265	397	7.22	0.394336	0.608351	0.267252	3.8	1.47552
P1353	1353	F733-R1083	2	BC205	This study	Desert_biocrusts	Arid	Deserts	5	Biocrusts	40.0514	108.668	1369	7.8	0.1902	397	7.43	0.543703	0.572918	0.232212	6.2	2.34141
P1354	1354	F733-R1083	2	BC206	This study	Desert_biocrusts	Arid	Deserts	5	Biocrusts	40.0514	108.668	1369	7.8	0.1902	397	7.55	0.449995	0.740225	0.207027	5.8	2.1736
P1355	1355	F733-R1083	2	BC207	This study	Desert_biocrusts	Arid	Deserts	5	Biocrusts	40.0522	108.671	1369	7.8	0.1902	397	7.21	0.192855	0.411822	0.219627	6	0.878103
P1356	1356	F733-R1083	2	BC208	This study	Desert_biocrusts	Arid	Deserts	5	Biocrusts	40.0506	108.666	1355	7.8	0.19	397	7.32	0.107453	0.27241	0.213381	3.8	0.503575
P1357	1357	F733-R1083	2	BC209	This study	Desert_biocrusts	Arid	Deserts	5	Biocrusts	40.0517	108.67	1369	7.8	0.1902	397	7.2	0.451374	0.291322	0.221868	3.3	2.03442
P1358	1358	F733-R1083	2	BC211	This study	Desert_biocrusts	Arid	Deserts	5	Biocrusts	40.0514	108.669	1369	7.8	0.1902	397	7.41	0.261493	0.56278	0.377753	4.4	0.692233
P1359	1359	F733-R1083	2	BC212	This study	Desert_biocrusts	Arid	Deserts	5	Biocrusts	40.0514	108.669	1369	7.8	0.1902	397	7.4	0.382189	0.372046	0.250199	4.1	1.52754
P1360	1360	F733-R1083	2	BC213	This study	Desert_biocrusts	Arid	Deserts	5	Biocrusts	40.0514	108.668	1369	7.8	0.1902	397	7.27	0.279687	0.290722	0.149865	3.9	1.86626
P1361	1361	F733-R1083	2	BC214	This study	Desert_biocrusts	Arid	Deserts	5	Biocrusts	40.0503	108.666	1355	7.8	0.19	397	7.54	0.295093	0.43255	0.330809	3.3	0.892034
P1362	1362	F733-R1083	2	BC215	This study	Desert_biocrusts	Arid	Deserts	5	Biocrusts	40.0514	108.67	1369	7.8	0.1902	397	7.59	0.277128	0.333744	0.201738	3.9	1.3737
P1363	1363	F733-R1083	2	BC217	This study	Desert_biocrusts	Arid	Deserts	5	Biocrusts	40.0514	108.669	1369	7.8	0.1902	397	7.41	0.208107	0.276029	0.221	4.3	0.941662
P1364	1364	F733-R1083	2	BC218	This study	Desert_biocrusts	Arid	Deserts	5	Biocrusts	40.0514	108.669	1369	7.8	0.1902	397	7.38	0.3122	0.36865	0.252	5.1	1.23889
P1365	1365	F733-R1083	2	BC219	This study	Desert_biocrusts	Arid	Deserts	5	Biocrusts	40.0514	108.669	1369	7.8	0.1902	397	7.24	0.190006	0.293189	0.174396	6.1	1.08951
P1366	1366	F733-R1083	2	BC220	This study	Desert_biocrusts	Arid	Deserts	5	Biocrusts	40.0506	108.666	1355	7.8	0.19	397	7.24	0.225084	0.298708	0.174477	4.1	1.29005
P1367	1367	F733-R1083	2	BC221	This study	Desert_biocrusts	Arid	Deserts	5	Biocrusts	40.0514	108.67	1369	7.8	0.1902	397	7.35	0.0952042	0.192127	0.181963	4.2	0.523207
P1368	1368	F733-R1083	2	BC229	This study	Desert_biocrusts	Arid	Deserts	5	Biocrusts	40.0514	108.668	1369	7.8	0.1902	397	7.47	0.0609256	0.0981308	0.117506	3.3	0.518487
P1369	1369	F733-R1083	2	BC230	This study	Desert_biocrusts	Arid	Deserts	5	Biocrusts	40.0514	108.668	1369	7.8	0.1902	397	7.53	0.0871343	0.0788181	0.143098	2.8	0.608912
P1370	1370	F733-R1083	2	BC231	This study	Desert_biocrusts	Arid	Deserts	5	Biocrusts	40.0522	108.671	1369	7.8	0.1902	397	7.35	0.0260719	0.134043	0.198177	3	0.131559
P1371	1371	F733-R1083	2	BC232	This study	Desert_biocrusts	Arid	Deserts	5	Biocrusts	40.0506	108.666	1355	7.8	0.19	397	7.27	0.113204	0.114647	0.188285	3.5	0.601239
P1372	1372	F733-R1083	2	BC233	This study	Desert_biocrusts	Arid	Deserts	5	Biocrusts	40.0517	108.67	1369	7.8	0.1902	397	7.23	0.29585	0.0970215	0.157433	3.1	1.87921
P1373	1373	F733-R1083	2	BC247	This study	Desert_biocrusts	Arid	Deserts	5	Biocrusts	37.5039	105.046	1263	7	0.1298	259	7.44	1.96387	3.12248	0.365672	6.6	5.37057
P1374	1374	F733-R1083	2	BC248	This study	Desert_biocrusts	Arid	Deserts	5	Biocrusts	37.5039	105.046	1263	7	0.1298	259	7.31	2.00168	1.67238	0.324469	6.5	6.1691
P1375	1375	F733-R1083	2	BC249	This study	Desert_biocrusts	Arid	Deserts	5	Biocrusts	37.5039	105.046	1263	7	0.1298	259	7.28	1.78118	2.05447	0.384155	6.7	4.63663
P1376	1376	F733-R1083	2	BC250	This study	Desert_biocrusts	Arid	Deserts	5	Biocrusts	37.5039	105.046	1263	7	0.1298	259	7.19	2.68582	2.81747	0.345652	5.6	7.77031
P1377	1377	F733-R1083	2	BC251	This study	Desert_biocrusts	Arid	Deserts	5	Biocrusts	37.5039	105.046	1263	7	0.1298	259	7.09	1.47989	2.33088	0.381474	5.6	3.87939
P1378	1378	F733-R1083	2	BC253	This study	Desert_biocrusts	Arid	Deserts	5	Biocrusts	37.5039	105.046	1263	7	0.1298	259	6.99	0.452929	0.923083	0.321137	4.3	1.41039
P1379	1379	F733-R1083	2	BC254	This study	Desert_biocrusts	Arid	Deserts	5	Biocrusts	37.5039	105.046	1263	7	0.1298	259	6.93	0.382823	0.636516	0.209325	3.6	1.82884
P1380	1380	F733-R1083	2	BC255	This study	Desert_biocrusts	Arid	Deserts	5	Biocrusts	37.5039	105.046	1263	7	0.1298	259	7.36	0.871989	1.34804	0.221935	4.2	3.92904
P1381	1381	F733-R1083	2	BC256	This study	Desert_biocrusts	Arid	Deserts	5	Biocrusts	37.5039	105.046	1263	7	0.1298	259	7.45	0.315555	2.90084	0.374838	6.9	0.841844
P1382	1382	F733-R1083	2	BC257	This study	Desert_biocrusts	Arid	Deserts	5	Biocrusts	37.5039	105.046	1263	7	0.1298	259	7.25	0.923395	1.93565	0.192403	4.9	4.79927
P1383	1383	F733-R1083	2	BC259	This study	Desert_biocrusts	Arid	Deserts	5	Biocrusts	37.5039	105.046	1263	7	0.1298	259	7.47	0.386897	1.57492	0.243563	7.6	1.58849
P1384	1384	F733-R1083	2	BC260	This study	Desert_biocrusts	Arid	Deserts	5	Biocrusts	37.5039	105.046	1263	7	0.1298	259	7.68	0.573911	3.13849	0.229691	9.9	2.49862
P1385	1385	F733-R1083	2	BC261	This study	Desert_biocrusts	Arid	Deserts	5	Biocrusts	37.5039	105.046	1263	7	0.1298	259	7.98	0.198914	0.90848	0.272075	6	0.731099
P1386	1386	F733-R1083	2	BC262	This study	Desert_biocrusts	Arid	Deserts	5	Biocrusts	37.5039	105.046	1263	7	0.1298	259	8.02	0.304676	0.91786	0.227363	4.3	1.34004
P1387	1387	F733-R1083	2	BC263	This study	Desert_biocrusts	Arid	Deserts	5	Biocrusts	37.5039	105.046	1263	7	0.1298	259	7.95	0.199311	0.517398	0.233668	5.2	0.852965
P1388	1388	F733-R1083	2	BC283	This study	Desert_biocrusts	Arid	Deserts	5	Biocrusts	37.5039	105.046	1263	7	0.1298	259	7.98	0.215131	0.329526	0.250967	5.9	0.857206
P1389	1389	F733-R1083	2	BC284	This study	Desert_biocrusts	Arid	Deserts	5	Biocrusts	37.5039	105.046	1263	7	0.1298	259	7.82	0.476266	0.501248	0.288989	8.7	1.64805
P1390	1390	F733-R1083	2	BC285	This study	Desert_biocrusts	Arid	Deserts	5	Biocrusts	37.5039	105.046	1263	7	0.1298	259	7.97	0.139878	0.282727	0.25728	6.8	0.543679
P1391	1391	F733-R1083	2	BC286	This study	Desert_biocrusts	Arid	Deserts	5	Biocrusts	37.5039	105.046	1263	7	0.1298	259	8.08	0.17242	0.212024	0.192958	6.8	0.893563
P1392	1392	F733-R1083	2	BC287	This study	Desert_biocrusts	Arid	Deserts	5	Biocrusts	37.5039	105.046	1263	7	0.1298	259	8.07	0.215328	0.353409	0.267555	6.2	0.804797
P1393	1393	F733-R1083	2	BC289	This study	Desert_biocrusts	Arid	Deserts	5	Biocrusts	37.5039	105.046	1263	7	0.1298	259	8.06	0.111286	0.21232	0.189243	4.2	0.588061
P1394	1394	F733-R1083	2	BC290	This study	Desert_biocrusts	Arid	Deserts	5	Biocrusts	37.5039	105.046	1263	7	0.1298	259	8.25	0.0927387	0.142883	0.214678	4.1	0.43199
P1395	1395	F733-R1083	2	BC291	This study	Desert_biocrusts	Arid	Deserts	5	Biocrusts	37.5039	105.046	1263	7	0.1298	259	8.08	0.139164	0.209382	0.255821	5.6	0.543988
P1396	1396	F733-R1083	2	BC292	This study	Desert_biocrusts	Arid	Deserts	5	Biocrusts	37.5039	105.046	1263	7	0.1298	259	8.02	0.120737	0.152618	0.252168	5.5	0.478795
P1397	1397	F733-R1083	2	BC293	This study	Desert_biocrusts	Arid	Deserts	5	Biocrusts	37.5039	105.046	1263	7	0.1298	259	8.26	0.0926525	0.212362	0.123518	3	0.750112
P1398	1398	F733-R1083	2	BC295	This study	Desert_biocrusts	Arid	Deserts	5	Biocrusts	38.7067	110.076	1165	7	0.265	259	8.02	0.190695	0.356027	0.217759	8.3	0.875719
P1399	1399	F733-R1083	2	BC296	This study	Desert_biocrusts	Arid	Deserts	5	Biocrusts	38.7067	110.076	1165	7	0.265	259	7.9	0.17416	0.281552	0.167765	8	1.03812
P1400	1400	F733-R1083	2	BC297	This study	Desert_biocrusts	Arid	Deserts	5	Biocrusts	38.7078	110.077	1165	7	0.265	259	8.21	0.31088	0.355174	0.24716	6.6	1.25781
P1401	1401	F733-R1083	2	BC298	This study	Desert_biocrusts	Arid	Deserts	5	Biocrusts	38.7078	110.077	1165	7	0.265	259	8.06	0.18074	0.211625	0.237859	6.1	0.759859
P1402	1402	F733-R1083	2	BC299	This study	Desert_biocrusts	Arid	Deserts	5	Biocrusts	38.7064	110.077	1165	7	0.265	259	7.99	0.103627	0.211101	0.198761	6.8	0.521362
P1403	1403	F733-R1083	2	BC307	This study	Desert_biocrusts	Arid	Deserts	5	Biocrusts	38.7067	110.076	1165	7	0.265	259	8.24	0.103293	0.1375	0.191197	4.4	0.540242
P1404	1404	F733-R1083	2	BC308	This study	Desert_biocrusts	Arid	Deserts	5	Biocrusts	38.7067	110.076	1165	7	0.265	259	8.49	0.0866789	0.0433328	0.180717	4.6	0.479639
P1405	1405	F733-R1083	2	BC309	This study	Desert_biocrusts	Arid	Deserts	5	Biocrusts	38.7078	110.077	1165	7	0.265	259	8.21	0.303111	0.109123	0.114553	3.9	2.64603
P1406	1406	F733-R1083	2	BC310	This study	Desert_biocrusts	Arid	Deserts	5	Biocrusts	38.7078	110.077	1165	7	0.265	259	8.69	0.0603363	0.0275246	0.13598	2.6	0.443714
P1407	1407	F733-R1083	2	BC311	This study	Desert_biocrusts	Arid	Deserts	5	Biocrusts	38.7064	110.077	1165	7	0.265	259	8.28	0.189418	0.110615	0.17715	5.1	1.06926
P1408	1408	F733-R1083	2	BC325	This study	Desert_biocrusts	Arid	Deserts	5	Biocrusts	40.0514	108.669	1369	8.5	0.1902	312	7.59	1.38063	1.41023	0.476857	6.8	2.89527
P1409	1409	F733-R1083	2	BC326	This study	Desert_biocrusts	Arid	Deserts	5	Biocrusts	40.0514	108.669	1369	8.5	0.1902	312	7.58	1.05287	1.51438	0.486153	6	2.16572
P1410	1410	F733-R1083	2	BC327	This study	Desert_biocrusts	Arid	Deserts	5	Biocrusts	40.0511	108.667	1369	8.5	0.1902	312	7.75	1.19257	1.32756	0.362839	5.2	3.28678
P1411	1411	F733-R1083	2	BC328	This study	Desert_biocrusts	Arid	Deserts	5	Biocrusts	40.0511	108.667	1369	8.5	0.1902	312	7.41	1.61572	1.34058	0.544238	7	2.96878
P1412	1412	F733-R1083	2	BC329	This study	Desert_biocrusts	Arid	Deserts	5	Biocrusts	40.0536	108.671	1369	8.5	0.1902	312	7.88	1.79322	1.228	0.4516	6.2	3.97082
P1413	1413	F733-R1083	2	BC331	This study	Desert_biocrusts	Arid	Deserts	5	Biocrusts	37.7456	107.467	1316	8.5	0.2167	312	8.05	1.03524	0.975652	0.483183	5.4	2.14253
P1414	1414	F733-R1083	2	BC332	This study	Desert_biocrusts	Arid	Deserts	5	Biocrusts	37.745	107.468	1316	8.5	0.2167	312	7.59	1.09079	1.18473	0.339	7	3.21768
P1415	1415	F733-R1083	2	BC333	This study	Desert_biocrusts	Arid	Deserts	5	Biocrusts	37.7508	107.459	1316	8.5	0.212	312	7.49	1.75065	1.86929	0.519688	5.7	3.36866
P1416	1416	F733-R1083	2	BC334	This study	Desert_biocrusts	Arid	Deserts	5	Biocrusts	37.7503	107.461	1316	8.5	0.212	312	7.82	0.968386	1.54301	0.542458	4.4	1.78518
P1417	1417	F733-R1083	2	BC335	This study	Desert_biocrusts	Arid	Deserts	5	Biocrusts	37.7539	107.455	1324	8.5	0.2232	312	7.92	1.39341	1.36042	0.522804	5.9	2.66527
P1418	1418	F733-R1083	2	BC337	This study	Desert_biocrusts	Arid	Deserts	5	Biocrusts	37.7456	107.467	1316	8.5	0.2167	312	8.18	1.08538	0.354162	0.473496	6.6	2.29227
P1419	1419	F733-R1083	2	BC338	This study	Desert_biocrusts	Arid	Deserts	5	Biocrusts	37.7456	107.467	1316	8.5	0.2167	312	8.05	0.305469	0.326598	0.24216	7.8	1.26144
P1420	1420	F733-R1083	2	BC339	This study	Desert_biocrusts	Arid	Deserts	5	Biocrusts	37.7508	107.459	1316	8.5	0.212	312	7.97	0.52055	0.463728	0.271852	17.8	1.91483
P1421	1421	F733-R1083	2	BC340	This study	Desert_biocrusts	Arid	Deserts	5	Biocrusts	37.7503	107.461	1316	8.5	0.212	312	8.03	0.473175	0.465744	0.228333	11.1	2.0723
P1422	1422	F733-R1083	2	BC341	This study	Desert_biocrusts	Arid	Deserts	5	Biocrusts	37.7539	107.455	1324	8.5	0.2232	312	8.01	0.346745	0.535506	0.261666	11.5	1.32514
P1423	1423	F733-R1083	2	BC361	This study	Desert_biocrusts	Arid	Deserts	5	Biocrusts	37.745	107.467	1316	8.5	0.2167	312	8.08	0.448141	0.281937	0.407939	5.5	1.09855
P1424	1424	F733-R1083	2	BC362	This study	Desert_biocrusts	Arid	Deserts	5	Biocrusts	37.7453	107.467	1316	8.5	0.2167	312	8.33	0.43774	0.307232	0.458159	6	0.955432
P1425	1425	F733-R1083	2	BC363	This study	Desert_biocrusts	Arid	Deserts	5	Biocrusts	37.7508	107.46	1316	8.5	0.212	312	8.55	0.254781	0.260991	0.232859	5.9	1.09414
P1426	1426	F733-R1083	2	BC364	This study	Desert_biocrusts	Arid	Deserts	5	Biocrusts	37.7506	107.46	1316	8.5	0.212	312	8.29	0.365846	0.234868	0.46382	7	0.788767
P1427	1427	F733-R1083	2	BC365	This study	Desert_biocrusts	Arid	Deserts	5	Biocrusts	37.7539	107.455	1324	8.5	0.2232	312	8.39	0.573433	0.702146	0.453501	15.4	1.26446
P1428	1428	F733-R1083	2	BC367	This study	Desert_biocrusts	Arid	Deserts	5	Biocrusts	37.7456	107.467	1316	8.5	0.2167	312	8.12	0.414188	0.343886	0.428842	7.1	0.965829
P1429	1429	F733-R1083	2	BC368	This study	Desert_biocrusts	Arid	Deserts	5	Biocrusts	37.745	107.468	1316	8.5	0.2167	312	8.25	0.156534	0.12526	0.270055	9.5	0.579637
P1430	1430	F733-R1083	2	BC369	This study	Desert_biocrusts	Arid	Deserts	5	Biocrusts	37.7508	107.459	1316	8.5	0.212	312	8.11	0.285444	0.470534	0.325373	8.4	0.877281
P1431	1431	F733-R1083	2	BC370	This study	Desert_biocrusts	Arid	Deserts	5	Biocrusts	37.7503	107.461	1316	8.5	0.212	312	8.16	0.266566	0.401018	0.505192	5.3	0.527653
P1432	1432	F733-R1083	2	BC371	This study	Desert_biocrusts	Arid	Deserts	5	Biocrusts	37.7539	107.455	1324	8.5	0.2232	312	8.17	0.217007	0.469643	0.39206	5.9	0.553505
P1433	1433	F733-R1083	2	BC373	This study	Desert_biocrusts	Arid	Deserts	5	Biocrusts	37.7456	107.467	1316	8.5	0.2167	312	8.21	0.344017	0.326932	0.452875	6.8	0.759628
P1434	1434	F733-R1083	2	BC374	This study	Desert_biocrusts	Arid	Deserts	5	Biocrusts	37.7456	107.467	1316	8.5	0.2167	312	8.25	0.106701	0.178661	0.208789	8.1	0.511048
P1435	1435	F733-R1083	2	BC375	This study	Desert_biocrusts	Arid	Deserts	5	Biocrusts	37.7508	107.459	1316	8.5	0.212	312	8.26	0.23876	0.246254	0.255209	15.8	0.935547
P1436	1436	F733-R1083	2	BC376	This study	Desert_biocrusts	Arid	Deserts	5	Biocrusts	37.7503	107.461	1316	8.5	0.212	312	8.21	0.25651	0.253511	0.221226	10.8	1.15949
P1437	1437	F733-R1083	2	BC377	This study	Desert_biocrusts	Arid	Deserts	5	Biocrusts	37.7539	107.455	1324	8.5	0.2232	312	8.29	0.070894	0.247623	0.258809	10.1	0.273924
P1438	1438	F733-R1083	2	BC385	This study	Desert_biocrusts	Arid	Deserts	5	Biocrusts	37.745	107.467	1316	8.5	0.2167	312	8.22	0.174658	0.177203	0.197538	6.8	0.884174
P1439	1439	F733-R1083	2	BC386	This study	Desert_biocrusts	Arid	Deserts	5	Biocrusts	37.7453	107.467	1316	8.5	0.2167	312	8.25	0.425524	0.524825	0.254448	12.3	1.67234
P1440	1440	F733-R1083	2	BC387	This study	Desert_biocrusts	Arid	Deserts	5	Biocrusts	37.7508	107.46	1316	8.5	0.212	312	8.33	0.30931	0.278873	0.201376	7.3	1.53599
P1441	1441	F733-R1083	2	BC388	This study	Desert_biocrusts	Arid	Deserts	5	Biocrusts	37.7506	107.46	1316	8.5	0.212	312	8.32	0.41593	0.138282	0.223769	7.6	1.85875
P1442	1442	F733-R1083	2	BC389	This study	Desert_biocrusts	Arid	Deserts	5	Biocrusts	37.7539	107.455	1324	8.5	0.2232	312	8.31	0.0882864	0.109815	0.160327	6.9	0.550666
P1443	1443	F733-R1083	2	BC1	This study	Desert_biocrusts	Arid	Deserts	5	Biocrusts	37.5039	105.046	1263	7.2	0.1298	164	7.85	0.969117	1.20843	0.388707	8.2	2.49318
P1444	1444	F733-R1083	2	BC2	This study	Desert_biocrusts	Arid	Deserts	5	Biocrusts	37.5039	105.046	1263	7.2	0.1298	164	7.88	2.68764	0.958624	0.361613	9.8	7.43235
P1445	1445	F733-R1083	2	BC3	This study	Desert_biocrusts	Arid	Deserts	5	Biocrusts	37.5039	105.046	1263	7.2	0.1298	164	7.75	1.54218	1.34377	0.427861	9.2	3.60439
P1446	1446	F733-R1083	2	BC4	This study	Desert_biocrusts	Arid	Deserts	5	Biocrusts	37.5039	105.046	1263	7.2	0.1298	164	7.85	1.52792	1.31273	0.378164	8.3	4.04038
P1447	1447	F733-R1083	2	BC5	This study	Desert_biocrusts	Arid	Deserts	5	Biocrusts	37.5039	105.046	1263	7.2	0.1298	164	7.85	2.30894	2.12671	0.356042	7.2	6.48503
P1448	1448	F733-R1083	2	BC79	This study	Desert_biocrusts	Arid	Deserts	5	Biocrusts	40.0514	108.669	1369	9.4	0.1902	193	7.54	3.41771	2.66453	0.316155	10.3	10.8102
P1449	1449	F733-R1083	2	BC80	This study	Desert_biocrusts	Arid	Deserts	5	Biocrusts	40.0506	108.666	1355	9.4	0.19	193	7.64	2.53851	1.77386	0.35878	8.8	7.07539
P1450	1450	F733-R1083	2	BC81	This study	Desert_biocrusts	Arid	Deserts	5	Biocrusts	40.05	108.668	1361	9.4	0.1819	193	8.11	2.65457	2.32658	0.351804	7	7.54559
P1451	1451	F733-R1083	2	BC82	This study	Desert_biocrusts	Arid	Deserts	5	Biocrusts	40.0508	108.67	1369	9.4	0.1902	193	7.93	3.62299	3.14019	0.351819	7.7	10.2979
P1452	1452	F733-R1083	2	BC83	This study	Desert_biocrusts	Arid	Deserts	5	Biocrusts	40.0525	108.67	1369	9.4	0.1902	193	8.32	2.83711	3.4238	0.329137	5.6	8.61985
P1453	1453	F733-R1083	2	BC157	This study	Desert_biocrusts	Arid	Deserts	5	Biocrusts	40.0514	108.669	1369	7.8	0.1902	397	7.46	2.92434	2.1247	0.28383	7.3	10.3031
P1454	1454	F733-R1083	2	BC158	This study	Desert_biocrusts	Arid	Deserts	5	Biocrusts	40.0514	108.669	1369	7.8	0.1902	397	7.6	3.18579	1.9632	0.425426	5.4	7.48847
P1455	1455	F733-R1083	2	BC159	This study	Desert_biocrusts	Arid	Deserts	5	Biocrusts	40.0514	108.668	1369	7.8	0.1902	397	7.13	3.27413	1.26034	0.369264	8	8.86662
P1456	1456	F733-R1083	2	BC160	This study	Desert_biocrusts	Arid	Deserts	5	Biocrusts	40.0503	108.666	1355	7.8	0.19	397	7.34	2.61491	2.50195	0.37148	5.7	7.03916
P1457	1457	F733-R1083	2	BC161	This study	Desert_biocrusts	Arid	Deserts	5	Biocrusts	40.0514	108.67	1369	7.8	0.1902	397	7.27	2.18741	2.11176	0.295586	5.1	7.40024
P1458	1458	F733-R1083	2	BC235	This study	Desert_biocrusts	Arid	Deserts	5	Biocrusts	38.7067	110.076	1165	7	0.265	259	7.33	29.8492	2.96951	0.312656	10.6	95.4697
P1459	1459	F733-R1083	2	BC236	This study	Desert_biocrusts	Arid	Deserts	5	Biocrusts	38.7067	110.076	1165	7	0.265	259	7.54	15.3086	2.41762	0.325707	6.8	47.001
P1460	1460	F733-R1083	2	BC237	This study	Desert_biocrusts	Arid	Deserts	5	Biocrusts	38.7078	110.077	1165	7	0.265	259	7.34	40.03	2.75129	0.359734	14.9	111.277
P1461	1461	F733-R1083	2	BC238	This study	Desert_biocrusts	Arid	Deserts	5	Biocrusts	38.7078	110.077	1165	7	0.265	259	7.58	17.0413	3.14767	0.409037	8	41.662
P1462	1462	F733-R1083	2	BC239	This study	Desert_biocrusts	Arid	Deserts	5	Biocrusts	38.705	110.078	1165	7	0.265	259	7.47	31.757	2.8968	0.474431	7.2	66.9371
P1463	1463	F733-R1083	2	BC313	This study	Desert_biocrusts	Arid	Deserts	5	Biocrusts	37.7464	107.466	1318	8.5	0.2199	312	7.53	11.2499	1.96714	0.442981	7	25.396
P1464	1464	F733-R1083	2	BC314	This study	Desert_biocrusts	Arid	Deserts	5	Biocrusts	37.7464	107.466	1318	8.5	0.2199	312	7.72	13.5269	1.51513	0.462243	8.6	29.2636
P1465	1465	F733-R1083	2	BC315	This study	Desert_biocrusts	Arid	Deserts	5	Biocrusts	37.7536	107.456	1324	8.5	0.2232	312	7.27	12.9374	2.42645	0.470039	7.7	27.5242
P1466	1466	F733-R1083	2	BC316	This study	Desert_biocrusts	Arid	Deserts	5	Biocrusts	37.7536	107.456	1324	8.5	0.2232	312	7.48	9.04052	1.98411	0.462307	6.9	19.5553
P1467	1467	F733-R1083	2	BC317	This study	Desert_biocrusts	Arid	Deserts	5	Biocrusts	37.7567	107.451	1324	8.5	0.2232	312	7.68	12.0928	1.54045	0.444245	6.8	27.221
P1468	1468	F733-R1083	2	BC7	This study	Desert_biocrusts	Arid	Deserts	5	Biocrusts	37.5039	105.046	1263	7.2	0.1298	164	8.44	5.63509	1.35625	0.387512	4.6	14.5417
P1469	1469	F733-R1083	2	BC8	This study	Desert_biocrusts	Arid	Deserts	5	Biocrusts	37.5039	105.046	1263	7.2	0.1298	164	8.28	6.56334	0.65571	0.304594	4.4	21.5479
P1470	1470	F733-R1083	2	BC9	This study	Desert_biocrusts	Arid	Deserts	5	Biocrusts	37.5039	105.046	1263	7.2	0.1298	164	8.01	5.15691	1.51418	0.371072	5.7	13.8973
P1471	1471	F733-R1083	2	BC10	This study	Desert_biocrusts	Arid	Deserts	5	Biocrusts	37.5039	105.046	1263	7.2	0.1298	164	8.2	5.32118	0.660309	0.298597	4.1	17.8206
P1472	1472	F733-R1083	2	BC11	This study	Desert_biocrusts	Arid	Deserts	5	Biocrusts	37.5039	105.046	1263	7.2	0.1298	164	8.18	4.05075	2.04928	0.311102	5.2	13.0206
P1473	1473	F733-R1083	2	BC85	This study	Desert_biocrusts	Arid	Deserts	5	Biocrusts	37.7461	107.466	1318	9.4	0.2199	193	8.21	3.90917	1.71601	0.304322	5.6	12.8455
P1474	1474	F733-R1083	2	BC86	This study	Desert_biocrusts	Arid	Deserts	5	Biocrusts	37.745	107.468	1316	9.4	0.2167	193	8.36	2.75666	1.71549	0.332369	5.5	8.294
P1475	1475	F733-R1083	2	BC87	This study	Desert_biocrusts	Arid	Deserts	5	Biocrusts	37.7525	107.457	1324	9.4	0.2232	193	8.47	3.5231	1.41337	0.303363	5	11.6135
P1476	1476	F733-R1083	2	BC88	This study	Desert_biocrusts	Arid	Deserts	5	Biocrusts	37.7533	107.456	1324	9.4	0.2232	193	8.64	3.83767	0.906408	0.289523	5.1	13.2551
P1477	1477	F733-R1083	2	BC89	This study	Desert_biocrusts	Arid	Deserts	5	Biocrusts	37.7547	107.454	1324	9.4	0.2232	193	8.13	3.72535	2.69561	0.310899	5.5	11.9825
P1478	1478	F733-R1083	2	BC163	This study	Desert_biocrusts	Arid	Deserts	5	Biocrusts	40.0514	108.669	1369	7.8	0.1902	397	8.28	1.60796	2.55679	0.459128	5.6	3.50221
P1479	1479	F733-R1083	2	BC164	This study	Desert_biocrusts	Arid	Deserts	5	Biocrusts	40.0514	108.669	1369	7.8	0.1902	397	7.91	1.81154	1.67088	0.302486	5	5.98883
P1480	1480	F733-R1083	2	BC165	This study	Desert_biocrusts	Arid	Deserts	5	Biocrusts	40.0514	108.669	1369	7.8	0.1902	397	7.63	1.20804	2.58782	0.345887	4.9	3.49257
P1481	1481	F733-R1083	2	BC166	This study	Desert_biocrusts	Arid	Deserts	5	Biocrusts	40.0506	108.666	1355	7.8	0.19	397	7.42	4.64372	1.56822	0.413628	5.6	11.2268
P1482	1482	F733-R1083	2	BC167	This study	Desert_biocrusts	Arid	Deserts	5	Biocrusts	40.0514	108.67	1369	7.8	0.1902	397	7.89	5.85109	2.3493	0.374214	6.1	15.6357
P1483	1483	F733-R1083	2	BC241	This study	Desert_biocrusts	Arid	Deserts	5	Biocrusts	38.705	110.078	1165	7	0.265	259	7.09	2.46228	1.33715	0.293913	6.3	8.37758
P1484	1484	F733-R1083	2	BC242	This study	Desert_biocrusts	Arid	Deserts	5	Biocrusts	38.705	110.078	1165	7	0.265	259	7.04	2.11527	2.04312	0.358673	7.9	5.89749
P1485	1485	F733-R1083	2	BC243	This study	Desert_biocrusts	Arid	Deserts	5	Biocrusts	38.705	110.078	1165	7	0.265	259	7.25	1.05632	2.37794	0.301853	6.8	3.49944
P1486	1486	F733-R1083	2	BC244	This study	Desert_biocrusts	Arid	Deserts	5	Biocrusts	38.705	110.078	1165	7	0.265	259	7.26	1.75921	2.6702	0.389869	7.9	4.5123
P1487	1487	F733-R1083	2	BC245	This study	Desert_biocrusts	Arid	Deserts	5	Biocrusts	38.705	110.078	1165	7	0.265	259	7.22	1.58289	2.18046	0.39845	5.7	3.97263
P1488	1488	F733-R1083	2	BC319	This study	Desert_biocrusts	Arid	Deserts	5	Biocrusts	44.6075	88.2486	550	8.5	0.0984	312	7.77	2.41409	0.936486	0.266467	6.8	9.05961
P1489	1489	F733-R1083	2	BC320	This study	Desert_biocrusts	Arid	Deserts	5	Biocrusts	44.6075	88.2486	550	8.5	0.0984	312	7.59	0.689567	0.974799	0.299461	7.5	2.30269
P1490	1490	F733-R1083	2	BC321	This study	Desert_biocrusts	Arid	Deserts	5	Biocrusts	44.6075	88.2486	550	8.5	0.0984	312	7.75	1.37948	0.773241	0.451977	8.3	3.0521
P1491	1491	F733-R1083	2	BC322	This study	Desert_biocrusts	Arid	Deserts	5	Biocrusts	44.6075	88.2486	550	8.5	0.0984	312	8.09	1.65576	1.07521	0.41567	5.5	3.98335
P1492	1492	F733-R1083	2	BC323	This study	Desert_biocrusts	Arid	Deserts	5	Biocrusts	44.6086	88.25	558	8.5	0.0995	312	7.77	1.21821	0.962813	0.317366	7.5	3.8385
P1493	1493	F733-R1083	2	grassphod1	Xu_2022_SBB	Grasslands	Cold	Cold_Grasslands	3	unknown	36.2916	113.357	832	11.8458	0.4256	563.875	8.05	17.7323	1.2243	0.62898	2.49512	28.1921
P1494	1494	F733-R1083	2	grassphod2	Xu_2022_SBB	Grasslands	Cold	Cold_Grasslands	3	unknown	36.2916	113.357	832	11.8458	0.4256	563.875	8.07	20.1187	1.15418	0.624146	2.87988	32.234
P1495	1495	F733-R1083	2	grassphod3	Xu_2022_SBB	Grasslands	Cold	Cold_Grasslands	3	unknown	36.2916	113.357	832	11.8458	0.4256	563.875	8.11	24.8469	1.22396	0.715214	4.60878	34.7406
P1496	1496	F733-R1083	2	grassphod4	Xu_2022_SBB	Grasslands	Cold	Cold_Grasslands	3	unknown	36.2916	113.357	832	11.8458	0.4256	563.875	8.1	40.2641	1.19457	0.619155	3.16744	65.0308
P1497	1497	F733-R1083	2	grassphod5	Xu_2022_SBB	Grasslands	Cold	Cold_Grasslands	3	unknown	36.2916	113.357	832	11.8458	0.4256	563.875	8.06	37.8227	1.32308	0.65573	4.7599	57.6803
P1498	1498	F733-R1083	2	grassphod6	Xu_2022_SBB	Grasslands	Arid	Arid_Grasslands	2	unknown	35.9932	112.294	927	9.96021	0.3983	591.183	7.97	25.6301	1.61923	0.370356	3.90602	69.2038
P1499	1499	F733-R1083	2	grassphod7	Xu_2022_SBB	Grasslands	Arid	Arid_Grasslands	2	unknown	35.9932	112.294	927	9.96021	0.3983	591.183	7.93	14.4972	1.71751	0.426955	2.85595	33.9549
P1500	1500	F733-R1083	2	grassphod8	Xu_2022_SBB	Grasslands	Arid	Arid_Grasslands	2	unknown	35.9932	112.294	927	9.96021	0.3983	591.183	8.05	5.08429	1.62246	0.375888	3.73833	13.5261
P1501	1501	F733-R1083	2	grassphod9	Xu_2022_SBB	Grasslands	Arid	Arid_Grasslands	2	unknown	35.9932	112.294	927	9.96021	0.3983	591.183	7.97	14.3476	1.15884	0.397409	2.18914	36.1027
P1502	1502	F733-R1083	2	grassphod10	Xu_2022_SBB	Grasslands	Arid	Arid_Grasslands	2	unknown	35.9932	112.294	927	9.96021	0.3983	591.183	7.86	15.3974	1.61712	0.433868	2.48988	35.4887
P1503	1503	F733-R1083	2	grassphod11	Xu_2022_SBB	Grasslands	Arid	Arid_Grasslands	2	unknown	35.9854	111.635	800	10.6581	0.3641	566.122	8.16	2.09216	1.76757	0.532232	4.36762	3.93092
P1504	1504	F733-R1083	2	grassphod12	Xu_2022_SBB	Grasslands	Arid	Arid_Grasslands	2	unknown	35.9854	111.635	800	10.6581	0.3641	566.122	8.14	3.4881	1.19416	0.605935	4.66052	5.75655
P1505	1505	F733-R1083	2	grassphod13	Xu_2022_SBB	Grasslands	Arid	Arid_Grasslands	2	unknown	35.9854	111.635	800	10.6581	0.3641	566.122	8.13	3.97293	1.39952	0.477731	2.93619	8.31625
P1506	1506	F733-R1083	2	grassphod14	Xu_2022_SBB	Grasslands	Arid	Arid_Grasslands	2	unknown	35.9854	111.635	800	10.6581	0.3641	566.122	8.06	5.14315	1.49839	0.492991	2.79406	10.4326
P1507	1507	F733-R1083	2	grassphod15	Xu_2022_SBB	Grasslands	Arid	Arid_Grasslands	2	unknown	35.9854	111.635	800	10.6581	0.3641	566.122	8.02	6.87931	1.64666	0.499849	3.61485	13.7628
P1508	1508	F733-R1083	2	grassphod16	Xu_2022_SBB	Grasslands	Arid	Arid_Grasslands	2	unknown	36.0728	110.181	922	10.7233	0.3676	533.362	8	4.09641	1.21837	0.533684	1.52632	7.67572
P1509	1509	F733-R1083	2	grassphod17	Xu_2022_SBB	Grasslands	Arid	Arid_Grasslands	2	unknown	36.0728	110.181	922	10.7233	0.3676	533.362	8.03	5.81764	1.0754	0.51744	2.10155	11.2431
P1510	1510	F733-R1083	2	grassphod18	Xu_2022_SBB	Grasslands	Arid	Arid_Grasslands	2	unknown	36.0728	110.181	922	10.7233	0.3676	533.362	8.05	6.15028	1.29518	0.542869	2.26836	11.3292
P1511	1511	F733-R1083	2	grassphod19	Xu_2022_SBB	Grasslands	Arid	Arid_Grasslands	2	unknown	36.0728	110.181	922	10.7233	0.3676	533.362	8.01	6.22562	1.27118	0.513	2.7623	12.1357
P1512	1512	F733-R1083	2	grassphod20	Xu_2022_SBB	Grasslands	Arid	Arid_Grasslands	2	unknown	36.0728	110.181	922	10.7233	0.3676	533.362	8.02	6.66722	0.943235	0.605887	1.72595	11.0041
P1513	1513	F733-R1083	2	grassphod21	Xu_2022_SBB	Grasslands	Cold	Cold_Grasslands	3	unknown	36.7439	109.242	1211	9.49594	0.3542	498.891	8.15	4.37856	0.737933	0.31236	2.64908	14.0177
P1514	1514	F733-R1083	2	grassphod22	Xu_2022_SBB	Grasslands	Cold	Cold_Grasslands	3	unknown	36.7439	109.242	1211	9.49594	0.3542	498.891	8.2	2.89703	0.98189	0.688378	3.13384	4.20849
P1515	1515	F733-R1083	2	grassphod23	Xu_2022_SBB	Grasslands	Cold	Cold_Grasslands	3	unknown	36.7439	109.242	1211	9.49594	0.3542	498.891	8.14	2.33228	0.967163	0.641334	2.72907	3.6366
P1516	1516	F733-R1083	2	grassphod24	Xu_2022_SBB	Grasslands	Cold	Cold_Grasslands	3	unknown	36.7439	109.242	1211	9.49594	0.3542	498.891	8.21	1.96094	1.10518	0.608124	2.10165	3.22457
P1517	1517	F733-R1083	2	grassphod25	Xu_2022_SBB	Grasslands	Cold	Cold_Grasslands	3	unknown	36.7439	109.242	1211	9.49594	0.3542	498.891	8.08	1.86582	0.94423	0.622909	2.7237	2.99534
P1518	1518	F733-R1083	2	grassphod26	Xu_2022_SBB	Grasslands	Arid	Arid_Grasslands	2	unknown	36.9289	107.922	1449	7.46464	0.3233	438.089	8.15	1.57238	0.775592	0.65133	1.92088	2.41411
P1519	1519	F733-R1083	2	grassphod27	Xu_2022_SBB	Grasslands	Arid	Arid_Grasslands	2	unknown	36.9289	107.922	1449	7.46464	0.3233	438.089	8.08	2.36298	1.20579	0.637861	3.26453	3.70454
P1520	1520	F733-R1083	2	grassphod28	Xu_2022_SBB	Grasslands	Arid	Arid_Grasslands	2	unknown	36.9289	107.922	1449	7.46464	0.3233	438.089	8.1	3.13734	0.588913	0.582029	2.45319	5.39035
P1521	1521	F733-R1083	2	grassphod29	Xu_2022_SBB	Grasslands	Arid	Arid_Grasslands	2	unknown	36.9289	107.922	1449	7.46464	0.3233	438.089	8.12	1.74796	0.933667	0.41112	3.13074	4.2517
P1522	1522	F733-R1083	2	grassphod30	Xu_2022_SBB	Grasslands	Arid	Arid_Grasslands	2	unknown	36.9289	107.922	1449	7.46464	0.3233	438.089	8.09	1.04262	1.02831	0.598327	1.32462	1.74255
P1523	1523	F733-R1083	2	grassphod31	Xu_2022_SBB	Grasslands	Arid	Arid_Grasslands	2	unknown	37.5751	107.186	1567	5.22609	0.2454	395.143	8.24	0.615723	0.482496	0.318497	1.50177	1.93321
P1524	1524	F733-R1083	2	grassphod32	Xu_2022_SBB	Grasslands	Arid	Arid_Grasslands	2	unknown	37.5751	107.186	1567	5.22609	0.2454	395.143	8.13	0.528554	0.63853	0.277273	1.4652	1.90626
P1525	1525	F733-R1083	2	grassphod33	Xu_2022_SBB	Grasslands	Arid	Arid_Grasslands	2	unknown	37.5751	107.186	1567	5.22609	0.2454	395.143	8.04	0.528752	0.534812	0.376536	1.87322	1.40425
P1526	1526	F733-R1083	2	grassphod34	Xu_2022_SBB	Grasslands	Arid	Arid_Grasslands	2	unknown	37.5751	107.186	1567	5.22609	0.2454	395.143	7.93	0.525991	0.580757	0.371786	3.29842	1.41477
P1527	1527	F733-R1083	2	grassphod35	Xu_2022_SBB	Grasslands	Arid	Arid_Grasslands	2	unknown	37.5751	107.186	1567	5.22609	0.2454	395.143	8.21	0.967202	0.530957	0.338942	5.50833	2.85359
P1528	1528	F733-R1083	2	grassphod36	Xu_2022_SBB	Deserts	Arid	Deserts	5	unknown	37.4215	105.778	1300	5.86873	0.1497	320.348	8.2	14.6998	0.651189	0.465404	7.07634	31.585
P1529	1529	F733-R1083	2	grassphod37	Xu_2022_SBB	Deserts	Arid	Deserts	5	unknown	37.4215	105.778	1300	5.86873	0.1497	320.348	8.23	33.0042	0.543787	0.447732	6.54367	73.7143
P1530	1530	F733-R1083	2	grassphod38	Xu_2022_SBB	Deserts	Arid	Deserts	5	unknown	37.4215	105.778	1300	5.86873	0.1497	320.348	8.2	16.4404	0.623826	0.450896	5.7747	36.4615
P1531	1531	F733-R1083	2	grassphod39	Xu_2022_SBB	Deserts	Arid	Deserts	5	unknown	37.4215	105.778	1300	5.86873	0.1497	320.348	8.15	21.7613	0.735281	0.459897	6.14222	47.3178
P1532	1532	F733-R1083	2	grassphod40	Xu_2022_SBB	Deserts	Arid	Deserts	5	unknown	37.4215	105.778	1300	5.86873	0.1497	320.348	8.11	27.4722	0.642644	0.47948	5.36393	57.2958
P1533	1533	F733-R1083	2	grassphod41	Xu_2022_SBB	Deserts	Arid	Deserts	5	unknown	37.4423	104.925	1422	7.55535	0.1321	233.879	8.53	17.5145	0.286714	0.315209	1.32406	55.5648
P1534	1534	F733-R1083	2	grassphod42	Xu_2022_SBB	Deserts	Arid	Deserts	5	unknown	37.4423	104.925	1422	7.55535	0.1321	233.879	8.49	17.4839	0.284492	0.322135	0.6669	54.2753
P1535	1535	F733-R1083	2	grassphod43	Xu_2022_SBB	Deserts	Arid	Deserts	5	unknown	37.4423	104.925	1422	7.55535	0.1321	233.879	8.52	21.2137	0.385831	0.331858	2.66688	63.9241
P1536	1536	F733-R1083	2	grassphod44	Xu_2022_SBB	Deserts	Arid	Deserts	5	unknown	37.4423	104.925	1422	7.55535	0.1321	233.879	8.53	27.5109	0.438341	0.350085	2.43076	78.5836
P1537	1537	F733-R1083	2	grassphod45	Xu_2022_SBB	Deserts	Arid	Deserts	5	unknown	37.4423	104.925	1422	7.55535	0.1321	233.879	5.47	19.0232	0.359292	0.435057	2.34966	43.7256
P1538	1538	F733-R1083	2	grassphod46	Xu_2022_SBB	Deserts	Arid	Deserts	5	unknown	37.4644	104.444	1728	7.70569	0.1281	215.5	8.53	4.47572	0.792793	0.88417	5.44255	5.06206
P1539	1539	F733-R1083	2	grassphod47	Xu_2022_SBB	Deserts	Arid	Deserts	5	unknown	37.4644	104.444	1728	7.70569	0.1281	215.5	8.4	5.89838	0.581638	0.536938	5.39474	10.9852
P1540	1540	F733-R1083	2	grassphod48	Xu_2022_SBB	Deserts	Arid	Deserts	5	unknown	37.4644	104.444	1728	7.70569	0.1281	215.5	8.46	4.06407	0.72897	0.594983	5.05849	6.83056
P1541	1541	F733-R1083	2	grassphod49	Xu_2022_SBB	Deserts	Arid	Deserts	5	unknown	37.4644	104.444	1728	7.70569	0.1281	215.5	8.48	4.65084	0.71589	0.673242	3.94114	6.90813
P1542	1542	F733-R1083	2	grassphod50	Xu_2022_SBB	Deserts	Arid	Deserts	5	unknown	37.4644	104.444	1728	7.70569	0.1281	215.5	8.58	3.94336	0.713258	0.555278	4.77408	7.1016
P1543	1543	F733-R1083	2	grassphod51	Xu_2022_SBB	Grasslands	Arid	Arid_Grasslands	2	unknown	44.5932	123.506	142	5.09626	0.3171	448.471	8.87	5.43703	0.548075	0.182698	1.93454	29.7597
P1544	1544	F733-R1083	2	grassphod52	Xu_2022_SBB	Grasslands	Arid	Arid_Grasslands	2	unknown	44.5932	123.506	142	5.09626	0.3171	448.471	9.17	4.49995	0.635027	0.246359	2.15575	18.2658
P1545	1545	F733-R1083	2	grassphod53	Xu_2022_SBB	Grasslands	Arid	Arid_Grasslands	2	unknown	44.5932	123.506	142	5.09626	0.3171	448.471	9.27	1.92855	0.724785	0.325617	9.72192	5.92276
P1546	1546	F733-R1083	2	grassphod54	Xu_2022_SBB	Grasslands	Arid	Arid_Grasslands	2	unknown	44.5932	123.506	142	5.09626	0.3171	448.471	9.06	1.07453	0.566992	0.223043	5.37142	4.8176
P1547	1547	F733-R1083	2	grassphod55	Xu_2022_SBB	Grasslands	Arid	Arid_Grasslands	2	unknown	44.5932	123.506	142	5.09626	0.3171	448.471	9.25	4.51374	0.714763	0.314362	6.53429	14.3584
P1548	1548	F733-R1083	2	grassphod56	Xu_2022_SBB	Grasslands	Arid	Arid_Grasslands	2	unknown	44.5158	121.036	267	5.79732	0.2685	384.386	7.4	2.61493	0.966744	0.125298	1.39803	20.8697
P1549	1549	F733-R1083	2	grassphod57	Xu_2022_SBB	Grasslands	Arid	Arid_Grasslands	2	unknown	44.5158	121.036	267	5.79732	0.2685	384.386	7.76	3.82189	0.654614	0.122194	1.04906	31.2773
P1550	1550	F733-R1083	2	grassphod58	Xu_2022_SBB	Grasslands	Arid	Arid_Grasslands	2	unknown	44.5158	121.036	267	5.79732	0.2685	384.386	7.66	2.79687	0.792866	0.130513	1.62786	21.4299
P1551	1551	F733-R1083	2	grassphod59	Xu_2022_SBB	Grasslands	Arid	Arid_Grasslands	2	unknown	44.5158	121.036	267	5.79732	0.2685	384.386	7.55	2.95093	0.991081	0.140464	0.529851	21.0085
P1552	1552	F733-R1083	2	grassphod60	Xu_2022_SBB	Grasslands	Arid	Arid_Grasslands	2	unknown	44.5158	121.036	267	5.79732	0.2685	384.386	7.73	2.77128	0.856744	0.150665	0.898369	18.3936
P1553	1553	F733-R1083	2	grassphod61	Xu_2022_SBB	Grasslands	Cold	Cold_Grasslands	3	unknown	45.1076	120.332	665	3.7154	0.2944	384.475	7.85	2.08107	2.69563	0.448211	5.96804	4.64307
P1554	1554	F733-R1083	2	grassphod62	Xu_2022_SBB	Grasslands	Cold	Cold_Grasslands	3	unknown	45.1076	120.332	665	3.7154	0.2944	384.475	7.55	3.122	2.7405	0.439882	7.12791	7.09736
P1555	1555	F733-R1083	2	grassphod63	Xu_2022_SBB	Grasslands	Cold	Cold_Grasslands	3	unknown	45.1076	120.332	665	3.7154	0.2944	384.475	7.71	1.90006	2.22656	0.423501	5.59771	4.48655
P1556	1556	F733-R1083	2	grassphod64	Xu_2022_SBB	Grasslands	Cold	Cold_Grasslands	3	unknown	45.1076	120.332	665	3.7154	0.2944	384.475	8	2.25084	2.5053	0.431106	5.9784	5.22109
P1557	1557	F733-R1083	2	grassphod65	Xu_2022_SBB	Grasslands	Cold	Cold_Grasslands	3	unknown	45.1076	120.332	665	3.7154	0.2944	384.475	7.44	0.952042	2.37356	0.394149	7.00481	2.41544
P1558	1558	F733-R1083	2	grassphod66	Xu_2022_SBB	Grasslands	Cold	Cold_Grasslands	3	unknown	44.7729	118.357	1022	0.557572	0.2891	403.582	7.58	0.609256	1.42914	0.238376	3.11725	2.55586
P1559	1559	F733-R1083	2	grassphod67	Xu_2022_SBB	Grasslands	Cold	Cold_Grasslands	3	unknown	44.7729	118.357	1022	0.557572	0.2891	403.582	7.56	0.871343	1.39446	0.289798	5.67611	3.00673
P1560	1560	F733-R1083	2	grassphod68	Xu_2022_SBB	Grasslands	Cold	Cold_Grasslands	3	unknown	44.7729	118.357	1022	0.557572	0.2891	403.582	7.36	0.260719	1.35038	0.311598	3.18108	0.836717
P1561	1561	F733-R1083	2	grassphod69	Xu_2022_SBB	Grasslands	Cold	Cold_Grasslands	3	unknown	44.7729	118.357	1022	0.557572	0.2891	403.582	7.55	1.13204	1.52251	0.253613	1.79091	4.46365
P1562	1562	F733-R1083	2	grassphod70	Xu_2022_SBB	Grasslands	Cold	Cold_Grasslands	3	unknown	44.7729	118.357	1022	0.557572	0.2891	403.582	7.2	2.9585	1.42672	0.237992	2.24909	12.4311
P1563	1563	F733-R1083	2	grassphod71	Xu_2022_SBB	Grasslands	Arid	Arid_Grasslands	2	unknown	44.263	116.524	1130	1.17077	0.2313	315.487	7.54	19.6387	1.76978	0.527913	5.26706	37.2007
P1564	1564	F733-R1083	2	grassphod72	Xu_2022_SBB	Grasslands	Arid	Arid_Grasslands	2	unknown	44.263	116.524	1130	1.17077	0.2313	315.487	6.87	20.0168	1.80044	0.522085	5.82613	38.3402
P1565	1565	F733-R1083	2	grassphod73	Xu_2022_SBB	Grasslands	Arid	Arid_Grasslands	2	unknown	44.263	116.524	1130	1.17077	0.2313	315.487	7.58	17.8118	1.73413	0.462624	10.2695	38.5018
P1566	1566	F733-R1083	2	grassphod74	Xu_2022_SBB	Grasslands	Arid	Arid_Grasslands	2	unknown	44.263	116.524	1130	1.17077	0.2313	315.487	7.56	26.8582	1.78042	0.450972	12.8442	59.5563
P1567	1567	F733-R1083	2	grassphod75	Xu_2022_SBB	Grasslands	Arid	Arid_Grasslands	2	unknown	44.263	116.524	1130	1.17077	0.2313	315.487	7.66	14.7989	1.87817	0.53022	7.69363	27.9108
P1568	1568	F733-R1083	2	grassphod76	Xu_2022_SBB	Grasslands	Arid	Arid_Grasslands	2	unknown	43.5485	116.672	1268	0.161427	0.2694	385.808	7.92	4.52929	2.23974	0.621951	7.26422	7.28239
P1569	1569	F733-R1083	2	grassphod77	Xu_2022_SBB	Grasslands	Arid	Arid_Grasslands	2	unknown	43.5485	116.672	1268	0.161427	0.2694	385.808	7.76	3.82823	1.88575	0.5037	5.08444	7.60022
P1570	1570	F733-R1083	2	grassphod78	Xu_2022_SBB	Grasslands	Arid	Arid_Grasslands	2	unknown	43.5485	116.672	1268	0.161427	0.2694	385.808	7.83	8.71989	2.35669	0.513636	7.19295	16.9768
P1571	1571	F733-R1083	2	grassphod79	Xu_2022_SBB	Grasslands	Arid	Arid_Grasslands	2	unknown	43.5485	116.672	1268	0.161427	0.2694	385.808	7.7	3.15555	2.81466	0.673508	6.68543	4.68525
P1572	1572	F733-R1083	2	grassphod80	Xu_2022_SBB	Grasslands	Arid	Arid_Grasslands	2	unknown	43.5485	116.672	1268	0.161427	0.2694	385.808	7.72	9.23395	1.9975	0.500289	8.1958	18.4572
P1573	1573	F733-R1083	2	grassphod81	Xu_2022_SBB	Grasslands	Arid	Arid_Grasslands	2	unknown	44.5052	117.676	1028	1.96493	0.2673	344.678	7.85	3.86897	2.19152	0.368159	9.46689	10.509
P1574	1574	F733-R1083	2	grassphod82	Xu_2022_SBB	Grasslands	Arid	Arid_Grasslands	2	unknown	44.5052	117.676	1028	1.96493	0.2673	344.678	7.75	5.73911	2.47365	0.370779	5.69187	15.4785
P1575	1575	F733-R1083	2	grassphod83	Xu_2022_SBB	Grasslands	Arid	Arid_Grasslands	2	unknown	44.5052	117.676	1028	1.96493	0.2673	344.678	7.96	1.98914	2.30234	0.358073	6.81664	5.55512
P1576	1576	F733-R1083	2	grassphod84	Xu_2022_SBB	Grasslands	Arid	Arid_Grasslands	2	unknown	44.5052	117.676	1028	1.96493	0.2673	344.678	7.54	3.04676	2.06049	0.347926	6.41318	8.75691
P1577	1577	F733-R1083	2	grassphod85	Xu_2022_SBB	Grasslands	Arid	Arid_Grasslands	2	unknown	44.5052	117.676	1028	1.96493	0.2673	344.678	7.52	1.99311	1.86922	0.334452	4.17676	5.95931
P1578	1578	F733-R1083	2	grassphod86	Xu_2022_SBB	Grasslands	Arid	Arid_Grasslands	2	unknown	44.0056	114.895	1109	0.102255	0.1698	281.177	7.96	2.15131	1.00791	0.236531	3.96088	9.09525
P1579	1579	F733-R1083	2	grassphod87	Xu_2022_SBB	Grasslands	Arid	Arid_Grasslands	2	unknown	44.0056	114.895	1109	0.102255	0.1698	281.177	7.94	4.76266	0.990094	0.272304	5.58789	17.4902
P1580	1580	F733-R1083	2	grassphod88	Xu_2022_SBB	Grasslands	Arid	Arid_Grasslands	2	unknown	44.0056	114.895	1109	0.102255	0.1698	281.177	8.05	1.39878	1.59238	0.438277	4.03607	3.19153
P1581	1581	F733-R1083	2	grassphod89	Xu_2022_SBB	Grasslands	Arid	Arid_Grasslands	2	unknown	44.0056	114.895	1109	0.102255	0.1698	281.177	7.88	1.7242	1.09413	0.299785	3.74659	5.75146
P1582	1582	F733-R1083	2	grassphod90	Xu_2022_SBB	Grasslands	Arid	Arid_Grasslands	2	unknown	44.0056	114.895	1109	0.102255	0.1698	281.177	8.02	2.15328	1.2287	0.352228	7.06302	6.11331
P1583	1583	F733-R1083	2	grassphod91	Xu_2022_SBB	Deserts	Arid	Deserts	5	unknown	43.8422	113.5	1020	2.47122	0.1364	213.161	8.06	1.11286	0.589006	0.281403	3.73638	3.9547
P1584	1584	F733-R1083	2	grassphod92	Xu_2022_SBB	Deserts	Arid	Deserts	5	unknown	43.8422	113.5	1020	2.47122	0.1364	213.161	7.68	0.927387	0.536831	0.202205	3.84471	4.58637
P1585	1585	F733-R1083	2	grassphod93	Xu_2022_SBB	Deserts	Arid	Deserts	5	unknown	43.8422	113.5	1020	2.47122	0.1364	213.161	7.73	1.39164	0.583311	0.238915	3.96385	5.82482
P1586	1586	F733-R1083	2	grassphod94	Xu_2022_SBB	Deserts	Arid	Deserts	5	unknown	43.8422	113.5	1020	2.47122	0.1364	213.161	8.05	1.20737	0.369046	0.182426	4.88081	6.61838
P1587	1587	F733-R1083	2	grassphod95	Xu_2022_SBB	Deserts	Arid	Deserts	5	unknown	43.8422	113.5	1020	2.47122	0.1364	213.161	8.04	0.926525	0.501943	0.241834	4.46368	3.83125
P1588	1588	F733-R1083	2	grassphod96	Xu_2022_SBB	Deserts	Arid	Deserts	5	unknown	43.6333	112.149	952	3.69424	0.1184	168.295	7.98	1.90695	0.203905	0.12822	5.30913	14.8725
P1589	1589	F733-R1083	2	grassphod97	Xu_2022_SBB	Deserts	Arid	Deserts	5	unknown	43.6333	112.149	952	3.69424	0.1184	168.295	7.91	1.7416	0.233912	0.152659	1.83671	11.4085
P1590	1590	F733-R1083	2	grassphod98	Xu_2022_SBB	Deserts	Arid	Deserts	5	unknown	43.6333	112.149	952	3.69424	0.1184	168.295	8.03	3.1088	0.337563	0.202383	5.53828	15.3609
P1591	1591	F733-R1083	2	grassphod99	Xu_2022_SBB	Deserts	Arid	Deserts	5	unknown	43.6333	112.149	952	3.69424	0.1184	168.295	7.79	1.8074	0.253329	0.152428	4.53698	11.8574
P1592	1592	F733-R1083	2	grassphod100	Xu_2022_SBB	Deserts	Arid	Deserts	5	unknown	43.6333	112.149	952	3.69424	0.1184	168.295	7.89	1.03627	0.216033	0.157965	2.60665	6.56011
P1593	1593	F733-R1083	2	grassphod101	Xu_2022_SBB	Grasslands	Polar	Polar	6	unknown	31.4638	95.4548	4170	0.409005	0.6006	619.865	7.18	1.03293	3.88782	0.658598	5.15743	1.56837
P1594	1594	F733-R1083	2	grassphod102	Xu_2022_SBB	Grasslands	Polar	Polar	6	unknown	31.4638	95.4548	4170	0.409005	0.6006	619.865	7.12	0.866789	4.55214	0.758177	6.56731	1.14325
P1595	1595	F733-R1083	2	grassphod103	Xu_2022_SBB	Grasslands	Polar	Polar	6	unknown	31.4638	95.4548	4170	0.409005	0.6006	619.865	7.26	3.03111	2.73874	0.556684	5.20685	5.44494
P1596	1596	F733-R1083	2	grassphod104	Xu_2022_SBB	Grasslands	Polar	Polar	6	unknown	31.4638	95.4548	4170	0.409005	0.6006	619.865	7.83	0.603363	5.5366	0.331489	10.8176	1.82016
P1597	1597	F733-R1083	2	grassphod105	Xu_2022_SBB	Grasslands	Polar	Polar	6	unknown	31.4638	95.4548	4170	0.409005	0.6006	619.865	6.85	1.89418	4.21558	0.664386	7.67897	2.85103
P1598	1598	F733-R1083	2	grassphod106	Xu_2022_SBB	Grasslands	Polar	Polar	6	unknown	31.8513	93.5302	4565	-1.50039	0.6342	536.768	6.07	13.8063	4.72428	0.808111	11.3088	17.0846
P1599	1599	F733-R1083	2	grassphod107	Xu_2022_SBB	Grasslands	Polar	Polar	6	unknown	31.8513	93.5302	4565	-1.50039	0.6342	536.768	7.04	10.5287	4.61404	0.8698	7.69331	12.1047
P1600	1600	F733-R1083	2	grassphod108	Xu_2022_SBB	Grasslands	Polar	Polar	6	unknown	31.8513	93.5302	4565	-1.50039	0.6342	536.768	6.66	11.9257	4.35736	0.859043	6.12293	13.8826
P1601	1601	F733-R1083	2	grassphod109	Xu_2022_SBB	Grasslands	Polar	Polar	6	unknown	31.8513	93.5302	4565	-1.50039	0.6342	536.768	6.85	16.1572	3.53939	0.686842	4.26556	23.5239
P1602	1602	F733-R1083	2	grassphod110	Xu_2022_SBB	Grasslands	Polar	Polar	6	unknown	31.8513	93.5302	4565	-1.50039	0.6342	536.768	6.65	17.9322	3.89641	0.625755	9.61506	28.6569
P1603	1603	F733-R1083	2	grassphod111	Xu_2022_SBB	Grasslands	Cold	Cold_Grasslands	3	unknown	31.6439	92.014	4593	-4.3713	0.3866	501.383	6.93	10.3524	3.36165	0.524402	7.15284	19.7413
P1604	1604	F733-R1083	2	grassphod112	Xu_2022_SBB	Grasslands	Cold	Cold_Grasslands	3	unknown	31.6439	92.014	4593	-4.3713	0.3866	501.383	7.15	10.9079	3.80365	0.553143	6.86967	19.7199
P1605	1605	F733-R1083	2	grassphod113	Xu_2022_SBB	Grasslands	Cold	Cold_Grasslands	3	unknown	31.6439	92.014	4593	-4.3713	0.3866	501.383	7.02	17.5065	3.3919	0.562786	6.72269	31.1069
P1606	1606	F733-R1083	2	grassphod114	Xu_2022_SBB	Grasslands	Cold	Cold_Grasslands	3	unknown	31.6439	92.014	4593	-4.3713	0.3866	501.383	6.84	9.68386	2.9167	0.521922	5.41066	18.5542
P1607	1607	F733-R1083	2	grassphod115	Xu_2022_SBB	Grasslands	Cold	Cold_Grasslands	3	unknown	31.6439	92.014	4593	-4.3713	0.3866	501.383	6.84	13.9341	2.7911	0.500606	7.64723	27.8346
P1608	1608	F733-R1083	2	grassphod116	Xu_2022_SBB	Grasslands	Cold	Cold_Grasslands	3	unknown	31.3847	90.7422	4631	-6.75953	0.3485	526.891	8.01	10.8538	0.632475	0.220064	2.93659	49.3212
P1609	1609	F733-R1083	2	grassphod117	Xu_2022_SBB	Grasslands	Cold	Cold_Grasslands	3	unknown	31.3847	90.7422	4631	-6.75953	0.3485	526.891	8.04	3.05469	0.9271	0.251958	2.91742	12.1238
P1610	1610	F733-R1083	2	grassphod118	Xu_2022_SBB	Grasslands	Cold	Cold_Grasslands	3	unknown	31.3847	90.7422	4631	-6.75953	0.3485	526.891	8.02	5.2055	1.00951	0.248128	1.77897	20.9791
P1611	1611	F733-R1083	2	grassphod119	Xu_2022_SBB	Grasslands	Cold	Cold_Grasslands	3	unknown	31.3847	90.7422	4631	-6.75953	0.3485	526.891	7.99	4.73175	0.871536	0.225162	3.18594	21.0149
P1612	1612	F733-R1083	2	grassphod120	Xu_2022_SBB	Grasslands	Cold	Cold_Grasslands	3	unknown	31.3847	90.7422	4631	-6.75953	0.3485	526.891	8.01	3.46745	0.965956	0.193052	4.0223	17.9612
P1613	1613	F733-R1083	2	grassphod121	Xu_2022_SBB	Grasslands	Polar	Polar	6	unknown	31.5422	89.7216	4597	-3.05951	0.3339	443.793	8.07	4.48141	1.26417	0.264105	5.8832	16.9683
P1614	1614	F733-R1083	2	grassphod122	Xu_2022_SBB	Grasslands	Polar	Polar	6	unknown	31.5422	89.7216	4597	-3.05951	0.3339	443.793	8.02	4.3774	1.23979	0.246472	7.30756	17.7603
P1615	1615	F733-R1083	2	grassphod123	Xu_2022_SBB	Grasslands	Polar	Polar	6	unknown	31.5422	89.7216	4597	-3.05951	0.3339	443.793	8.07	2.54781	1.32054	0.225479	3.63099	11.2995
P1616	1616	F733-R1083	2	grassphod124	Xu_2022_SBB	Grasslands	Polar	Polar	6	unknown	31.5422	89.7216	4597	-3.05951	0.3339	443.793	8.03	3.65846	1.23585	0.288256	3.98172	12.6917
P1617	1617	F733-R1083	2	grassphod125	Xu_2022_SBB	Grasslands	Polar	Polar	6	unknown	31.5422	89.7216	4597	-3.05951	0.3339	443.793	8.08	5.73433	1.33168	0.260952	3.45447	21.9746
P1618	1618	F733-R1083	2	grassphod126	Xu_2022_SBB	Grasslands	Cold	Cold_Grasslands	3	unknown	31.8708	87.8238	4573	-2.5676	0.2083	389.095	8.2	4.14188	0.708429	0.247864	2.14198	16.7103
P1619	1619	F733-R1083	2	grassphod127	Xu_2022_SBB	Grasslands	Cold	Cold_Grasslands	3	unknown	31.8708	87.8238	4573	-2.5676	0.2083	389.095	8.19	1.56534	0.807573	0.323966	1.6743	4.83179
P1620	1620	F733-R1083	2	grassphod128	Xu_2022_SBB	Grasslands	Cold	Cold_Grasslands	3	unknown	31.8708	87.8238	4573	-2.5676	0.2083	389.095	8.17	2.85444	0.723865	0.0265877	3.60518	107.359
P1621	1621	F733-R1083	2	grassphod129	Xu_2022_SBB	Grasslands	Cold	Cold_Grasslands	3	unknown	31.8708	87.8238	4573	-2.5676	0.2083	389.095	8.12	2.66566	0.721005	0.291838	2.2421	9.13404
P1622	1622	F733-R1083	2	grassphod130	Xu_2022_SBB	Grasslands	Cold	Cold_Grasslands	3	unknown	31.8708	87.8238	4573	-2.5676	0.2083	389.095	8.17	2.17007	0.723865	0.329353	1.70917	6.58888
P1623	1623	F733-R1083	2	grassphod131	Xu_2022_SBB	Grasslands	Polar	Polar	6	unknown	31.9205	85.8392	4941	-3.76746	0.1019	376.172	8.38	3.44017	1.10628	0.366959	3.7359	9.3748
P1624	1624	F733-R1083	2	grassphod132	Xu_2022_SBB	Grasslands	Polar	Polar	6	unknown	31.9205	85.8392	4941	-3.76746	0.1019	376.172	8.36	1.06701	1.34861	0.431955	5.37309	2.47019
P1625	1625	F733-R1083	2	grassphod133	Xu_2022_SBB	Grasslands	Polar	Polar	6	unknown	31.9205	85.8392	4941	-3.76746	0.1019	376.172	8.63	2.3876	0.898745	0.346032	2.27596	6.89994
P1626	1626	F733-R1083	2	grassphod134	Xu_2022_SBB	Grasslands	Polar	Polar	6	unknown	31.9205	85.8392	4941	-3.76746	0.1019	376.172	8.3	2.5651	0.781139	0.388855	5.59197	6.59654
P1627	1627	F733-R1083	2	grassphod135	Xu_2022_SBB	Grasslands	Polar	Polar	6	unknown	31.9205	85.8392	4941	-3.76746	0.1019	376.172	8.3	0.70894	0.900942	0.387132	4.17673	1.83126
P1628	1628	F733-R1083	2	grassphod136	Xu_2022_SBB	Grasslands	Polar	Polar	6	unknown	32.4138	83.343	4566	-3.9025	0.0564	317.133	8.28	1.74658	0.988792	0.898502	2.33078	1.94388
P1629	1629	F733-R1083	2	grassphod137	Xu_2022_SBB	Grasslands	Polar	Polar	6	unknown	32.4138	83.343	4566	-3.9025	0.0564	317.133	7.96	4.25524	0.965433	0.757539	5.24955	5.61719
P1630	1630	F733-R1083	2	grassphod138	Xu_2022_SBB	Grasslands	Polar	Polar	6	unknown	32.4138	83.343	4566	-3.9025	0.0564	317.133	7.89	3.0931	0.860986	0.781703	3.92698	3.95688
P1631	1631	F733-R1083	2	grassphod139	Xu_2022_SBB	Grasslands	Polar	Polar	6	unknown	32.4138	83.343	4566	-3.9025	0.0564	317.133	7.84	4.1593	0.738468	0.829679	3.74163	5.01315
P1632	1632	F733-R1083	2	grassphod140	Xu_2022_SBB	Grasslands	Polar	Polar	6	unknown	32.4138	83.343	4566	-3.9025	0.0564	317.133	8.1	0.882864	0.703427	0.95586	4.42142	0.923633
P1633	1633	F733-R1083	2	grassphod141	Xu_2022_SBB	Deserts	Arid	Deserts	5	unknown	32.2989	81.2344	4559	-3.49254	0.0807	291.421	8.4	9.69117	0.246277	0.399317	6.31824	24.2693
P1634	1634	F733-R1083	2	grassphod142	Xu_2022_SBB	Deserts	Arid	Deserts	5	unknown	32.2989	81.2344	4559	-3.49254	0.0807	291.421	8.44	26.8764	0.291707	0.427941	2.90217	62.8039
P1635	1635	F733-R1083	2	grassphod143	Xu_2022_SBB	Deserts	Arid	Deserts	5	unknown	32.2989	81.2344	4559	-3.49254	0.0807	291.421	8.48	15.4218	0.318915	0.34964	4.69184	44.1075
P1636	1636	F733-R1083	2	grassphod144	Xu_2022_SBB	Deserts	Arid	Deserts	5	unknown	32.2989	81.2344	4559	-3.49254	0.0807	291.421	8.4	15.2792	0.32584	0.179897	4.46424	84.9334
P1637	1637	F733-R1083	2	grassphod145	Xu_2022_SBB	Deserts	Arid	Deserts	5	unknown	32.2989	81.2344	4559	-3.49254	0.0807	291.421	8.37	23.0894	0.326618	0.392308	5.18061	58.8553
P1638	1638	F733-R1083	2	grassphod146	Xu_2022_SBB	Deserts	Arid	Deserts	5	unknown	32.4843	80.1453	4329	-1.27199	0.0667	191.709	8.22	34.1771	0.329042	0.0630564	5.20004	542.008
P1639	1639	F733-R1083	2	grassphod147	Xu_2022_SBB	Deserts	Arid	Deserts	5	unknown	32.4843	80.1453	4329	-1.27199	0.0667	191.709	8.29	25.3851	0.326391	0.579463	4.18641	43.808
P1640	1640	F733-R1083	2	grassphod148	Xu_2022_SBB	Deserts	Arid	Deserts	5	unknown	32.4843	80.1453	4329	-1.27199	0.0667	191.709	8.26	26.5457	0.305969	0.552249	3.97829	48.0683
P1641	1641	F733-R1083	2	grassphod149	Xu_2022_SBB	Deserts	Arid	Deserts	5	unknown	32.4843	80.1453	4329	-1.27199	0.0667	191.709	8.33	36.2299	0.385648	0.586989	4.96406	61.7217
P1642	1642	F733-R1083	2	grassphod150	Xu_2022_SBB	Deserts	Arid	Deserts	5	unknown	32.4843	80.1453	4329	-1.27199	0.0667	191.709	7.69	28.3711	0.43876	0.602308	5.5977	47.1039
P1643	1643	F730-R1101	1	SRR9061403	Bi_2020_STOTEN	Croplands	Temperate	Croplands	4	rice	28.2505	115.12	40	17.2	1.1819	1650	5.06831	29.2434	2.46708	0.146079	16.1661	200.189
P1644	1644	F730-R1101	1	SRR9061402	Bi_2020_STOTEN	Croplands	Temperate	Croplands	4	rice	28.2505	115.12	40	17.2	1.1819	1650	4.89261	31.8579	2.13205	0.116511	14.302	273.432
P1645	1645	F730-R1101	1	SRR9061405	Bi_2020_STOTEN	Croplands	Temperate	Croplands	4	rice	28.2505	115.12	40	17.2	1.1819	1650	4.75869	32.7413	2.18053	0.149627	9.18067	218.819
P1646	1646	F730-R1101	1	SRR9061404	Bi_2020_STOTEN	Croplands	Temperate	Croplands	4	rice	28.2505	115.12	40	17.2	1.1819	1650	5.18063	26.1491	2.53214	0.161521	13.838	161.892
P1647	1647	F730-R1101	1	SRR9061399	Bi_2020_STOTEN	Croplands	Temperate	Croplands	4	rice	28.2505	115.12	40	17.2	1.1819	1650	5.08952	21.8741	2.30856	0.134946	9.73502	162.096
P1648	1648	F730-R1101	1	SRR9061398	Bi_2020_STOTEN	Croplands	Temperate	Croplands	4	rice	28.2505	115.12	40	17.2	1.1819	1650	4.99539	26.6991	2.48022	0.111533	4.96643	239.383
P1649	1649	F730-R1101	1	SRR9061401	Bi_2020_STOTEN	Croplands	Temperate	Croplands	4	rice	28.2505	115.12	40	17.2	1.1819	1650	5.02284	24.9565	2.15698	0.129442	8.37634	192.801
P1650	1650	F730-R1101	1	SRR9061400	Bi_2020_STOTEN	Croplands	Temperate	Croplands	4	rice	28.2505	115.12	40	17.2	1.1819	1650	4.98855	29.3228	2.08772	0.0868269	7.03712	337.715
P1651	1651	F730-R1101	1	SRR9061407	Bi_2020_STOTEN	Croplands	Temperate	Croplands	4	rice	28.2505	115.12	40	17.2	1.1819	1650	5.3771	34.912	2.07101	0.174664	20.9054	199.882
P1652	1652	F730-R1101	1	SRR9061406	Bi_2020_STOTEN	Croplands	Temperate	Croplands	4	rice	28.2505	115.12	40	17.2	1.1819	1650	5.38862	33.7995	2.50186	0.22468	20.9267	150.434
P1653	1653	F730-R1101	1	SRR9061425	Bi_2020_STOTEN	Croplands	Temperate	Croplands	4	rice	28.2505	115.12	40	17.2	1.1819	1650	5.39631	28.0354	1.81464	0.162255	17.3052	172.786
P1654	1654	F730-R1101	1	SRR9061424	Bi_2020_STOTEN	Croplands	Temperate	Croplands	4	rice	28.2505	115.12	40	17.2	1.1819	1650	5.41352	25.9211	1.89259	0.253836	27.1162	102.117
P1655	1655	F730-R1101	1	SRR9061423	Bi_2020_STOTEN	Croplands	Temperate	Croplands	4	rice	28.2505	115.12	40	17.2	1.1819	1650	4.89453	35.0081	2.13266	0.163566	8.28667	214.03
P1656	1656	F730-R1101	1	SRR9061422	Bi_2020_STOTEN	Croplands	Temperate	Croplands	4	rice	28.2505	115.12	40	17.2	1.1819	1650	5.08936	32.6749	2.11764	0.144577	8.33332	226.003
P1657	1657	F730-R1101	1	SRR9061421	Bi_2020_STOTEN	Croplands	Temperate	Croplands	4	rice	28.2505	115.12	40	17.2	1.1819	1650	5.06696	23.6941	2.06342	0.154894	8.70651	152.969
P1658	1658	F730-R1101	1	SRR9061420	Bi_2020_STOTEN	Croplands	Temperate	Croplands	4	rice	28.2505	115.12	40	17.2	1.1819	1650	5.14037	11.4488	2.16314	0.167807	9.03654	68.2262
P1659	1659	F730-R1101	1	SRR9061419	Bi_2020_STOTEN	Croplands	Temperate	Croplands	4	rice	28.2505	115.12	40	17.2	1.1819	1650	5.38335	7.1157	2.40092	0.213689	43.3139	33.2993
P1660	1660	F730-R1101	1	SRR9061418	Bi_2020_STOTEN	Croplands	Temperate	Croplands	4	rice	28.2505	115.12	40	17.2	1.1819	1650	5.37082	13.7312	2.82503	0.201488	39.7293	68.1492
P1661	1661	F730-R1101	1	SRR9061427	Bi_2020_STOTEN	Croplands	Temperate	Croplands	4	rice	28.2505	115.12	40	17.2	1.1819	1650	5.45716	5.05316	2.41308	0.202185	38.6534	24.9928
P1662	1662	F730-R1101	1	SRR9061426	Bi_2020_STOTEN	Croplands	Temperate	Croplands	4	rice	28.2505	115.12	40	17.2	1.1819	1650	5.42931	11.8134	2.09762	0.189218	44.3592	62.4328
P1663	1663	F730-R1101	1	SRR9061394	Bi_2020_STOTEN	Croplands	Temperate	Croplands	4	rice	28.2505	115.12	40	17.2	1.1819	1650	5.20634	11.5732	2.05249	0.170097	29.6607	68.039
P1664	1664	F730-R1101	1	SRR9061395	Bi_2020_STOTEN	Croplands	Temperate	Croplands	4	rice	28.2505	115.12	40	17.2	1.1819	1650	5.08322	12.4407	1.84649	0.172217	32.8252	72.2384
P1665	1665	F730-R1101	1	SRR9061392	Bi_2020_STOTEN	Croplands	Temperate	Croplands	4	rice	28.2505	115.12	40	17.2	1.1819	1650	5.26768	12.1507	2.17322	0.169997	29.102	71.4759
P1666	1666	F730-R1101	1	SRR9061393	Bi_2020_STOTEN	Croplands	Temperate	Croplands	4	rice	28.2505	115.12	40	17.2	1.1819	1650	5.24087	5.81264	2.04142	0.181544	58.7045	32.0177
P1667	1667	F733-R1083	2	B1	This study	Grasslands	Cold	Cold_Grasslands	3	unknown	32.828	102.825	3735	1.40833	0.8203	724	5.58	18.971	5.5	0.773763	2.23729	24.5179
P1668	1668	F733-R1083	2	B2	This study	Grasslands	Cold	Cold_Grasslands	3	unknown	32.828	102.825	3735	1.40833	0.8203	724	5.51	20.7277	4.9	0.781328	1.51278	26.5288
P1669	1669	F733-R1083	2	B3	This study	Grasslands	Cold	Cold_Grasslands	3	unknown	32.828	102.825	3735	1.40833	0.8203	724	5.57	18.4319	3.2	0.752562	1.55697	24.4922
P1670	1670	F733-R1083	2	B4	This study	Grasslands	Cold	Cold_Grasslands	3	unknown	32.828	102.825	3735	1.40833	0.8203	724	5.52	12.8485	3.1	0.706121	1.32923	18.1958
P1671	1671	F733-R1083	2	B5	This study	Grasslands	Cold	Cold_Grasslands	3	unknown	32.828	102.825	3735	1.40833	0.8203	724	5.67	13.6341	1.7	0.494847	1.11034	27.5521
P1672	1672	F733-R1083	2	B6	This study	Grasslands	Cold	Cold_Grasslands	3	unknown	32.828	102.825	3735	1.40833	0.8203	724	5.58	19.8034	1.9	0.446742	1.07508	44.3284
P1673	1673	F733-R1083	2	B7	This study	Grasslands	Cold	Cold_Grasslands	3	unknown	32.828	102.825	3735	1.40833	0.8203	724	5.55	9.87966	2.3	0.555203	1.19711	17.7947
P1674	1674	F733-R1083	2	B8	This study	Grasslands	Cold	Cold_Grasslands	3	unknown	32.828	102.825	3735	1.40833	0.8203	724	5.39	15.3974	2.4	0.627834	1.04632	24.5246
P1675	1675	F733-R1083	2	B9	This study	Grasslands	Cold	Cold_Grasslands	3	unknown	32.828	102.825	3735	1.40833	0.8203	724	5.46	17.004	1.9	0.633682	1.80341	26.8337
P1676	1676	F733-R1083	2	B10	This study	Grasslands	Cold	Cold_Grasslands	3	unknown	32.5339	102.969	3322	3.2125	0.8298	715	5.31	15.7513	5.2	1.31099	1.28132	12.0148
P1677	1677	F733-R1083	2	B11	This study	Grasslands	Cold	Cold_Grasslands	3	unknown	32.5339	102.969	3322	3.2125	0.8298	715	5.42	15.1104	4.2	1.29653	1.41187	11.6545
P1678	1678	F733-R1083	2	B12	This study	Grasslands	Cold	Cold_Grasslands	3	unknown	32.5339	102.969	3322	3.2125	0.8298	715	5.25	15.6681	4.9	0.962081	1.54459	16.2856
P1679	1679	F733-R1083	2	B13	This study	Grasslands	Cold	Cold_Grasslands	3	unknown	32.9099	102.595	3552	2.4125	0.7366	705	5.28	13.2181	7	1.36199	2.0108	9.705
P1680	1680	F733-R1083	2	B14	This study	Grasslands	Cold	Cold_Grasslands	3	unknown	32.9099	102.595	3552	2.4125	0.7366	705	5.34	8.6282	7	0.900088	2.49649	9.58596
P1681	1681	F733-R1083	2	B15	This study	Grasslands	Cold	Cold_Grasslands	3	unknown	32.9099	102.595	3552	2.4125	0.7366	705	5.37	9.82143	8	0.993593	3.03477	9.88477
P1682	1682	F733-R1083	2	B16	This study	Grasslands	Cold	Cold_Grasslands	3	unknown	32.9099	102.595	3552	2.4125	0.7366	705	5.38	11.5531	7.1	1.04611	2.38405	11.0439
P1683	1683	F733-R1083	2	B17	This study	Grasslands	Cold	Cold_Grasslands	3	unknown	33.6721	102.945	3482	1.74167	0.692	665	6.32	48.4193	3	0.716414	13.1837	67.5857
P1684	1684	F733-R1083	2	B18	This study	Grasslands	Cold	Cold_Grasslands	3	unknown	33.6721	102.945	3482	1.74167	0.692	665	6.44	69.8506	7.3	0.923037	19.0555	75.6748
P1685	1685	F733-R1083	2	B19	This study	Grasslands	Cold	Cold_Grasslands	3	unknown	33.6721	102.945	3482	1.74167	0.692	665	6.58	67.9561	15.8	1.1181	21.1331	60.778
P1686	1686	F733-R1083	2	B20	This study	Grasslands	Cold	Cold_Grasslands	3	unknown	33.6721	102.945	3482	1.74167	0.692	665	6.74	85.5984	6.9	1.10026	20.9673	77.7981
P1687	1687	F733-R1083	2	B21	This study	Grasslands	Cold	Cold_Grasslands	3	unknown	33.6721	102.945	3482	1.74167	0.692	665	9.08	2.6959	2.2	0.243831	4.99868	11.0564
P1688	1688	F733-R1083	2	B22	This study	Grasslands	Cold	Cold_Grasslands	3	unknown	33.6721	102.945	3482	1.74167	0.692	665	9.43	2.57148	0	0.237685	2.65658	10.8188
P1689	1689	F733-R1083	2	B23	This study	Grasslands	Cold	Cold_Grasslands	3	unknown	33.6721	102.945	3482	1.74167	0.692	665	9.26	1.35605	0	0.265904	3.35687	5.09978
P1690	1690	F733-R1083	2	B24	This study	Grasslands	Cold	Cold_Grasslands	3	unknown	33.6721	102.945	3482	1.74167	0.692	665	8.95	1.80832	0	0.271907	3.67071	6.65052
P1691	1691	F733-R1083	2	B25	This study	Grasslands	Cold	Cold_Grasslands	3	unknown	33.6677	102.932	3466	1.81667	0.6792	658	6.36	48.858	2.4	0.605877	4.9484	80.6402
P1692	1692	F733-R1083	2	B26	This study	Grasslands	Cold	Cold_Grasslands	3	unknown	33.6677	102.932	3466	1.81667	0.6792	658	5.96	41.3478	1.3	0.566068	2.80379	73.0439
P1693	1693	F733-R1083	2	B27	This study	Grasslands	Cold	Cold_Grasslands	3	unknown	33.6677	102.932	3466	1.81667	0.6792	658	5.41	57.3661	5.6	1.30452	3.9003	43.975
P1694	1694	F733-R1083	2	B28	This study	Grasslands	Cold	Cold_Grasslands	3	unknown	32.9093	102.597	3552	2.4125	0.7366	705	5.68	61.8761	5.9	0.644563	2.40145	95.997
P1695	1695	F733-R1083	2	B29	This study	Grasslands	Cold	Cold_Grasslands	3	unknown	32.9093	102.597	3552	2.4125	0.7366	705	5.58	69.6787	7.5	0.729431	2.51099	95.5247
P1696	1696	F733-R1083	2	B30	This study	Grasslands	Cold	Cold_Grasslands	3	unknown	32.9093	102.597	3552	2.4125	0.7366	705	5.72	58.0656	5.6	0.911307	1.78208	63.7168
P1697	1697	F733-R1083	2	B31	This study	Grasslands	Cold	Cold_Grasslands	3	unknown	32.9093	102.597	3552	2.4125	0.7366	705	5.59	64.6416	7.5	0.758002	2.85369	85.2789
P1698	1698	F733-R1083	2	B32	This study	Grasslands	Cold	Cold_Grasslands	3	unknown	32.5336	102.295	3601	2.68333	0.7445	711	5.54	98.5449	11.7	1.64373	14.3254	59.9521
P1699	1699	F733-R1083	2	B33	This study	Grasslands	Cold	Cold_Grasslands	3	unknown	32.5336	102.295	3601	2.68333	0.7445	711	5.61	125.359	13.8	1.1496	14.2229	109.046
P1700	1700	F733-R1083	2	B34	This study	Grasslands	Cold	Cold_Grasslands	3	unknown	32.5336	102.295	3601	2.68333	0.7445	711	5.63	71.4953	9	1.37814	6.10848	51.8782
P1701	1701	F733-R1083	2	B35	This study	Grasslands	Cold	Cold_Grasslands	3	unknown	32.5336	102.295	3601	2.68333	0.7445	711	5.62	84.769	9	1.07391	6.68824	78.9346
P1702	1702	F733-R1083	2	B36	This study	Grasslands	Polar	Polar	6	unknown	33.087	101.506	3590	1.30417	0.7838	751	5.44	87.1224	9.3	0.867244	1.7813	100.459
P1703	1703	F733-R1083	2	B37	This study	Grasslands	Polar	Polar	6	unknown	33.087	101.506	3590	1.30417	0.7838	751	5.54	78.2542	8.3	0.636092	2.15913	123.023
P1704	1704	F733-R1083	2	B38	This study	Grasslands	Polar	Polar	6	unknown	33.087	101.506	3590	1.30417	0.7838	751	5.61	74.9748	5.7	0.643582	1.78532	116.496
P1705	1705	F733-R1083	2	B39	This study	Grasslands	Polar	Polar	6	unknown	33.087	101.506	3590	1.30417	0.7838	751	5.6	80.5957	6.4	0.785813	2.18014	102.564
P1706	1706	F733-R1083	2	B40	This study	Grasslands	Polar	Polar	6	unknown	33.087	101.506	3590	1.30417	0.7838	751	5.95	34.3287	2.2	0.540182	1.60438	63.5503
P1707	1707	F733-R1083	2	B41	This study	Grasslands	Polar	Polar	6	unknown	33.087	101.506	3590	1.30417	0.7838	751	6.02	34.1129	2.7	0.180402	2.18566	189.094
P1708	1708	F733-R1083	2	B42	This study	Grasslands	Polar	Polar	6	unknown	33.087	101.506	3590	1.30417	0.7838	751	6.03	37.1488	2	0.644834	1.82248	57.6099
P1709	1709	F733-R1083	2	B43	This study	Grasslands	Polar	Polar	6	unknown	33.087	101.506	3590	1.30417	0.7838	751	5.98	38.5256	2.5	0.725862	1.82011	53.0756
P1710	1710	F733-R1083	2	B44	This study	Grasslands	Cold	Cold_Grasslands	3	unknown	32.5306	102.323	3541	3.02083	0.7348	710	5.74	73.7619	8.7	1.03938	5.98154	70.9674
P1711	1711	F733-R1083	2	B45	This study	Grasslands	Cold	Cold_Grasslands	3	unknown	32.5306	102.323	3541	3.02083	0.7348	710	5.68	70.5497	6	1.00017	4.99047	70.538
P1712	1712	F733-R1083	2	B46	This study	Grasslands	Cold	Cold_Grasslands	3	unknown	32.5306	102.323	3541	3.02083	0.7348	710	5.82	83.9712	8.1	1.25668	5.52745	66.8199
P1713	1713	F733-R1083	2	B47	This study	Grasslands	Cold	Cold_Grasslands	3	unknown	32.5306	102.323	3541	3.02083	0.7348	710	5.71	73.8846	8.4	1.15114	5.47278	64.184
P1714	1714	F733-R1083	2	B48	This study	Grasslands	Cold	Cold_Grasslands	3	unknown	32.9765	102.991	3568	2.00833	0.7903	715	5.84	78.2308	7.9	1.33071	7.30458	58.7886
P1715	1715	F733-R1083	2	B49	This study	Grasslands	Cold	Cold_Grasslands	3	unknown	32.9765	102.991	3568	2.00833	0.7903	715	5.92	87.4707	7.9	1.33362	8.04034	65.5889
P1716	1716	F733-R1083	2	B50	This study	Grasslands	Cold	Cold_Grasslands	3	unknown	32.9765	102.991	3568	2.00833	0.7903	715	5.9	84.384	8.1	1.4601	5.4936	57.7933
P1717	1717	F733-R1083	2	B51	This study	Grasslands	Cold	Cold_Grasslands	3	unknown	32.9765	102.991	3568	2.00833	0.7903	715	5.46	91.0129	16.7	1.42549	7.53458	63.8468
P1718	1718	F733-R1083	2	B52	This study	Grasslands	Cold	Cold_Grasslands	3	unknown	33.1181	102.921	3555	2.07083	0.7463	696	5.99	45.0112	2	0.709915	2.33729	63.4037
P1719	1719	F733-R1083	2	B53	This study	Grasslands	Cold	Cold_Grasslands	3	unknown	33.1181	102.921	3555	2.07083	0.7463	696	5.94	45.5064	2.4	0.773692	1.95955	58.8172
P1720	1720	F733-R1083	2	B54	This study	Grasslands	Cold	Cold_Grasslands	3	unknown	33.1181	102.921	3555	2.07083	0.7463	696	5.72	35.9507	2.3	0.723669	4.35668	49.6784
P1721	1721	F733-R1083	2	B55	This study	Grasslands	Cold	Cold_Grasslands	3	unknown	32.6642	102.266	3594	2.80417	0.7216	725	5.41	80.1113	6.4	1.09832	3.52584	72.9399
P1722	1722	F733-R1083	2	B56	This study	Grasslands	Cold	Cold_Grasslands	3	unknown	32.6642	102.266	3594	2.80417	0.7216	725	5.43	66.8959	5.2	1.04804	5.77596	63.8294
P1723	1723	F733-R1083	2	B57	This study	Grasslands	Cold	Cold_Grasslands	3	unknown	32.6642	102.266	3594	2.80417	0.7216	725	5.49	66.4645	4.9	0.704104	5.65344	94.3959
P1724	1724	F733-R1083	2	B58	This study	Grasslands	Cold	Cold_Grasslands	3	unknown	32.6642	102.266	3594	2.80417	0.7216	725	5.43	68.4204	5	0.933284	3.19039	73.3114
P1725	1725	F733-R1083	2	B59	This study	Grasslands	Cold	Cold_Grasslands	3	unknown	32.4652	102.366	3549	3.15417	0.7329	709	5.58	44.452	2.9	0.267469	2.98498	166.195
P1726	1726	F733-R1083	2	B60	This study	Grasslands	Cold	Cold_Grasslands	3	unknown	32.4652	102.366	3549	3.15417	0.7329	709	5.35	45.1495	2.9	0.82571	3.56282	54.6795
P1727	1727	F733-R1083	2	B61	This study	Grasslands	Cold	Cold_Grasslands	3	unknown	32.4652	102.366	3549	3.15417	0.7329	709	5.21	36.3626	1.9	0.566484	1.69482	64.1899
P1728	1728	F733-R1083	2	B62	This study	Grasslands	Cold	Cold_Grasslands	3	unknown	33.8569	102.928	3453	2.07917	0.6633	656	6.5	52.3604	3.9	0.548204	7.75638	95.5126
P1729	1729	F733-R1083	2	B63	This study	Grasslands	Cold	Cold_Grasslands	3	unknown	33.8569	102.928	3453	2.07917	0.6633	656	6.5	46.2866	2.8	0.535835	7.20242	86.3821
P1730	1730	F733-R1083	2	B64	This study	Grasslands	Cold	Cold_Grasslands	3	unknown	33.8569	102.928	3453	2.07917	0.6633	656	6.53	48.5099	3.1	0.282697	7.9393	171.597
P1731	1731	F733-R1083	2	B65	This study	Grasslands	Cold	Cold_Grasslands	3	unknown	33.9621	102.825	3469	2	0.6664	657	8.02	48.9092	3	0.549387	6.24183	89.0251
P1732	1732	F733-R1083	2	B66	This study	Grasslands	Cold	Cold_Grasslands	3	unknown	33.9621	102.825	3469	2	0.6664	657	8.09	51.082	3.4	0.798064	7.42284	64.0074
P1733	1733	F733-R1083	2	B67	This study	Grasslands	Cold	Cold_Grasslands	3	unknown	33.9621	102.825	3469	2	0.6664	657	8.16	40.6617	3.1	0.727188	5.74888	55.9164
P1734	1734	F733-R1083	2	B68	This study	Grasslands	Cold	Cold_Grasslands	3	unknown	33.3416	103.207	3694	0.991667	0.7944	703	5.75	79.0472	6.3	0.916198	8.22002	86.2775
P1735	1735	F733-R1083	2	B69	This study	Grasslands	Cold	Cold_Grasslands	3	unknown	33.3416	103.207	3694	0.991667	0.7944	703	5.62	78.6462	5.3	1.03776	5.68057	75.7843
P1736	1736	F733-R1083	2	B70	This study	Grasslands	Cold	Cold_Grasslands	3	unknown	33.3416	103.207	3694	0.991667	0.7944	703	5.75	82.5976	6.7	0.807202	5.73241	102.326
P1737	1737	F733-R1083	2	B71	This study	Grasslands	Cold	Cold_Grasslands	3	unknown	33.3416	103.207	3694	0.991667	0.7944	703	5.87	100.492	8.1	0.835074	7.40817	120.339
P1738	1738	F733-R1083	2	B72	This study	Grasslands	Cold	Cold_Grasslands	3	unknown	33.5214	102.725	3462	2.00417	0.7062	683	5.78	47.3967	1.8	0.249861	4.57536	189.692
P1739	1739	F733-R1083	2	B73	This study	Grasslands	Cold	Cold_Grasslands	3	unknown	33.5214	102.725	3462	2.00417	0.7062	683	5.24	107.915	8.2	0.995963	3.73074	108.353
P1740	1740	F733-R1083	2	B74	This study	Grasslands	Cold	Cold_Grasslands	3	unknown	33.5214	102.725	3462	2.00417	0.7062	683	5.81	96.6423	8.5	1.03003	3.18733	93.8245
P1741	1741	F733-R1083	2	B75	This study	Grasslands	Cold	Cold_Grasslands	3	unknown	33.5214	102.725	3462	2.00417	0.7062	683	5.35	96.0492	9.9	1.06578	4.86332	90.1212
P1742	1742	F733-R1083	2	B76	This study	Grasslands	Cold	Cold_Grasslands	3	unknown	33.3966	102.46	3436	2.2625	0.6878	690	6.23	55.5956	3.9	0.669611	5.65764	83.0266
P1743	1743	F733-R1083	2	B77	This study	Grasslands	Cold	Cold_Grasslands	3	unknown	33.3966	102.46	3436	2.2625	0.6878	690	5.9	39.3255	2.2	0.786807	5.17982	49.9811
P1744	1744	F733-R1083	2	B78	This study	Grasslands	Cold	Cold_Grasslands	3	unknown	33.3966	102.46	3436	2.2625	0.6878	690	5.91	38.4957	2.1	0.289636	3.96078	132.911
P1745	1745	F733-R1083	2	B79	This study	Grasslands	Cold	Cold_Grasslands	3	unknown	33.3966	102.46	3436	2.2625	0.6878	690	5.9	38.1599	3	0.590262	5.42172	64.6491
P1746	1746	F733-R1083	2	B80	This study	Grasslands	Cold	Cold_Grasslands	3	unknown	32.9152	101.86	3725	1.475	0.7479	737	5.35	92.6513	6.7	0.70202	6.32678	131.978
P1747	1747	F733-R1083	2	B81	This study	Grasslands	Cold	Cold_Grasslands	3	unknown	32.9152	101.86	3725	1.475	0.7479	737	5.31	97.8541	7.1	0.657429	4.37891	148.844
P1748	1748	F733-R1083	2	B82	This study	Grasslands	Cold	Cold_Grasslands	3	unknown	32.9152	101.86	3725	1.475	0.7479	737	5.33	72.8954	5.6	0.657812	5.50804	110.815
P1749	1749	F733-R1083	2	B83	This study	Grasslands	Cold	Cold_Grasslands	3	unknown	32.9152	101.86	3725	1.475	0.7479	737	5.42	77.2744	6	0.640743	1.01438	120.601
P1750	1750	F733-R1083	2	B84	This study	Grasslands	Cold	Cold_Grasslands	3	unknown	32.8551	101.695	3799	0.925	0.7914	739	5.39	66.3415	4.8	0.934852	2.11067	70.9647
P1751	1751	F733-R1083	2	B85	This study	Grasslands	Cold	Cold_Grasslands	3	unknown	32.8551	101.695	3799	0.925	0.7914	739	5.3	63.0157	3.9	1.04235	1.68635	60.4552
P1752	1752	F733-R1083	2	B86	This study	Grasslands	Cold	Cold_Grasslands	3	unknown	32.8551	101.695	3799	0.925	0.7914	739	5.41	50.6948	3.4	0.912091	2.8807	55.5809
P1753	1753	F733-R1083	2	B87	This study	Grasslands	Cold	Cold_Grasslands	3	unknown	32.8551	101.695	3799	0.925	0.7914	739	5.26	77.5187	4.6	0.804599	3.71768	96.3445
P1754	1754	F733-R1083	2	B88	This study	Grasslands	Cold	Cold_Grasslands	3	unknown	32.878	101.992	3561	2.37917	0.7175	726	5.61	57.9732	7	0.958484	3.64122	60.4843
P1755	1755	F733-R1083	2	B89	This study	Grasslands	Cold	Cold_Grasslands	3	unknown	32.878	101.992	3561	2.37917	0.7175	726	5.36	123.431	12.5	1.08568	2.86974	113.69
P1756	1756	F733-R1083	2	B90	This study	Grasslands	Cold	Cold_Grasslands	3	unknown	32.878	101.992	3561	2.37917	0.7175	726	5.33	106.624	11.4	0.755648	1.54291	141.103
P1757	1757	F733-R1083	2	B91	This study	Grasslands	Cold	Cold_Grasslands	3	unknown	32.878	101.992	3561	2.37917	0.7175	726	5.29	106.038	11.5	1.11721	1.92804	94.9131
P1758	1758	F733-R1083	2	B92	This study	Grasslands	Cold	Cold_Grasslands	3	unknown	33.0369	102.022	3535	1.96667	0.7432	724	5.31	78.5405	5.8	0.571992	1.14958	137.311
P1759	1759	F733-R1083	2	B93	This study	Grasslands	Cold	Cold_Grasslands	3	unknown	33.0369	102.022	3535	1.96667	0.7432	724	5.3	73.9058	7.1	0.642625	1.04191	115.006
P1760	1760	F733-R1083	2	B94	This study	Grasslands	Cold	Cold_Grasslands	3	unknown	33.0369	102.022	3535	1.96667	0.7432	724	5.58	49.8897	4.4	0.670876	1.07898	74.365
P1761	1761	F733-R1083	2	B95	This study	Grasslands	Cold	Cold_Grasslands	3	unknown	33.0369	102.022	3535	1.96667	0.7432	724	5.49	48.7028	3.7	0.611249	1.98577	79.6775
P1762	1762	F733-R1083	2	B96	This study	Grasslands	Cold	Cold_Grasslands	3	unknown	33.1264	102.355	3731	1	0.7906	728	5.46	73.8083	6.6	0.912631	2.13633	80.8742
P1763	1763	F733-R1083	2	B97	This study	Grasslands	Cold	Cold_Grasslands	3	unknown	33.1264	102.355	3731	1	0.7906	728	5.36	69.5586	7.1	0.515219	3.19667	135.008
P1764	1764	F733-R1083	2	B98	This study	Grasslands	Cold	Cold_Grasslands	3	unknown	33.1264	102.355	3731	1	0.7906	728	5.38	74.0585	6.1	0.841097	2.21109	88.0499
P1765	1765	F733-R1083	2	B99	This study	Grasslands	Cold	Cold_Grasslands	3	unknown	33.1264	102.355	3731	1	0.7906	728	5.42	76.0181	5.7	0.674981	2.24998	112.622
P1766	1766	F733-R1083	2	B100	This study	Grasslands	Polar	Polar	6	unknown	32.2639	101.19	3663	2.85417	0.664	704	4.86	88.9805	10.4	1.24601	2.48331	71.4122
P1767	1767	F733-R1083	2	B101	This study	Grasslands	Polar	Polar	6	unknown	32.2639	101.19	3663	2.85417	0.664	704	5	98.3077	11.2	0.862054	3.0684	114.039
P1768	1768	F733-R1083	2	B102	This study	Grasslands	Polar	Polar	6	unknown	32.2639	101.19	3663	2.85417	0.664	704	5.08	77.2806	6.8	0.56838	3.00916	135.966
P1769	1769	F733-R1083	2	B103	This study	Grasslands	Polar	Polar	6	unknown	32.2639	101.19	3663	2.85417	0.664	704	4.86	101.637	9.1	1.14861	4.69019	88.487
P1770	1770	F733-R1083	2	B104	This study	Grasslands	Polar	Polar	6	unknown	32.5246	101.064	3390	3.82917	0.6317	711	5.87	23.5529	1.2	0.415488	2.77885	56.6873
P1771	1771	F733-R1083	2	B105	This study	Grasslands	Polar	Polar	6	unknown	32.5246	101.064	3390	3.82917	0.6317	711	5.86	22.2014	2	0.265243	5.01271	83.7021
P1772	1772	F733-R1083	2	B106	This study	Grasslands	Polar	Polar	6	unknown	32.5246	101.064	3390	3.82917	0.6317	711	5.92	18.271	1.6	0.0817792	7.16094	223.419
P1773	1773	F733-R1083	2	B107	This study	Grasslands	Polar	Polar	6	unknown	32.5246	101.064	3390	3.82917	0.6317	711	5.99	20.1093	1.6	0.368825	4.72413	54.5225
P1774	1774	F733-R1083	2	B108	This study	Grasslands	Polar	Polar	6	unknown	32.3797	101.09	3499	3.57917	0.6194	696	6.49	14.7965	1.7	0.339211	3.25476	43.6203
P1775	1775	F733-R1083	2	B109	This study	Grasslands	Polar	Polar	6	unknown	32.3797	101.09	3499	3.57917	0.6194	696	6.5	18.0337	1.7	0.440625	3.40601	40.9276
P1776	1776	F733-R1083	2	B110	This study	Grasslands	Polar	Polar	6	unknown	32.3797	101.09	3499	3.57917	0.6194	696	6.79	14.8627	2.5	0.636883	6.65278	23.3366
P1777	1777	F733-R1083	2	B111	This study	Grasslands	Polar	Polar	6	unknown	32.3797	101.09	3499	3.57917	0.6194	696	6.65	15.8976	1.7	0.713342	6.02294	22.2861
P1778	1778	F733-R1083	2	B112	This study	Grasslands	Polar	Polar	6	unknown	32.2956	101.518	4282	-0.683333	0.9133	753	5.33	287.922	9.2589	0.256282	1.39057	1123.46
P1779	1779	F733-R1083	2	B113	This study	Grasslands	Polar	Polar	6	unknown	32.2956	101.518	4282	-0.683333	0.9133	753	5.3	301.338	10.7692	0.429673	1.4643	701.318
P1780	1780	F733-R1083	2	B114	This study	Grasslands	Polar	Polar	6	unknown	32.2956	101.518	4282	-0.683333	0.9133	753	5.38	343.33	10.3578	0.165683	1.15579	2072.21
P1781	1781	F733-R1083	2	B115	This study	Grasslands	Polar	Polar	6	unknown	32.2956	101.518	4282	-0.683333	0.9133	753	5.42	218.521	10.0555	0.480789	1.58685	454.506
P1782	1782	F733-R1083	2	B116	This study	Grasslands	Cold	Cold_Grasslands	3	unknown	33.1032	98.2089	4010	0.529167	0.4763	512	6.22	73.0897	5.6	0.806336	8.05162	90.6442
P1783	1783	F733-R1083	2	B117	This study	Grasslands	Cold	Cold_Grasslands	3	unknown	33.1032	98.2089	4010	0.529167	0.4763	512	6.48	44.2566	2.7	0.637444	6.08842	69.4281
P1784	1784	F733-R1083	2	B118	This study	Grasslands	Cold	Cold_Grasslands	3	unknown	33.1032	98.2089	4010	0.529167	0.4763	512	6.75	48.8808	3.2	0.713455	23.4726	68.5128
P1785	1785	F733-R1083	2	B119	This study	Grasslands	Cold	Cold_Grasslands	3	unknown	33.1032	98.2089	4010	0.529167	0.4763	512	6.62	59.3112	4.3	0.741802	6.41756	79.9556
P1786	1786	F733-R1083	2	B120	This study	Grasslands	Cold	Cold_Grasslands	3	unknown	33.1032	98.2089	4010	0.529167	0.4763	512	6.35	78.4802	5.6	0.71974	11.0821	109.04
P1787	1787	F733-R1083	2	B121	This study	Grasslands	Cold	Cold_Grasslands	3	unknown	33.1028	98.2064	4071	0.2625	0.4874	519	7.68	16.8157	4.4	1.09767	10.2577	15.3195
P1788	1788	F733-R1083	2	B122	This study	Grasslands	Cold	Cold_Grasslands	3	unknown	33.1028	98.2064	4071	0.2625	0.4874	519	6.68	50.8785	4.9	0.788095	11.9669	64.5588
P1789	1789	F733-R1083	2	B123	This study	Grasslands	Cold	Cold_Grasslands	3	unknown	33.1028	98.2064	4071	0.2625	0.4874	519	6.31	41.1627	4.2	0.762071	11.6975	54.0142
P1790	1790	F733-R1083	2	B124	This study	Grasslands	Cold	Cold_Grasslands	3	unknown	33.1028	98.2064	4071	0.2625	0.4874	519	5.9	30.9736	4.3	0.694924	7.84228	44.5713
P1791	1791	F733-R1083	2	B125	This study	Grasslands	Cold	Cold_Grasslands	3	unknown	33.1028	98.2064	4071	0.2625	0.4874	519	6.84	28.871	3.8	0.826154	15.6571	34.9463
P1792	1792	F733-R1083	2	B126	This study	Grasslands	Polar	Polar	6	unknown	33.1575	98.1316	4093	0.0458332	0.4833	514	7.14	63.3854	2.9	0.801496	13.9124	79.0838
P1793	1793	F733-R1083	2	B127	This study	Grasslands	Polar	Polar	6	unknown	33.1575	98.1316	4093	0.0458332	0.4833	514	6.95	28.1679	3.7	0.989941	14.9329	28.4541
P1794	1794	F733-R1083	2	B128	This study	Grasslands	Polar	Polar	6	unknown	33.1575	98.1316	4093	0.0458332	0.4833	514	6.85	56.1224	4.9	0.832716	16.5817	67.3969
P1795	1795	F733-R1083	2	B129	This study	Grasslands	Polar	Polar	6	unknown	33.1575	98.1316	4093	0.0458332	0.4833	514	6.28	62.5444	1.2	0.835266	12.6276	74.8797
P1796	1796	F733-R1083	2	B130	This study	Grasslands	Polar	Polar	6	unknown	33.1575	98.1316	4093	0.0458332	0.4833	514	6.68	79.5243	3.9	0.84829	9.88318	93.7466
P1797	1797	F733-R1083	2	B131	This study	Grasslands	Polar	Polar	6	unknown	33.3347	97.8875	4114	-0.6875	0.492	502	7.11	97.0812	4.5	0.622813	16.239	155.875
P1798	1798	F733-R1083	2	B132	This study	Grasslands	Polar	Polar	6	unknown	33.3347	97.8875	4114	-0.6875	0.492	502	7.78	74.1454	4.9	0.716213	9.79933	103.524
P1799	1799	F733-R1083	2	B133	This study	Grasslands	Polar	Polar	6	unknown	33.3347	97.8875	4114	-0.6875	0.492	502	7.4	36.1715	2.6	0.597089	18.1996	60.5796
P1800	1800	F733-R1083	2	B134	This study	Grasslands	Polar	Polar	6	unknown	33.3347	97.8875	4114	-0.6875	0.492	502	7.36	53.8268	3	0.522469	45.6298	103.024
P1801	1801	F733-R1083	2	B135	This study	Grasslands	Polar	Polar	6	unknown	33.3347	97.8875	4114	-0.6875	0.492	502	7.05	66.6244	3.1	0.703454	10.2181	94.7104
P1802	1802	F733-R1083	2	B136	This study	Grasslands	Polar	Polar	6	unknown	33.0626	97.9616	4191	-0.7125	0.5456	528	5.84	78.268	5.7	1.1479	49.933	68.1836
P1803	1803	F733-R1083	2	B137	This study	Grasslands	Polar	Polar	6	unknown	33.0626	97.9616	4191	-0.7125	0.5456	528	5.96	91.1267	6.9	1.10258	16.7453	82.6489
P1804	1804	F733-R1083	2	B138	This study	Grasslands	Polar	Polar	6	unknown	33.0626	97.9616	4191	-0.7125	0.5456	528	5.6	71.6224	5.9	1.03338	17.4199	69.3091
P1805	1805	F733-R1083	2	B139	This study	Grasslands	Polar	Polar	6	unknown	33.0626	97.9616	4191	-0.7125	0.5456	528	5.7	67.4789	4.9	0.981177	11.6699	68.7735
P1806	1806	F733-R1083	2	B140	This study	Grasslands	Polar	Polar	6	unknown	33.0626	97.9616	4191	-0.7125	0.5456	528	5.68	82.7359	6.2	1.24629	15.5841	66.3858
P1807	1807	F733-R1083	2	B141	This study	Grasslands	Polar	Polar	6	unknown	32.8116	98.5685	3941	1.56667	0.4864	538	6.31	28.9127	1.9	0.733356	1.15309	39.4252
P1808	1808	F733-R1083	2	B142	This study	Grasslands	Polar	Polar	6	unknown	32.8116	98.5685	3941	1.56667	0.4864	538	5.82	41.6391	3.3	0.932337	9.04912	44.661
P1809	1809	F733-R1083	2	B143	This study	Grasslands	Polar	Polar	6	unknown	32.8116	98.5685	3941	1.56667	0.4864	538	6.03	30.7742	3.6	0.927883	3.625	33.166
P1810	1810	F733-R1083	2	B144	This study	Grasslands	Polar	Polar	6	unknown	32.8116	98.5685	3941	1.56667	0.4864	538	6.24	19.3924	2.8	0.855704	3.87043	22.6625
P1811	1811	F733-R1083	2	B145	This study	Grasslands	Polar	Polar	6	unknown	32.8116	98.5685	3941	1.56667	0.4864	538	5.99	108.57	2.7	0.922472	4.37571	117.695
P1812	1812	F733-R1083	2	B146	This study	Grasslands	Polar	Polar	6	unknown	32.8897	98.3826	4068	0.816667	0.4925	530	6.78	46.7876	5.3	0.887897	11.0098	52.6949
P1813	1813	F733-R1083	2	B147	This study	Grasslands	Polar	Polar	6	unknown	32.8897	98.3826	4068	0.816667	0.4925	530	6.4	76.7888	6.7	0.899071	12.6227	85.4091
P1814	1814	F733-R1083	2	B148	This study	Grasslands	Polar	Polar	6	unknown	32.8897	98.3826	4068	0.816667	0.4925	530	6.48	40.7671	6	0.917568	8.89363	44.4295
P1815	1815	F733-R1083	2	B149	This study	Grasslands	Polar	Polar	6	unknown	32.8897	98.3826	4068	0.816667	0.4925	530	6.25	97.5904	6.8	0.77449	8.37482	126.006
P1816	1816	F733-R1083	2	B150	This study	Grasslands	Polar	Polar	6	unknown	33.0205	98.3309	3994	0.8625	0.4819	521	7.02	42.9497	4.3	0.661715	8.14533	64.9066
P1817	1817	F733-R1083	2	B151	This study	Grasslands	Polar	Polar	6	unknown	33.0205	98.3309	3994	0.8625	0.4819	521	7.15	52.711	6.3	0.722759	8.60933	72.9303
P1818	1818	F733-R1083	2	B152	This study	Grasslands	Polar	Polar	6	unknown	33.0205	98.3309	3994	0.8625	0.4819	521	6.84	58.6562	7.3	0.837815	12.0509	70.011
P1819	1819	F733-R1083	2	B153	This study	Grasslands	Polar	Polar	6	unknown	32.8736	98.0168	4374	-1.69167	0.6559	559	5.72	131.433	13.3	1.43462	12.4213	91.6149
P1820	1820	F733-R1083	2	B154	This study	Grasslands	Polar	Polar	6	unknown	32.8736	98.0168	4374	-1.69167	0.6559	559	5.52	99.8507	13.3	1.53644	13.1839	64.9885
P1821	1821	F733-R1083	2	B155	This study	Grasslands	Polar	Polar	6	unknown	32.8736	98.0168	4374	-1.69167	0.6559	559	5.5	132.152	11.7	1.44855	7.73947	91.2306
P1822	1822	F733-R1083	2	B156	This study	Grasslands	Polar	Polar	6	unknown	32.8736	98.0168	4374	-1.69167	0.6559	559	5.8	151.531	13.4	1.41993	9.46968	106.717
P1823	1823	F733-R1083	2	B157	This study	Grasslands	Polar	Polar	6	unknown	31.8142	100.252	4195	0.341667	0.7725	682	5.84	38.4104	3.3	0.980045	3.41313	39.1925
P1824	1824	F733-R1083	2	B158	This study	Grasslands	Polar	Polar	6	unknown	31.8142	100.252	4195	0.341667	0.7725	682	5.8	56.1762	5.1	1.04328	3.27856	53.8457
P1825	1825	F733-R1083	2	B159	This study	Grasslands	Polar	Polar	6	unknown	31.8142	100.252	4195	0.341667	0.7725	682	5.56	42.6632	4.9	1.03958	4.13954	41.0388
P1826	1826	F733-R1083	2	B160	This study	Grasslands	Polar	Polar	6	unknown	31.8142	100.252	4195	0.341667	0.7725	682	5.69	47.8124	7.2	1.23343	10.2112	38.7637
P1827	1827	F733-R1083	2	B161	This study	Grasslands	Polar	Polar	6	unknown	31.8142	100.252	4195	0.341667	0.7725	682	5.67	64.4689	6.9	1.61676	7.32914	39.8754
P1828	1828	F733-R1083	2	B162	This study	Grasslands	Cold	Cold_Grasslands	3	unknown	31.6985	100.18	3747	3.73333	0.5849	651	5.96	49.8509	4.7	0.871497	1.26388	57.2015
P1829	1829	F733-R1083	2	B163	This study	Grasslands	Cold	Cold_Grasslands	3	unknown	31.6985	100.18	3747	3.73333	0.5849	651	6.4	35.75	3	0.946078	5.59762	37.7876
P1830	1830	F733-R1083	2	B164	This study	Grasslands	Cold	Cold_Grasslands	3	unknown	31.6985	100.18	3747	3.73333	0.5849	651	6.69	42.2643	3.7	0.700715	3.72105	60.316
P1831	1831	F733-R1083	2	B165	This study	Grasslands	Cold	Cold_Grasslands	3	unknown	31.6985	100.18	3747	3.73333	0.5849	651	6.3	42.8016	4.5	0.98741	6.09682	43.3473
P1832	1832	F733-R1083	2	B166	This study	Grasslands	Cold	Cold_Grasslands	3	unknown	31.6985	100.18	3747	3.73333	0.5849	651	6.2	48.4959	4.1	0.996786	2.09053	48.6522
P1833	1833	F733-R1083	2	B167	This study	Grasslands	Cold	Cold_Grasslands	3	unknown	31.6118	100.179	3983	2.50833	0.599	639	5.54	35.8936	2.5	0.977796	4.30092	36.7086
P1834	1834	F733-R1083	2	B168	This study	Grasslands	Cold	Cold_Grasslands	3	unknown	31.6118	100.179	3983	2.50833	0.599	639	5.55	27.4966	2.5	0.819582	0.579827	33.5495
P1835	1835	F733-R1083	2	B169	This study	Grasslands	Cold	Cold_Grasslands	3	unknown	31.6118	100.179	3983	2.50833	0.599	639	6.03	39.5861	3	1.0685	3.68551	37.0482
P1836	1836	F733-R1083	2	B170	This study	Grasslands	Cold	Cold_Grasslands	3	unknown	31.6118	100.179	3983	2.50833	0.599	639	5.51	51.7343	3.1	1.13775	5.82028	45.4705
P1837	1837	F733-R1083	2	B172	This study	Grasslands	Cold	Cold_Grasslands	3	unknown	31.7581	99.5418	4057	1.69583	0.6495	624	5.9	97.8321	9.8	1.92665	3.85837	50.7783
P1838	1838	F733-R1083	2	B173	This study	Grasslands	Cold	Cold_Grasslands	3	unknown	31.7581	99.5418	4057	1.69583	0.6495	624	4.68	85.4401	7	1.17476	5.58604	72.7302
P1839	1839	F733-R1083	2	B174	This study	Grasslands	Cold	Cold_Grasslands	3	unknown	31.7581	99.5418	4057	1.69583	0.6495	624	5.49	63.1378	3.9	0.922812	14.5588	68.4189
P1840	1840	F733-R1083	2	B175	This study	Grasslands	Cold	Cold_Grasslands	3	unknown	31.7581	99.5418	4057	1.69583	0.6495	624	5.45	79.4975	7.2	1.2574	8.82653	63.2235
P1841	1841	F733-R1083	2	B176	This study	Grasslands	Cold	Cold_Grasslands	3	unknown	31.6914	99.6459	3760	3.79583	0.5629	622	5.62	54.7997	3.1	0.766138	8.25473	71.5272
P1842	1842	F733-R1083	2	B177	This study	Grasslands	Cold	Cold_Grasslands	3	unknown	31.6914	99.6459	3760	3.79583	0.5629	622	5.88	65.3118	4.6	0.606655	9.30401	107.659
P1843	1843	F733-R1083	2	B178	This study	Grasslands	Cold	Cold_Grasslands	3	unknown	31.6914	99.6459	3760	3.79583	0.5629	622	5.68	51.7468	5.7	0.693594	8.05631	74.6067
P1844	1844	F733-R1083	2	B179	This study	Grasslands	Cold	Cold_Grasslands	3	unknown	31.6914	99.6459	3760	3.79583	0.5629	622	5.55	14.9609	4.3	0.62609	13.2136	23.8958
P1845	1845	F733-R1083	2	B180	This study	Grasslands	Cold	Cold_Grasslands	3	unknown	31.6914	99.6459	3760	3.79583	0.5629	622	5.72	17.407	3.3	0.67629	1.03955	25.7389
P1846	1846	F733-R1083	2	B181	This study	Grasslands	Cold	Cold_Grasslands	3	unknown	31.5691	99.9709	3658	4.58333	0.5584	644	5.54	12.4572	6.1	0.902465	6.85171	13.8036
P1847	1847	F733-R1083	2	B182	This study	Grasslands	Cold	Cold_Grasslands	3	unknown	31.5691	99.9709	3658	4.58333	0.5584	644	5.77	37.992	4.7	0.855412	8.09526	44.4137
P1848	1848	F733-R1083	2	B183	This study	Grasslands	Cold	Cold_Grasslands	3	unknown	31.5691	99.9709	3658	4.58333	0.5584	644	5.62	54.8989	6.6	0.934066	9.7403	58.7741
P1849	1849	F733-R1083	2	B184	This study	Grasslands	Cold	Cold_Grasslands	3	unknown	31.5691	99.9709	3658	4.58333	0.5584	644	5.87	82.1036	7.4	0.968229	10.0274	84.7977
P1850	1850	F733-R1083	2	B185	This study	Grasslands	Cold	Cold_Grasslands	3	unknown	31.5691	99.9709	3658	4.58333	0.5584	644	5.9	46.8085	4.8	0.946953	5.50419	49.4306
P1851	1851	F733-R1083	2	B186	This study	Grasslands	Cold	Cold_Grasslands	3	unknown	31.0046	99.6797	4193	1.74583	0.6038	608	5.93	76.5478	10.6	1.75473	15.8875	43.6237
P1852	1852	F733-R1083	2	B187	This study	Grasslands	Cold	Cold_Grasslands	3	unknown	31.0046	99.6797	4193	1.74583	0.6038	608	5.82	92.5285	8.2	1.43907	9.02832	64.2974
P1853	1853	F733-R1083	2	B188	This study	Grasslands	Cold	Cold_Grasslands	3	unknown	31.0046	99.6797	4193	1.74583	0.6038	608	5.46	48.8889	5.6	1.09398	5.86187	44.689
P1854	1854	F733-R1083	2	B189	This study	Grasslands	Cold	Cold_Grasslands	3	unknown	31.0046	99.6797	4193	1.74583	0.6038	608	5.28	60.199	6.2	1.34429	10.8942	44.7814
P1855	1855	F733-R1083	2	B190	This study	Grasslands	Cold	Cold_Grasslands	3	unknown	31.0046	99.6797	4193	1.74583	0.6038	608	5.69	51.5625	7.5	1.37845	12.6757	37.4061
P1856	1856	F733-R1083	2	B191	This study	Grasslands	Cold	Cold_Grasslands	3	unknown	31.0275	99.7307	4266	1.27083	0.6425	620	5.45	59.5326	17.9	1.06737	7.46116	55.7749
P1857	1857	F733-R1083	2	B192	This study	Grasslands	Cold	Cold_Grasslands	3	unknown	31.0275	99.7307	4266	1.27083	0.6425	620	5.62	57.4627	6.9	1.37435	7.70024	41.8108
P1858	1858	F733-R1083	2	B193	This study	Grasslands	Cold	Cold_Grasslands	3	unknown	31.0275	99.7307	4266	1.27083	0.6425	620	5.41	61.1111	5.7	0.751297	3.3303	81.3408
P1859	1859	F733-R1083	2	B194	This study	Grasslands	Cold	Cold_Grasslands	3	unknown	31.0275	99.7307	4266	1.27083	0.6425	620	5.25	62.5323	7.4	0.938325	10.458	66.6425
P1860	1860	F733-R1083	2	B195	This study	Grasslands	Cold	Cold_Grasslands	3	unknown	30.771	101.364	3913	2.51667	0.7188	680	5.35	47.6965	5.6	1.22139	12.2538	39.0509
P1861	1861	F733-R1083	2	B196	This study	Grasslands	Cold	Cold_Grasslands	3	unknown	30.771	101.364	3913	2.51667	0.7188	680	5.24	58.9023	5.5	1.0887	7.82875	54.1034
P1862	1862	F733-R1083	2	B197	This study	Grasslands	Cold	Cold_Grasslands	3	unknown	30.771	101.364	3913	2.51667	0.7188	680	5.46	114.1	4.3	1.34199	7.19418	85.0229
P1863	1863	F733-R1083	2	B198	This study	Grasslands	Cold	Cold_Grasslands	3	unknown	30.771	101.364	3913	2.51667	0.7188	680	5.1	62.3482	4.8	0.948998	3.78907	65.699
P1864	1864	F733-R1083	2	B199	This study	Grasslands	Cold	Cold_Grasslands	3	unknown	30.771	101.364	3913	2.51667	0.7188	680	5.18	28.9575	5	0.798325	8.22693	36.2729
P1865	1865	F733-R1083	2	B200	This study	Grasslands	Cold	Cold_Grasslands	3	unknown	30.7236	101.36	3789	3.03333	0.7036	672	5.22	52.9046	6.3	0.777079	13.5766	68.0813
P1866	1866	F733-R1083	2	B201	This study	Grasslands	Cold	Cold_Grasslands	3	unknown	30.7236	101.36	3789	3.03333	0.7036	672	5.62	50.5952	9.4	1.22148	19.8778	41.4212
P1867	1867	F733-R1083	2	B202	This study	Grasslands	Cold	Cold_Grasslands	3	unknown	30.7236	101.36	3789	3.03333	0.7036	672	5.25	56.962	5.7	1.30455	5.73111	43.664
P1868	1868	F733-R1083	2	B203	This study	Grasslands	Cold	Cold_Grasslands	3	unknown	30.7236	101.36	3789	3.03333	0.7036	672	5.45	60.7287	7	1.26271	12.3816	48.094
P1869	1869	F733-R1083	2	B204	This study	Grasslands	Cold	Cold_Grasslands	3	unknown	30.7236	101.36	3789	3.03333	0.7036	672	5.52	122.995	5.7	1.06753	7.03178	115.214
P1870	1870	F733-R1083	2	B205	This study	Grasslands	Cold	Cold_Grasslands	3	unknown	30.7402	101.334	3857	2.7	0.7141	673	5.25	62.5136	5.5	0.966206	4.47196	64.7
P1871	1871	F733-R1083	2	B206	This study	Grasslands	Cold	Cold_Grasslands	3	unknown	30.7402	101.334	3857	2.7	0.7141	673	5.28	77.1061	8	1.21794	11.4964	63.3088
P1872	1872	F733-R1083	2	B207	This study	Grasslands	Cold	Cold_Grasslands	3	unknown	30.7402	101.334	3857	2.7	0.7141	673	5.48	68.1994	7.5	2.1959	11.1441	31.0576
P1873	1873	F733-R1083	2	B208	This study	Grasslands	Cold	Cold_Grasslands	3	unknown	30.7402	101.334	3857	2.7	0.7141	673	5.56	65.5462	7.3	0.954776	9.30074	68.6509
P1874	1874	F733-R1083	2	B209	This study	Grasslands	Cold	Cold_Grasslands	3	unknown	30.8283	101.281	3619	3.9375	0.6606	659	5.98	48.6586	3.4	0.813697	3.64713	59.7994
P1875	1875	F733-R1083	2	B210	This study	Grasslands	Cold	Cold_Grasslands	3	unknown	30.8283	101.281	3619	3.9375	0.6606	659	5.78	55.2632	5.5	0.966688	4.9531	57.1675
P1876	1876	F733-R1083	2	B211	This study	Grasslands	Cold	Cold_Grasslands	3	unknown	30.8283	101.281	3619	3.9375	0.6606	659	5.91	79.7661	9.8	1.09876	6.71948	72.5966
P1877	1877	F733-R1083	2	B212	This study	Grasslands	Cold	Cold_Grasslands	3	unknown	30.8283	101.281	3619	3.9375	0.6606	659	5.96	61.8093	5.8	1.01078	8.03044	61.1502
P1878	1878	F733-R1083	2	B213	This study	Grasslands	Cold	Cold_Grasslands	3	unknown	30.8283	101.281	3619	3.9375	0.6606	659	5.72	39.3247	3.7	1.0913	10.7419	36.0348
P1879	1879	F733-R1083	2	B214	This study	Grasslands	Polar	Polar	6	unknown	32.1868	100.254	4171	0.254167	0.7238	680	5.6	45.6925	5.8	1.09615	5.99729	41.6847
P1880	1880	F733-R1083	2	B215	This study	Grasslands	Polar	Polar	6	unknown	32.1868	100.254	4171	0.254167	0.7238	680	5.5	63.3795	5.4	0.955336	20.5594	66.3426
P1881	1881	F733-R1083	2	B216	This study	Grasslands	Polar	Polar	6	unknown	32.1868	100.254	4171	0.254167	0.7238	680	5.38	65.9239	6.9	1.32885	9.88643	49.6099
P1882	1882	F733-R1083	2	B217	This study	Grasslands	Polar	Polar	6	unknown	32.1868	100.254	4171	0.254167	0.7238	680	5.49	59.2411	5.5	1.2508	7.9925	47.3626
P1883	1883	F733-R1083	2	B218	This study	Grasslands	Cold	Cold_Grasslands	3	unknown	32.1572	100.291	4007	1.12917	0.6741	672	6.4	56.254	4.4	0.820213	2.20748	68.5846
P1884	1884	F733-R1083	2	B219	This study	Grasslands	Cold	Cold_Grasslands	3	unknown	32.1572	100.291	4007	1.12917	0.6741	672	6.18	38.7203	4.6	0.765397	5.72629	50.5885
P1885	1885	F733-R1083	2	B220	This study	Grasslands	Cold	Cold_Grasslands	3	unknown	32.1572	100.291	4007	1.12917	0.6741	672	6.22	46.2306	4.9	0.651195	7.35197	70.9935
P1886	1886	F733-R1083	2	B221	This study	Grasslands	Cold	Cold_Grasslands	3	unknown	32.1572	100.291	4007	1.12917	0.6741	672	6.34	57.8223	5.7	0.747222	8.29705	77.383
P1887	1887	F733-R1083	2	B222	This study	Grasslands	Cold	Cold_Grasslands	3	unknown	32.1572	100.291	4007	1.12917	0.6741	672	6.05	62.5928	7.6	0.979039	9.6316	63.9329
P1888	1888	F733-R1083	2	B223	This study	Grasslands	Polar	Polar	6	unknown	32.2117	100.185	4179	0.183333	0.7209	674	5.92	66.8806	8.4	1.21112	17.9381	55.222
P1889	1889	F733-R1083	2	B224	This study	Grasslands	Polar	Polar	6	unknown	32.2117	100.185	4179	0.183333	0.7209	674	5.95	60.5372	7	1.18901	10.233	50.9142
P1890	1890	F733-R1083	2	B225	This study	Grasslands	Polar	Polar	6	unknown	32.2117	100.185	4179	0.183333	0.7209	674	5.71	80.0626	8	1.14899	12.2292	69.6806
P1891	1891	F733-R1083	2	B226	This study	Grasslands	Polar	Polar	6	unknown	32.2117	100.185	4179	0.183333	0.7209	674	5.95	84.2986	10.7	0.819141	10.3122	102.911
P1892	1892	F733-R1083	2	B227	This study	Grasslands	Polar	Polar	6	unknown	32.2117	100.185	4179	0.183333	0.7209	674	5.83	96.1098	8.7	1.29265	7.20596	74.3509
P1893	1893	F733-R1083	2	B228	This study	Grasslands	Polar	Polar	6	unknown	32.5725	100.494	3892	0.258333	0.7613	709	5.15	43.5338	9.2	1.34513	10.594	32.364
P1894	1894	F733-R1083	2	B229	This study	Grasslands	Polar	Polar	6	unknown	32.5725	100.494	3892	0.258333	0.7613	709	5.98	75.3683	13.8	1.55029	40.1425	48.6155
P1895	1895	F733-R1083	2	B230	This study	Grasslands	Polar	Polar	6	unknown	32.5725	100.494	3892	0.258333	0.7613	709	5.45	63.744	8.7	1.29056	11.8944	49.3927
P1896	1896	F733-R1083	2	B231	This study	Grasslands	Polar	Polar	6	unknown	32.5725	100.494	3892	0.258333	0.7613	709	5.26	68.2659	10	1.24259	13.3275	54.9383
P1897	1897	F733-R1083	2	B232	This study	Grasslands	Polar	Polar	6	unknown	32.5725	100.494	3892	0.258333	0.7613	709	5.4	74.0367	10.6	1.13359	12.4065	65.3117
P1898	1898	F733-R1083	2	B233	This study	Grasslands	Polar	Polar	6	unknown	32.5401	100.41	4236	-1.41667	0.849	710	5.73	77.3052	10.5	1.57706	14.3468	49.0185
P1899	1899	F733-R1083	2	B234	This study	Grasslands	Polar	Polar	6	unknown	32.5401	100.41	4236	-1.41667	0.849	710	5.9	91.9453	15.3	1.46147	19.7401	62.9129
P1900	1900	F733-R1083	2	B235	This study	Grasslands	Polar	Polar	6	unknown	32.5401	100.41	4236	-1.41667	0.849	710	6.03	233.095	25.7	2.33122	45.6676	99.9884
P1901	1901	F733-R1083	2	B236	This study	Grasslands	Polar	Polar	6	unknown	32.5401	100.41	4236	-1.41667	0.849	710	6.27	104.019	13.9	1.75982	17.9368	59.1078
P1902	1902	F733-R1083	2	B237	This study	Grasslands	Polar	Polar	6	unknown	32.5401	100.41	4236	-1.41667	0.849	710	5.95	107.625	12.9	1.63951	23.284	65.645
P1903	1903	F733-R1083	2	B238	This study	Grasslands	Polar	Polar	6	unknown	32.4399	100.399	4369	-1.8375	0.866	705	5.59	86.6824	11.9	1.58844	12.6064	54.5707
P1904	1904	F733-R1083	2	B239	This study	Grasslands	Polar	Polar	6	unknown	32.4399	100.399	4369	-1.8375	0.866	705	5.92	124.186	16.3	1.85063	28.0328	67.1047
P1905	1905	F733-R1083	2	B241	This study	Grasslands	Polar	Polar	6	unknown	32.4399	100.399	4369	-1.8375	0.866	705	5.79	105.39	14.1	1.82667	23.7084	57.6953
P1906	1906	F733-R1083	2	B242	This study	Grasslands	Polar	Polar	6	unknown	32.4399	100.399	4369	-1.8375	0.866	705	5.59	99.4898	13.4	1.81275	22.1686	54.8833
P1907	1907	F733-R1083	2	B243	This study	Grasslands	Polar	Polar	6	unknown	32.0242	100.47	4056	0.716667	0.7451	691	5.23	80.1749	9.7	1.29954	9.72913	61.6949
P1908	1908	F733-R1083	2	B244	This study	Grasslands	Polar	Polar	6	unknown	32.0242	100.47	4056	0.716667	0.7451	691	5.59	84.4373	9	1.29913	11.0379	64.9953
P1909	1909	F733-R1083	2	B245	This study	Grasslands	Polar	Polar	6	unknown	32.0242	100.47	4056	0.716667	0.7451	691	5.39	79.4527	5.3	1.14183	7.98962	69.5835
P1910	1910	F733-R1083	2	B247	This study	Grasslands	Polar	Polar	6	unknown	32.0242	100.47	4056	0.716667	0.7451	691	5.45	94.988	11.7	1.18334	12.6882	80.2713
P1911	1911	F733-R1083	2	B248	This study	Grasslands	Polar	Polar	6	unknown	32.1676	100.508	4085	0.654167	0.7165	688	5.9	93.4955	11.4	1.50459	14.6093	62.14
P1912	1912	F733-R1083	2	B249	This study	Grasslands	Polar	Polar	6	unknown	32.1676	100.508	4085	0.654167	0.7165	688	6.62	102.857	12.7	1.28263	12.2523	80.1921
P1913	1913	F733-R1083	2	B250	This study	Grasslands	Polar	Polar	6	unknown	32.1676	100.508	4085	0.654167	0.7165	688	5.82	65.4383	9.3	1.40886	11.7261	46.4476
P1914	1914	F733-R1083	2	B251	This study	Grasslands	Polar	Polar	6	unknown	32.1676	100.508	4085	0.654167	0.7165	688	6.09	90.1297	12.1	1.49947	13.6741	60.1078
P1915	1915	F733-R1083	2	B252	This study	Grasslands	Polar	Polar	6	unknown	32.1676	100.508	4085	0.654167	0.7165	688	6.3	117.234	16.1	1.41455	12.9057	82.8767
P1916	1916	F733-R1083	2	B253	This study	Grasslands	Cold	Cold_Grasslands	3	unknown	32.1412	100.389	3926	1.62083	0.6597	676	5.97	83.5692	10.4	1.97323	28.5118	42.3516
P1917	1917	F733-R1083	2	B254	This study	Grasslands	Cold	Cold_Grasslands	3	unknown	32.1412	100.389	3926	1.62083	0.6597	676	6.26	60.3459	9.9	1.91191	26.6178	31.5632
P1918	1918	F733-R1083	2	B255	This study	Grasslands	Cold	Cold_Grasslands	3	unknown	32.1412	100.389	3926	1.62083	0.6597	676	5.93	72.7874	9.6	1.52048	13.1169	47.8713
P1919	1919	F733-R1083	2	B256	This study	Grasslands	Cold	Cold_Grasslands	3	unknown	32.1412	100.389	3926	1.62083	0.6597	676	5.98	52.2624	7.5	1.32999	10.0249	39.2952
P1920	1920	F733-R1083	2	B257	This study	Grasslands	Cold	Cold_Grasslands	3	unknown	32.1412	100.389	3926	1.62083	0.6597	676	6.17	61.7827	7.1	1.40639	13.7408	43.9299
P1921	1921	F733-R1083	2	Q1-G19-1	This study	Grasslands	Polar	Polar	6	unknown	28.4749	86.1609	4679	1.33333	0.3586	399	8.03	14.8671	0.9311	0.477724	1.70102	31.1206
P1922	1922	F733-R1083	2	Q2-G19-2	This study	Grasslands	Polar	Polar	6	unknown	28.4749	86.1609	4679	1.33333	0.3586	399	8.18	8.13377	1.46562	0.424755	0.691942	19.1493
P1923	1923	F733-R1083	2	Q3-G19-3	This study	Grasslands	Polar	Polar	6	unknown	28.4749	86.1609	4679	1.33333	0.3586	399	8.24	14.8882	0.310646	0.475253	1.70102	31.327
P1924	1924	F733-R1083	2	Q4-G20-1	This study	Grasslands	Polar	Polar	6	unknown	28.4657	86.6196	4501	2.64167	0.3857	444	7.74	3.3687	0.652655	0.350045	1.84518	9.62363
P1925	1925	F733-R1083	2	Q5-G20-2	This study	Grasslands	Polar	Polar	6	unknown	28.4657	86.6196	4501	2.64167	0.3857	444	7.68	3.19349	0.85547	0.400278	2.13349	7.97818
P1926	1926	F733-R1083	2	Q6-G20-3	This study	Grasslands	Polar	Polar	6	unknown	28.4657	86.6196	4501	2.64167	0.3857	444	7.59	3.69053	0.479103	0.296085	1.26856	12.4644
P1927	1927	F733-R1083	2	Q7-G21-1	This study	Grasslands	Polar	Polar	6	unknown	28.4946	87.4573	4178	4.36667	0.4351	546	8.32	7.87687	0.900891	0.41932	4.29581	18.7849
P1928	1928	F733-R1083	2	Q8-G21-2	This study	Grasslands	Polar	Polar	6	unknown	28.4946	87.4573	4178	4.36667	0.4351	546	8.57	9.44967	1.08375	0.455329	2.13349	20.7535
P1929	1929	F733-R1083	2	Q9-G21-3	This study	Grasslands	Polar	Polar	6	unknown	28.4946	87.4573	4178	4.36667	0.4351	546	8.36	6.57748	1.24328	0.560728	1.98933	11.7302
P1930	1930	F733-R1083	2	Q10-G22-1	This study	Grasslands	Cold	Cold_Grasslands	3	unknown	28.482	87.7007	4214	3.89583	0.3971	501	8.99	5.88964	0.287897	0.455155	0.115324	12.9399
P1931	1931	F733-R1083	2	Q11-G22-2	This study	Grasslands	Cold	Cold_Grasslands	3	unknown	28.482	87.7007	4214	3.89583	0.3971	501	9.32	4.87122	0.229867	0.411348	0.691942	11.8421
P1932	1932	F733-R1083	2	Q12-G22-3	This study	Grasslands	Cold	Cold_Grasslands	3	unknown	28.482	87.7007	4214	3.89583	0.3971	501	9.59	4.92181	0.17568	0.323983	0.547787	15.1916
P1933	1933	F733-R1083	2	Q13-G49-1	This study	Grasslands	Polar	Polar	6	unknown	28.9217	85.3396	4452	3.08333	0.3167	357	9.04	14.3536	0.286438	0.549089	4.29581	26.1408
P1934	1934	F733-R1083	2	Q14-G49-2	This study	Grasslands	Polar	Polar	6	unknown	28.9217	85.3396	4452	3.08333	0.3167	357	9.05	10.8083	0.252082	0.67458	5.73735	16.0223
P1935	1935	F733-R1083	2	Q15-G49-3	This study	Grasslands	Polar	Polar	6	unknown	28.9217	85.3396	4452	3.08333	0.3167	357	8.91	18.1353	1.45674	0.397544	0.115324	45.6182
P1936	1936	F733-R1083	2	Q16-G50-1	This study	Grasslands	Polar	Polar	6	unknown	28.6796	85.8265	4687	1.72083	0.3388	365	8.22	2.08856	0.992454	0.421172	1.98933	4.95894
P1937	1937	F733-R1083	2	Q17-G50-2	This study	Grasslands	Polar	Polar	6	unknown	28.6796	85.8265	4687	1.72083	0.3388	365	7.25	4.97113	0.458748	0.452313	2.77262	10.9905
P1938	1938	F733-R1083	2	Q18-G50-3	This study	Grasslands	Polar	Polar	6	unknown	28.6796	85.8265	4687	1.72083	0.3388	365	7.21	3.25825	0.431803	0.414278	0.914678	7.86489
P1939	1939	F733-R1083	2	Q19-G51-1	This study	Grasslands	Polar	Polar	6	unknown	28.6929	86.3901	4384	3.6	0.3577	418	9.04	7.35631	0.464684	0.156966	1.48635	46.8657
P1940	1940	F733-R1083	2	Q20-G51-2	This study	Grasslands	Polar	Polar	6	unknown	28.6929	86.3901	4384	3.6	0.3577	418	9.09	3.20113	0.380374	0.131345	1.91511	24.372
P1941	1941	F733-R1083	2	Q21-G51-3	This study	Grasslands	Polar	Polar	6	unknown	28.6929	86.3901	4384	3.6	0.3577	418	9.2	3.19114	1.15487	0.111563	1.34343	28.6039
P1942	1942	F733-R1083	2	Q22-G52-1	This study	Grasslands	Polar	Polar	6	unknown	28.5916	86.8748	4316	4.14167	0.4043	482	7.89	5.32431	0.89295	0.260517	0.485923	20.4375
P1943	1943	F733-R1083	2	Q23-G52-2	This study	Grasslands	Polar	Polar	6	unknown	28.5916	86.8748	4316	4.14167	0.4043	482	8.61	5.38237	0.461493	0.293966	2.77262	18.3095
P1944	1944	F733-R1083	2	Q26-G53-2	This study	Grasslands	Polar	Polar	6	unknown	28.6208	87.1513	4292	4.3	0.4003	489	8.89	1.84794	1.27102	0.360759	3.20137	5.12236
P1945	1945	F733-R1083	2	Q28-G54-1	This study	Grasslands	Polar	Polar	6	unknown	28.7365	87.8588	4412	1.84583	0.2994	376	7.33	13.2693	1.3879	0.368727	4.05888	35.9869
P1946	1946	F733-R1083	2	Q29-G54-2	This study	Grasslands	Polar	Polar	6	unknown	28.7365	87.8588	4412	1.84583	0.2994	376	7.45	11.6346	1.75156	0.400462	3.91596	29.053
P1947	1947	F733-R1083	2	Q30-G54-3	This study	Grasslands	Polar	Polar	6	unknown	28.7365	87.8588	4412	1.84583	0.2994	376	7.57	7.23565	1.67958	0.402038	2.48678	17.9974
P1948	1948	F733-R1083	2	Q31-G84-1	This study	Grasslands	Polar	Polar	6	unknown	29.4786	84.0313	4567	2.325	0.3117	333	8.75	4.78749	0.421888	0.32951	2.91554	14.5291
P1949	1949	F733-R1083	2	Q32-G84-2	This study	Grasslands	Polar	Polar	6	unknown	29.4786	84.0313	4567	2.325	0.3117	333	8.67	10.5073	0.75214	0.351676	6.91725	29.8779
P1950	1950	F733-R1083	2	Q34-G85-1	This study	Grasslands	Polar	Polar	6	unknown	29.4907	84.9805	4541	2.75833	0.2418	274	7.55	16.9606	0.845498	0.361836	2.77262	46.8737
P1951	1951	F733-R1083	2	Q35-G85-2	This study	Grasslands	Polar	Polar	6	unknown	29.4907	84.9805	4541	2.75833	0.2418	274	7.4	6.16703	0.458543	0.380509	0.628841	16.2073
P1952	1952	F733-R1083	2	Q37-G86-1	This study	Grasslands	Polar	Polar	6	unknown	29.0455	85.4322	4711	1.35	0.2889	312	8.43	3.7011	1.00827	0.167278	2.91554	22.1254
P1953	1953	F733-R1083	2	Q38-G86-2	This study	Grasslands	Polar	Polar	6	unknown	29.0455	85.4322	4711	1.35	0.2889	312	8.51	7.19135	1.07519	0.164394	7.77476	43.7446
P1954	1954	F733-R1083	2	Q39-G86-3	This study	Grasslands	Polar	Polar	6	unknown	29.0455	85.4322	4711	1.35	0.2889	312	8.55	17.8544	0.995572	0.159543	1.48635	111.91
P1955	1955	F733-R1083	2	Q40-G87-1	This study	Grasslands	Polar	Polar	6	unknown	29.4008	85.5287	4713	1.25833	0.2362	263	7.99	10.9921	0.0869651	0.391129	3.20137	28.1036
P1956	1956	F733-R1083	2	Q41-G87-2	This study	Grasslands	Polar	Polar	6	unknown	29.4008	85.5287	4713	1.25833	0.2362	263	7.93	6.70159	0.816348	0.483325	2.77262	13.8656
P1957	1957	F733-R1083	2	Q42-G87-3	This study	Grasslands	Polar	Polar	6	unknown	29.4008	85.5287	4713	1.25833	0.2362	263	7.64	5.65153	1.08791	0.407695	12.3481	13.8621
P1958	1958	F733-R1083	2	Q43-G88-1	This study	Grasslands	Polar	Polar	6	unknown	29.4582	86.1344	4879	0.470833	0.2172	241	7.23	9.30478	1.38014	0.432081	2.75686	21.5348
P1959	1959	F733-R1083	2	Q44-G88-2	This study	Grasslands	Polar	Polar	6	unknown	29.4582	86.1344	4879	0.470833	0.2172	241	7.28	8.12514	1.67925	0.461074	2.47264	17.6222
P1960	1960	F733-R1083	2	Q45-G88-3	This study	Grasslands	Polar	Polar	6	unknown	29.4582	86.1344	4879	0.470833	0.2172	241	7.31	11.7485	1.5486	0.64646	2.75686	18.1735
P1961	1961	F733-R1083	2	Q46-G89-1	This study	Grasslands	Arid	Arid_Grasslands	2	unknown	29.3854	86.85	4594	2.28333	0.2428	291	7.15	7.69051	1.37776	0.46639	0.909478	16.4894
P1962	1962	F733-R1083	2	Q47-G89-2	This study	Grasslands	Arid	Arid_Grasslands	2	unknown	29.3854	86.85	4594	2.28333	0.2428	291	7.7	6.61307	1.13931	0.319601	1.05158	20.6916
P1963	1963	F733-R1083	2	Q48-G89-3	This study	Grasslands	Arid	Arid_Grasslands	2	unknown	29.3854	86.85	4594	2.28333	0.2428	291	7.13	7.85224	0.966527	0.448203	1.4779	17.5194
P1964	1964	F733-R1083	2	Q52-G91-1	This study	Grasslands	Polar	Polar	6	unknown	29.6348	87.6623	4104	4.53333	0.3005	412	8.91	1.32961	0.187703	0.27505	0.48316	4.83406
P1965	1965	F733-R1083	2	Q53-G91-2	This study	Grasslands	Polar	Polar	6	unknown	29.6348	87.6623	4104	4.53333	0.3005	412	8.99	0.766428	0.161409	0.331108	0.198948	2.31474
P1966	1966	F733-R1083	2	Q54-G91-3	This study	Grasslands	Polar	Polar	6	unknown	29.6348	87.6623	4104	4.53333	0.3005	412	6.39	0.536803	0.191361	0.284969	1.90422	1.88372
P1967	1967	F733-R1083	2	Q55-G120-1	This study	Grasslands	Polar	Polar	6	unknown	29.9691	83.3909	4620	1.54583	0.2893	298	8.43	1.98726	0.348238	0.451359	2.18843	4.40283
P1968	1968	F733-R1083	2	Q56-G120-2	This study	Grasslands	Polar	Polar	6	unknown	29.9691	83.3909	4620	1.54583	0.2893	298	8.21	2.27612	0.233333	0.475672	2.75686	4.78507
P1969	1969	F733-R1083	2	Q57-G120-3	This study	Grasslands	Polar	Polar	6	unknown	29.9691	83.3909	4620	1.54583	0.2893	298	8.58	1.96113	0.159107	0.425386	3.7516	4.61023
P1970	1970	F733-R1083	2	Q58-G121-1	This study	Grasslands	Polar	Polar	6	unknown	29.7713	83.9268	4620	1.97083	0.2682	286	7.64	2.63285	0.246255	0.246301	3.32528	10.6895
P1971	1971	F733-R1083	2	Q59-G121-2	This study	Grasslands	Polar	Polar	6	unknown	29.7713	83.9268	4620	1.97083	0.2682	286	7.61	1.15578	0.188741	0.235015	5.03055	4.91789
P1972	1972	F733-R1083	2	Q60-G121-3	This study	Grasslands	Polar	Polar	6	unknown	29.7713	83.9268	4620	1.97083	0.2682	286	7.51	0.744462	0.33682	0.329118	5.17266	2.26199
P1973	1973	F733-R1083	2	Q61-G122-1	This study	Grasslands	Polar	Polar	6	unknown	29.5985	84.4158	4647	2.31667	0.2589	278	7.08	4.6478	0.5556	0.248226	3.60949	18.724
P1974	1974	F733-R1083	2	Q63-G122-3	This study	Grasslands	Polar	Polar	6	unknown	29.5985	84.4158	4647	2.31667	0.2589	278	7.15	4.59775	0.894732	0.262746	4.03581	17.4988
P1975	1975	F733-R1083	2	Q64-G125-1	This study	Grasslands	Polar	Polar	6	unknown	29.7496	85.7311	5183	-1.89167	0.2045	197	7.07	13.1304	2.34455	0.662488	4.17792	19.8199
P1976	1976	F733-R1083	2	Q65-G125-2	This study	Grasslands	Polar	Polar	6	unknown	29.7496	85.7311	5183	-1.89167	0.2045	197	7.05	17.2974	2.17724	0.709917	0.625266	24.3654
P1977	1977	F733-R1083	2	Q66-G125-3	This study	Grasslands	Polar	Polar	6	unknown	29.7496	85.7311	5183	-1.89167	0.2045	197	7.09	13.5884	1.83456	0.573046	1.05158	23.7125
P1978	1978	F733-R1083	2	Q68-G123-2	This study	Grasslands	Polar	Polar	6	unknown	29.5861	84.7728	4640	1.87083	0.2356	263	8.82	0.825868	0.219338	0.335624	0.341054	2.46069
P1979	1979	F733-R1083	2	Q69-G123-3	This study	Grasslands	Polar	Polar	6	unknown	29.5861	84.7728	4640	1.87083	0.2356	263	8.88	0.972174	0.275825	0.322315	2.47264	3.01622
P1980	1980	F733-R1083	2	Q70-G126-1	This study	Grasslands	Cold	Cold_Grasslands	3	unknown	29.5467	86.3128	5004	-0.345833	0.203	222	7.07	6.85948	0.658799	0.325155	2.89896	21.096
P1981	1981	F733-R1083	2	Q71-G126-2	This study	Grasslands	Cold	Cold_Grasslands	3	unknown	29.5467	86.3128	5004	-0.345833	0.203	222	6.88	5.16905	0.596378	0.305248	0.625266	16.9339
P1982	1982	F733-R1083	2	Q72-G126-3	This study	Grasslands	Cold	Cold_Grasslands	3	unknown	29.5467	86.3128	5004	-0.345833	0.203	222	6.79	5.68163	0.658865	0.262269	0.767372	21.6633
P1983	1983	F733-R1083	2	Q73-G127-1	This study	Grasslands	Polar	Polar	6	unknown	29.5887	86.6716	4786	0.5375	0.209	242	6.58	5.49392	0.645509	0.248388	5.63098	22.1183
P1984	1984	F733-R1083	2	Q74-G127-2	This study	Grasslands	Polar	Polar	6	unknown	29.5887	86.6716	4786	0.5375	0.209	242	6.43	7.95443	0.87945	0.251135	9.91854	31.6739
P1985	1985	F733-R1083	2	Q75-G127-3	This study	Grasslands	Polar	Polar	6	unknown	29.5887	86.6716	4786	0.5375	0.209	242	6.57	6.84723	0.778152	0.277426	10.0615	24.6813
P1986	1986	F733-R1083	2	Q77-G128-2	This study	Grasslands	Polar	Polar	6	unknown	29.8513	87.4644	4583	1.53333	0.2308	288	6.59	8.01768	1.09583	0.26908	6.63141	29.7967
P1987	1987	F733-R1083	2	Q79-G129-1	This study	Grasslands	Cold	Cold_Grasslands	3	unknown	29.4359	87.7986	4015	5.2	0.3382	451	7.64	1.64313	0.436288	0.38204	5.63098	4.30093
P1988	1988	F733-R1083	2	Q80-G129-2	This study	Grasslands	Cold	Cold_Grasslands	3	unknown	29.4359	87.7986	4015	5.2	0.3382	451	8.17	1.23471	0.333498	0.458085	1.62927	2.69538
P1989	1989	F733-R1083	2	Q81-G129-3	This study	Grasslands	Cold	Cold_Grasslands	3	unknown	29.4359	87.7986	4015	5.2	0.3382	451	7.72	2.43751	0.348272	0.435512	1.48635	5.59688
P1990	1990	F733-R1083	2	Q82-G158-1	This study	Grasslands	Polar	Polar	6	unknown	30.3794	81.1538	4295	2	0.7022	731	7.53	8.40414	0.826576	0.481949	5.48807	17.4378
P1991	1991	F733-R1083	2	Q84-G158-3	This study	Grasslands	Polar	Polar	6	unknown	30.3794	81.1538	4295	2	0.7022	731	7.8	6.64208	0.83556	0.37462	10.0615	17.7302
P1992	1992	F733-R1083	2	Q85-G160-1	This study	Grasslands	Polar	Polar	6	unknown	30.2666	82.9562	4634	0.558333	0.2989	297	8.5	7.04981	0.97351	0.578687	8.75991	12.1824
P1993	1993	F733-R1083	2	Q86-G160-2	This study	Grasslands	Polar	Polar	6	unknown	30.2666	82.9562	4634	0.558333	0.2989	297	8.24	7.4822	1.04006	0.703902	7.81943	10.6296
P1994	1994	F733-R1083	2	Q87-G160-3	This study	Grasslands	Polar	Polar	6	unknown	30.2666	82.9562	4634	0.558333	0.2989	297	8.42	7.14057	0.785163	0.640355	6.47588	11.151
P1995	1995	F733-R1083	2	Q88-G161-1	This study	Grasslands	Polar	Polar	6	unknown	30.0843	83.4126	4599	1.6875	0.2602	278	7.96	1.00447	0.262526	0.350996	5.40105	2.86178
P1996	1996	F733-R1083	2	Q89-G161-2	This study	Grasslands	Polar	Polar	6	unknown	30.0843	83.4126	4599	1.6875	0.2602	278	7.75	2.26159	1.01143	0.247469	6.07282	9.13891
P1997	1997	F733-R1083	2	Q90-G161-3	This study	Grasslands	Polar	Polar	6	unknown	30.0843	83.4126	4599	1.6875	0.2602	278	8.57	1.92481	0.455579	0.283344	5.93847	6.79319
P1998	1998	F733-R1083	2	Q91-G162-1	This study	Grasslands	Polar	Polar	6	unknown	30.1087	83.5244	4790	0.545833	0.2467	255	8.63	2.40515	0.28113	0.245285	4.46057	9.80555
P1999	1999	F733-R1083	2	Q92-G162-2	This study	Grasslands	Polar	Polar	6	unknown	30.1087	83.5244	4790	0.545833	0.2467	255	8.88	3.6034	0.145601	0.216972	3.92315	16.6077
[truncated: 1,177 more rows]

## Sheet: TableS3_Lists_of_domiant_OTUs
OTU_ID	Ubiquity	Randomforest_Rsq	Randomforest_best_predictor	Semi_partial_rho	Cluster	Genome_ID	Genome_Idendity	Genome_completeness	Kingdom	Phylum	Class	Order	Family	Genera	Species
e04a36fc22668ca1a7d55d06fcb0080ff4ed1f62	2.11024	23.89	AP	NA	NA	NA	NA	NA	Bacteria	Cyanobacteria		Nostocales			Nostocales cyanobacterium HT-58-2
dca5d8653c12d6af8ae41eb2945af853bb6a6097	4.91339	33.46	AP	-0.243916	AI_Low	NA	NA	NA	Bacteria	Cyanobacteria		Nostocales			Nostocales cyanobacterium HT-58-2
c0458c4da955570713e9256479e10f8148f595d1	2.77165	15.48	C:P	NA	NA	NA	NA	NA	unclassified	Unclassified	Unclassified	Unclassified	Unclassified	Unclassified	Unclassified
b53b9de19e3c9e09cc86be11cf83ce9137a3aee7	3.49606	18.16	MAT	NA	NA	NA	NA	NA	unclassified	Unclassified	Unclassified	Unclassified	Unclassified	Unclassified	Unclassified
b0d851e3c27137fe5f939480b22e2b792fe13e8e	4.97638	24.24	MAT	NA	NA	NA	NA	NA	Bacteria	Cyanobacteria		Nostocales			Nostocales cyanobacterium HT-58-2
a9c0068541003abb7c22fc022140fc856b83ebf9	4.0315	14.59	MAT	NA	NA	NA	NA	NA	Bacteria	Firmicutes	Bacilli	Bacillales	Paenibacillaceae	Aneurinibacillus	Aneurinibacillus sp. XH2
a6132ec6613addc4315a2f5ca11d3d0b7368d53f	4.88189	37.48	C:P	-0.207908	AI_Low	NA	NA	NA	Bacteria	Actinobacteria	Actinobacteria	Micrococcales	Dermacoccaceae	Luteipulveratus	Luteipulveratus halotolerans
a1ab7e0371955162a465667cc4c427c2a1598c6e	2.74016	12.8	TN	NA	NA	NA	NA	NA	unclassified	Unclassified	Unclassified	Unclassified	Unclassified	Unclassified	Unclassified
9af9bbc3e0bdcd3f02e837be76b97b69348d1f3b	2.20472	-2.28	TOC	NA	NA	NA	NA	NA	Bacteria	Cyanobacteria		Nostocales			Nostocales cyanobacterium HT-58-2
9866cb8a7764f92f817b6e4c2169fc4b7f96088f	2.07874	0.35	AP	NA	NA	NA	NA	NA	Bacteria	Cyanobacteria		Nostocales	Scytonemataceae	Scytonema	Scytonema sp. HK-05
945e5ac6b636720c28ac468820015c8c2e641170	2.07874	12.74	MAT	NA	NA	NA	NA	NA	unclassified	Unclassified	Unclassified	Unclassified	Unclassified	Unclassified	Unclassified
895826f5586d460533f2c2e2e3db0fbf77ffba7c	4.28346	15.93	AI	NA	NA	NA	NA	NA	Bacteria	Cyanobacteria		Nostocales	Scytonemataceae	Scytonema	Scytonema sp. HK-05
8027bd9230a8b8049e66838482559c6382b005f2	2.61417	15.85	TN	NA	NA	NA	NA	NA	Bacteria	Cyanobacteria		Nostocales	Aphanizomenonaceae	Chrysosporum	Chrysosporum ovalisporum
7f7c91d6ed009c8d8f08f0556669fbcf6c0d2f83	2.48819	18.38	pH	NA	NA	NA	NA	NA	unclassified	Unclassified	Unclassified	Unclassified	Unclassified	Unclassified	Unclassified
7ced63f2814d5f057da8d414f99279a9d4fa6b62	2.20472	31.94	AI	NA	NA	NA	NA	NA	unclassified	Unclassified	Unclassified	Unclassified	Unclassified	Unclassified	Unclassified
77d3f51b78a6637bdc5f43a1108a9a89d9305813	2.64567	11.06	AI	NA	NA	NA	NA	NA	Bacteria	Cyanobacteria		Nostocales			Nostocales cyanobacterium HT-58-2
76dfe849f6bcbbc9b51b9f7a0d4403a2aca960fa	2.4252	13.16	Ecosystem_types_group_order	NA	NA	NA	NA	NA	Bacteria	Firmicutes	Bacilli	Bacillales	Bacillaceae	Virgibacillus	Virgibacillus massiliensis
72648140008ed9c97e1608dbf60a54b8b73ca36d	2.26772	16.52	Ecosystem_types_group_order	NA	NA	NA	NA	NA	Bacteria	Actinobacteria	Actinobacteria	Micrococcales	Dermacoccaceae	Luteipulveratus	Luteipulveratus halotolerans
659c38e43e3def675a8b75f79bbdc0ee7742995d	2.3622	13.72	TN	NA	NA	NA	NA	NA	Bacteria	Cyanobacteria		Nostocales			Nostocales cyanobacterium HT-58-2
5fa512f6ea4228eea4a7015fb2f08257f83bb347	4.37795	18.25	MAT	NA	NA	NA	NA	NA	unclassified	Unclassified	Unclassified	Unclassified	Unclassified	Unclassified	Unclassified
5ce9f014e4e78a6286f78bdf2c1bee06f0fc30ce	5.16535	16.04	Ecosystem_types_group_order	NA	NA	NA	NA	NA	Bacteria	Cyanobacteria		Nostocales	Rivulariaceae	Calothrix	Calothrix sp. NIES-2098
51b6c2acd7e929a09ccac11f69950c55ee8c54e9	2.45669	13.16	AI	NA	NA	NA	NA	NA	unclassified	Unclassified	Unclassified	Unclassified	Unclassified	Unclassified	Unclassified
5062606478d25e41c91c2de832192762e7b8cb6e	6.14173	14.68	AI	NA	NA	NA	NA	NA	Bacteria	Cyanobacteria		Nostocales			Nostocales cyanobacterium HT-58-2
504dd307f1fc7ef7f7b667829785d9d920dd0eb6	2.14173	6.01	MAT	NA	NA	NA	NA	NA	Bacteria	Cyanobacteria		Nostocales	Scytonemataceae	Scytonema	Scytonema sp. NIES-4073
501985bc0d8be871890d7e7f810189171724a550	2.11024	61.96	MAT	0.224218	pH_High	NA	NA	NA	Bacteria	Proteobacteria	Alphaproteobacteria	Rhodobacterales	Rhodobacteraceae	Paracoccus	Paracoccus sp. BM15
4d557461b21075df34cedf947d0f8627b36c4698	5.44882	29.95	AI	NA	NA	NA	NA	NA	unclassified	Unclassified	Unclassified	Unclassified	Unclassified	Unclassified	Unclassified
4bd1b660807e00ef248c2efc986a3024d4263e67	3.71654	16.11	AI	NA	NA	NA	NA	NA	Bacteria	Actinobacteria	Actinobacteria	Micrococcales	Dermacoccaceae	Luteipulveratus	Luteipulveratus halotolerans
4b1b2e081364b764a73a37d1bfcfa1ef43439e8a	4.53543	4.47	MAT	NA	NA	NA	NA	NA	Bacteria	Cyanobacteria		Nostocales			Nostocales cyanobacterium HT-58-2
4ad234306422f489a499b37527df489ee3e67e11	2.48819	12.99	MAT	NA	NA	NA	NA	NA	Bacteria	Proteobacteria	Alphaproteobacteria	Rhizobiales	Methylobacteriaceae	Methylobacterium	Methylobacterium mesophilicum
49f182c0bd595a22e46d26f54b46fffd02f1d914	2.14173	-3.47	MAT	NA	NA	NA	NA	NA	Bacteria	Proteobacteria	Alphaproteobacteria	Rhizobiales	Methylobacteriaceae	Methylobacterium	Methylobacterium mesophilicum
4940deaa1807d2fb22ce298abd115c7ab28b42bf	3.37008	22.27	MAT	NA	NA	NA	NA	NA	unclassified	Unclassified	Unclassified	Unclassified	Unclassified	Unclassified	Unclassified
48d8aa6c5193a81610c56de9629266965741e95d	2.70866	8.16	AP	NA	NA	NA	NA	NA	Bacteria	Actinobacteria	Actinobacteria	Streptosporangiales	Nocardiopsaceae	Streptomonospora	Streptomonospora alba
441733bf423a3f24d559f633c7e03977eb96ba7e	2.61417	15.11	TN	NA	NA	NA	NA	NA	Bacteria	Proteobacteria	Alphaproteobacteria	Rhizobiales	Bradyrhizobiaceae	Bradyrhizobium	Bradyrhizobium valentinum
418a6eef6b23ed3f5bc84930b055cba0f5236b0c	2.26772	15.92	MAT	NA	NA	NA	NA	NA	Bacteria	Cyanobacteria		Nostocales	Nostocaceae	Nostoc	Nostoc sp. PCC 7524
412261e690638f17975fdaf1fcbf65a47ea9f077	2.20472	35.55	AI	-0.175347	AI_Low	NA	NA	NA	Bacteria	Cyanobacteria		Nostocales			Nostocales cyanobacterium HT-58-2
3fd953b207acee0c3b28382c3d493d0cb8b5e77f	3.46457	33.85	MAT	-0.104683	AI_Low	NA	NA	NA	Bacteria	Cyanobacteria		Nostocales	Nostocaceae	Trichormus	Trichormus variabilis
3da2092246c661584af0920cfb62704b6e943645	2.89764	24.99	MAT	NA	NA	NA	NA	NA	unclassified	Unclassified	Unclassified	Unclassified	Unclassified	Unclassified	Unclassified
3d6151a960b75af26800c4a13f662fec301e184a	6.67717	17.67	MAT	NA	NA	NA	NA	NA	unclassified	Unclassified	Unclassified	Unclassified	Unclassified	Unclassified	Unclassified
3c6a3f459c69c57cc7778fd94055cc3047fa0722	2.70866	14.99	TOC	NA	NA	NA	NA	NA	Bacteria	Cyanobacteria		Nostocales			Nostocales cyanobacterium HT-58-2
395e819df8464e745bc5f268781272fb66aac0c1	5.79528	29.29	AP	NA	NA	NA	NA	NA	unclassified	Unclassified	Unclassified	Unclassified	Unclassified	Unclassified	Unclassified
39055a0e4c8a7021428dba03cca6343056197614	2.26772	21.1	MAT	NA	NA	NA	NA	NA	unclassified	Unclassified	Unclassified	Unclassified	Unclassified	Unclassified	Unclassified
34ce8f75fad517d2b2291a62876b35c46c8fa2e7	6.80315	-14.14	MAT	NA	NA	NA	NA	NA	unclassified	Unclassified	Unclassified	Unclassified	Unclassified	Unclassified	Unclassified
3469412fc541851cf89cc285bf5f0ca75d90e917	2.74016	33.62	AI	-0.2169	AI_Low	NA	NA	NA	unclassified	Unclassified	Unclassified	Unclassified	Unclassified	Unclassified	Unclassified
3210723ef85f2727b4d1c82ad3fdfdd328594dc5	4.97638	37.42	AP	-0.255524	AI_Low	NA	NA	NA	Bacteria	Cyanobacteria		Nostocales			Nostocales cyanobacterium HT-58-2
2dca68e538ca8590af36ff4c814c8fa858c02852	2.26772	24.55	MAT	NA	NA	NA	NA	NA	Bacteria	Cyanobacteria		Nostocales	Nostocaceae	Nostoc	Nostoc sp. PCC 7524
2bf2e233cf5e42362255b7a90ffa3e1feb57b7e7	3.90551	28.4	AI	NA	NA	NA	NA	NA	Bacteria	Cyanobacteria		Nostocales			Nostocales cyanobacterium HT-58-2
2adb1f10a26bea0ffc9fea9c837f2f35de5830e1	2.83465	-21	AI	NA	NA	NA	NA	NA	Bacteria	Cyanobacteria		Nostocales			Nostocales cyanobacterium HT-58-2
27fd2a68fe4e950b62706d0bfb97792be7d4b2c3	2.04724	24.12	Ecosystem_types_group_order	NA	NA	NA	NA	NA	Bacteria	Cyanobacteria		Nostocales	Nostocaceae	Nostoc	Nostoc sp. 'Peltigera membranacea cyanobiont' N6
2556f28f8683f900ec34fad0832eda38d1f3fca4	17.8268	23.13	AP	NA	NA	NA	NA	NA	Bacteria	Cyanobacteria		Nostocales			Nostocales cyanobacterium HT-58-2
245e022fa58a7a1a696d778f1aee8a454eb44204	2.77165	11.7	MAT	NA	NA	NA	NA	NA	Bacteria	Cyanobacteria		Nostocales			Nostocales cyanobacterium HT-58-2
22d39f252c04f61dafae23f5bea363894d287d9d	2.61417	5.55	Ecosystem_types_group_order	NA	NA	NA	NA	NA	Bacteria	Actinobacteria	Actinobacteria	Micrococcales	Dermacoccaceae	Luteipulveratus	Luteipulveratus mongoliensis
222577594507d04c25566c9a6a4d0dfc7244a460	7.27559	31.58	Ecosystem_types_group_order	-0.224297	AI_Low	NA	NA	NA	Bacteria	Cyanobacteria		Nostocales	Nostocaceae	Trichormus	Trichormus variabilis
1f0f68863c3de89903c61ce739cd54f8cc464267	2.23622	21.13	AI	NA	NA	NA	NA	NA	Bacteria	Cyanobacteria		Nostocales	Scytonemataceae	Scytonema	Scytonema sp. HK-05
1ea86c26b161ab0773734508835f016dcf06c954	2.51969	11.26	TN	NA	NA	NA	NA	NA	unclassified	Unclassified	Unclassified	Unclassified	Unclassified	Unclassified	Unclassified
1e4a0105a216c045935139b0c70ce02c7b8f1a06	3.84252	23.72	Ecosystem_types_group_order	NA	NA	NA	NA	NA	unclassified	Unclassified	Unclassified	Unclassified	Unclassified	Unclassified	Unclassified
1d4ea1563736893c48a23be479da79eb71f5dbf2	3.68504	-18.26	Ecosystem_types_group_order	NA	NA	NA	NA	NA	unclassified	Unclassified	Unclassified	Unclassified	Unclassified	Unclassified	Unclassified
1c0de11888f9cc33ebca7e4937b8b2803f4dbfae	2.83465	-1.51	TP	NA	NA	NA	NA	NA	Bacteria	Cyanobacteria		Nostocales	Scytonemataceae	Scytonema	Scytonema sp. HK-05
1a6219ca7619d44821cda365265dddf172496606	2.14173	-8.22	AI	NA	NA	NA	NA	NA	unclassified	Unclassified	Unclassified	Unclassified	Unclassified	Unclassified	Unclassified
18a617a35bfac7fe4b8732a5db4c75c37f1200e9	3.02362	13.34	TN	NA	NA	NA	NA	NA	Bacteria	Cyanobacteria		Nostocales			Nostocales cyanobacterium HT-58-2
18356edb00ab94b7e9330ed144da0fb8f9e40958	2.80315	11.79	TP	NA	NA	NA	NA	NA	Bacteria	Cyanobacteria		Nostocales			Nostocales cyanobacterium HT-58-2
17fc388b74ad325bcce36516cfd61a70e5ee5362	2.23622	6.78	AI	NA	NA	NA	NA	NA	unclassified	Unclassified	Unclassified	Unclassified	Unclassified	Unclassified	Unclassified
17c5d77dd6906a7a2fb2b47cc782d176db237fc5	2.58268	9.55	MAT	NA	NA	NA	NA	NA	Bacteria	Proteobacteria	Alphaproteobacteria	Rhizobiales	Methylobacteriaceae	Methylobacterium	Methylobacterium sp. 17Sr1-43
1637fd7fe481d1d3e063b19b17877085dad49892	4.12598	1.39	C:P	NA	NA	NA	NA	NA	unclassified	Unclassified	Unclassified	Unclassified	Unclassified	Unclassified	Unclassified
163363efef62133526afa2176b04cfe7174d9914	2.3622	13.39	MAT	NA	NA	NA	NA	NA	unclassified	Unclassified	Unclassified	Unclassified	Unclassified	Unclassified	Unclassified
15aeb7a3d75ef4d7d8893ccc21d3813bb7a8e808	7.74803	21.18	AI	NA	NA	NA	NA	NA	Bacteria	Cyanobacteria		Nostocales			Nostocales cyanobacterium HT-58-2
15885fb0bfb974ae109e4f69e85294afeaabd9e9	2.70866	14.29	pH	NA	NA	NA	NA	NA	Bacteria	Cyanobacteria		Nostocales			Nostocales cyanobacterium HT-58-2
1572233217b9ee9722aa7084c1d1b4e23d1a0e65	3.24409	25.87	MAT	NA	NA	NA	NA	NA	Bacteria	Cyanobacteria		Nostocales	Nostocaceae	Nostoc	Nostoc punctiforme
1478bf73ba9deca961609401408cc92edbc0c58e	2.23622	38.08	Ecosystem_types_group_order	-0.107193	pH_Low	NA	NA	NA	unclassified	Unclassified	Unclassified	Unclassified	Unclassified	Unclassified	Unclassified
14352d93c9bf7b8b3c3ac1dd4e531329fd4f66ed	3.24409	15.95	TN	NA	NA	NA	NA	NA	Bacteria	Cyanobacteria		Nostocales	Nostocaceae	Nostoc	Nostoc sp. 'Peltigera membranacea cyanobiont' N6
132df21bf758426e9cbf9889c0a6dd06b6e394f6	2.20472	6.5	MAT	NA	NA	NA	NA	NA	Bacteria	Actinobacteria	Actinobacteria	Micrococcales	Dermacoccaceae	Luteipulveratus	Luteipulveratus halotolerans
1023cc7ad98430dd531f3edf485ccca677c996c3	2.58268	9.8	TP	NA	NA	JAHHID010000040	97.931	99	Bacteria	Cyanobacteria		Nostocales	Rivulariaceae	Calothrix	Calothrix sp. NIES-2100
0fe5d7dc89f5eeb9c9a9e13461e2d0ef4b90201a	4.66142	12.76	AP	NA	NA	NA	NA	NA	unclassified	Unclassified	Unclassified	Unclassified	Unclassified	Unclassified	Unclassified
0fcefd47433060cdea06ea199781a9636e50a7f3	3.27559	2.31	AI	NA	NA	NA	NA	NA	Bacteria	Proteobacteria	Alphaproteobacteria	Rhizobiales	Bradyrhizobiaceae	Variibacter	Variibacter gotjawalensis
0f5f745ce8abd9ce1024a61546ec22b3c8dcd1af	2.58268	59.49	MAT	0.146754	MAT_High	NA	NA	NA	Bacteria	Proteobacteria	Alphaproteobacteria	Rhizobiales	Hyphomicrobiaceae	Rhodoplanes	Rhodoplanes sp. Z2-YC6860
0f260f7cd9a356f21c4ca69e67a84eaf0a08a270	6.29921	16.66	TN	NA	NA	NA	NA	NA	Bacteria	Cyanobacteria		Nostocales			Nostocales cyanobacterium HT-58-2
0eb04f1664f63959defabe7c55457961657abf4e	4.50394	19.7	TP	NA	NA	NA	NA	NA	Bacteria	Firmicutes	Bacilli	Bacillales	Paenibacillaceae	Aneurinibacillus	Aneurinibacillus migulanus
0e9dfeff5ce334d57f864e5d0e3c4c7a30fd5b45	4.09449	17.49	Ecosystem_types_group_order	NA	NA	NA	NA	NA	Bacteria	Cyanobacteria		Nostocales			Nostocales cyanobacterium HT-58-2
0dea07007fd942d71730c40965cef9c4b8ccbfcb	2.45669	4.04	MAT	NA	NA	NA	NA	NA	Bacteria	Actinobacteria	Actinobacteria	Pseudonocardiales	Pseudonocardiaceae	Actinokineospora	Actinokineospora spheciospongiae
0d537c8577fbc1866b854bfe372768030a61e122	3.1811	14.16	AI	NA	NA	NA	NA	NA	Bacteria	Firmicutes	Bacilli	Bacillales	Bacillaceae	Bacillus	Bacillus sonorensis
0cec8bdd9ba3f5f9216176169109dab4cd81cf71	3.02362	-11.12	MAT	NA	NA	NA	NA	NA	Bacteria	Cyanobacteria		Nostocales	Scytonemataceae	Scytonema	Scytonema sp. NIES-4073
0b85a941acf8d6a9cf0eab98fef265a0d1a835f6	6.74016	40.72	Ecosystem_types_group_order	-0.234513	AI_Low	NA	NA	NA	Bacteria	Cyanobacteria		Nostocales			Nostocales cyanobacterium HT-58-2
0b1d661a84424aa36a78ade2a5baadfe8f74b415	2.55118	4.5	pH	NA	NA	NA	NA	NA	Bacteria	Proteobacteria	Alphaproteobacteria	Rhizobiales	Bradyrhizobiaceae	Bradyrhizobium	Bradyrhizobium icense
0ad98de2fc61f98fec1a4350437465a8028783ef	8.59843	45.25	MAT	-0.203347	AI_Low	NA	NA	NA	Bacteria	Cyanobacteria		Nostocales	Scytonemataceae	Scytonema	Scytonema sp. HK-05
0a3421e95cd06fcd96b85ff8b6e09bbcef8ee238	2.07874	15.06	MAT	NA	NA	NA	NA	NA	Bacteria	Cyanobacteria		Nostocales	Nostocaceae	Trichormus	Trichormus variabilis
08cb5da5397cb232c7aca5cfc5089290b405254d	2.33071	9.43	TN	NA	NA	NA	NA	NA	unclassified	Unclassified	Unclassified	Unclassified	Unclassified	Unclassified	Unclassified
079fa91d92a70bef790058309811d22d3279b9f2	2.14173	2.94	pH	NA	NA	NA	NA	NA	Bacteria	Proteobacteria	Alphaproteobacteria	Rhizobiales	Methylobacteriaceae	Methylobacterium	Methylobacterium mesophilicum
05ce7d1c31ab702730b8fd7ac94ef79ccfbebf6d	7.1811	30.85	AI	-0.187479	AI_Low	NA	NA	NA	unclassified	Unclassified	Unclassified	Unclassified	Unclassified	Unclassified	Unclassified
0583a6e7f492d19982e449def84aca46b72c2ae0	2.01575	15.47	TP	NA	NA	NA	NA	NA	Bacteria	Proteobacteria	Alphaproteobacteria	Rhizobiales	Phyllobacteriaceae	Nitratireductor	Nitratireductor pacificus
047ee50ee7a27b1964e7f25a67f12ba5d0e85ff3	3.87402	13.3	AI	NA	NA	NA	NA	NA	unclassified	Unclassified	Unclassified	Unclassified	Unclassified	Unclassified	Unclassified
043568bcf1689968d43de4103d0f067dad3408bb	3.52756	11.65	TP	NA	NA	NA	NA	NA	unclassified	Unclassified	Unclassified	Unclassified	Unclassified	Unclassified	Unclassified
040a367a7347a93b3e223ae3769e19c68fb2733a	2.89764	3.23	pH	NA	NA	NA	NA	NA	Bacteria	Proteobacteria	Alphaproteobacteria	Rhizobiales	Methylobacteriaceae	Methylobacterium	Methylobacterium mesophilicum
031962548f0bbb954d71978e140fc00c7b983fae	3.14961	34.22	AI	-0.208937	AI_Low	NA	NA	NA	Bacteria	Cyanobacteria		Nostocales			Nostocales cyanobacterium HT-58-2
0258fa273a8a0ec04bd2057d0484541b5b0a71a3	2.11024	6.92	MAT	NA	NA	NA	NA	NA	unclassified	Unclassified	Unclassified	Unclassified	Unclassified	Unclassified	Unclassified
02012686598098f3ef328a91a3802025c9e97717	2.80315	77.2	AI	0.117405	MAT_High	NA	NA	NA	Bacteria	Proteobacteria	Alphaproteobacteria	Rhizobiales	Methylobacteriaceae	Methylobacterium	Methylobacterium mesophilicum
016334f86a6c0330cf7ae4483581d603e000a70d	3.77953	13.54	AI	NA	NA	NA	NA	NA	Bacteria	Firmicutes	Bacilli	Bacillales	Paenibacillaceae	Aneurinibacillus	Aneurinibacillus migulanus
00538468a0659ca4c58cdd81ed01bb587f86bcec	2.07874	25.31	pH	NA	NA	NA	NA	NA	Bacteria	Proteobacteria	Alphaproteobacteria	Rhodospirillales	Rhodospirillaceae	Oceanibaculum	Oceanibaculum indicum
f6f2ea1f866f3ccb048afd6697b567ff3ebe9ffe	2.26772	19.13	AI	NA	NA	NA	NA	NA	unclassified	Unclassified	Unclassified	Unclassified	Unclassified	Unclassified	Unclassified
e21a2969050867cd924d85b3e38e3722b1c6a3d9	3.1811	25.34	MAT	NA	NA	NA	NA	NA	Bacteria	Firmicutes	Bacilli	Bacillales	Bacillaceae	Bacillus	Bacillus sonorensis
d8cb84c88a267102fc1ccf7d337796e875bf83c2	3.33858	35.35	MAT	0.162066	MAT_High	NA	NA	NA	Bacteria	Proteobacteria	Alphaproteobacteria	Rhizobiales	Hyphomicrobiaceae	Rhodoplanes	Rhodoplanes sp. Z2-YC6860
d5d0f7de0bc3da951d4dcfd2a82884414f1d1967	2.23622	19.71	MAT	NA	NA	NA	NA	NA	Bacteria	Cyanobacteria		Nostocales	Nostocaceae	Nostoc	Nostoc commune
cf60564c8b80a085d14795a440b847d4c38967d2	2.23622	15.33	MAT	NA	NA	NA	NA	NA	Bacteria	Cyanobacteria		Nostocales	Nostocaceae	Trichormus	Trichormus variabilis
cc793d187606282a2eaea8af6cd716796b287332	4.31496	31.05	MAT	-0.12437	MAT_Low	NA	NA	NA	Bacteria	Cyanobacteria		Nostocales	Nostocaceae	Trichormus	Trichormus variabilis
ca36d45765349764b1b02e20b7fc97f4e6ccca1d	2.11024	4.8	AI	NA	NA	NA	NA	NA	Bacteria	Proteobacteria	Gammaproteobacteria	Pseudomonadales	Pseudomonadaceae	Pseudomonas	Pseudomonas fuscovaginae
c9c687b29b0e2b08bfe2cbacd6e19f1902e3bf2d	5.6063	39.63	MAT	-0.183092	MAT_Low	NA	NA	NA	unclassified	Unclassified	Unclassified	Unclassified	Unclassified	Unclassified	Unclassified
c78e180c6fe0260c8669436a8abe87cd50256421	3.59055	31.36	MAT	-0.243764	AI_Low	NA	NA	NA	unclassified	Unclassified	Unclassified	Unclassified	Unclassified	Unclassified	Unclassified
c534dd597e852509859d07742e5f1c8c4be2f968	3.14961	6	MAT	NA	NA	NA	NA	NA	Bacteria	Proteobacteria	Alphaproteobacteria	Rhizobiales	Bradyrhizobiaceae	Bradyrhizobium	Bradyrhizobium jicamae
c2fc2d11bd2c8209466d32ec9fcfe8daa3e47389	2.33071	19.62	C:P	NA	NA	NA	NA	NA	Bacteria	Cyanobacteria		Nostocales	Scytonemataceae	Scytonema	Scytonema sp. HK-05
af272f1758ef4ee967c0d76bc6125eead0ffe6bf	2.01575	17.27	AI	NA	NA	NA	NA	NA	Bacteria	Proteobacteria	Gammaproteobacteria	Pseudomonadales	Pseudomonadaceae	Pseudomonas	Pseudomonas syringae group genomosp. 3
aef8c65ada88160df072f703d1dba95c44dbbce4	2.17323	12.27	TP	NA	NA	NA	NA	NA	Bacteria	Firmicutes	Bacilli	Bacillales	Bacillaceae	Bacillus	Bacillus amyloliquefaciens
aa9d3c82bcdbb6d6d04965eeaefd5c510a2a65ce	2.70866	5.38	MAT	NA	NA	NA	NA	NA	Bacteria	Planctomycetes	Planctomycetia	Planctomycetales	Planctomycetaceae	Rhodopirellula	Rhodopirellula maiorica
a7b90d8e919b10101ffd0a9a2dc0e0d1e77bfe97	2.67717	23.06	TN	NA	NA	NA	NA	NA	Bacteria	Proteobacteria	Alphaproteobacteria	Rhizobiales	Bradyrhizobiaceae	Bradyrhizobium	Bradyrhizobium icense
a345d32779d954625b6d9f2f51dc22ac9902f9d1	4.50394	5.22	pH	NA	NA	NA	NA	NA	Bacteria	Proteobacteria	Alphaproteobacteria	Rhizobiales	Bradyrhizobiaceae	Bradyrhizobium	Bradyrhizobium valentinum
9ad5ad8a6ae247b0ec4f11a7a450b8f1cb333f81	2.45669	13.77	AI	NA	NA	NA	NA	NA	Bacteria	Cyanobacteria		Nostocales			Nostocales cyanobacterium HT-58-2
97726044167c2fc879282d658d3c9862552cc8ee	6.70866	25.24	AP	NA	NA	NA	NA	NA	unclassified	Unclassified	Unclassified	Unclassified	Unclassified	Unclassified	Unclassified
96eca5f9f4c1368b91f7ec282deaf3a77a6c1b01	2.77165	34.77	Ecosystem_types_group_order	-0.132314	MAT_Low	NA	NA	NA	unclassified	Unclassified	Unclassified	Unclassified	Unclassified	Unclassified	Unclassified
960f61c9f7a0a17abe19f3ce306be2a1fcba9a50	2.70866	12.58	AP	NA	NA	NA	NA	NA	unclassified	Unclassified	Unclassified	Unclassified	Unclassified	Unclassified	Unclassified
94701ebcdfd95367abae7c4d72bb0357ab5efb54	3.93701	16.49	TP	NA	NA	NA	NA	NA	Bacteria	Cyanobacteria		Nostocales			Nostocales cyanobacterium HT-58-2
91256f167819eb2c0f2fc6ad7dcf486f0f55df8f	2.07874	9.2	MAT	NA	NA	NA	NA	NA	Bacteria	Proteobacteria	Alphaproteobacteria	Rhizobiales	Bradyrhizobiaceae	Bradyrhizobium	Bradyrhizobium erythrophlei
90f15e895eeb1273bcc842fe78b5745476750599	3.68504	8.76	TP	NA	NA	NA	NA	NA	Bacteria	Cyanobacteria		Nostocales			Nostocales cyanobacterium HT-58-2
90a16e77da9e0785c3e24fdddf6cc50bd98d79e8	2.07874	36.25	AI	-0.105087	MAT_Low	NA	NA	NA	Bacteria	Deinococcus-Thermus	Deinococci	Deinococcales	Deinococcaceae	Deinococcus	Deinococcus proteolyticus
8e3c8a2fa6d8625394bd77cbaa2bc5390e6cb5bd	3.59055	10.49	Ecosystem_types_group_order	NA	NA	NA	NA	NA	Bacteria	Proteobacteria	Alphaproteobacteria	Rhizobiales	Bradyrhizobiaceae	Bradyrhizobium	Bradyrhizobium icense
878a775e7bce9cd1bfa2002714feb45a9b8712e6	2.3937	35.33	MAT	-0.160815	MAT_Low	NA	NA	NA	Bacteria	Proteobacteria	Alphaproteobacteria	Rhizobiales	Bradyrhizobiaceae	Bradyrhizobium	Bradyrhizobium lablabi
8559c8f45746406ce654246efb17a1b2b65a4a5f	2.20472	6.75	TN	NA	NA	NA	NA	NA	unclassified	Unclassified	Unclassified	Unclassified	Unclassified	Unclassified	Unclassified
7e5a26a481159be40f6e81bdcace8275764121d9	2.80315	11.16	pH	NA	NA	NA	NA	NA	Bacteria	Proteobacteria	Gammaproteobacteria	Pseudomonadales	Pseudomonadaceae	Pseudomonas	Pseudomonas orientalis
7c915e21a8cc6de9506618e9b92bf80a73ef1eb8	2.29921	12.95	AI	NA	NA	NA	NA	NA	unclassified	Unclassified	Unclassified	Unclassified	Unclassified	Unclassified	Unclassified
77ec77fcdcb0cced4f15f9da7758694b7de0442d	2.45669	45.03	MAT	NA	NA	NA	NA	NA	unclassified	Unclassified	Unclassified	Unclassified	Unclassified	Unclassified	Unclassified
77b22b77ced1f0bd659e674a8aa62008955b5bae	3.30709	5.56	MAT	NA	NA	NA	NA	NA	Bacteria	Proteobacteria	Alphaproteobacteria	Rhizobiales	Bradyrhizobiaceae	Bradyrhizobium	Bradyrhizobium icense
73b86cae9b7b7b8d5340c3470669349fcfd3f767	2.33071	15.44	MAT	NA	NA	NA	NA	NA	unclassified	Unclassified	Unclassified	Unclassified	Unclassified	Unclassified	Unclassified
7089a32c61aca68695a176b82f636bc74dce4fa7	2.04724	0.15	TP	NA	NA	NA	NA	NA	Bacteria	Cyanobacteria		Nostocales	Nostocaceae	Nostoc	Nostoc sp. 'Peltigera membranacea cyanobiont' N6
6f0519d086aafb11be80b3e6b6fb3c775ca3416f	2.61417	22.15	MAT	NA	NA	NA	NA	NA	unclassified	Unclassified	Unclassified	Unclassified	Unclassified	Unclassified	Unclassified
6a7e6bd8fc8715f5e20be1a6c609aa4c67640aa8	2.58268	19.22	MAT	NA	NA	NA	NA	NA	unclassified	Unclassified	Unclassified	Unclassified	Unclassified	Unclassified	Unclassified
64015d1a9590a4f208a6e995ea57b5a7370cfef1	2.92913	5.54	TN	NA	NA	NA	NA	NA	Bacteria	Proteobacteria	Alphaproteobacteria	Rhizobiales	Methylobacteriaceae	Methylobacterium	Methylobacterium mesophilicum
566c779ad78db5d8843ccfb48407b15526d066a5	3.2126	1.49	C:P	NA	NA	NA	NA	NA	unclassified	Unclassified	Unclassified	Unclassified	Unclassified	Unclassified	Unclassified
5509c1c270ef67839ebd35c02d90ba2bb1b7e309	2.61417	16.1	TN	NA	NA	NA	NA	NA	unclassified	Unclassified	Unclassified	Unclassified	Unclassified	Unclassified	Unclassified
549d7f7ef9228e90ae12af6619e4bbfcbb6120ec	2.29921	12.87	AI	NA	NA	NA	NA	NA	Bacteria	Proteobacteria	Alphaproteobacteria	Rhizobiales	Bradyrhizobiaceae	Bradyrhizobium	Bradyrhizobium sp. BTAi1
5128ff29294425e44e9f2b3ebdf7f8553567b76a	2.61417	0.33	MAT	NA	NA	NA	NA	NA	Bacteria	Cyanobacteria		Nostocales	Nostocaceae	Nostoc	Nostoc sp. PCC 7524
4cc44b8927c09c5a5699f04ca4ae9127083f94fb	2.04724	17.74	pH	NA	NA	NA	NA	NA	unclassified	Unclassified	Unclassified	Unclassified	Unclassified	Unclassified	Unclassified
49394a04acb21d94cb7bd4c5f9bbf5211298c4c1	2.29921	24.47	MAT	NA	NA	NA	NA	NA	Bacteria	Firmicutes	Bacilli	Bacillales	Bacillaceae	Bacillus	Bacillus sonorensis
49000d22ba5b7cd0ca7dcbde6de08e7d0ea11c2f	2.20472	28.38	AI	NA	NA	NA	NA	NA	Bacteria	Firmicutes	Bacilli	Bacillales	Bacillaceae	Bacillus	Bacillus glycinifermentans
484806798a246bb7b4a31e61ee0dd676ce0cb8cf	4.72441	36.54	Ecosystem_types_group_order	-0.121641	AI_Low	NA	NA	NA	Bacteria	Cyanobacteria		Nostocales			Nostocales cyanobacterium HT-58-2
4813c5e4e89bdd19beea7e4d9c827bf1153800f3	2.07874	14.94	TN	NA	NA	NA	NA	NA	Bacteria	Firmicutes	Bacilli	Bacillales	Bacillaceae	Bacillus	Bacillus glycinifermentans
46ce7470ca5b15917d0a8fe56afd2fdcba402a5f	2.48819	-1.08	pH	NA	NA	NA	NA	NA	unclassified	Unclassified	Unclassified	Unclassified	Unclassified	Unclassified	Unclassified
46a130151453a24a213cc0b220da6773ac76de8f	2.3622	12.15	MAT	NA	NA	NA	NA	NA	Bacteria	Cyanobacteria		Chroococcales	Chroococcaceae	Gloeocapsa	Gloeocapsa sp. PCC 7428
464705b5f57527bfc58c9749cd2cf554be3cdc9e	2.64567	12.24	pH	NA	NA	NA	NA	NA	Bacteria	Cyanobacteria		Nostocales	Nostocaceae	Nostoc	Nostoc sp. NIES-3756
45220566def467923416a1c45f1ce667261b97a8	5.98425	32.42	TP	-0.150702	AI_Low	NA	NA	NA	Bacteria	Cyanobacteria		Chroococcales	Chroococcaceae	Gloeocapsa	Gloeocapsa sp. PCC 7428
44a7e5e7b2f2c6fb108928a285317d5e3ff0fb00	2.51969	29.3	TP	NA	NA	NA	NA	NA	Bacteria	Proteobacteria	Alphaproteobacteria	Rhizobiales	Bradyrhizobiaceae	Bradyrhizobium	Bradyrhizobium lablabi
3eabad34f5be3a4e70dd879a4528741657c3a8fa	4.18898	34.52	TP	NA	NA	NA	NA	NA	unclassified	Unclassified	Unclassified	Unclassified	Unclassified	Unclassified	Unclassified
3c0ed8ceacf28a6328b905ef316c7837d38b59ec	4.12598	33.06	MAT	-0.207221	MAT_Low	NA	NA	NA	Bacteria	Firmicutes	Bacilli	Bacillales	Planococcaceae	Sporosarcina	Sporosarcina globispora
3bc47c0d0e56538645c8ddff7f06499461dcd1b6	2.58268	21.42	TN	NA	NA	NA	NA	NA	Bacteria	Proteobacteria	Gammaproteobacteria	Pseudomonadales	Pseudomonadaceae	Pseudomonas	Pseudomonas syringae group genomosp. 3
3a98fecd87636dcb76ef5de1a90adb24d5c62fa1	2.64567	-1.76	MAT	NA	NA	NA	NA	NA	Bacteria	Firmicutes	Bacilli	Bacillales	Bacillaceae	Bacillus	Bacillus glycinifermentans
3a0903c884ba0a9007a7dfba297b6501964f33c9	2.29921	50.73	Ecosystem_types_group_order	0.176433	AI_High	NA	NA	NA	Bacteria	Proteobacteria	Betaproteobacteria	Burkholderiales	Burkholderiaceae	Ralstonia	Ralstonia insidiosa
384ba019c958d23d4597cc3c92e7ebca8f6e1bbe	2.01575	26.87	MAT	NA	NA	NA	NA	NA	Bacteria	Proteobacteria	Gammaproteobacteria	Pseudomonadales	Pseudomonadaceae	Pseudomonas	Pseudomonas fluorescens
375f3a818de2d1d5f6cdeecabd08d2ebf66381b5	2.89764	24.76	TN	NA	NA	NA	NA	NA	Bacteria	Proteobacteria	Gammaproteobacteria	Pseudomonadales	Pseudomonadaceae	Pseudomonas	Pseudomonas orientalis
375aa2a82f2db45c042fbea8110dcca57ec5f9bc	2.20472	11.69	MAT	NA	NA	NA	NA	NA	Bacteria	Firmicutes	Bacilli	Bacillales	Bacillaceae	Bacillus	Bacillus methanolicus
352558f2b4657170717ecab0651657825f74413f	2.48819	13.04	MAT	NA	NA	NA	NA	NA	Bacteria	Proteobacteria	Gammaproteobacteria	Pseudomonadales	Pseudomonadaceae	Pseudomonas	Pseudomonas orientalis
33c373c58d4425dc988cf8f2f7d6acd6e8ef91a9	4.15748	21.37	MAT	NA	NA	NA	NA	NA	unclassified	Unclassified	Unclassified	Unclassified	Unclassified	Unclassified	Unclassified
33b7bb30d5b25656f2546ef987e4cad3b26dd753	5.35433	24.05	MAT	NA	NA	NA	NA	NA	unclassified	Unclassified	Unclassified	Unclassified	Unclassified	Unclassified	Unclassified
33219ad3849656d028e9acc48722d0e1a9b04a0c	2.20472	20.87	MAT	NA	NA	NA	NA	NA	Bacteria	Proteobacteria	Gammaproteobacteria	Pseudomonadales	Pseudomonadaceae	Pseudomonas	Pseudomonas orientalis
301125371472f8f93bceacdd166fbffc9abbb9cb	4.28346	13.27	TN	NA	NA	NA	NA	NA	Bacteria	Actinobacteria	Actinobacteria	Pseudonocardiales	Pseudonocardiaceae	Saccharothrix	Saccharothrix espanaensis
2f839848bc03effeb477876d836756557bf3cd8e	3.59055	37.64	AI	NA	NA	NA	NA	NA	Bacteria	Cyanobacteria		Nostocales	Scytonemataceae	Scytonema	Scytonema sp. HK-05
2ebe2f2b552682fb1089870c7a967f3f2a9bf3e2	2.01575	35.34	C:P	NA	NA	NA	NA	NA	Bacteria	Proteobacteria	Alphaproteobacteria	Rhodospirillales	Rhodospirillaceae	Nitrospirillum	Nitrospirillum amazonense
2bc24e69ace81b339e0d3445dbc421cd469f7e41	3.43307	22.3	TN	NA	NA	NA	NA	NA	unclassified	Unclassified	Unclassified	Unclassified	Unclassified	Unclassified	Unclassified
2740f5621b846d102a021a8a2395738a164cf979	2.58268	14.84	C:P	NA	NA	NA	NA	NA	Bacteria	Cyanobacteria		Nostocales	Nostocaceae	Nostoc	Nostoc sp. PCC 7524
26933f414ae09d30699c103848909be3dd2e7e2c	2.29921	22.51	AI	NA	NA	NA	NA	NA	Bacteria	Cyanobacteria		Nostocales	Nostocaceae	Nostoc	Nostoc sp. PCC 7524
2602c2635be43667e356b53be64ac7f99339157f	2.26772	22.98	AI	NA	NA	NA	NA	NA	unclassified	Unclassified	Unclassified	Unclassified	Unclassified	Unclassified	Unclassified
259451624f11ddd3b31dc03e62435e5d0eeb85c5	2.51969	-13.74	MAT	NA	NA	NA	NA	NA	Bacteria	Actinobacteria	Actinobacteria	Micrococcales	Dermacoccaceae	Luteipulveratus	Luteipulveratus halotolerans
23147d07eef44b394dbffad8d922a82626c5c4ec	3.2126	56.63	AP	0.145059	MAT_High	NA	NA	NA	Bacteria	Proteobacteria	Alphaproteobacteria	Rhizobiales	Methylobacteriaceae	Methylobacterium	Methylobacterium mesophilicum
22aee3eda5db5213b22a0d336b58eb756451708a	2.92913	13.66	MAT	NA	NA	NA	NA	NA	Bacteria	Actinobacteria	Actinobacteria	Micromonosporales	Micromonosporaceae	Actinoplanes	Actinoplanes derwentensis
22a4c046c4756734002a12950198173fe7c1a383	2.07874	14.67	MAT	NA	NA	NA	NA	NA	Bacteria	Proteobacteria	Alphaproteobacteria	Rhizobiales	Bradyrhizobiaceae	Bradyrhizobium	Bradyrhizobium icense
206fd4153b03d0addf3a10b055ed9d54904ae20f	2.11024	34.17	MAT	-0.190735	MAT_Low	NA	NA	NA	Bacteria	Cyanobacteria		Nostocales	Nostocaceae	Trichormus	Trichormus variabilis
1e2e4a2d8bcc236a1af1be5b9cf2fcc8b289fd48	2.01575	23.36	AP	NA	NA	NA	NA	NA	unclassified	Unclassified	Unclassified	Unclassified	Unclassified	Unclassified	Unclassified
1d0da40730a24b289dfdd96e0b376a90cd35ab1f	2.58268	22.8	AP	NA	NA	NA	NA	NA	Bacteria	Actinobacteria	Rubrobacteria	Rubrobacterales	Rubrobacteraceae	Rubrobacter	Rubrobacter xylanophilus
1bec98aa61e031f3c322e3f12414c456f538310d	3.24409	38.95	MAT	-0.216664	AI_Low	NA	NA	NA	unclassified	Unclassified	Unclassified	Unclassified	Unclassified	Unclassified	Unclassified
1b3c0a08e3345ab0cc65cb746054d1f433cc8684	3.46457	11.8	TN	NA	NA	NA	NA	NA	Bacteria	Cyanobacteria		Nostocales	Nostocaceae	Nostoc	Nostoc sp. PCC 7524
1814dfdccdb016e927c9eccc5e2b539829ff0715	2.89764	27.36	MAT	NA	NA	NA	NA	NA	Bacteria	Proteobacteria	Alphaproteobacteria	Rhizobiales	Bradyrhizobiaceae	Bradyrhizobium	Bradyrhizobium icense
1681e6e51b303d6594bf90f1c68a1d24b4bbb5d5	2.4252	51.14	MAT	0.222575	pH_High	NA	NA	NA	unclassified	Unclassified	Unclassified	Unclassified	Unclassified	Unclassified	Unclassified
1611ffd2f80bcad89a61e47a2e15c9bc64ce60e8	2.29921	16.71	AP	NA	NA	NA	NA	NA	unclassified	Unclassified	Unclassified	Unclassified	Unclassified	Unclassified	Unclassified
149aaf81d047cbcd305c82fc91b234e6de3b74f5	2.3622	11.22	MAT	NA	NA	NA	NA	NA	unclassified	Unclassified	Unclassified	Unclassified	Unclassified	Unclassified	Unclassified
1393e627546920b2020d5d1a85744cd7a7b6c46a	2.07874	43.2	Ecosystem_types_group_order	-0.145208	AI_Low	NA	NA	NA	Bacteria	Firmicutes	Bacilli	Bacillales	Paenibacillaceae	Paenibacillus	Paenibacillus mucilaginosus
1387205cfbe6c52b1176ec78579c4598cb6d6475	2.33071	46.63	AI	NA	NA	NA	NA	NA	Bacteria	Actinobacteria	Actinobacteria	Jiangellales	Jiangellaceae	Jiangella	Jiangella sp. DSM 45060
112bbcf8fe7789ad61e84e587dbeed22b2106cbb	3.59055	18.65	pH	NA	NA	NA	NA	NA	Bacteria	Actinobacteria	Actinobacteria	Micrococcales	Dermacoccaceae	Luteipulveratus	Luteipulveratus mongoliensis
107e3829d037d6237e10eae96c8346b085dcfce3	2.01575	3.84	AI	NA	NA	NA	NA	NA	Bacteria	Proteobacteria	Alphaproteobacteria	Rhizobiales	Rhizobiaceae	Sinorhizobium	Sinorhizobium sp. GW3
0ef48f67fa3b34b011db3b869fa4a342c5352f6b	2.45669	26.39	TN	NA	NA	NA	NA	NA	Bacteria	Actinobacteria	Actinobacteria	Micromonosporales	Micromonosporaceae	Plantactinospora	Plantactinospora sp. BC1
0ea46ea17d3fc5154348b32682a4f686589551f0	2.58268	14.84	TOC	NA	NA	NA	NA	NA	unclassified	Unclassified	Unclassified	Unclassified	Unclassified	Unclassified	Unclassified
0d938fc519cd8d0f17e3b140fd1e4a2ddc199345	2.23622	10.8	TOC	NA	NA	NA	NA	NA	Bacteria	Cyanobacteria		Nostocales	Nostocaceae	Nostoc	Nostoc sp. PCC 7524
0ccb0df71f2e7b8e1458f7f3962aba3787bec4de	2.48819	20.15	TN	NA	NA	NA	NA	NA	Bacteria	Proteobacteria	Alphaproteobacteria	Rhodospirillales	Rhodospirillaceae	Oceanibaculum	Oceanibaculum indicum
0ac6c4cf436f7a2df9058a2eb241c86591b16e2d	2.14173	24.87	MAT	NA	NA	NA	NA	NA	Bacteria	Cyanobacteria		Nostocales	Aphanizomenonaceae	Chrysosporum	Chrysosporum ovalisporum
0a8c167d4498594b368658f6548ab70d8dc403f0	2.07874	10.8	TN	NA	NA	NA	NA	NA	Bacteria	Actinobacteria	Actinobacteria	Frankiales	Frankiaceae	Frankia	Frankia sp. EAN1pec
0a19542e453c767cdd1f9f425fc64e456cfd6150	2.04724	18.18	MAT	NA	NA	NA	NA	NA	Bacteria	Proteobacteria	Alphaproteobacteria	Rhodospirillales	Rhodospirillaceae	Oceanibaculum	Oceanibaculum indicum
09a9365f30bfbd582bee37b35237e595815f2d6d	2.48819	-1.46	TP	NA	NA	NA	NA	NA	Bacteria	Cyanobacteria		Nostocales	Rivulariaceae	Calothrix	Calothrix sp. NIES-2100
091183f0894686947f95e966b5222df019eaff95	3.11811	46.12	AI	-0.203007	AI_Low	NA	NA	NA	unclassified	Unclassified	Unclassified	Unclassified	Unclassified	Unclassified	Unclassified
0746ff010c3e3388efdf48a009b2d636cf6071ca	2.23622	26.72	MAT	NA	NA	NA	NA	NA	Bacteria	Planctomycetes	Planctomycetia	Planctomycetales	Gemmataceae	Gemmata	Gemmata obscuriglobus
074690cf6337dac7dc841d89067d8d431b74582b	3.93701	30.94	AI	-0.265713	MAT_Low	NA	NA	NA	Bacteria	Firmicutes	Bacilli	Bacillales	Bacillaceae	Bacillus	Bacillus sp. SA1-12
05b07dec20136888c7ff7c3556dd454da245be37	2.67717	17.49	C:P	NA	NA	NA	NA	NA	unclassified	Unclassified	Unclassified	Unclassified	Unclassified	Unclassified	Unclassified
02f8500aca1e51985e0f958e9c20e1aed9767bc0	4.88189	13.19	AP	NA	NA	NA	NA	NA	unclassified	Unclassified	Unclassified	Unclassified	Unclassified	Unclassified	Unclassified
019a31f90de76864d47ba45b6e98ed0f5e9dea69	2.29921	12.4	AI	NA	NA	NA	NA	NA	Bacteria	Actinobacteria	Actinobacteria	Streptomycetales	Streptomycetaceae		Streptomycetaceae bacterium MP113-05
00d1f3e935b315e90bd6f0f1c0ddb4c5b15a26cf	2.33071	26.35	AI	NA	NA	NA	NA	NA	Bacteria	Cyanobacteria		Nostocales	Scytonemataceae	Scytonema	Scytonema sp. HK-05
fd30a6489efceda3e2ae62a1f7a9490893b226ef	3.08661	25.57	MAT	NA	NA	NA	NA	NA	Bacteria	Proteobacteria	Alphaproteobacteria	Rhizobiales	Methylobacteriaceae	Methylobacterium	Methylobacterium sp. 17Sr1-43
fc7a816202a78bce1265da5d3ca45affae8898b6	11.7165	49.71	MAT	-0.191167	AI_Low	NA	NA	NA	Bacteria	Cyanobacteria		Nostocales			Nostocales cyanobacterium HT-58-2
f8b6b03e06d53d86f88ea5c95fd80534eed1b9a8	2.61417	19.67	AI	NA	NA	NA	NA	NA	Bacteria	Actinobacteria	Actinobacteria	Jiangellales	Jiangellaceae	Jiangella	Jiangella sp. DSM 45060
f0f8688fcec8bc9bb81a087d4da6e1e34acbe236	3.46457	53.41	AI	NA	NA	NA	NA	NA	unclassified	Unclassified	Unclassified	Unclassified	Unclassified	Unclassified	Unclassified
ecde409c1b4d17b8e88178b0e55bfdc5ac4ae0d8	3.37008	33.14	TN	-0.242114	AI_Low	NA	NA	NA	unclassified	Unclassified	Unclassified	Unclassified	Unclassified	Unclassified	Unclassified
ec700c9a343d0329a7f5e9523ce1ed6eaf323d46	2.23622	21.91	AI	NA	NA	NA	NA	NA	Bacteria	Firmicutes	Bacilli	Bacillales	Paenibacillaceae	Paenibacillus	Paenibacillus mucilaginosus
eb20ded2a068313a434a9caeedd83e05035dbf36	2.64567	12.8	pH	NA	NA	NA	NA	NA	Bacteria	Firmicutes	Bacilli	Bacillales	Bacillaceae	Bacillus	Bacillus sp. Root147
e853b911c22033f49baf1174bb1052fc4c107da4	2.51969	36.65	AP	-0.192761	AI_Low	NA	NA	NA	unclassified	Unclassified	Unclassified	Unclassified	Unclassified	Unclassified	Unclassified
e17453f5b702ef136a86c3f5f02b3abb01e8a8e6	2.11024	7.08	C:P	NA	NA	NA	NA	NA	Bacteria	Cyanobacteria		Nostocales	Nostocaceae	Nostoc	Nostoc sp. PCC 7524
deef82804b45295be1e2fa021b91ecd20bed167c	2.96063	48.74	MAT	-0.192802	MAT_Low	NA	NA	NA	Bacteria	Actinobacteria	Actinobacteria	Streptomycetales	Streptomycetaceae	Streptomyces	Streptomyces venezuelae
d8b407f4e3938413a965fc991c126131932735a6	2.20472	14.66	pH	NA	NA	NA	NA	NA	unclassified	Unclassified	Unclassified	Unclassified	Unclassified	Unclassified	Unclassified
d641cae040c063c7579a35a8bec07db943d8d135	2.04724	38.44	AI	-0.11567	MAT_Low	NA	NA	NA	Bacteria	Proteobacteria	Gammaproteobacteria	Pseudomonadales	Pseudomonadaceae	Pseudomonas	Pseudomonas orientalis
d519bbb48bd18f9a702686f1229511f78c310961	2.04724	42.63	pH	-0.155123	MAT_Low	NA	NA	NA	unclassified	Unclassified	Unclassified	Unclassified	Unclassified	Unclassified	Unclassified
d0d7a6215c037670a10aac117f5abce8e836c8c8	2.33071	14.06	TN	NA	NA	NA	NA	NA	Bacteria	Proteobacteria	Alphaproteobacteria	Rhizobiales	Xanthobacteraceae	Pseudolabrys	Pseudolabrys sp. Root1462
cf7af02fae278689b2e8a5e5d9a0dc469132de5a	2.26772	21.26	AI	NA	NA	NA	NA	NA	unclassified	Unclassified	Unclassified	Unclassified	Unclassified	Unclassified	Unclassified
cd26d534ca68892ea2d96032b415e3840abcca71	2.11024	3.79	AP	NA	NA	NA	NA	NA	Bacteria	Actinobacteria	Actinobacteria	Streptosporangiales	Nocardiopsaceae	Streptomonospora	Streptomonospora alba
cc024dc460711c5dd1ad6b2f4251e60786b1d77f	2.04724	16.61	AI	NA	NA	NA	NA	NA	Bacteria	Actinobacteria	Actinobacteria	Streptomycetales	Streptomycetaceae	Streptomyces	Streptomyces venezuelae
c9f0bf8ef6e2f823e927459fa78926e8dbae916b	3.33858	22.52	pH	NA	NA	NA	NA	NA	Bacteria	Proteobacteria	Alphaproteobacteria	Rhizobiales	Methylobacteriaceae	Methylobacterium	Methylobacterium mesophilicum
c8b362379de58d6ee83550032f59c8eef1d76753	2.77165	50.46	AI	0.106203	MAT_High	NA	NA	NA	Bacteria	Proteobacteria	Gammaproteobacteria	Cellvibrionales	Halieaceae	Pseudohaliea	Pseudohaliea rubra
c7b702af444d4ad16e75d746396aee43550c6fb0	2.55118	39.35	MAT	-0.204357	AI_Low	NA	NA	NA	Bacteria	Planctomycetes	Planctomycetia	Planctomycetales	Isosphaeraceae	Isosphaera	Isosphaera pallida
c2e82a3b2085962bd82d5230ef452793d9b2ba26	2.01575	13.43	TN	NA	NA	NA	NA	NA	Bacteria	Cyanobacteria		Nostocales	Nostocaceae	Nostoc	Nostoc punctiforme
c278d04b0cc6c928ac6463eb4a05286572fbc9fb	2.51969	39.2	AI	-0.120211	AI_Low	NA	NA	NA	Bacteria	Proteobacteria	Alphaproteobacteria	Rhizobiales	Bradyrhizobiaceae	Bradyrhizobium	Bradyrhizobium lablabi
c209a9cca93439bfe82f7b76b79dc526b0ca4192	3.43307	6.08	C:P	NA	NA	NA	NA	NA	unclassified	Unclassified	Unclassified	Unclassified	Unclassified	Unclassified	Unclassified
c1b791f3d64edc29e7515b0c93c5651605026661	2.48819	15.74	AI	NA	NA	NA	NA	NA	Bacteria	Actinobacteria	Actinobacteria	Micrococcales	Dermacoccaceae	Luteipulveratus	Luteipulveratus mongoliensis
c0c58b46bd1c7f157cc6ac536b5b57b045a4e32c	2.3622	20.05	MAT	NA	NA	NA	NA	NA	Bacteria	Firmicutes	Bacilli	Bacillales	Bacillaceae	Bacillus	Bacillus atrophaeus
bcd8c04302bdc0d1959580b03a75048abf930435	2.11024	19.29	TP	NA	NA	NA	NA	NA	Bacteria	Actinobacteria	Actinobacteria	Propionibacteriales	Nocardioidaceae	Kribbella	Kribbella flavida
b9f206278a7bfed44bdf8a1dddb8ee99d0a4e957	2.29921	20.14	pH	NA	NA	NA	NA	NA	Bacteria	Proteobacteria	Alphaproteobacteria	Rhizobiales	Bradyrhizobiaceae	Bradyrhizobium	Bradyrhizobium shewense
b9a1f9d24987c15dafe62d5bb91fd726dc683808	2.07874	13.93	TN	NA	NA	NA	NA	NA	Bacteria	Proteobacteria	Alphaproteobacteria	Rhizobiales	Bradyrhizobiaceae	Variibacter	Variibacter gotjawalensis
b7bd0a030ee5dba71fe512a31346e03ef42d9e42	2.23622	6.07	pH	NA	NA	NA	NA	NA	Bacteria	Cyanobacteria		Nostocales	Nostocaceae	Nostoc	Nostoc sp. PCC 7524
b4629ee8cac9e80e761815231bc3fdd5f637aa3c	2.11024	17.77	AI	NA	NA	NA	NA	NA	Bacteria	Actinobacteria	Actinobacteria	Streptomycetales	Streptomycetaceae		Streptomycetaceae bacterium MP113-05
b2167113885ee75de5e67c4cea28cadfd78b943d	2.23622	17.28	AI	NA	NA	NA	NA	NA	unclassified	Unclassified	Unclassified	Unclassified	Unclassified	Unclassified	Unclassified
[truncated: 18,966 more rows]

## Sheet: TableS4_Classification_of_PCGs
ID	Gene	Metabolic_processes	KO number
[truncated: 141 more rows]

## Sheet: TableS5_Matched_PCGs_Counts
OTU_ID	adk	dcd	gdh	glpQ	guaA	pckG	phnF	phoD	purB	ugpE	phoP	phoB	phoX	dut	ugpA	RegX3	cmk	gcd	gmk	gnl	gntK	guaB	lysR	ndk	nrdJ	pckA	phnC	phnE	phnG	phnH	phnI	phnJ	phnK	phnL	phnM	phnN	phnO	phoH	phoR	phoU	pit	ppa	ppc	ppdK	ppk	pps	ppx	prsA	pstA
[truncated: 74 more rows]
[truncated: 69 more columns]
